# Supplementary material
Source: publisher site journal article supplement (https://oneecosystem.pensoft.net/article/download/suppl/3931340/)
Supplement: Supplementary file 1

Date.Time,SoilMoist70,SoilTemp70,RelHum70,AirTemp70,AirPress70,SolarRad70,WindAvg70,WindMax70,WindDir70,Prec70,Dist70,SoilMoist35,SoilTemp35,RelHum35,AirTemp35,AirPress35,SolarRad35,WindAvg35,WindMax35,WindDir35,Prec35,Dist35,SoilMoist0,SoilTemp0,RelHum0,AirTemp0,AirPress0,SolarRad0,WindAvg0,WindMax0,WindDir0,Prec0,Dist0,SoilMoist15,SoilTemp15,RelHum15,AirTemp15,AirPress15,SolarRad15,WindAvg15,WindMax15,WindDir15,Prec15,Dist15,SoilTemp30,SoilMoist30,AirPress30,RelHum30,AirTemp30,SolarRad30,WindDir30,WindMax30,WindAvg30,Prec30,Dist30
2016-06-16 10:00:00,0.177651957,14.30000019,0.761321843,18.10000038,99.53248596,148.3154297,0.660000026,2,258,,-70,0.155185118,13.89999962,0.751684844,18.10000038,99.62042236,73.2421875,0.819999993,2.599999905,253,,-35,,,,,,0,,,,,0,0.102405466,16.10000038,0.662998259,19.79999924,99.679039,754.3945313,1.690000057,5.199999809,216,,15,16.3,0.172839623,99.73766488,0.646777358,20.2,704.9560547,224,5.6,1.72,,30
2016-06-16 11:00:00,0.177252814,14.30000019,0.657100379,19.29999924,99.53248596,250.8544922,0.850000024,2.400000095,276,,-70,0.154766828,13.89999962,0.639220119,19.29999924,99.63507843,139.1601563,1.139999986,2.599999905,266,,-35,0.165118396,15.39999962,0.618071675,19.5,99.6057663,86.05957031,,,,,0,0.103328802,16.29999924,0.578464925,20.79999924,99.679039,798.3398438,1.659999967,4.900000095,231,,15,17,0.172839623,99.73766488,0.570868168,20.9,750.7324219,235,4.5,1.88,,30
2016-06-18 20:00:00,0.204752758,15.30000019,0.795554399,17.70000076,100.675621,7.32421875,0.430000007,0.800000012,169,,-70,0.167977631,14.80000019,0.800378203,17.79999924,100.7489014,10.98632813,0.430000007,0.899999976,143,,-35,0.18712908,16.20000076,0.775826693,17.79999924,99.679039,97.04589844,,,,,0,0.202871114,18.70000076,,,,62.25585938,0.330000013,1.700000048,180,,15,18.9,0.217331861,100.8661456,0.756554745,18.2,84.22851563,190,2.8,0.63,,30
2016-06-18 21:00:00,0.203624755,15.39999962,0.869490683,16.20000076,100.6902771,0,0.519999981,1.100000024,131,,-70,0.167162448,14.89999962,0.88016516,16.29999924,100.7782135,1.831054688,0.529999971,0.899999976,108,,-35,0.177252814,17.20000076,0.847520888,16.70000076,100.7635574,9.155273438,,,,,0,0.202493802,18.5,0.909130871,15.60000038,100.8075256,9.155273438,0.319999993,0.800000012,105,,15,18.7,0.216967222,100.9101124,0.869211277,16.4,14.6484375,128,1.5,0.35,,30
2016-06-19 00:00:00,0.200222999,15.30000019,0.969166577,13.10000038,100.7635574,0,0.360000014,0.699999988,127,,-70,0.165527895,14.80000019,0.995832264,13.19999981,100.8368378,0,0.360000014,0.699999988,108,,-35,0.176453516,17,0.963913202,13.69999981,100.8368378,0,,,,,0,0.200602293,17.79999924,0.989080966,13.10000038,100.8661423,0,0.360000014,0.600000024,111,,15,17.8,0.214772639,100.9687347,0.995142628,12.8,0,136,0.7,0.34,,30
2016-06-19 04:00:00,0.196794465,15.10000038,0.991141498,11.89999962,100.8514862,0,0.50999999,0.899999976,162,,-70,0.163476869,14.60000038,1.013168335,12,100.9101105,0,0.430000007,0.800000012,139,,-35,0.174449235,16.39999962,1.000748873,12.39999962,100.8807983,0,,,,,0,0.197558671,16.79999924,1.012162328,11.80000019,100.9833908,0,0.389999986,1.100000024,135,,15,16.7,0.213303139,101.0420127,1.018298028,11.6,0,170,1.2,0.49,,30
2016-06-21 13:00:00,0.162654012,15.10000038,0.829511285,17.89999962,101.0713272,47.60742188,1.440000057,2.799999952,292,,-70,0.143766493,14.60000038,0.829158127,18,101.159256,49.43847656,2.140000105,4.699999809,279,,-35,0.163887769,16.60000038,0.814872861,17.89999962,101.1445999,146.484375,,,,,0,0.172839627,17.79999924,0.798525333,18.60000038,101.2032242,225.2197266,1.590000033,5.599999905,265,,15,18,0.192181194,101.2911578,0.793544439,18.7,236.2060547,276,5.7,1.69,,30
2016-06-21 14:00:00,0.16224207,15.19999981,0.760161757,19.20000076,101.1152878,89.72167969,1.350000024,2.700000048,284,,-70,0.143338576,14.69999981,0.755441964,19.29999924,101.2032242,89.72167969,1.909999967,4.300000191,274,,-35,,,,,,0,,,,0.05,0,0.172436357,18,0.71864152,20.20000076,101.2471924,399.1699219,1.720000029,5.5,252,,15,18.2,0.190632745,101.320469,0.714213498,20.3,415.6494141,262,5.7,1.85,,30
2016-06-21 15:00:00,0.161829755,15.19999981,0.710579038,19.89999962,101.159256,69.58007813,0.99000001,2.200000048,278,,-70,0.143338576,14.69999981,0.706272542,19.89999962,101.2471924,73.2421875,1.360000014,3.099999905,268,,-35,,,,,,0,,,,,0,0.171628788,18.20000076,0.672212422,20.70000076,101.3058167,318.6035156,1.659999967,4.900000095,234,,15,18.4,0.190244794,101.3644358,0.668113541,20.7,333.2519531,248,5.3,1.72,,30
2016-06-21 16:00:00,0.161004096,15.30000019,0.659939826,20.89999962,101.2032242,76.90429688,1,2.299999952,288,,-70,0.142910302,14.80000019,0.647879064,21.10000038,101.2765045,104.3701172,1.49000001,3.200000048,276,,-35,,,,,,0,,,,,0,0.17122449,18.39999962,0.598451376,22.5,101.3497772,560.3027344,1.360000014,4,248,,15,18.7,0.189856508,101.3937469,0.598451369,22.5,582.2753906,265,4.5,1.42,,30
2016-06-21 17:00:00,0.160590753,15.39999962,0.594064474,21.89999962,101.2032242,130.0048828,0.879999995,1.799999952,277,,-70,0.142910302,14.89999962,0.586666107,22,101.2765045,89.72167969,1.230000019,2.799999952,265,,-35,,,,,,0,,,,,0,0.17122449,18.70000076,0.542160809,23.29999924,101.3644333,428.4667969,1.360000014,4.599999905,237,,15,19,0.189467885,101.3790914,0.538662977,23.3,466.9189453,252,4.7,1.46,,30
2016-06-21 18:00:00,0.159762979,15.5,0.590256333,21.89999962,101.2178802,36.62109375,0.579999983,1.5,269,,-70,0.142910302,14.89999962,0.576041996,22.29999924,101.2911606,38.45214844,0.850000024,2.5,264,,-35,,,,,,0,,,,,0,0.170819849,18.89999962,0.516424835,24,101.3644333,318.6035156,0.980000019,3.700000048,245,,15,19.2,0.189467885,101.3937469,0.512790274,23.9,357.0556641,255,3.4,1.02,,30
2016-06-21 19:00:00,0.159348577,15.5,0.659919024,21,101.2471924,12.81738281,0.319999993,1,158,,-70,0.142481655,15,0.636083126,21.60000038,101.3204727,29.296875,0.419999987,1.200000048,232,,-35,,,,,,0,,,,,0,0.17041485,19.10000038,0.56656003,23.20000076,101.3937454,148.3154297,0.629999995,2.400000095,230,,15,19.2,0.189467885,101.4230581,0.566331088,23,173.9501953,236,2.9,0.72,,30
2016-06-21 20:00:00,0.158933818,15.60000038,0.79818505,18.70000076,101.2618484,0,0.479999989,0.699999988,108,,-70,0.142481655,15,0.797435939,18.89999962,101.3351212,0,0.540000021,0.899999976,88,,-35,,,,,,0,,,,,0,0.170009524,19.10000038,0.773966968,19.10000038,101.3644333,18.31054688,0.389999986,0.600000024,104,,15,19.1,0.189078927,101.4523693,0.788270001,18.9,20.14160156,120,0.7,0.39,,30
2016-06-21 21:00:00,0.158518702,15.69999981,0.85195148,17.10000038,101.2911606,0,0.610000014,1,119,,-70,0.142052665,15.10000038,0.861875176,17.20000076,101.3790894,0,0.579999983,0.800000012,104,,-35,,,,,,0,,,,,0,0.170009524,18.89999962,0.851675451,17.20000076,101.3937454,0,0.419999987,0.600000024,109,,15,18.9,0.188689632,101.4963361,0.868016244,16.9,0,129,0.7,0.43,,30
2016-06-21 22:00:00,0.158518702,15.69999981,0.869365573,16.29999924,101.3204727,0,0.610000014,1.100000024,125,,-70,0.141623303,15.10000038,0.885564923,16.29999924,101.4084015,0,0.589999974,1,108,,-35,,,,,,0,,,,,0,0.16960384,18.70000076,0.880359292,16.20000076,101.4084015,0,0.389999986,0.699999988,109,,15,18.6,0.1883,101.5256473,0.891667998,16,0,132,0.8,0.39,,30
2016-06-21 23:00:00,0.158103243,15.69999981,0.886415124,15.80000019,101.3497772,0,0.569999993,1,150,,-70,0.141623303,15.10000038,0.897564948,15.80000019,101.4377136,0,0.629999995,1.100000024,121,,-35,,,,,,0,,,,,0,0.169197798,18.5,0.909293354,15.5,101.4523697,0,0.379999995,0.800000012,133,,15,18.3,0.187910032,101.5696141,0.909424912,15.4,0,166,1.4,0.39,,30
2016-06-22 00:00:00,0.157687426,15.60000038,0.886561036,15.5,101.3937454,0,0.790000021,1.299999952,159,,-70,0.141193599,15,0.903610289,15.5,101.4670258,0,0.75,1.299999952,127,,-35,,,,,,0,,,,,0,0.169197798,18.20000076,0.921291173,15.10000038,101.4816818,0,0.439999998,1.100000024,141,,15,18,0.187910032,101.5842697,0.915460202,15.1,0,175,1.5,0.47,,30
2016-06-22 01:00:00,0.157687426,15.60000038,0.897927225,15.5,101.4084015,0,0.709999979,1.200000048,133,,-70,0.141193599,15,0.914976478,15.5,101.4963379,0,0.730000019,1.200000048,110,,-35,,,,,,0,,,,,0,0.168791428,18,0.927321732,14.89999962,101.4963379,0,0.469999999,1.200000048,119,,15,17.8,0.187519726,101.6135809,0.933372702,14.7,0,162,1.5,0.41,,30
2016-06-22 02:00:00,0.157271251,15.5,0.915035129,14.39999962,101.4230576,0,0.899999976,1.600000024,162,,-70,0.141193599,15,0.933382571,14.5,101.510994,0,0.790000021,1.5,132,,-35,,,,,,0,,,,,0,0.168384701,17.79999924,0.951642334,14.10000038,101.52565,0,0.49000001,1.299999952,142,,15,17.6,0.187129083,101.6282364,0.945495825,14.2,0,172,1.6,0.51,,30
2016-06-22 03:00:00,0.157271251,15.5,0.921135366,14.39999962,101.4084015,0,0.889999986,1.5,163,,-70,0.140763521,15,0.939436078,14.39999962,101.4963379,0,0.779999971,1.200000048,133,,-35,,,,,,0,,,,,0,0.168384701,17.60000038,0.951573312,14,101.52565,0,0.460000008,1.299999952,147,,15,17.4,0.186738103,101.6135809,0.951573335,14,0,181,1.7,0.51,,30
2016-06-22 04:00:00,0.156854734,15.39999962,0.920974314,14.30000019,101.4084015,0,0.899999976,1.399999976,161,,-70,0.140763521,14.89999962,0.945533633,14.30000019,101.4963379,0,0.810000002,1.299999952,132,,-35,,,,,,0,,,,,0,0.167977631,17.39999962,0.964010119,13.80000019,101.52565,0,0.430000007,1.100000024,147,,15,17.2,0.186346786,101.6135809,0.957667952,13.8,0,188,1.4,0.5,,30
2016-06-22 05:00:00,0.156437859,15.39999962,0.927114129,14.30000019,101.4377136,1.831054688,0.930000007,1.5,162,,-70,0.140333071,14.89999962,0.945533633,14.30000019,101.52565,1.831054688,0.810000002,1.200000048,133,,-35,,,,,,0,,,,,0,0.167977631,17.20000076,0.964070201,13.89999962,101.5549622,21.97265625,0.430000007,1.200000048,154,,15,17,0.186346786,101.642892,0.951573335,14,27.46582031,190,1.5,0.48,,30
2016-06-22 06:00:00,0.156437859,15.30000019,0.921038032,15.30000019,101.4816818,14.6484375,0.829999983,1.299999952,159,,-70,0.140333071,14.80000019,0.944063962,15.30000019,101.5696106,12.81738281,0.74000001,1.200000048,132,,-35,,,,,,0,,,,,0,0.167570204,17.10000038,0.949820459,15.30000019,101.5989227,65.91796875,0.360000014,1.200000048,153,,15,16.8,0.186346786,101.6868588,0.931717985,15.6,80.56640625,187,2.2,0.47,,30
2016-06-22 07:00:00,0.156020626,15.19999981,0.915954232,16.70000076,101.4963379,29.296875,0.699999988,1.299999952,162,,-70,0.139902279,14.80000019,0.931079745,16.79999924,101.5842667,23.80371094,0.639999986,1.100000024,135,,-35,,,,,,0,,,,,0,0.167162448,17.10000038,0.90643847,17.39999962,101.6135788,201.4160156,0.280000001,1.600000024,180,,15,16.8,0.18595513,101.7015144,0.867328679,18.1,228.8818359,193,1.9,0.46,,30
2016-06-22 08:00:00,0.155603051,15.19999981,0.866997123,18.79999924,101.510994,51.26953125,0.460000008,1.100000024,164,,-70,0.139902279,14.69999981,0.884512246,18.89999962,101.5989227,62.25585938,0.419999987,1.200000048,133,,-35,,,,,,0,,,,,0,0.167162448,17.10000038,0.805850089,20.39999962,101.6282349,194.0917969,0.349999994,2.700000048,214,,15,16.9,0.185563137,101.7015144,0.722924068,22,424.8046875,201,2.8,0.57,,30
2016-06-22 09:00:00,0.155185118,15.19999981,0.829985619,20.89999962,101.52565,102.5390625,0.330000013,1,142,,-70,0.139471114,14.69999981,0.840994358,21,101.5989227,71.41113281,0.340000004,1.399999976,89,,-35,,,,,,0,,,,,0,0.167162448,17.20000076,0.746996403,22.29999924,101.6428909,274.6582031,0.469999999,3.700000048,225,,15,17.1,0.185563137,101.7015144,0.666406351,23.6,514.5263672,212,2.9,0.7,,30
2016-06-22 10:00:00,0.154766828,15.19999981,0.684921801,23.39999962,101.52565,166.6259766,0.409999996,1.5,167,,-70,0.139471114,14.69999981,0.692566693,23.29999924,101.5989227,71.41113281,0.360000014,1.5,146,,-35,,,,,,0,,,,,0,0.166754335,17.5,0.596149564,25.20000076,101.7015152,752.5634766,0.870000005,3.799999952,226,,15,17.6,0.185170805,101.6868588,0.570893823,25.3,714.1113281,223,4,1.23,,30
2016-06-22 11:00:00,0.153929189,15.30000019,0.613733768,24.79999924,101.510994,265.5029297,0.469999999,1.399999976,190,,-70,0.139039591,14.80000019,0.607340693,24.79999924,101.5989227,140.9912109,0.49000001,1.5,189,,-35,,,,,,0,,,,,0,0.166345865,17.79999924,0.543892682,26.29999924,101.6868591,851.4404297,1.120000005,3.900000095,225,,15,18.4,0.185170805,101.6868588,0.535120192,26.3,811.1572266,221,4.4,1.34,,30
2016-06-22 12:00:00,0.15350984,15.39999962,0.580543578,25.20000076,101.510994,159.3017578,0.49000001,1.600000024,235,,-70,0.139039591,14.89999962,0.577099204,25.29999924,101.5989227,109.8632813,0.600000024,1.700000048,232,,-35,,,,,,0,,,,,0,0.165937051,18.39999962,0.538044333,26.29999924,101.6722031,613.4033203,1.370000005,4,219,,15,19.5,0.18595513,101.6868588,0.529271884,26.3,598.7548828,224,4.2,1.47,,30
2016-06-22 13:00:00,0.153090134,15.60000038,0.557206929,25.79999924,101.4963379,122.6806641,0.460000008,1.200000048,236,,-70,0.138607711,15.10000038,0.551430583,25.70000076,101.5696106,153.8085938,0.589999974,1.5,234,,-35,,,,,,0,,,,,0,0.165937051,19,0.505513132,26.70000076,101.657547,675.6591797,1.480000019,4.300000191,217,,15,20.4,0.18595513,101.6575476,0.493868265,27,677.4902344,218,4.4,1.52,,30
2016-06-22 14:00:00,0.152670071,15.80000019,0.537785172,26.39999962,101.4816818,142.8222656,0.360000014,1.100000024,188,,-70,0.138607711,15.19999981,0.540692151,26.39999962,101.5549622,106.2011719,0.389999986,1.5,186,,-35,,,,,,0,,,,,0,0.165527895,19.70000076,0.495573133,27.70000076,101.6428909,551.1474609,0.980000019,3.900000095,223,,15,21.1,0.18595513,101.6575476,0.484799814,27.7,567.6269531,222,3.7,1.16,,30
2016-06-22 15:00:00,0.152249649,15.89999962,0.615075946,24.5,101.4963379,43.9453125,0.469999999,1.200000048,226,,-70,0.138175473,15.30000019,0.610979259,24.70000076,101.5696106,36.62109375,0.479999989,1.299999952,218,,-35,,,,,,0,,,,,0,0.165527895,20.29999924,0.597371459,24.89999962,101.657547,168.4570313,1.340000033,4.300000191,214,,15,21.8,0.18595513,101.6722032,0.597371487,24.9,175.78125,221,4,1.29,,30
2016-06-22 16:00:00,0.151828885,16.10000038,0.657855928,23.89999962,101.510994,32.95898438,0.349999994,0.800000012,235,,-70,0.138175473,15.5,0.653333068,24.10000038,101.5842667,34.79003906,0.409999996,1,220,,-35,,,,,,0,,,,,0,0.165118396,20.5,0.631347835,24.5,101.6722031,155.6396484,1.039999962,4.099999905,213,,15,21.8,0.185170805,101.6868588,0.627582274,24.6,164.7949219,222,3.1,1.06,,30
2016-06-22 17:00:00,0.151407763,16.29999924,0.708449602,23.5,101.4963379,25.63476563,0.140000001,0.5,202,,-70,0.138175473,15.60000038,0.711062431,23.60000038,101.5696106,29.296875,0.180000007,0.600000024,199,,-35,,,,,,0,,,,,0,0.165118396,20.5,0.66201055,24.29999924,101.6428909,142.8222656,0.50999999,2,213,,15,21.6,0.185170805,101.6868588,0.652129775,24.3,150.1464844,214,2.3,0.61,,30
2016-06-22 18:00:00,0.150986269,16.29999924,0.659364879,24.20000076,101.4523697,31.12792969,0.25999999,0.899999976,227,,-70,0.138175473,15.69999981,0.661330104,24.39999962,101.5549622,36.62109375,0.330000013,1,216,,-35,,,,,,0,,,,,0,0.16470854,20.39999962,0.586851299,25.89999962,101.6135788,243.5302734,0.860000014,2.400000095,220,,15,21.4,0.184778135,101.642892,0.583857177,25.9,265.5029297,221,2.2,0.84,,30
2016-06-22 19:00:00,0.150564432,16.39999962,0.748943686,22.89999962,101.4963379,10.98632813,0.280000001,0.600000024,112,,-70,0.137742862,15.69999981,0.739932239,23.10000038,101.5696106,16.47949219,0.280000001,0.699999988,107,,-35,,,,,,0,,,,,0,0.164298326,20.39999962,0.682558596,24.20000076,101.6135788,91.55273438,0.319999993,1.200000048,130,,15,21.3,0.184778135,101.6722032,0.679999744,24.1,102.5390625,165,1.6,0.4,,30
2016-06-22 20:00:00,0.150564432,16.5,0.779698193,22,101.4963379,3.662109375,0.389999986,0.699999988,120,,-70,0.137742862,15.80000019,0.777731001,22.20000076,101.5696106,7.32421875,0.370000005,0.699999988,107,,-35,,,,,,0,,,,,0,0.163887769,20.39999962,0.72572881,23.5,101.6135788,54.93164063,0.25999999,0.600000024,103,,15,21.1,0.184385126,101.6868588,0.726642911,23.4,67.74902344,126,0.7,0.35,,30
2016-06-22 21:00:00,0.150142252,16.60000038,0.815672338,20.70000076,101.52565,0,0.5,0.800000012,122,,-70,0.137742862,15.80000019,0.818813026,20.79999924,101.5989227,0,0.479999989,0.800000012,99,,-35,,,,,,0,,,,,0,0.163887769,20.20000076,0.806591928,20.79999924,101.6135788,1.831054688,0.360000014,0.600000024,110,,15,20.9,0.183991778,101.71617,0.811573503,20.7,1.831054688,124,0.7,0.5,,30
2016-06-22 22:00:00,0.150142252,16.60000038,0.857371151,19.39999962,101.5403061,0,0.540000021,0.800000012,122,,-70,0.137742862,15.80000019,0.865300357,19.5,101.6135788,0,0.469999999,0.699999988,105,,-35,,,,,,0,,,,,0,0.163476869,20,0.867193758,19.29999924,101.6428909,0,0.330000013,0.600000024,109,,15,20.6,0.183598091,101.7454812,0.879007738,19,0,127,0.6,0.39,,30
2016-06-22 23:00:00,0.1497197,16.60000038,0.881716073,18.70000076,101.5549622,0,0.550000012,1,136,,-70,0.137309894,15.80000019,0.885443866,18.79999924,101.6282349,0,0.610000014,1,118,,-35,,,,,,0,,,,,0,0.163476869,19.79999924,0.892823696,18.5,101.657547,0,0.400000006,0.800000012,122,,15,20.2,0.183204065,101.7454812,0.899330354,18.3,0,144,1.1,0.51,,30
2016-06-23 00:00:00,0.14929679,16.60000038,0.881051123,18.20000076,101.5696106,0,0.540000021,0.899999976,156,,-70,0.137309894,15.80000019,0.895416081,18.20000076,101.657547,0,0.569999993,1,124,,-35,,,,,,0,,,,,0,0.163065612,19.5,0.903494418,17.79999924,101.6722031,0,0.389999986,0.800000012,136,,15,19.9,0.183204065,101.7747924,0.903494396,17.8,0,157,1.3,0.56,,30
2016-06-23 01:00:00,0.14929679,16.5,0.897042394,18,101.5842667,0,0.560000002,0.899999976,150,,-70,0.136876568,15.80000019,0.901891291,18,101.657547,0,0.610000014,1.100000024,121,,-35,,,,,,0,,,,,0,0.162654012,19.29999924,0.909983635,17.60000038,101.6722031,0,0.379999995,0.800000012,134,,15,19.6,0.182414994,101.7747924,0.910740172,17.5,0,159,1.4,0.52,,30
2016-06-23 02:00:00,0.148873523,16.5,0.890723884,17.5,101.5696106,0,0.699999988,1.200000048,166,,-70,0.136876568,15.69999981,0.910740197,17.5,101.6428909,0,0.639999986,1,134,,-35,,,,,,0,,,,,0,0.162654012,19.10000038,0.930388689,16.89999962,101.657547,0,0.379999995,1,180,,15,19.3,0.182019949,101.7747924,0.925190967,16.9,0,194,1.4,0.54,,30
2016-06-23 03:00:00,0.148873523,16.39999962,0.896366954,17.39999962,101.5696106,0,0.680000007,1,163,,-70,0.13644287,15.69999981,0.90643847,17.39999962,101.657547,0,0.639999986,1,131,,-35,,,,,,0,,,,,0,0.16224207,18.89999962,0.943668664,16.5,101.6722031,0,0.340000004,0.899999976,168,,15,19,0.182019949,101.7747924,0.938337184,16.5,0,188,1.2,0.5,,30
2016-06-23 04:00:00,0.148449913,16.39999962,0.898684502,17,101.5696106,0,0.730000019,1.5,164,,-70,0.13644287,15.60000038,0.914179087,17,101.657547,0,0.689999998,1.100000024,129,,-35,,,,,,0,,,,,0,0.16224207,18.70000076,0.938337207,16.5,101.6868591,0,0.360000014,1,148,,15,18.8,0.182019949,101.789448,0.927091021,16.6,0,174,1.5,0.48,,30
2016-06-23 05:00:00,0.148449913,16.29999924,0.910156608,16.79999924,101.5696106,0,0.699999988,1.299999952,161,,-70,0.13644287,15.60000038,0.920618176,16.79999924,101.6722031,0,0.689999998,1.200000048,126,,-35,,,,,,0,,,,,0,0.161829755,18.5,0.938962817,16.39999962,101.6868591,10.98632813,0.330000013,0.800000012,154,,15,18.6,0.181624563,101.789448,0.933597297,16.4,12.81738281,184,1.1,0.44,,30
2016-06-23 06:00:00,0.14802593,16.29999924,0.905011058,17.60000038,101.5842667,7.32421875,0.479999989,0.899999976,163,,-70,0.13644287,15.5,0.919928849,17.60000038,101.6722031,5.493164063,0.439999998,1,132,,-35,,,,,,0,,,,,0,0.161829755,18.39999962,0.939199507,17.10000038,101.6868591,21.97265625,0.200000003,0.699999988,188,,15,18.4,0.181228838,101.789448,0.921545797,17.4,27.46582031,195,1,0.32,,30
2016-06-23 07:00:00,0.14802593,16.20000076,0.890055537,18.79999924,101.5696106,27.46582031,0.289999992,0.800000012,153,,-70,0.136008814,15.5,0.908502281,18.79999924,101.657547,23.80371094,0.25,0.600000024,128,,-35,,,,,,0,,,,,0,0.161417112,18.29999924,0.871663809,19.29999924,101.6868591,183.1054688,0.189999998,1.200000048,163,,15,18.3,0.180832772,101.7747924,0.82672702,20.4,221.5576172,182,1.4,0.33,,30
2016-06-23 08:00:00,0.147601604,16.20000076,0.85954994,20.79999924,101.5696106,38.45214844,0.209999993,0.800000012,144,,-70,0.136008814,15.39999962,0.879918456,20.79999924,101.6428909,87.890625,0.219999999,0.899999976,102,,-35,,,,,,0,,,,,0,0.161004096,18.20000076,0.759996533,22.5,101.6868591,124.5117188,0.389999986,2.099999905,226,,15,18.3,0.180436365,101.7454812,0.662430174,24.7,454.1015625,204,2.3,0.57,,30
2016-06-23 09:00:00,0.147176906,16.10000038,0.739552259,23.5,101.5989227,98.87695313,0.280000001,1.100000024,170,,-70,0.135574386,15.39999962,0.753375649,23.5,101.6722031,64.08691406,0.25999999,1.100000024,149,,-35,,,,,,0,,,,,0,0.161004096,18.29999924,0.638679087,24.89999962,101.7454834,186.7675781,0.529999971,2.5,227,,15,18.5,0.180436365,101.7601368,0.547585392,26.9,585.9375,225,2.8,0.82,,30
2016-06-23 10:00:00,0.146751866,16.20000076,0.631763399,25.89999962,101.5696106,161.1328125,0.349999994,1.200000048,168,,-70,0.135139614,15.5,0.642325699,25.70000076,101.657547,65.91796875,0.340000004,1.5,158,,-35,,,,,,0,,,,,0,0.161004096,18.39999962,0.544053137,27.70000076,101.7454834,745.2392578,0.779999971,3.700000048,234,,15,18.9,0.180436365,101.7454812,0.510454432,28.1,701.2939453,229,3.8,0.94,,30
2016-06-23 11:00:00,0.146326452,16.29999924,0.569527745,27.5,101.5549622,245.3613281,0.379999995,1.700000048,182,,-70,0.135139614,15.5,0.581094325,27.39999962,101.6135788,126.3427734,0.389999986,1.600000024,213,,-35,,,,,,0,,,,,0,0.160590753,18.70000076,0.504861295,28.89999962,101.7161713,823.9746094,0.860000014,3.900000095,249,,15,19.7,0.180436365,101.7015144,0.489460974,29,785.5224609,230,7.3,0.96,,30
2016-06-23 12:00:00,0.145900697,16.39999962,0.52599293,28.70000076,101.4963379,252.6855469,0.419999987,1.799999952,156,,-70,0.135139614,15.60000038,0.52547878,28.79999924,101.5696106,155.6396484,0.389999986,1.600000024,154,,-35,,,,,,0,,,,,0,0.160590753,19.29999924,0.481299698,29.89999962,101.657547,867.9199219,0.910000026,3.700000048,247,,15,20.9,0.181228838,101.642892,0.462040612,30,838.6230469,229,4.8,0.98,,30
2016-06-23 13:00:00,0.145474568,16.5,0.471815974,29.89999962,101.4377136,124.5117188,0.419999987,2.400000095,134,,-70,0.134704471,15.80000019,0.486459881,29.79999924,101.510994,144.6533203,0.389999986,1.899999976,132,,-35,,,,,,0,,,,,0,0.160177037,20.10000038,0.447793126,30.89999962,101.5842667,867.9199219,0.920000017,4.300000191,250,,15,22,0.181624563,101.5696141,0.427436406,31,853.2714844,228,4.1,1.05,,30
2016-06-23 14:00:00,0.144621253,16.70000076,0.445554167,30.89999962,101.3644333,386.3525391,0.349999994,1.299999952,191,,-70,0.134704471,16,0.457465738,30.70000076,101.4377136,124.5117188,0.379999995,1.299999952,186,,-35,,,,,,0,,,,,0,0.159762979,21.10000038,0.419311881,31.70000076,101.510994,818.4814453,1.059999943,4.699999809,232,,15,23.3,0.182019949,101.5109917,0.406475798,31.7,818.4814453,227,4.7,1.22,,30
2016-06-23 15:00:00,0.144621253,16.89999962,0.449698716,31,101.3058167,150.1464844,0.370000005,1.399999976,168,,-70,0.134704471,16.10000038,0.454151183,31,101.3790894,161.1328125,0.360000014,1.399999976,162,,-35,,,,,,0,,,,,0,0.159348577,22.20000076,0.412741542,32.59999847,101.4670258,726.9287109,0.829999983,3.5,250,,15,24.3,0.182019949,101.4523693,0.39667253,32.5,743.4082031,232,3.7,0.85,,30
2016-06-23 16:00:00,0.144194052,17.10000038,0.478762984,30.5,101.2618484,73.2421875,0.389999986,1.5,142,,-70,0.134704471,16.29999924,0.471053839,30.70000076,101.3204727,89.72167969,0.439999998,1.5,150,,-35,,,,,,0,,,,,0,0.159348577,23.10000038,0.403830826,32.90000153,101.4230576,613.4033203,0.709999979,3.5,254,,15,24.7,0.182019949,101.3937469,0.388014811,32.8,640.8691406,234,4.2,0.79,,30
2016-06-23 17:00:00,0.143766493,17.29999924,0.527366996,30.10000038,101.2178802,155.6396484,0.280000001,1,124,,-70,0.134268954,16.39999962,0.529710889,30.10000038,101.2765045,109.8632813,0.310000002,1.299999952,116,,-35,,,,,,0,,,,,0,0.158933818,23.5,0.427820772,32.90000153,101.3644333,472.4121094,0.49000001,3.700000048,271,,15,24.7,0.181624563,101.3497802,0.393835016,32.9,512.6953125,215,4.3,0.65,,30
2016-06-23 18:00:00,0.142910302,17.5,0.574272513,28.70000076,101.173912,36.62109375,0.300000012,1.100000024,118,,-70,0.134268954,16.5,0.573479235,28.79999924,101.2471924,32.95898438,0.289999992,0.899999976,112,,-35,,,,,,0,,,,,0,0.158103243,23.60000038,0.458013654,32.5,101.3058167,325.9277344,0.310000002,3.700000048,290,,15,24.6,0.181624563,101.3058134,0.416488385,32.7,366.2109375,218,2.6,0.42,,30
2016-06-23 19:00:00,0.142910302,17.60000038,0.608504474,27.39999962,101.1152878,12.81738281,0.280000001,0.800000012,115,,-70,0.134268954,16.60000038,0.594437778,27.79999924,101.1885681,38.45214844,0.25,0.899999976,109,,-35,,,,,,0,,,,,0,0.157687426,23.39999962,0.513550222,31.10000038,101.2618484,183.1054688,0.180000007,1.899999976,20,,15,24.4,0.180832772,101.2618466,0.476567012,31.4,219.7265625,192,2.3,0.23,,30
2016-06-23 20:00:00,0.142481655,17.70000076,0.676675498,25.89999962,101.0859833,3.662109375,0.340000004,1.299999952,112,,-70,0.133833081,16.70000076,0.667715073,26.20000076,101.159256,9.155273438,0.25,0.800000012,104,,-35,,,,,,0,,,,,0,0.157271251,23.29999924,0.601542771,28.5,101.2325363,69.58007813,0.180000007,1.5,8,,15,24.1,0.180436365,101.247191,0.581776937,28.4,87.890625,155,2.2,0.21,,30
2016-06-23 21:00:00,0.142052665,17.79999924,0.66330874,25,101.0713272,0,0.409999996,1.600000024,120,,-70,0.133833081,16.70000076,0.684057415,24.79999924,101.1299438,0,0.319999993,1,101,,-35,,,,,,0,,,,,0,0.157271251,23,0.656227589,25.10000038,101.1885681,3.662109375,0.280000001,2.799999952,313,,15,23.6,0.180436365,101.247191,0.603477739,25.6,5.493164063,264,2.3,0.44,,30
2016-06-23 22:00:00,0.142052665,17.79999924,0.678793907,23.79999924,101.0566711,0,0.270000011,0.899999976,156,,-70,0.133833081,16.79999924,0.720549166,23.29999924,101.1445999,0,0.150000006,0.600000024,221,,-35,,,,,,0,,,,,0,0.156854734,22.60000038,0.713548839,22.29999924,101.173912,0,0.479999989,2,223,,15,23.2,0.179642528,101.247191,0.681908217,22.7,0,229,2.4,0.5,,30
2016-06-23 23:00:00,0.141623303,17.79999924,0.684996068,22.79999924,101.027359,0,0.479999989,1.100000024,166,,-70,0.133396849,16.79999924,0.741101861,22.10000038,101.1152878,0,0.219999999,0.800000012,118,,-35,,,,,,0,,,,,0,0.156437859,22.20000076,0.743283808,21.20000076,101.1445999,0,0.449999988,1.799999952,222,,15,22.7,0.178847326,101.2325354,0.704982679,21.8,0,226,2.8,0.53,,30
2016-06-24 00:00:00,0.141623303,17.79999924,0.711006343,22.10000038,101.027359,0,0.5,1.100000024,127,,-70,0.133396849,16.79999924,0.747852623,21.70000076,101.1152878,0,0.310000002,1,87,,-35,,,,,,0,,,,,0,0.156020626,21.79999924,0.814664483,19.79999924,101.1299438,0,0.379999995,1.5,233,,15,22.3,0.178847326,101.2325354,0.791156905,20.1,0,226,1.3,0.41,,30
2016-06-24 01:00:00,0.141193599,17.79999924,0.75918293,21.20000076,101.027359,0,0.389999986,1.200000048,162,,-70,0.133396849,16.70000076,0.81164217,20.20000076,101.1152878,0,0.180000007,0.899999976,195,,-35,,,,,,0,,,,,0,0.156020626,21.5,0.863153577,18.70000076,101.1152878,0,0.600000024,1.700000048,218,,15,21.9,0.178449213,101.2178798,0.83801774,19,0,224,1.8,0.71,,30
2016-06-24 02:00:00,0.141193599,17.70000076,0.790505648,20.20000076,101.0127029,0,0.50999999,1.299999952,172,,-70,0.132960245,16.70000076,0.840373337,19.29999924,101.0859833,0,0.310000002,0.800000012,194,,-35,,,,,,0,,,,,0,0.156020626,21.20000076,0.902703464,17.89999962,101.0859833,0,0.680000007,1.700000048,213,,15,21.6,0.177651959,101.2178798,0.870064697,18.4,0,222,1.7,0.77,,30
2016-06-24 03:00:00,0.140763521,17.60000038,0.838682592,18.89999962,100.9980469,0,0.779999971,1.399999976,175,,-70,0.132960245,16.60000038,0.857773721,18.79999924,101.0713272,0,0.699999988,1.299999952,161,,-35,,,,,,0,,,,,0,0.155603051,20.89999962,0.908404708,17.79999924,101.0859833,0,0.629999995,1.700000048,214,,15,21.2,0.177651959,101.2178798,0.897823991,17.9,0,222,2.1,0.76,,30
2016-06-24 04:00:00,0.140763521,17.60000038,0.855231106,18.5,100.9833908,0,0.850000024,1.399999976,174,,-70,0.132960245,16.60000038,0.858512998,18.70000076,101.0713272,0,0.839999974,1.399999976,154,,-35,,,,,,0,,,,,0,0.155603051,20.60000038,0.915744245,17.5,101.0713272,0,0.699999988,1.700000048,213,,15,20.9,0.177252819,101.2032242,0.8985841,17.8,0,218,2.3,0.82,,30
2016-06-24 05:00:00,0.140333071,17.5,0.852431536,18.89999962,100.9687347,0,0.99000001,1.700000048,165,,-70,0.132523268,16.5,0.861597419,18.89999962,101.0566711,0,0.860000014,1.5,140,,-35,,,,,,0,,,,,0,0.155185118,20.39999962,0.918225288,17.79999924,101.0713272,9.155273438,0.610000014,1.799999952,213,,15,20.7,0.177252819,101.1885686,0.890627738,18.2,12.81738281,215,2.3,0.75,,30
2016-06-24 06:00:00,0.140333071,17.39999962,0.826855659,19.89999962,100.9247665,7.32421875,0.920000017,1.600000024,163,,-70,0.132523268,16.39999962,0.839775264,19.89999962,101.0127029,5.493164063,0.769999981,1.399999976,142,,-35,,,,,,0,,,,,0,0.155185118,20.10000038,0.881607711,19.20000076,101.027359,20.14160156,0.430000007,1.700000048,207,,15,20.4,0.177252819,101.1152907,0.844997755,19.8,25.63476563,214,2.8,0.71,,30
2016-06-24 07:00:00,0.139902279,17.39999962,0.800972581,21.39999962,100.9247665,27.46582031,0.610000014,1.299999952,161,,-70,0.132085949,16.39999962,0.808825254,21.39999962,101.027359,23.80371094,0.479999989,1.200000048,131,,-35,,,,,,0,,,,,0,0.154766828,20,0.802860975,21.60000038,101.0713272,181.2744141,0.370000005,2.700000048,205,,15,20.3,0.176453511,101.1446019,0.747197302,22.7,219.7265625,203,2.5,0.6,,30
2016-06-24 08:00:00,0.139471114,17.29999924,0.782337606,22.79999924,100.9540787,40.28320313,0.200000003,0.800000012,164,,-70,0.132085949,16.39999962,0.77533567,23.10000038,101.0566711,86.05957031,0.25,0.899999976,218,,-35,,,,,,0,,,,,0,0.154766828,19.89999962,0.685811579,24.60000038,101.1152878,124.5117188,0.779999971,2.400000095,209,,15,20.2,0.176453511,101.1592574,0.616272759,26.4,454.1015625,221,3,0.95,,30
2016-06-24 09:00:00,0.139471114,17.29999924,0.730361283,25.20000076,100.9540787,102.5390625,0.310000002,1,162,,-70,0.131648242,16.29999924,0.732233405,25.29999924,101.027359,60.42480469,0.280000001,1,144,,-35,,,,,,0,,,,,0,0.154766828,20,0.656970024,26.39999962,101.1152878,188.5986328,0.479999989,2.700000048,228,,15,20.4,0.176053343,101.1299463,0.571434236,28.4,587.7685547,214,3.1,0.75,,30
2016-06-24 10:00:00,0.139039591,17.29999924,0.629887581,28,100.9247665,164.7949219,0.25999999,0.899999976,183,,-70,0.131648242,16.29999924,0.643706441,27.70000076,100.9980469,65.91796875,0.289999992,1.100000024,199,,-35,,,,,,0,,,,,0,0.15434818,20,0.532761097,30,101.0713272,748.9013672,0.850000024,3.299999952,226,,15,20.8,0.176053343,101.0713239,0.503961051,30.5,703.125,220,3.5,0.96,,30
2016-06-24 11:00:00,0.138607711,17.29999924,0.553977251,30,100.9101105,281.9824219,0.340000004,1.200000048,161,,-70,0.131210178,16.39999962,0.560382724,29.79999924,100.9833908,148.3154297,0.319999993,1.100000024,161,,-35,,,,,,0,,,,,0,0.15434818,20.29999924,0.487770945,31.70000076,101.0566711,833.1298828,0.670000017,2.5,235,,15,21.6,0.176053343,101.0713239,0.463740413,31.8,794.6777344,223,3.2,0.88,,30
2016-06-24 12:00:00,0.138175473,17.39999962,0.485271424,31.39999962,100.8954544,274.6582031,0.319999993,1.200000048,180,,-70,0.131210178,16.5,0.48744753,31.39999962,100.9687347,148.3154297,0.349999994,1.100000024,182,,-35,,,,,,0,,,,,0,0.153929189,20.89999962,0.434254915,32.79999924,101.0420151,877.0751953,0.75999999,3.900000095,235,,15,22.7,0.176853337,101.0420127,0.415483016,33,847.7783203,225,3.3,0.87,,30
2016-06-24 13:00:00,0.137742862,17.60000038,0.416488379,32.70000076,100.8807983,126.3427734,0.330000013,1.100000024,194,,-70,0.131210178,16.70000076,0.4273431,32.5,100.9394226,140.9912109,0.379999995,1,188,,-35,,,,,,0,,,,,0,0.15350984,21.79999924,0.390205771,33.59999847,101.027359,867.9199219,0.910000026,3.799999952,233,,15,24,0.177252819,100.9980459,0.376363293,33.8,855.1025391,231,3.4,0.97,,30
2016-06-24 14:00:00,0.137309894,17.70000076,0.394599348,33.40000153,100.8514862,386.3525391,0.330000013,1.600000024,161,,-70,0.131210178,16.79999924,0.402980447,33.20000076,100.9101105,128.1738281,0.370000005,1.200000048,182,,-35,,,,,,0,,,,,0,0.153090134,22.79999924,0.364166647,34.29999924,101.0127029,820.3125,0.850000024,3,241,,15,25.3,0.177651959,100.9687347,0.352954585,34.4,822.1435547,231,3,0.92,,30
2016-06-24 15:00:00,0.136876568,17.89999962,0.383133739,33.29999924,100.7782135,150.1464844,0.360000014,1.399999976,237,,-70,0.131210178,17,0.385088503,33.29999924,100.8514862,150.1464844,0.360000014,1.299999952,196,,-35,,,,,,0,,,,,0,0.152670071,24,0.337927818,34.90000153,100.9247665,737.9150391,0.860000014,2.5,241,,15,26.3,0.177651959,100.9101124,0.323623993,34.9,754.3945313,234,3.2,0.99,,30
2016-06-24 16:00:00,0.13644287,18.10000038,0.385480374,33.09999847,100.7195892,80.56640625,0.370000005,0.899999976,271,,-70,0.130771756,17.10000038,0.381357104,33.20000076,100.7782135,93.38378906,0.439999998,1.5,214,,-35,,,,,,0,,,,,0,0.152249649,25,0.316539377,35.29999924,100.8661423,624.3896484,0.769999981,3.099999905,260,,15,26.7,0.177651959,100.8368344,0.300955572,35.5,655.5175781,243,3,0.7,,30
2016-06-24 17:00:00,0.136008814,18.29999924,0.418510169,32.70000076,100.675621,155.6396484,0.319999993,1.299999952,43,,-70,0.130771756,17.29999924,0.420531958,32.70000076,100.7342453,106.2011719,0.289999992,1.299999952,96,,-35,,,,,,0,,,,,0,0.151407763,25.39999962,0.369571507,35.09999847,100.8075256,472.4121094,0.680000007,3.299999952,3,,15,26.7,0.177252819,100.7928676,0.351888647,35.1,512.6953125,34,2.9,0.63,,30
2016-06-24 18:00:00,0.135574386,18.39999962,0.523917973,30.89999962,100.6463089,36.62109375,0.25,0.899999976,106,,-70,0.130771756,17.39999962,0.503358722,31.29999924,100.7195892,34.79003906,0.270000011,0.800000012,114,,-35,,,,,,0,,,,,0,0.150564432,25.39999962,0.397339731,34.79999924,100.7635574,322.265625,0.400000006,2.5,9,,15,26.6,0.176853337,100.7635564,0.377855163,34.7,360.7177734,46,2.6,0.38,,30
2016-06-24 19:00:00,0.135139614,18.60000038,0.610780239,29.10000038,100.6463089,14.6484375,0.289999992,0.699999988,97,,-70,0.130332962,17.39999962,0.601688325,29.5,100.7342453,36.62109375,0.300000012,1,96,,-35,,,,,,0,,,,,0,0.150142252,25.29999924,0.524349213,32.40000153,100.7782135,175.78125,0.230000004,1,50,,15,26.3,0.176053343,100.8075232,0.493505146,32.4,210.5712891,88,1.5,0.3,,30
2016-06-24 20:00:00,0.135139614,18.70000076,0.701651335,27.20000076,100.6316528,1.831054688,0.25,0.600000024,93,,-70,0.130332962,17.5,0.705821395,27.29999924,100.7049332,3.662109375,0.159999996,0.600000024,85,,-35,,,,,,0,,,,,0,0.1497197,25,0.665792882,28.29999924,100.7342453,32.95898438,0.219999999,1.299999952,43,,15,25.9,0.176053343,100.8075232,0.649004494,28.4,40.28320313,88,1.4,0.23,,30
2016-06-24 21:00:00,0.134704471,18.70000076,0.705952346,25.70000076,100.6169968,0,0.360000014,0.899999976,99,,-70,0.130332962,17.60000038,0.729712129,25.5,100.6902771,0,0.230000004,0.699999988,74,,-35,,,,,,0,,,,,0,0.14929679,24.70000076,0.739724874,25.20000076,100.7195892,0,0.280000001,1,42,,15,25.4,0.175652831,100.8075232,0.72724008,25.2,0,72,0.5,0.26,,30
2016-06-24 22:00:00,0.134704471,18.79999924,0.707529366,25,100.6463089,0,0.200000003,0.899999976,130,,-70,0.12989381,17.60000038,0.734335959,24.60000038,100.7195892,0,0.159999996,0.600000024,204,,-35,,,,,,0,,,,,0,0.14929679,24.29999924,0.744456589,24,100.7635574,0,0.200000003,1.299999952,278,,15,24.9,0.174850778,100.85149,0.729999725,24.1,0,,,,,30
2016-06-24 23:00:00,0.134268954,18.70000076,0.724802792,23.60000038,100.660965,0,0.579999983,1.700000048,236,,-70,0.130332962,17.5,0.737073183,23.39999962,100.7342453,0,0.579999983,1.600000024,237,,-35,,,,,,0,,,,,0,0.148873523,23.79999924,0.748943686,22.89999962,100.7635574,0,0.579999983,2.400000095,228,,15,24.4,0.174449235,100.85149,0.73285155,23.1,0,,,,,30
2016-06-25 00:00:00,0.133833081,18.70000076,0.750824451,22.70000076,100.6463089,0,0.400000006,1.100000024,89,,-70,0.12989381,17.5,0.762693346,22.60000038,100.7342453,0,0.460000008,1.399999976,86,,-35,,,,,,0,,,,,0,0.148449913,23.39999962,0.788277805,21.89999962,100.7635574,0,0.400000006,1.799999952,116,,15,24,0.174449235,100.85149,0.794111573,21.7,0,,,,,30
2016-06-25 01:00:00,0.133833081,18.70000076,0.789274096,21.79999924,100.6023483,0,0.409999996,1,43,,-70,0.12989381,17.5,0.806739509,21.60000038,100.7049332,0,0.5,1,26,,-35,,,,,,0,,,,,0,0.148449913,23.10000038,0.854838371,20.5,100.7195892,0,0.639999986,1.600000024,23,,15,23.5,0.173645118,100.8221788,0.850688699,20.5,0,,,,,30
2016-06-25 02:00:00,0.133833081,18.60000038,0.860130131,20.39999962,100.5583801,0,0.419999987,1.200000048,352,,-70,0.12989381,17.39999962,0.879279017,20.20000076,100.6463089,0,0.519999981,1.5,338,,-35,,,,,,0,,,,,0,0.14802593,22.70000076,0.908201993,19.60000038,100.675621,0,0.50999999,2.799999952,12,,15,23.1,0.172839623,100.778212,0.896997617,19.8,0,,,,,30
2016-06-25 03:00:00,0.133396849,18.5,0.896997631,19.79999924,100.4850998,0,0.289999992,0.699999988,313,,-70,0.129454285,17.39999962,0.9143309,19.79999924,100.5730362,0,0.340000004,1.100000024,297,,-35,,,,,,0,,,,,0,0.14802593,22.39999962,0.909997582,19.79999924,100.6169968,0,0.649999976,2.099999905,1,,15,22.8,0.172839623,100.7195896,0.89878814,20,0,,,,,30
2016-06-25 04:00:00,0.133396849,18.39999962,0.905033529,19.5,100.4264755,0,0.349999994,1.100000024,351,,-70,0.129454285,17.29999924,0.924006224,19.39999962,100.5144119,0,0.319999993,1.299999952,337,,-35,,,,,,0,,,,,0,0.14802593,22.10000038,0.908201993,19.60000038,100.5583801,0,0.769999981,2.299999952,15,,15,22.5,0.172839623,100.6609673,0.892664296,19.8,0,,,,,30
2016-06-25 05:00:00,0.133396849,18.39999962,0.883997679,19.79999924,100.3678589,0,0.49000001,1.100000024,310,,-70,0.129014403,17.20000076,0.906940579,19.70000076,100.4850998,0,0.50999999,1.299999952,299,,-35,,,,,,0,,,,,0,0.14802593,21.89999962,0.888330996,19.79999924,100.4997559,12.81738281,1.00999999,3.400000095,4,,15,22.2,0.172839623,100.6023449,0.871974008,20.1,16.47949219,,,,,30
2016-06-25 06:00:00,0.132960245,18.29999924,0.892664313,19.79999924,100.3385468,7.32421875,0.579999983,1.299999952,285,,-70,0.129014403,17.20000076,0.908679903,19.89999962,100.4557877,5.493164063,0.579999983,1.299999952,286,,-35,,,,,,0,,,,,0,0.147601604,21.70000076,0.900066793,19.89999962,100.4850998,29.296875,0.810000002,2.599999905,4,,15,22,0.172032749,100.5876893,0.888988135,20.1,38.45214844,,,,,30
2016-06-25 07:00:00,0.132960245,18.20000076,0.846812904,21.5,100.3238907,27.46582031,0.310000002,1,279,,-70,0.128574133,17.10000038,0.857160747,21.60000038,100.4118195,21.97265625,0.389999986,1,299,,-35,,,,,,0,,,,,0,0.147601604,21.5,0.81389159,22.29999924,100.4704437,164.7949219,0.649999976,2.799999952,3,,15,21.8,0.171628794,100.5437225,0.783602763,23,201.4160156,,,,,30
2016-06-25 08:00:00,0.132523268,18.10000038,0.811492264,23.29999924,100.2945786,43.9453125,0.349999994,1,319,,-70,0.128574133,17,0.818487883,23.29999924,100.3825073,71.41113281,0.400000006,1.200000048,315,,-35,,,,,,0,,,,,0,0.147601604,21.39999962,0.736390829,24.70000076,100.4411316,150.1464844,1.210000038,3.900000095,11,,15,21.7,0.171628794,100.4851001,0.680550129,26.1,411.9873047,,,,,30
2016-06-25 09:00:00,0.132085949,18,0.755650878,25.39999962,100.2652664,87.890625,0.389999986,1.299999952,342,,-70,0.12813352,17,0.766362906,25.29999924,100.3678589,62.25585938,0.340000004,1.100000024,313,,-35,,,,,,0,,,,,0,0.147176906,21.5,0.704721153,26.29999924,100.3971634,232.5439453,1.210000038,3.599999905,11,,15,21.8,0.171628794,100.455789,0.654003167,27.5,523.6816406,,,,,30
2016-06-25 10:00:00,0.132085949,18,0.704371333,27.60000038,100.2359543,140.9912109,0.400000006,1.399999976,0,,-70,0.12813352,17,0.718144894,27.39999962,100.3238907,73.2421875,0.370000005,1.299999952,328,,-35,,,,,,0,,,,,0,0.147176906,21.5,0.628305912,29.29999924,100.3825073,662.8417969,0.709999979,3.700000048,355,,15,22.2,0.171628794,100.4118222,0.596151823,29.8,646.3623047,,,,,30
2016-06-25 11:00:00,0.131648242,18.10000038,0.637966216,29.70000076,100.17733,216.0644531,0.360000014,1.299999952,1,,-70,0.12813352,17.10000038,0.646475136,29.60000038,100.2652664,128.1738281,0.370000005,1.200000048,156,,-35,,,,,,0,,,,,0,0.146751866,21.89999962,0.572315633,31.39999962,100.3385468,756.2255859,0.579999983,2.700000048,293,,15,22.9,0.172032749,100.3385442,0.550957646,31.8,732.421875,,,,,30
2016-06-25 12:00:00,0.131210178,18.20000076,0.572315633,31.39999962,100.1040573,241.6992188,0.330000013,1.5,80,,-70,0.127692536,17.20000076,0.576667845,31.39999962,100.17733,130.0048828,0.349999994,1.399999976,99,,-35,,,,,,0,,,,,0,0.146326452,22.39999962,0.50692904,33,100.2506104,719.6044922,0.629999995,3.900000095,266,,15,24,0.172839623,100.2506106,0.480128287,33.4,723.2666016,,,,,30
2016-06-25 13:00:00,0.130771756,18.29999924,0.547844589,31.89999962,100.0161209,130.0048828,0.319999993,1.600000024,111,,-70,0.127692536,17.29999924,0.55308491,31.79999924,100.0747452,139.1601563,0.319999993,1.5,118,,-35,,,,,,0,,,,,0,0.145900697,23.10000038,0.487111807,33.5,100.1480179,615.234375,0.540000021,3.400000095,271,,15,25,0.172839623,100.1480215,0.45619793,33.8,618.8964844,,,,,30
2016-06-25 14:00:00,0.130771756,18.39999962,0.525488853,32.5,99.88422394,219.7265625,0.300000012,1,277,,-70,0.127692536,17.5,0.532385111,32.20000076,99.94284058,108.0322266,0.379999995,1.200000048,240,,-35,,,,,,0,,,,,0,0.145474568,23.89999962,0.480549008,33.59999847,100.0161209,494.3847656,0.720000029,4.099999905,233,,15,25.9,0.172839623,100.0161212,0.45999958,33.8,503.5400391,,,,,30
2016-06-25 15:00:00,0.130332962,18.60000038,0.597847879,29.39999962,99.88422394,78.73535156,0.519999981,1.399999976,128,,-70,0.127251178,17.60000038,0.60654062,29.5,99.97215271,87.890625,0.5,1.5,108,,-35,,,,,,0,,,,,0,0.145048082,24.70000076,0.564219356,30.89999962,100.0161209,406.4941406,0.379999995,4,276,,15,26.5,0.173242543,100.0454323,0.531258867,31.1,419.3115234,,,,,30
2016-06-25 16:00:00,0.12989381,18.79999924,0.592533112,27.70000076,99.86956787,62.25585938,0.589999974,1.799999952,136,,-70,0.127251178,17.70000076,0.597115457,27.79999924,99.95749664,65.91796875,0.469999999,1.700000048,116,,-35,,,,,,0,,,,,0,0.144621253,25,0.56084758,28.79999924,100.0014648,318.6035156,0.589999974,4.699999809,261,,15,26.5,0.172839623,100.0307767,0.540636834,28.8,333.2519531,,,,,30
2016-06-25 17:00:00,0.129454285,18.89999962,0.691865921,25.60000038,99.89888,23.80371094,0.75,1.899999976,4,,-70,0.127251178,17.79999924,0.693832994,25.70000076,99.98680878,23.80371094,0.769999981,3,338,,-35,,,,,,0,,,,,0,0.144194052,25.10000038,0.676675498,25.89999962,100.030777,117.1875,1.50999999,5.5,8,,15,26.4,0.172839623,100.0747435,0.660775847,26,122.6806641,,,,,30
2016-06-25 18:00:00,0.129454285,19,0.796939552,23.60000038,99.92818451,14.6484375,0.649999976,1.899999976,67,0.3,-70,0.126809448,17.89999962,0.798983037,23.70000076,100.0161209,14.6484375,0.649999976,2,64,0.25,-35,,,,,,0,,,,,0,0.144194052,24.89999962,0.794188917,23.79999924,100.030777,76.90429688,1.029999971,5,12,1.4,15,26,0.172839623,100.1187103,0.784006986,23.8,82.39746094,,,,0.8,30
2016-06-25 19:00:00,0.129014403,19,0.920957804,21.5,99.97215271,9.155273438,0.319999993,0.800000012,1,,-70,0.126809448,17.89999962,0.942488968,21.60000038,100.045433,10.98632813,0.370000005,0.899999976,347,0.05,-35,,,,,,0,,,,,0,0.145048082,24.60000038,0.914151073,22.10000038,100.0894012,60.42480469,0.439999998,1.399999976,18,,15,25.5,0.171628794,100.1919883,0.902865228,22.1,65.91796875,,,,,30
2016-06-25 20:00:00,0.129454285,19,0.9420228,21.20000076,99.98680878,1.831054688,0.280000001,0.899999976,91,0.45,-70,0.126809448,17.89999962,0.973821044,21.20000076,100.0600891,1.831054688,0.310000002,1.200000048,117,0.35,-35,,,,,,0,,,,,0,0.145048082,24.20000076,0.948274374,21.5,100.1187134,12.81738281,0.340000004,1,72,4,15,25.1,0.171224493,100.2066439,0.938610424,21.6,14.6484375,,,,,30
2016-06-25 21:00:00,0.130332962,19,0.965060592,20.60000038,100.0014648,0,0.310000002,0.800000012,46,0.05,-70,0.126809448,17.89999962,0.996022046,20.70000076,100.045433,0,0.349999994,1,25,0.05,-35,,,,,,0,,,,,0,0.145048082,23.89999962,0.983725488,20.70000076,100.1187134,0,0.270000011,0.899999976,72,,15,24.6,0.171224493,100.2066439,0.975527746,20.7,0,,,,,30
2016-06-25 22:00:00,0.12989381,19,0.978892624,20.29999924,100.0600891,0,0.239999995,0.5,102,,-70,0.126809448,17.79999924,1.008301377,20.29999924,100.1187134,0,0.25,0.699999988,124,,-35,,,,,,0,,,,,0,0.144621253,23.5,0.995697618,20.29999924,100.1919861,0,0.300000012,0.600000024,100,,15,24.2,0.171224493,100.2652662,0.993416204,20.2,0,,,,,30
2016-06-25 23:00:00,0.12989381,18.89999962,0.980734289,20.20000076,100.1333694,0,0.239999995,0.5,162,,-70,0.126809448,17.70000076,1.014552712,20.20000076,100.1919861,0,0.310000002,0.800000012,157,,-35,,,,,,0,,,,,0,0.144194052,23.20000076,1.003833532,20.10000038,100.2652664,0,0.289999992,0.800000012,137,,15,23.8,0.170009517,100.3238886,0.999579961,20.1,0,,,,,30
2016-06-26 00:00:00,0.12989381,18.79999924,0.980107069,20,100.0894012,0,0.280000001,0.600000024,163,,-70,0.12636736,17.70000076,1.012340546,20.10000038,100.1480179,0,0.349999994,0.699999988,158,,-35,,,,,,0,,,,,0,0.144194052,22.89999962,1.005786777,20,100.2506104,0,0.389999986,1,131,,15,23.4,0.170009517,100.2945774,1.00342376,19.9,0,,,,,30
2016-06-26 01:00:00,0.129454285,18.70000076,0.979330719,19.79999924,100.1040573,0,0.529999971,1.600000024,244,0.05,-70,0.12636736,17.60000038,1.0120368,19.89999962,100.162674,0,0.589999974,2.299999952,241,,-35,,,,,,0,,,,,0,0.144194052,22.70000076,1.00342381,19.89999962,100.2506104,0,0.670000017,3.900000095,198,,15,23.1,0.169603833,100.309233,0.999117221,19.9,0,,,,,30
2016-06-26 02:00:00,0.129454285,18.60000038,0.958707333,20,100.1919861,0,0.50999999,1.200000048,268,0.05,-70,0.12636736,17.60000038,0.984961569,20.20000076,100.2799225,0,0.610000014,1.700000048,255,0.05,-35,,,,,,0,,,,,0,0.143766493,22.39999962,0.968052387,20.20000076,100.3238907,0,1.039999962,3,221,0.8,15,22.8,0.169603833,100.3971666,0.968052386,20.2,0,,,,,30
2016-06-26 03:00:00,0.12989381,18.5,0.966840684,19.5,100.2652664,0,0.670000017,3,271,0.65,-70,0.12636736,17.5,0.995950997,19.60000038,100.3532028,0,0.810000002,4.099999905,257,0.6,-35,,,,,,0,,,,,0,0.144194052,22.29999924,0.976705253,19.70000076,100.3971634,0,1.139999986,6.300000191,223,3.8,15,22.6,0.169197802,100.4851001,0.972344937,19.7,0,,,,,30
2016-06-26 04:00:00,0.130771756,18.5,0.948735714,17.70000076,100.2799225,0,1.549999952,2.900000095,289,0.3,-70,0.12636736,17.39999962,0.977148831,17.79999924,100.3678589,0,2.170000076,4.900000095,276,0.15,-35,,,,,,0,,,,,0,0.144621253,22.10000038,0.961257219,17.89999962,100.4264755,0,1.529999971,4.900000095,268,1,15,22.4,0.168791424,100.5144113,0.962417943,17.8,0,,,,,30
2016-06-26 05:00:00,0.130771756,18.39999962,0.945571125,16.20000076,100.3825073,0,1.440000057,2.5,298,,-70,0.12636736,17.39999962,0.960424781,16.39999962,100.4704437,0,2.299999952,4.800000191,284,,-35,,,,,,0,,,,,0,0.144194052,21.89999962,0.95505929,16.39999962,100.5144119,7.32421875,1.5,4.300000191,291,0.2,15,22.1,0.1683847,100.6023449,0.955059304,16.4,9.155273438,,,,,30
2016-06-26 06:00:00,0.130332962,18.29999924,0.932303548,15.39999962,100.5144119,1.831054688,1.360000014,2.799999952,297,,-70,0.12636736,17.29999924,0.954758048,15.5,100.6023483,1.831054688,2.039999962,4.699999809,282,,-35,,,,,,0,,,,,0,0.144194052,21.60000038,0.943011522,15.60000038,100.6463089,16.47949219,1.309999943,4.800000191,284,,15,21.8,0.1683847,100.7635564,0.949074957,15.5,20.14160156,,,,,30
2016-06-26 07:00:00,0.130332962,18.20000076,0.938975334,15,100.5730362,7.32421875,1.450000048,2.5,296,,-70,0.12636736,17.29999924,0.962107837,15.10000038,100.675621,9.155273438,2.24000001,3.900000095,280,,-35,,,,,,0,,,,,0,0.144194052,21.29999924,0.955942035,15.19999981,100.7195892,51.26953125,1.350000024,4,283,0.2,15,21.5,0.167977628,100.8221788,0.955942017,15.2,58.59375,,,,,30
2016-06-26 08:00:00,0.12989381,18.10000038,0.926583886,15.39999962,100.6023483,18.31054688,1.210000038,2.200000048,290,0.05,-70,0.12636736,17.20000076,0.94339186,15.5,100.7195892,20.14160156,1.74000001,3.200000048,276,,-35,,,,,,0,,,,,0,0.143766493,21.10000038,0.931014597,15.80000019,100.7635574,100.7080078,1.230000019,4.400000095,273,,15,21.2,0.1683847,100.8661456,0.931380805,15.7,115.3564453,,,,,30
2016-06-26 09:00:00,0.129454285,18,0.902400672,16.10000038,100.660965,40.28320313,1.360000014,3,290,,-70,0.12636736,17.10000038,0.912965178,16.20000076,100.7635574,42.11425781,1.950000048,4.400000095,277,,-35,,,,,,0,,,,,0,0.143338576,20.89999962,0.890007377,16.60000038,100.8221817,190.4296875,1.549999952,4.800000191,265,,15,21.1,0.1683847,100.924768,0.889633733,16.7,216.0644531,,,,,30
2016-06-26 10:00:00,0.129014403,17.89999962,0.841871142,17,100.7489014,67.74902344,1.429999948,2.900000095,295,,-70,0.12636736,17,0.846819222,17.10000038,100.8368378,65.91796875,2.160000086,4.699999809,280,,-35,,,,,,0,,,,,0,0.142910302,20.79999924,0.8049137,18,100.8954544,314.9414063,1.470000029,5.400000095,278,,15,21,0.1683847,100.9833903,0.804913712,18,333.2519531,,,,,30
2016-06-26 11:00:00,0.129454285,17.79999924,0.766131401,18.20000076,100.7928696,78.73535156,1.340000033,2.599999905,288,,-70,0.12636736,17,0.761337876,18.29999924,100.8954544,80.56640625,1.960000038,3.799999952,276,,-35,,,,,,0,,,,,0,0.142052665,20.79999924,0.719681382,19.29999924,100.9394226,355.2246094,1.529999971,4.800000191,267,,15,21.1,0.1683847,101.0127015,0.71521636,19.4,364.3798828,,,,,30
2016-06-26 12:00:00,0.129014403,17.70000076,0.679677665,19.39999962,100.8075256,131.8359375,1.360000014,3.200000048,292,,-70,0.12636736,16.89999962,0.658117414,19.60000038,100.9101105,104.3701172,2.200000048,5.199999809,282,,-35,,,,,,0,,,,,0,0.141623303,21,0.61512816,20.79999924,100.9833908,547.4853516,1.710000038,5.400000095,276,,15,21.3,0.1683847,101.0273571,0.615128173,20.8,551.1474609,,,,,30
2016-06-26 13:00:00,0.129014403,17.70000076,0.645980954,19.89999962,100.8075256,106.2011719,1.350000024,3,287,,-70,0.12636736,16.89999962,0.629522681,20.10000038,100.9101105,113.5253906,2.029999971,3.799999952,278,,-35,,,,,,0,,,,,0,0.141193599,21.20000076,0.577171445,21.39999962,100.9833908,476.0742188,1.690000057,7.199999809,260,,15,21.7,0.1683847,101.0273571,0.584670229,21.3,488.8916016,,,,,30
2016-06-26 14:00:00,0.128574133,17.70000076,0.601706624,20.5,100.7928696,212.4023438,1.419999957,2.700000048,293,,-70,0.12636736,16.89999962,0.589759231,20.60000038,100.8954544,84.22851563,2.24000001,4.800000191,281,,-35,,,,,,0,,,,,0,0.140763521,21.5,0.548367202,21.89999962,100.9687347,596.9238281,1.659999967,4.599999905,275,,15,22.1,0.169197802,101.0127015,0.54836718,21.9,604.2480469,,,,,30
2016-06-26 15:00:00,0.128574133,17.70000076,0.524905562,21.79999924,100.7489014,130.0048828,1.25,2.700000048,283,,-70,0.12636736,16.89999962,0.50718236,22,100.8661423,117.1875,1.799999952,4,274,,-35,,,,,,0,,,,,0,0.140763521,22,0.463084102,23.5,100.9394226,639.0380859,1.679999948,4.699999809,252,,15,22.5,0.169603833,100.9687347,0.460301294,23.6,650.0244141,,,,,30
2016-06-26 16:00:00,0.12813352,17.70000076,0.509579897,21.79999924,100.7489014,62.25585938,1.159999967,2.599999905,295,,-70,0.12636736,17,0.489051998,22.10000038,100.8514862,76.90429688,1.870000005,4,282,,-35,,,,,,0,,,,,0,0.140763521,22.60000038,0.4582133,23.29999924,100.9247665,476.0742188,1.419999957,4.5,281,,15,22.8,0.169603833,100.9540791,0.451978844,23.4,494.3847656,,,,,30
2016-06-26 17:00:00,0.127692536,17.79999924,0.484472662,22,100.7342453,95.21484375,1.25,2.799999952,293,,-70,0.12636736,17,0.464550018,22.29999924,100.8514862,89.72167969,2,4.5,279,,-35,,,,,,0,,,,,0,0.140333071,22.70000076,0.438893169,23.5,100.9247665,419.3115234,1.549999952,5,266,,15,22.9,0.169603833,100.9540791,0.43282062,23.6,448.6083984,,,,,30
2016-06-26 18:00:00,0.127692536,17.79999924,0.472205073,21.89999962,100.7342453,32.95898438,1.059999943,2.799999952,293,,-70,0.12636736,17,0.45340082,22.29999924,100.8368378,42.11425781,1.799999952,4.300000191,278,,-35,,,,,,0,,,,,0,0.139902279,22.60000038,0.422515363,23.60000038,100.9101105,305.7861328,1.299999952,4,277,,15,22.7,0.169603833,100.9394235,0.422515367,23.6,340.5761719,,,,,30
2016-06-26 19:00:00,0.127251178,17.79999924,0.514350057,21.39999962,100.7195892,14.6484375,0.639999986,1.799999952,310,,-70,0.12636736,17,0.491245598,21.89999962,100.8368378,40.28320313,1.149999976,2.700000048,291,,-35,,,,,,0,,,,,0,0.139039591,22.39999962,0.423392713,23.70000076,100.9101105,188.5986328,0.800000012,2.799999952,302,,15,22.5,0.169603833,100.924768,0.422515367,23.6,223.3886719,,,,,30
2016-06-26 20:00:00,0.127251178,17.79999924,0.669866145,19.10000038,100.7489014,3.662109375,0.360000014,0.5,104,,-70,0.12636736,17,0.65339005,19.5,100.8368378,10.98632813,0.479999989,0.800000012,80,,-35,,,,,,0,,,,,0,0.139039591,22.20000076,0.581452191,21.5,100.9101105,69.58007813,0.409999996,0.800000012,107,,15,22.2,0.169197802,100.9540791,0.581097759,21.4,86.05957031,,,,,30
2016-06-26 21:00:00,0.127251178,17.79999924,0.754068613,17,100.7782135,0,0.540000021,0.800000012,108,,-70,0.12636736,17,0.749678373,17.20000076,100.8661423,0,0.649999976,1,93,,-35,,,,,,0,,,,,0,0.138607711,21.89999962,0.744951546,17.29999924,100.8954544,5.493164063,0.600000024,0.899999976,106,,15,21.8,0.168791424,100.9980459,0.764398321,17,5.493164063,,,,,30
2016-06-26 22:00:00,0.127251178,17.70000076,0.772153199,15.39999962,100.8075256,0,0.610000014,0.899999976,116,,-70,0.12636736,17,0.778582454,15.5,100.9101105,0,0.579999983,1,98,,-35,,,,,,0,,,,,0,0.138607711,21.5,0.777125835,15.30000019,100.9394226,0,0.649999976,1.299999952,105,,15,21.4,0.1683847,101.0273571,0.80919157,14.9,0,,,,,30
2016-06-26 23:00:00,0.127251178,17.70000076,0.818225026,14.5,100.8075256,0,0.460000008,1,162,,-70,0.12636736,16.89999962,0.824285924,14.5,100.9101105,0,0.419999987,0.699999988,134,,-35,,,,,,0,,,,,0,0.138607711,21.10000038,0.845147371,14,100.9247665,0,0.379999995,0.800000012,134,,15,21,0.1683847,101.0273571,0.873826291,13.6,0,,,,,30
2016-06-27 00:00:00,0.127251178,17.60000038,0.837166667,13.80000019,100.7782135,0,0.469999999,0.800000012,161,,-70,0.12636736,16.79999924,0.850650191,13.89999962,100.8807983,0,0.439999998,0.800000012,133,,-35,,,,,,0,,,,,0,0.138175473,20.70000076,0.8665995,13.5,100.8954544,0,0.389999986,0.699999988,122,,15,20.5,0.1683847,101.0127015,0.866599477,13.5,0,,,,,30
2016-06-27 01:00:00,0.127251178,17.5,0.877123773,13.19999981,100.7782135,0,0.479999989,1.299999952,154,,-70,0.12636736,16.79999924,0.896147192,13.10000038,100.8807983,0,0.529999971,1.600000024,129,,-35,,,,,,0,,,,,0,0.138175473,20.29999924,0.912247002,12.60000038,100.8954544,0,0.5,1.5,129,,15,20.1,0.1683847,101.0127015,0.924302754,12.4,0,,,,,30
2016-06-27 02:00:00,0.126809448,17.39999962,0.890313625,13.19999981,100.7635574,0,0.540000021,0.899999976,157,,-70,0.12636736,16.70000076,0.903503478,13.19999981,100.8661423,0,0.529999971,0.899999976,128,,-35,,,,,,0,,,,,0,0.138175473,20,0.938965201,12.5,100.8807983,0,0.349999994,1.700000048,149,,15,19.8,0.1683847,100.9980459,0.938202043,12.4,0,,,,,30
2016-06-27 03:00:00,0.127251178,17.20000076,0.897626579,13.30000019,100.7489014,0,0.519999981,1.299999952,159,,-70,0.12636736,16.60000038,0.91073066,13.30000019,100.8514862,0,0.50999999,1.299999952,131,,-35,,,,,,0,,,,,0,0.137742862,19.70000076,0.945869327,12.5,100.8807983,0,0.449999988,1.600000024,173,,15,19.4,0.1683847,100.9980459,0.932824009,12.6,0,,,,,30
2016-06-27 04:00:00,0.126809448,17.10000038,0.907136798,12.80000019,100.7782135,0,0.300000012,0.600000024,135,,-70,0.12636736,16.5,0.927445829,12.80000019,100.8807983,0,0.349999994,0.899999976,108,,-35,,,,,,0,,,,,0,0.137742862,19.39999962,0.963223398,12,100.8954544,0,0.239999995,0.699999988,116,,15,19.1,0.167977628,100.9980459,0.975202451,11.7,0,,,,,30
2016-06-27 05:00:00,0.126809448,17,0.912247002,12.60000038,100.8075256,0,0.289999992,0.600000024,130,,-70,0.12636736,16.39999962,0.926727772,12.69999981,100.9101105,0,0.340000004,0.800000012,102,,-35,,,,,,0,,,,,0,0.137742862,19.20000076,0.945151687,12.39999962,100.9540787,14.6484375,0.370000005,0.699999988,106,,15,18.8,0.167977628,101.0420127,0.970358378,12,16.47949219,,,,,30
2016-06-27 06:00:00,0.126809448,16.89999962,0.917282641,13.30000019,100.8221817,16.47949219,0.170000002,0.400000006,136,,-70,0.1259249,16.29999924,0.937358618,13.39999962,100.9247665,14.6484375,0.209999993,1,90,,-35,,,,,,0,,,,,0,0.137309894,19,0.919614911,13.80000019,100.9687347,75.07324219,0.280000001,0.899999976,122,,15,18.6,0.167570209,101.0566683,0.932299264,13.8,87.890625,,,,,30
2016-06-27 07:00:00,0.126809448,16.79999924,0.874986112,15.30000019,100.8075256,27.46582031,0.310000002,1,285,,-70,0.1259249,16.20000076,0.880877972,15.5,100.9101105,29.296875,0.409999996,1.200000048,281,,-35,,,,,,0,,,,,0,0.137309894,18.79999924,0.858647943,16.10000038,100.9540787,142.8222656,0.419999987,1.600000024,283,,15,18.4,0.167570209,101.0420127,0.853178838,16.1,153.8085938,,,,,30
2016-06-27 08:00:00,0.12636736,16.70000076,0.794879854,16.70000076,100.8514862,43.9453125,0.699999988,1.399999976,286,,-70,0.1259249,16.10000038,0.79507935,16.79999924,100.9394226,43.9453125,1.070000052,2.5,274,,-35,,,,,,0,,,,,0,0.137742862,18.79999924,0.765436947,17.39999962,100.9833908,206.9091797,1.029999971,2.799999952,263,,15,18.5,0.167570209,101.0859795,0.760618165,17.5,227.0507813,,,,,30
2016-06-27 09:00:00,0.12636736,16.60000038,0.760154605,17.29999924,100.9101105,60.42480469,1.019999981,2.200000048,288,,-70,0.1259249,16.10000038,0.755365431,17.39999962,100.9980469,62.25585938,1.590000033,3.099999905,275,,-35,,,,,,0,,,,,0,0.137309894,19,0.713754237,18.29999924,101.0566711,285.6445313,1.269999981,3.400000095,261,,15,18.7,0.167570209,101.1299463,0.709291872,18.4,305.7861328,,,,,30
2016-06-27 10:00:00,0.1259249,16.60000038,0.693862915,18.10000038,100.9247665,78.73535156,1.200000048,2.400000095,289,,-70,0.125482067,16.10000038,0.680445731,18.29999924,101.0127029,78.73535156,1.789999962,3.299999952,278,,-35,,,,,,0,,,,,0,0.137309894,19.20000076,0.643690169,19.29999924,101.0859833,357.0556641,1.480000019,4.300000191,268,,15,19,0.167570209,101.1446019,0.635254282,19.4,377.1972656,,,,,30
2016-06-27 11:00:00,0.1259249,16.60000038,0.659471214,18.79999924,100.9394226,113.5253906,0.930000007,2.099999905,278,,-70,0.125482067,16.10000038,0.646198094,18.89999962,101.027359,108.0322266,1.230000019,3.200000048,269,,-35,,,,,,0,,,,,0,0.137309894,19.39999962,0.600277007,20.20000076,101.1006317,560.3027344,1.389999986,3.799999952,248,,15,19.4,0.167570209,101.1446019,0.589759234,20.6,565.7958984,,,,,30
2016-06-27 12:00:00,0.125482067,16.60000038,0.579773307,20.29999924,100.9101105,201.4160156,0.860000014,2.099999905,280,,-70,0.125482067,16.10000038,0.567169547,20.29999924,100.9980469,135.4980469,1.25999999,4.099999905,270,,-35,,,,,,0,,,,,0,0.137309894,19.70000076,0.521710455,21.89999962,101.0713272,732.421875,1.629999995,5.599999905,237,,15,20,0.167977628,101.1152907,0.511623629,22.1,715.9423828,,,,,30
2016-06-27 13:00:00,0.125482067,16.70000076,0.530055404,21.39999962,100.8514862,111.6943359,1.019999981,2.299999952,285,,-70,0.125038877,16.20000076,0.526129067,21.39999962,100.9394226,113.5253906,1.529999971,3.400000095,274,,-35,,,,,,0,,,,,0,0.136876568,20.20000076,0.48604095,22.70000076,101.027359,714.1113281,1.610000014,5.199999809,251,,15,20.8,0.1683847,101.0566683,0.47728532,23,715.9423828,,,,,30
2016-06-27 14:00:00,0.125038877,16.79999924,0.510286152,21.89999962,100.8221817,212.4023438,1.100000024,2.5,287,,-70,0.125038877,16.20000076,0.499612451,22,100.9247665,122.6806641,1.649999976,4.300000191,275,,-35,,,,,,0,,,,,0,0.136876568,20.70000076,0.45893237,23.39999962,100.9980469,639.0380859,1.629999995,5.400000095,255,,15,21.7,0.1683847,101.0273571,0.452716561,23.5,664.6728516,,,,,30
2016-06-27 15:00:00,0.124595322,16.89999962,0.495053709,21.89999962,100.7928696,111.6943359,1.190000057,2.599999905,287,,-70,0.125038877,16.29999924,0.484472662,22,100.8954544,135.4980469,1.789999962,3.799999952,274,,-35,,,,,,0,,,,,0,0.13644287,21.5,0.451217681,23.29999924,100.9687347,598.7548828,1.559999943,4.199999809,257,,15,22.3,0.1683847,100.9980459,0.438893154,23.5,624.3896484,,,,,30
2016-06-27 16:00:00,0.124151386,17,0.468266398,22.29999924,100.7635574,67.74902344,0.99000001,2.299999952,289,,-70,0.125038877,16.39999962,0.456156313,22.60000038,100.8661423,86.05957031,1.639999986,4.199999809,275,,-35,,,,,,0,,,,,0,0.136008814,22,0.419176012,24,100.9394226,512.6953125,1.409999967,5.300000191,262,,15,22.5,0.1683847,100.9687347,0.41666651,24.1,541.9921875,,,,,30
2016-06-27 17:00:00,0.123707086,17.10000038,0.433598995,22.89999962,100.7489014,153.8085938,1.320000052,3.099999905,285,,-70,0.125038877,16.39999962,0.421301126,23.10000038,100.8514862,102.5390625,1.940000057,3.700000048,270,,-35,,,,,,0,,,,,0,0.135574386,22.20000076,0.391430169,24.60000038,100.9394226,488.8916016,1.529999971,5.599999905,251,,15,22.6,0.1683847,100.9540791,0.388195221,24.6,525.5126953,,,,,30
2016-06-27 18:00:00,0.123707086,17.20000076,0.456169128,22.20000076,100.7342453,34.79003906,0.910000026,2.299999952,292,,-70,0.124595322,16.5,0.44792065,22.5,100.8368378,32.95898438,1.419999957,3.799999952,277,,-35,,,,,,0,,,,,0,0.135139614,22.29999924,0.416563779,23.70000076,100.9101105,261.8408203,1.139999986,3.900000095,262,,15,22.5,0.1683847,100.9394235,0.419080283,23.6,291.1376953,,,,,30
2016-06-27 19:00:00,0.12326242,17.20000076,0.556469202,21.20000076,100.7342453,16.47949219,0.280000001,0.899999976,216,,-70,0.124595322,16.5,0.528122723,21.70000076,100.8514862,25.63476563,0.409999996,1.200000048,228,,-35,,,,,,0,,,,,0,0.134704471,22.10000038,0.465076268,22.79999924,100.9101105,140.9912109,0.810000002,2.700000048,216,,15,22.3,0.1683847,100.9540791,0.464277935,22.7,159.3017578,,,,,30
2016-06-27 20:00:00,0.12326242,17.29999924,0.614155769,20.5,100.7635574,7.32421875,0.200000003,0.5,138,,-70,0.124595322,16.60000038,0.562770724,20.89999962,100.8514862,10.98632813,0.319999993,0.800000012,111,,-35,,,,,,0,,,,,0,0.134268954,22,0.542428553,21.5,100.9247665,64.08691406,0.449999988,1.700000048,183,,15,22,0.167977628,100.9687347,0.542428542,21.5,73.2421875,,,,,30
2016-06-27 21:00:00,0.122817382,17.29999924,0.663102865,18.60000038,100.7635574,0,0.300000012,0.5,106,,-70,0.124595322,16.60000038,0.649685502,18.70000076,100.8514862,0,0.449999988,0.699999988,76,,-35,,,,,,0,,,,,0,0.134268954,21.70000076,0.63244921,18.89999962,100.8954544,7.32421875,0.479999989,1.200000048,104,,15,21.7,0.167570209,100.9687347,0.645044895,18.7,9.155273438,,,,,30
2016-06-27 22:00:00,0.122817382,17.29999924,0.677455366,17.10000038,100.7782135,0,0.419999987,0.699999988,123,,-70,0.124595322,16.60000038,0.67318058,17.20000076,100.8514862,0,0.449999988,0.899999976,102,,-35,,,,,,0,,,,,0,0.134268954,21.39999962,0.681760669,17,100.8954544,0,0.550000012,0.800000012,112,,15,21.3,0.167162443,100.9980459,0.709886839,16.6,0,,,,,30
2016-06-27 23:00:00,0.122817382,17.20000076,0.747041643,15.80000019,100.7928696,0,0.569999993,1.200000048,136,,-70,0.124595322,16.5,0.747819483,15.89999962,100.8807983,0,0.610000014,1.100000024,116,,-35,,,,,,0,,,,,0,0.133833081,21,0.778582454,15.5,100.9247665,0,0.540000021,1.399999976,132,,15,20.9,0.166754329,101.0127015,0.826312543,14.8,0,,,,,30
2016-06-28 00:00:00,0.122371979,17.20000076,0.779255033,15.60000038,100.7782135,0,0.600000024,1.100000024,131,,-70,0.124151386,16.5,0.779891133,15.69999981,100.8807983,0,0.689999998,1.5,112,,-35,,,,,,0,,,,,0,0.133833081,20.60000038,0.800151765,15.30000019,100.9101105,0,0.550000012,1.600000024,117,,15,20.5,0.166754329,100.9980459,0.810502981,15.1,0,,,,,30
2016-06-28 01:00:00,0.122371979,17.10000038,0.801743209,14.69999981,100.7782135,0,0.639999986,1.100000024,133,,-70,0.124151386,16.39999962,0.802533746,14.80000019,100.8807983,0,0.660000026,1.200000048,111,,-35,,,,,,0,,,,,0,0.133396849,20.29999924,0.828876853,14.30000019,100.8954544,0,0.529999971,1.200000048,121,,15,20.1,0.166754329,100.9980459,0.84514737,14,0,,,,,30
2016-06-28 02:00:00,0.122371979,17,0.837166667,13.80000019,100.7635574,0,0.569999993,1,139,,-70,0.124151386,16.39999962,0.849851012,13.80000019,100.8661423,0,0.579999983,1,118,,-35,,,,,,0,,,,,0,0.133396849,20,0.882870972,13.10000038,100.8661423,0,0.479999989,1.700000048,137,,15,19.8,0.166754329,100.9833903,0.905388009,12.6,0,,,,,30
2016-06-28 03:00:00,0.122371979,17,0.834263682,13.5,100.7489014,0,0.600000024,1.200000048,160,,-70,0.123707086,16.29999924,0.841700315,13.60000038,100.8514862,0,0.620000005,1.100000024,134,,-35,,,,,,0,,,,,0,0.133396849,19.70000076,0.857339025,13.19999981,100.8661423,0,0.629999995,1.299999952,139,,15,19.3,0.166345867,100.9833903,0.874315757,12.9,0,,,,,30
2016-06-28 04:00:00,0.122371979,16.79999924,0.847413719,12.89999962,100.7635574,0,0.620000005,1.200000048,155,,-70,0.123707086,16.20000076,0.855252028,13,100.8514862,0,0.649999976,1.399999976,132,,-35,,,,,,0,,,,,0,0.132960245,19.39999962,0.87795198,12.60000038,100.8661423,0,0.649999976,1.600000024,142,,15,19,0.165937056,100.9833903,0.88955453,12.4,0,,,,,30
2016-06-28 05:00:00,0.121926203,16.70000076,0.861933708,13,100.7635574,1.831054688,0.5,0.899999976,162,,-70,0.12326242,16.10000038,0.869594693,13.10000038,100.8661423,1.831054688,0.519999981,0.899999976,135,,-35,,,,,,0,,,,,0,0.132960245,19.10000038,0.876232803,13.10000038,100.8807983,21.97265625,0.50999999,1.100000024,136,,15,18.7,0.165527898,100.9833903,0.881978668,13,23.80371094,,,,,30
2016-06-28 06:00:00,0.121926203,16.60000038,0.870783865,14.10000038,100.7782135,9.155273438,0.319999993,0.699999988,167,,-70,0.12326242,16,0.884135306,14.30000019,100.8661423,10.98632813,0.379999995,0.800000012,138,,-35,,,,,,0,,,,,0,0.132960245,18.89999962,0.873175681,14.60000038,100.8954544,58.59375,0.310000002,1.200000048,139,,15,18.6,0.165527898,100.9980459,0.873175702,14.6,64.08691406,,,,,30
2016-06-28 07:00:00,0.121926203,16.60000038,0.909632385,15,100.7782135,21.97265625,0.270000011,0.699999988,169,,-70,0.12326242,16,0.927122116,15.10000038,100.8661423,23.80371094,0.330000013,0.699999988,148,,-35,,,,,,0,,,,,0,0.132960245,18.79999924,0.886304557,15.89999962,100.8954544,124.5117188,0.360000014,1.399999976,190,,15,18.5,0.165118391,100.9980459,0.880765181,15.9,135.4980469,,,,,30
2016-06-28 08:00:00,0.121926203,16.5,0.863696754,16.5,100.7782135,34.79003906,0.319999993,1,205,,-70,0.122817382,15.89999962,0.874114394,16.60000038,100.8661423,38.45214844,0.370000005,1.700000048,187,,-35,,,,,,0,,,,,0,0.132960245,18.79999924,0.826034725,17.29999924,100.9101105,175.78125,1.110000014,4,211,,15,18.6,0.165118391,101.0127015,0.82083041,17.4,212.4023438,,,,,30
2016-06-28 09:00:00,0.121480055,16.39999962,0.794406891,18.39999962,100.7928696,73.2421875,0.910000026,2.400000095,277,,-70,0.122817382,15.89999962,0.7941432,18.5,100.8807983,65.91796875,1.230000019,3,263,,-35,,,,,,0,,,,,0,0.132960245,18.89999962,0.755441964,19.29999924,100.9247665,298.4619141,1.789999962,5.699999809,229,,15,18.7,0.165118391,100.9980459,0.741478935,19.6,368.0419922,,,,,30
2016-06-28 10:00:00,0.121033542,16.39999962,0.742169797,19.20000076,100.8075256,124.5117188,1.24000001,2.900000095,286,,-70,0.122817382,15.89999962,0.737561703,19.29999924,100.8954544,71.41113281,1.889999986,3.900000095,274,,-35,,,,,,0,,,,,0,0.132523268,19.10000038,0.688939154,20.39999962,100.9540787,472.4121094,1.820000052,5.900000095,253,,15,19.1,0.165118391,100.9980459,0.68470066,20.5,476.0742188,,,,,30
2016-06-28 11:00:00,0.121033542,16.39999962,0.715197206,19.5,100.8368378,153.8085938,1.909999967,3.799999952,290,,-70,0.122371979,15.89999962,0.706367195,19.70000076,100.9247665,120.8496094,2.900000095,5.400000095,278,,-35,0.134704471,17.70000076,0.68907088,20,100.9101105,137.3291016,3.24000001,3.900000095,270,0.05,0,0.132523268,19.39999962,0.659939826,20.89999962,100.9980469,587.7685547,2.079999924,6,269,,15,19.5,0.165118391,101.0420127,0.647879046,21.1,567.6269531,,,,,30
2016-06-28 12:00:00,0.120586656,16.39999962,0.629522681,20.10000038,100.8514862,172.1191406,1.700000048,3.299999952,299,,-70,0.122371979,16,0.617186248,20.20000076,100.9394226,119.0185547,2.900000095,6.099999905,284,,-35,0.134268954,17.79999924,0.598007619,20.60000038,100.9101105,175.78125,,,,,0,0.132523268,19.70000076,0.569745064,21.5,101.027359,644.53125,1.950000048,6.099999905,291,,15,20.1,0.165527898,101.0566683,0.566269099,21.6,618.8964844,,,,,30
2016-06-28 13:00:00,0.120139405,16.5,0.554673314,20.89999962,100.8368378,135.4980469,1.529999971,2.900000095,310,,-70,0.121926203,16,0.546575904,20.89999962,100.9101105,139.1601563,2.50999999,4.599999905,293,,-35,0.134268954,17.89999962,0.52681911,21.5,100.8954544,338.7451172,,,,,0,0.132085949,20.20000076,0.5054304,22.29999924,100.9980469,714.1113281,1.820000052,5.300000191,314,,15,20.9,0.165937056,101.0273571,0.495649907,22.5,714.1113281,,,,,30
2016-06-28 14:00:00,0.119691774,16.60000038,0.524670959,21.20000076,100.7928696,201.4160156,1.289999962,2.799999952,316,,-70,0.121480055,16.10000038,0.520696163,21.20000076,100.8807983,113.5253906,2.25,4.199999809,298,,-35,0.132960245,18,0.495053709,21.89999962,100.8661423,536.4990234,,,,,0,0.131210178,20.79999924,0.472286761,22.79999924,100.9540787,580.4443359,1.700000048,4.5,325,,15,21.7,0.166754329,100.9980459,0.465850145,22.9,589.5996094,,,,,30
2016-06-28 15:00:00,0.119243778,16.70000076,0.528645694,21.20000076,100.7489014,104.3701172,1.019999981,2.400000095,321,,-70,0.121480055,16.20000076,0.517512143,21.29999924,100.8661423,89.72167969,1.679999948,3.700000048,302,,-35,0.132523268,18.20000076,0.489051998,22.10000038,100.8368378,444.9462891,,,,,0,0.131210178,21.60000038,0.478051811,22.60000038,100.9247665,459.5947266,1.440000057,4.699999809,334,,15,22.4,0.166754329,100.9687347,0.468681523,22.8,479.7363281,,,,,30
2016-06-28 16:00:00,0.118795417,16.79999924,0.520696163,21.20000076,100.7049332,56.76269531,0.600000024,1.700000048,319,,-70,0.121480055,16.20000076,0.49864471,21.39999962,100.8221817,65.91796875,1.070000052,3,304,,-35,0.132085949,18.5,0.470242292,22.10000038,100.7928696,318.6035156,,,,,0,0.130771756,22.10000038,0.463454813,22.60000038,100.8807983,351.5625,1.029999971,3.900000095,339,,15,22.6,0.166754329,100.924768,0.457865796,22.8,368.0419922,,,,,30
2016-06-28 17:00:00,0.118346676,16.89999962,0.502571046,21.39999962,100.7049332,62.25585938,0.829999983,1.600000024,295,,-70,0.121033542,16.29999924,0.488697976,21.60000038,100.8221817,49.43847656,1.379999995,3.200000048,283,,-35,0.131210178,18.70000076,0.463647306,22.20000076,100.7928696,190.4296875,,,,,0,0.130332962,22.20000076,0.458935112,22.5,100.8807983,219.7265625,1.090000033,3.299999952,281,,15,22.6,0.166345867,100.9101124,0.456156303,22.6,232.5439453,,,,,30
2016-06-28 18:00:00,0.118346676,17,0.486865699,21.39999962,100.7049332,34.79003906,0.930000007,2.099999905,302,,-70,0.121033542,16.29999924,0.470299095,21.70000076,100.8075256,40.28320313,1.539999962,3.599999905,288,,-35,0.131210178,18.79999924,0.441559315,22.60000038,100.7635574,283.8134766,,,,,0,0.129454285,22.10000038,0.437182456,22.89999962,100.8661423,258.1787109,1.179999948,3.900000095,293,,15,22.4,0.165937056,100.9101124,0.437182443,22.9,287.4755859,,,,,30
2016-06-28 19:00:00,0.117897563,17,0.441200554,21.20000076,100.6902771,14.6484375,1.059999943,2.299999952,295,,-70,0.120586656,16.29999924,0.422762543,21.60000038,100.7928696,32.95898438,1.75,3.299999952,280,,-35,0.130771756,18.89999962,0.401371211,22.29999924,100.7635574,194.0917969,,,,,0,0.129014403,21.89999962,0.401417553,22.60000038,100.8661423,157.4707031,1.049999952,3.599999905,277,,15,22.1,0.165527898,100.8954568,0.400191406,22.5,184.9365234,,,,,30
2016-06-28 20:00:00,0.117448084,17,0.549818695,19.29999924,100.6902771,1.831054688,0.5,1.299999952,341,,-70,0.120586656,16.29999924,0.513331592,19.60000038,100.7782135,5.493164063,0.879999995,2.200000048,306,,-35,0.130771756,18.89999962,0.478943169,20.29999924,100.7489014,54.93164063,,,,,0,0.128574133,21.70000076,0.4976632,20.10000038,100.8514862,43.9453125,0.49000001,1.600000024,10,,15,21.8,0.165118391,100.8954568,0.500753393,20,53.10058594,,,,,30
2016-06-28 21:00:00,0.117448084,17,0.670687735,16.39999962,100.675621,0,0.569999993,0.899999976,100,,-70,0.120139405,16.29999924,0.662207901,16.60000038,100.7635574,0,0.680000007,1.100000024,87,,-35,0.130771756,18.89999962,0.641017199,16.60000038,100.7342453,1.831054688,,,,,0,0.128574133,21.39999962,0.664173722,16.29999924,100.8075256,1.831054688,0.620000005,0.899999976,102,,15,21.4,0.165118391,100.8954568,0.682511307,16,1.831054688,,,,,30
2016-06-28 22:00:00,0.117448084,17,0.720593929,14.89999962,100.660965,0,0.540000021,1,116,,-70,0.120139405,16.29999924,0.715968728,15,100.7635574,0,0.589999974,1,98,,-35,0.130771756,18.79999924,0.714687467,14.89999962,100.7489014,0,,,,,0,0.12813352,21,0.756429076,14.39999962,100.7928696,0,0.479999989,0.899999976,103,,15,21,0.164708535,100.8808012,0.771265689,14.1,0,,,,,30
2016-06-28 23:00:00,0.116998233,16.89999962,0.763762832,14,100.6463089,0,0.529999971,1.100000024,148,,-70,0.119691774,16.29999924,0.771265686,14.10000038,100.7342453,0,0.50999999,0.899999976,115,,-35,0.130771756,18.60000038,0.768735707,13.89999962,100.7195892,0,,,,,0,0.12813352,20.5,0.832106411,13.30000019,100.7489014,0,0.349999994,0.899999976,122,,15,20.5,0.16429833,100.8661456,0.866518751,12.8,0,,,,,30
2016-06-29 00:00:00,0.116998233,16.89999962,0.77605921,13.5,100.6169968,0,0.479999989,0.899999976,134,,-70,0.119691774,16.20000076,0.782526374,13.5,100.7049332,0,0.479999989,1.100000024,111,,-35,0.130771756,18.39999962,0.779690266,13.30000019,100.6902771,0,,,,,0,0.12813352,20.20000076,0.825900674,12.80000019,100.7195892,0,0.49000001,1,105,,15,20,0.163887775,100.8368344,0.860442778,12.3,0,,,,,30
2016-06-29 01:00:00,0.116998233,16.79999924,0.788993537,13.5,100.5730362,0,0.479999989,1.200000048,142,,-70,0.119691774,16.10000038,0.801927865,13.5,100.660965,0,0.409999996,1.399999976,126,,-35,0.130332962,18.29999924,0.816489697,13.10000038,100.6463089,0,,,,,0,0.12813352,19.79999924,0.851771891,12.69999981,100.675621,0,0.389999986,1.299999952,140,,15,19.6,0.163887775,100.7928676,0.875655241,12.4,0,,,,,30
2016-06-29 02:00:00,0.116548009,16.70000076,0.831746876,13.89999962,100.5144119,0,0.479999989,1,170,,-70,0.119243778,16,0.849009693,13.69999981,100.6169968,0,0.389999986,0.800000012,164,,-35,0.130771756,18.10000038,0.852735937,13.39999962,100.6023483,0,,,,,0,0.127692536,19.5,0.876232803,13.10000038,100.6316528,0,0.389999986,1.100000024,195,,15,19.3,0.163476872,100.7342452,0.881978668,13,0,,,,,30
2016-06-29 03:00:00,0.116548009,16.60000038,0.826312542,14.80000019,100.4411316,0,0.50999999,1,176,,-70,0.119243778,16,0.849088073,14.60000038,100.529068,0,0.430000007,0.800000012,165,,-35,0.130332962,17.89999962,0.870783865,14.10000038,100.529068,0,,,,,0,0.127692536,19.29999924,0.876449108,14,100.5583801,0,0.5,2.900000095,212,,15,19,0.163476872,100.6756229,0.848529633,14.5,0,,,,,30
2016-06-29 04:00:00,0.116548009,16.5,0.845077813,15,100.3825073,0,0.389999986,0.899999976,155,,-70,0.118795417,15.89999962,0.867925406,14.80000019,100.4557877,0,0.319999993,0.699999988,156,,-35,0.130332962,17.79999924,0.889878452,14.19999981,100.4704437,0,,,,,0,0.127692536,19.10000038,0.901883245,14.10000038,100.4997559,0,0.409999996,1.799999952,216,,15,18.8,0.163065619,100.6170005,0.884135319,14.3,0,,,,,30
2016-06-29 05:00:00,0.116097413,16.39999962,0.845863819,15.19999981,100.3238907,0,0.449999988,1.100000024,150,,-70,0.118346676,15.80000019,0.874420822,15,100.3825073,0,0.419999987,1,133,,-35,0.130332962,17.60000038,0.897263288,14.60000038,100.3825073,1.831054688,,,,,0,0.127692536,19,0.90307796,14.5,100.4118195,3.662109375,0.370000005,1.700000048,211,,15,18.6,0.162654016,100.5437225,0.867925405,14.8,3.662109375,,,,,30
2016-06-29 06:00:00,0.116097413,16.29999924,0.885759473,14.80000019,100.3092346,0,0.479999989,1,166,0.35,-70,0.118346676,15.80000019,0.9035936,14.80000019,100.3825073,0,0.49000001,1.100000024,146,0.5,-35,0.130332962,17.60000038,0.915423214,14.69999981,100.3825073,1.831054688,,,,0.55,0,0.127692536,18.79999924,0.915423214,14.69999981,100.4118195,3.662109375,0.460000008,1.899999976,217,3.2,15,18.6,0.162654016,100.5437225,0.897648878,14.8,3.662109375,,,,1.2,30
2016-06-29 07:00:00,0.117448084,16.29999924,0.970301986,14.10000038,100.3238907,1.831054688,0.550000012,1.100000024,165,0.5,-70,0.118795417,15.69999981,0.988753796,14.19999981,100.3971634,1.831054688,0.49000001,1,140,0.45,-35,0.130771756,17.5,0.995181561,14.10000038,100.3971634,14.6484375,,,,0.45,0,0.129014403,18.79999924,0.982372582,14.30000019,100.4704437,21.97265625,0.360000014,2.099999905,190,2,15,18.4,0.163476872,100.5437225,0.982574093,14.2,25.63476563,,,,0.4,30
2016-06-29 08:00:00,0.116998233,16.20000076,0.986386776,14.89999962,100.3092346,34.79003906,0.529999971,1.200000048,163,0.1,-70,0.118795417,15.69999981,1.015267134,15,100.3532028,36.62109375,0.469999999,1.299999952,139,,-35,0.130771756,17.39999962,1.002290726,15.19999981,100.3678589,84.22851563,,,,0.05,0,0.129014403,18.70000076,0.982538939,15.60000038,100.4411316,168.4570313,0.50999999,2.599999905,210,0.2,15,18.4,0.163065619,100.5144113,0.97689219,15.6,206.9091797,,,,,30
2016-06-29 09:00:00,0.116998233,16.20000076,0.962464511,16.79999924,100.2799225,54.93164063,0.479999989,1.299999952,163,,-70,0.118346676,15.69999981,1.004310727,16.79999924,100.3385468,56.76269531,0.439999998,1.200000048,134,0.05,-35,0.130771756,17.39999962,0.979171813,17.20000076,100.3385468,117.1875,,,,0.05,0,0.128574133,18.70000076,0.948735714,17.70000076,100.3971634,245.3613281,0.720000029,3.799999952,208,,15,18.4,0.163065619,100.4851001,0.93885303,17.7,309.4482422,,,,,30
2016-06-29 10:00:00,0.116998233,16.10000038,0.920332074,18.10000038,100.2506104,82.39746094,0.439999998,1.399999976,181,,-70,0.118346676,15.69999981,0.952875912,18.20000076,100.3385468,71.41113281,0.379999995,1.100000024,157,,-35,0.130332962,17.39999962,0.918840945,18.70000076,100.3238907,146.484375,,,,,0,0.12813352,18.79999924,0.881607711,19.20000076,100.3825073,395.5078125,1.450000048,5.199999809,212,,15,18.7,0.163065619,100.4704446,0.876133875,19.3,426.6357422,,,,,30
2016-06-29 11:00:00,0.116548009,16.20000076,0.830309033,20,100.2506104,214.2333984,0.610000014,1.899999976,232,,-70,0.118346676,15.69999981,0.837945759,20.10000038,100.3532028,151.9775391,0.670000017,2.299999952,232,,-35,0.130332962,17.5,0.800892293,20.5,100.3238907,140.9912109,,,,,0,0.127692536,19.10000038,0.757782876,21.39999962,100.3971634,631.7138672,2.119999886,5.699999809,213,,15,19.1,0.163476872,100.455789,0.749253813,21.5,618.8964844,,,,,30
2016-06-29 12:00:00,0.116097413,16.20000076,0.742077529,21.39999962,100.2212982,78.73535156,0.5,1.700000048,241,0.1,-70,0.117897563,15.69999981,0.725289881,21.60000038,100.3092346,80.56640625,0.649999976,2,236,0.05,-35,0.130332962,17.60000038,0.696429491,22,100.2799225,139.1601563,,,,0.1,0,0.127251178,19.5,0.675552487,22.5,100.3825073,362.5488281,1.850000024,7,211,0.4,15,19.9,0.163476872,100.4264778,0.667399532,22.7,368.0419922,,,,,30
2016-06-29 13:00:00,0.12813352,16.29999924,0.913314998,17.79999924,100.2799225,102.5390625,0.639999986,3.900000095,277,1.75,-70,0.121033542,15.80000019,0.921286762,18,100.3532028,115.3564453,0.879999995,4.599999905,260,1.3,-35,0.167570204,17.79999924,0.883425534,18.5,100.3532028,298.4619141,,,,2.1,0,0.129454285,19.89999962,0.879929304,18.89999962,100.3971634,441.2841797,1.330000043,6.300000191,219,8.6,15,20.4,0.163476872,100.4851001,0.879929303,18.9,452.2705078,,,,,30
2016-06-29 14:00:00,0.140333071,16.39999962,0.82087487,21,100.2506104,322.265625,0.649999976,1.5,258,,-70,0.124151386,16,0.810855091,21.20000076,100.3532028,131.8359375,0.949999988,2.099999905,253,,-35,0.184778139,18,0.735078871,22.39999962,100.3238907,864.2578125,,,,,0,0.129014403,20.10000038,0.72744292,22.89999962,100.4118195,827.6367188,1.419999957,4,233,,15,20.7,0.163887775,100.4704446,0.715927979,23,812.9882813,,,,,30
2016-06-29 15:00:00,0.143766493,16.60000038,0.654535174,23.20000076,100.2359543,140.9912109,0.74000001,3.099999905,259,,-70,0.12636736,16.10000038,0.621750236,23.60000038,100.3238907,140.9912109,1.080000043,3.299999952,255,,-35,0.185955137,18.20000076,0.562418878,24.89999962,100.3092346,756.2255859,,,,,0,0.12813352,21,0.558892369,25.10000038,100.4118195,704.9560547,1.889999986,5.300000191,221,,15,21.6,0.164708535,100.4264778,0.549331563,25.2,717.7734375,,,,,30
2016-06-29 16:00:00,0.145900697,16.70000076,0.779471993,20.60000038,100.2652664,62.25585938,0.850000024,3.599999905,278,0.15,-70,0.128574133,16.20000076,0.761157572,20.89999962,100.3678589,78.73535156,1.210000038,4.900000095,267,0.1,-35,0.186346784,18.70000076,0.729168415,21.60000038,100.3385468,338.7451172,,,,0.4,0,0.129014403,21.89999962,0.727971256,21.79999924,100.4118195,369.8730469,1.519999981,5.699999809,236,1,15,22.1,0.164708535,100.4851001,0.727971245,21.8,391.8457031,,,,,30
2016-06-29 17:00:00,0.147176906,16.79999924,0.727971256,21.79999924,100.2652664,108.0322266,0.959999979,2.099999905,287,,-70,0.130771756,16.29999924,0.706688225,22.20000076,100.3532028,95.21484375,1.519999981,4.400000095,278,,-35,0.18712908,19,0.654090762,23.29999924,100.3238907,463.2568359,,,,,0,0.128574133,22,0.645795822,23.60000038,100.4264755,426.6357422,1.340000033,3.900000095,265,,15,22.1,0.165118391,100.4704446,0.645795846,23.6,461.4257813,,,,,30
2016-06-29 18:00:00,0.148449913,17,0.594825745,23,100.2652664,43.9453125,1.269999981,2.5,289,,-70,0.132523268,16.29999924,0.57366544,23.39999962,100.3532028,38.45214844,1.899999976,4.300000191,274,,-35,0.186346784,19.20000076,0.530462325,24.5,100.3385468,408.3251953,,,,,0,0.127251178,21.89999962,0.530587256,24.70000076,100.4411316,338.7451172,1.480000019,4.900000095,258,,15,22.1,0.165118391,100.4704446,0.527371595,24.7,380.859375,,,,,30
2016-06-29 19:00:00,0.14929679,17.10000038,0.511431158,22.70000076,100.2945786,14.6484375,1.110000014,1.899999976,306,,-70,0.133833081,16.39999962,0.48856771,23.10000038,100.3678589,38.45214844,1.929999948,3.400000095,290,,-35,0.185563132,19.29999924,0.459416896,24,100.3532028,234.375,,,,,0,0.126809448,21.79999924,0.454514682,24.29999924,100.4704437,179.4433594,1.210000038,3.299999952,309,,15,21.9,0.165118391,100.4997557,0.454514692,24.3,214.2333984,,,,,30
2016-06-29 20:00:00,0.1497197,17.10000038,0.610006034,20.5,100.3238907,1.831054688,0.74000001,1.700000048,330,,-70,0.134704471,16.5,0.574916899,20.89999962,100.4118195,7.32421875,1.269999981,3.200000048,312,,-35,0.184385121,19.39999962,0.523604989,21.60000038,100.3971634,84.22851563,,,,,0,0.12636736,21.5,0.53524065,21.60000038,100.4997559,60.42480469,0.899999976,4.599999905,351,,15,21.6,0.165527898,100.5437225,0.535240655,21.6,75.07324219,,,,,30
2016-06-29 21:00:00,0.150142252,17.20000076,0.800687313,17.39999962,100.3971634,0,0.310000002,0.600000024,58,,-70,0.135574386,16.5,0.795614123,17.60000038,100.4704437,0,0.379999995,0.800000012,39,,-35,0.18320407,19.39999962,0.690763593,18.5,100.4557877,10.98632813,,,,,0,0.12636736,21.20000076,0.741454661,17.79999924,100.5144119,7.32421875,0.610000014,1.399999976,32,,15,21.2,0.166345867,100.5876893,0.74119976,17.7,9.155273438,,,,,30
2016-06-29 22:00:00,0.150564432,17.20000076,0.836884797,16.20000076,100.4411316,0,0.439999998,0.800000012,91,,-70,0.13644287,16.5,0.826167285,16.29999924,100.5144119,0,0.529999971,1,84,,-35,0.182414994,19.29999924,0.793410242,16.20000076,100.4997559,0,,,,,0,0.1259249,20.89999962,0.819831729,15.89999962,100.5437241,0,0.560000002,1,96,,15,20.8,0.166754329,100.6609673,0.841609161,15.7,0,,,,,30
2016-06-29 23:00:00,0.150986269,17.10000038,0.805908263,15.30000019,100.4411316,0,0.519999981,0.699999988,115,,-70,0.136876568,16.5,0.812190831,15.39999962,100.5144119,0,0.540000021,0.899999976,98,,-35,0.181228831,19.20000076,0.783592522,15.39999962,100.4997559,0,,,,,0,0.1259249,20.5,0.822689474,15.19999981,100.5437241,0,0.519999981,0.899999976,104,,15,20.4,0.166754329,100.6756229,0.856443633,14.9,0,,,,,30
2016-06-30 00:00:00,0.150986269,17.10000038,0.819692671,14.69999981,100.4264755,0,0.409999996,0.800000012,120,,-70,0.137309894,16.39999962,0.820367873,14.80000019,100.529068,0,0.439999998,0.800000012,100,,-35,0.180039614,19,0.796589077,14.80000019,100.529068,0,,,,,0,0.1259249,20.10000038,0.854590535,14.5,100.5583801,0,0.340000004,0.899999976,97,,15,20,0.167162443,100.6609673,0.883698712,14.2,0,,,,,30
2016-06-30 01:00:00,0.151407763,17,0.822737038,14.30000019,100.4264755,0,0.469999999,1,133,,-70,0.137309894,16.29999924,0.829631865,14.39999962,100.529068,0,0.49000001,0.899999976,108,,-35,0.179245099,18.79999924,0.805230916,14.39999962,100.5144119,0,,,,,0,0.1259249,19.79999924,0.84662044,14.19999981,100.5437241,0,0.419999987,0.899999976,110,,15,19.7,0.167570209,100.6463117,0.87585464,13.9,0,,,,,30
2016-06-30 02:00:00,0.151407763,17,0.840730846,13.5,100.4411316,0,0.550000012,0.899999976,137,,-70,0.137742862,16.29999924,0.848125517,13.60000038,100.529068,0,0.569999993,1,113,,-35,0.178449214,18.60000038,0.834263682,13.5,100.5144119,0,,,,,0,0.1259249,19.5,0.864866495,13.30000019,100.5437241,0,0.50999999,0.899999976,114,,15,19.3,0.1683847,100.6609673,0.895341981,13,0,,,,,30
2016-06-30 03:00:00,0.151407763,16.79999924,0.866518736,12.80000019,100.4118195,0,0.379999995,0.800000012,117,,-70,0.137742862,16.20000076,0.867590249,12.89999962,100.5144119,0,0.389999986,0.800000012,93,,-35,0.177252814,18.39999962,0.865400195,12.69999981,100.4850998,0,,,,,0,0.125482067,19.20000076,0.915412366,12.19999981,100.5144119,0,0.310000002,0.800000012,78,,15,19,0.1683847,100.6316561,0.927548449,12,0,,,,,30
2016-06-30 04:00:00,0.151407763,16.79999924,0.873162568,12.19999981,100.4118195,0,0.449999988,0.899999976,121,,-70,0.137742862,16.10000038,0.888424635,12.30000019,100.5144119,0,0.400000006,0.899999976,98,,-35,0.176453516,18.20000076,0.900193632,12.10000038,100.4997559,0,,,,,0,0.125482067,18.89999962,0.925405562,11.80000019,100.5144119,0,0.370000005,1,118,,15,18.6,0.1683847,100.6463117,0.951310309,11.5,0,,,,,30
2016-06-30 05:00:00,0.151407763,16.60000038,0.881429195,12.30000019,100.4118195,0,0.419999987,0.600000024,128,,-70,0.137742862,16,0.889554501,12.39999962,100.5144119,0,0.430000007,0.699999988,102,,-35,0.175652832,18,0.881429195,12.30000019,100.4997559,7.32421875,,,,,0,0.125482067,18.60000038,0.908370733,12.19999981,100.529068,16.47949219,0.379999995,0.699999988,104,,15,18.3,0.1683847,100.6463117,0.948048366,11.9,20.14160156,,,,,30
2016-06-30 06:00:00,0.151828885,16.60000038,0.892656922,12.69999981,100.4264755,10.98632813,0.230000004,0.5,138,,-70,0.137742862,16,0.900367141,12.80000019,100.529068,9.155273438,0.239999995,0.5,107,,-35,0.174850777,17.79999924,0.887766778,12.89999962,100.4997559,27.46582031,,,,,0,0.125482067,18.39999962,0.907943308,12.89999962,100.5437241,54.93164063,0.280000001,0.600000024,94,,15,18.1,0.1683847,100.6463117,0.921394298,12.9,65.91796875,,,,,30
2016-06-30 07:00:00,0.151407763,16.39999962,0.889878452,14.19999981,100.4118195,29.296875,0.200000003,0.600000024,121,,-70,0.137742862,15.89999962,0.914597273,14.19999981,100.4997559,27.46582031,0.280000001,0.600000024,97,,-35,0.174047351,17.70000076,0.884533942,14.39999962,100.4850998,40.28320313,,,,,0,0.125482067,18.20000076,0.885976195,14.89999962,100.5437241,170.2880859,0.300000012,0.699999988,96,,15,17.9,0.1683847,100.6463117,0.874986121,15.3,199.5849609,,,,,30
2016-06-30 08:00:00,0.151407763,16.29999924,0.858049095,16.70000076,100.4264755,45.77636719,0.25,0.800000012,139,,-70,0.137742862,15.80000019,0.873541117,16.79999924,100.4997559,47.60742188,0.289999992,1.100000024,113,,-35,0.172839627,17.60000038,0.820967019,17.29999924,100.4850998,86.05957031,,,,,0,0.125038877,18.20000076,0.742488444,18.60000038,100.5583801,217.8955078,0.300000012,1.700000048,102,,15,17.9,0.168791424,100.6316561,0.658403971,19.7,311.2792969,,,,,30
2016-06-30 09:00:00,0.151407763,16.29999924,0.807466269,18.70000076,100.4264755,75.07324219,0.25999999,0.899999976,152,,-70,0.137742862,15.80000019,0.811656892,18.79999924,100.5144119,62.25585938,0.25,1.299999952,120,,-35,0.172436357,17.5,0.755441964,19.29999924,100.4850998,76.90429688,,,,,0,0.125038877,18.29999924,0.663952172,20.5,100.5730362,294.7998047,0.540000021,3.400000095,223,,15,18.1,0.169197802,100.6316561,0.578545568,21.8,441.2841797,,,,,30
2016-06-30 10:00:00,0.150986269,16.20000076,0.698887825,21.39999962,100.4264755,124.5117188,0.379999995,1.100000024,187,,-70,0.137309894,15.69999981,0.694961488,21.39999962,100.5144119,80.56640625,0.409999996,1.5,190,,-35,0.17122449,17.5,0.65134269,21.79999924,100.4850998,108.0322266,,,,,0,0.125038877,18.5,0.573671341,23.5,100.6023483,571.2890625,0.959999979,3.700000048,214,,15,18.5,0.169603833,100.6316561,0.536545288,24,582.2753906,,,,,30
2016-06-30 11:00:00,0.150564432,16.29999924,0.624262929,22.39999962,100.4411316,104.3701172,0.400000006,1.600000024,238,,-70,0.137309894,15.80000019,0.594856083,22.70000076,100.5144119,93.38378906,0.529999971,1.600000024,232,,-35,0.170009524,17.60000038,0.549328148,23.39999962,100.4997559,175.78125,,,,,0,0.125038877,18.79999924,0.519999802,24.10000038,100.6316528,432.1289063,1.389999986,4.5,219,,15,19.2,0.169603833,100.6316561,0.50694887,24.2,450.4394531,,,,,30
2016-06-30 12:00:00,0.150564432,16.39999962,0.555834293,23.10000038,100.4557877,97.04589844,0.569999993,1.700000048,232,,-70,0.137309894,15.80000019,0.521833599,23.5,100.5437241,97.04589844,0.689999998,2.099999905,223,,-35,0.169197798,17.70000076,0.486244172,24,100.4997559,212.4023438,,,,,0,0.124595322,19.20000076,0.471883684,24.5,100.6316528,448.6083984,2.00999999,5.5,209,,15,19.8,0.170009517,100.6463117,0.465834265,24.6,465.0878906,,,,,30
2016-06-30 13:00:00,0.150142252,16.5,0.537519395,22.89999962,100.4411316,78.73535156,0.569999993,1.399999976,234,,-70,0.137309894,16,0.503684878,23.29999924,100.529068,82.39746094,0.730000019,1.799999952,236,,-35,0.167977631,17.89999962,0.478549719,23.79999924,100.4997559,216.0644531,,,,,0,0.124151386,19.60000038,0.473814964,24.20000076,100.6316528,351.5625,1.659999967,4.699999809,214,,15,20.3,0.170009517,100.6463117,0.464395446,24.3,369.8730469,,,,,30
2016-06-30 14:00:00,0.1497197,16.60000038,0.530352473,22.89999962,100.4557877,73.2421875,0.670000017,1.5,258,,-70,0.136876568,16,0.513774931,23.20000076,100.529068,75.07324219,0.769999981,1.600000024,245,,-35,0.166754335,18.10000038,0.491217047,23.60000038,100.4997559,223.3886719,,,,,0,0.123707086,19.89999962,0.489174932,23.89999962,100.6316528,331.4208984,1.75,5.199999809,212,,15,20.5,0.170009517,100.6463117,0.479999819,24.1,349.7314453,,,,,30
2016-06-30 15:00:00,0.14929679,16.70000076,0.555645585,23,100.4557877,86.05957031,0.569999993,1.5,234,,-70,0.136876568,16.20000076,0.531667352,23.29999924,100.529068,98.87695313,0.670000017,2,222,,-35,0.165937051,18.29999924,0.506043017,23.89999962,100.4997559,344.2382813,,,,,0,0.12326242,20.10000038,0.493695319,24.20000076,100.6316528,426.6357422,1.799999952,5.400000095,211,,15,20.7,0.170009517,100.6463117,0.487450539,24.3,448.6083984,,,,,30
2016-06-30 16:00:00,0.14929679,16.89999962,0.549727619,23.70000076,100.4411316,80.56640625,0.419999987,1.299999952,205,,-70,0.136876568,16.20000076,0.529999793,24.10000038,100.529068,97.04589844,0.529999971,1.600000024,200,,-35,0.16470854,18.39999962,0.481744289,25.70000076,100.4997559,596.9238281,,,,,0,0.122817382,20.29999924,0.478064835,25.39999962,100.6169968,563.9648438,1.669999957,5.5,217,,15,20.9,0.170009517,100.6316561,0.46910066,25.5,593.2617188,,,,,30
2016-06-30 17:00:00,0.148873523,17,0.584155023,23.20000076,100.4411316,47.60742188,0.430000007,1.100000024,215,,-70,0.136876568,16.29999924,0.563303828,23.5,100.5144119,42.11425781,0.49000001,1.399999976,209,,-35,0.163476869,18.60000038,0.53676939,24.20000076,100.4997559,208.7402344,,,,,0,0.122371979,20.70000076,0.530142605,24.20000076,100.6023483,236.2060547,1.379999995,5.800000191,211,,15,21.1,0.170009517,100.6316561,0.526666468,24.1,250.8544922,,,,,30
2016-06-30 18:00:00,0.148449913,17.10000038,0.642937183,22.29999924,100.4557877,27.46582031,0.409999996,1.200000048,197,,-70,0.13644287,16.39999962,0.627671063,22.60000038,100.529068,27.46582031,0.50999999,1.200000048,185,,-35,0.163065612,18.79999924,0.598231077,23.20000076,100.4997559,124.5117188,,,,,0,0.121926203,20.79999924,0.598318398,23.10000038,100.6169968,148.3154297,1.289999962,4.800000191,211,,15,21.2,0.170009517,100.6463117,0.591237724,23.1,159.3017578,,,,,30
2016-06-30 19:00:00,0.14802593,17.20000076,0.690028965,21.70000076,100.4557877,18.31054688,0.379999995,1,183,,-70,0.13644287,16.5,0.673719823,22,100.5583801,25.63476563,0.519999981,1.399999976,174,,-35,0.16224207,19,0.652548909,22.79999924,100.5144119,109.8632813,,,,,0,0.121926203,20.79999924,0.634272873,22.89999962,100.6169968,120.8496094,0.790000021,3.5,211,,15,21.1,0.170009517,100.6609673,0.634754989,22.7,135.4980469,,,,,30
2016-06-30 20:00:00,0.14802593,17.20000076,0.703184485,21.29999924,100.4997559,3.662109375,0.379999995,0.800000012,178,,-70,0.13644287,16.5,0.690718353,21.5,100.5876923,5.493164063,0.49000001,1,171,,-35,0.16224207,19,0.669934869,22,100.5583801,34.79003906,,,,,0,0.121926203,20.70000076,0.670226574,21.89999962,100.6316528,36.62109375,0.620000005,2.700000048,204,,15,21,0.170009517,100.6902785,0.670754435,21.7,42.11425781,,,,,30
2016-06-30 21:00:00,0.147601604,17.29999924,0.794663548,19.5,100.529068,0,0.430000007,0.800000012,169,,-70,0.13644287,16.5,0.794128299,19.60000038,100.6316528,0,0.400000006,0.899999976,132,,-35,0.161829755,19.10000038,0.790248752,19.5,100.6023483,0,,,,,0,0.121926203,20.60000038,0.809082806,19.29999924,100.660965,0,0.360000014,0.899999976,131,,15,20.8,0.170009517,100.7489008,0.804612743,19.3,0,,,,,30
2016-06-30 22:00:00,0.147601604,17.29999924,0.858512998,18.70000076,100.5876923,0,0.419999987,0.899999976,151,,-70,0.13644287,16.60000038,0.862385452,18.79999924,100.675621,0,0.460000008,0.899999976,126,,-35,0.161417112,19,0.85316205,18.79999924,100.660965,0,,,,,0,0.121926203,20.39999962,0.85316205,18.79999924,100.6902771,0,0.419999987,0.899999976,124,,15,20.6,0.169603833,100.7928676,0.853162053,18.8,0,,,,,30
2016-06-30 23:00:00,0.147601604,17.29999924,0.855231106,18.5,100.5876923,0,0.419999987,0.899999976,144,,-70,0.13644287,16.60000038,0.874027371,18.5,100.675621,0,0.430000007,0.899999976,125,,-35,0.161004096,19,0.875538528,18.29999924,100.660965,0,,,,,0,0.121926203,20.20000076,0.897042394,18,100.675621,0,0.219999999,0.899999976,182,,15,20.3,0.169603833,100.7928676,0.892193512,18,0,,,,,30
2016-07-01 00:00:00,0.147601604,17.29999924,0.896982491,17.29999924,100.5876923,0,0.300000012,0.800000012,118,,-70,0.136008814,16.5,0.91218555,17.29999924,100.660965,0,0.330000013,0.800000012,101,,-35,0.160590753,18.79999924,0.937686324,16.60000038,100.6463089,0,,,,,0,0.121926203,20,0.957717478,16,100.675621,0,0.270000011,0.800000012,244,,15,20.1,0.169603833,100.8075232,0.95162255,16.1,0,,,,,30
2016-07-01 01:00:00,0.147176906,17.20000076,0.917500794,16.39999962,100.5876923,0,0.50999999,1,157,,-70,0.136008814,16.5,0.938962817,16.39999962,100.6463089,0,0.529999971,1.100000024,130,,-35,0.160590753,18.70000076,0.951622546,16.10000038,100.6316528,0,,,,,0,0.121926203,19.79999924,0.965598643,15.60000038,100.6902771,0,0.280000001,0.899999976,187,,15,19.8,0.169197802,100.8075232,0.971807291,15.5,0,,,,,30
2016-07-01 02:00:00,0.147176906,17.20000076,0.930619836,15.89999962,100.5583801,0,0.699999988,1.200000048,159,,-70,0.136008814,16.5,0.958316803,15.89999962,100.6169968,0,0.670000017,1.100000024,132,,-35,0.160590753,18.60000038,0.952777445,15.89999962,100.6316528,0,,,,,0,0.121926203,19.60000038,0.97911638,15.19999981,100.675621,0,0.289999992,0.899999976,185,,15,19.5,0.168791424,100.778212,0.972846411,15.3,0,,,,,30
2016-07-01 03:00:00,0.147176906,17.20000076,0.937708795,15.5,100.529068,0,0.779999971,1.299999952,162,,-70,0.136008814,16.39999962,0.960441113,15.5,100.5876923,0,0.709999979,1.200000048,134,,-35,0.160177037,18.5,0.960901797,15.39999962,100.6169968,0,,,,,0,0.121480055,19.29999924,0.980480313,14.89999962,100.660965,0,0.319999993,1,166,,15,19.2,0.1683847,100.7635564,0.985924115,15,0,,,,,30
2016-07-01 04:00:00,0.146751866,17.10000038,0.950148404,15.19999981,100.529068,0,0.800000012,1.5,163,,-70,0.135574386,16.39999962,0.97911638,15.19999981,100.6023483,0,0.720000029,1.200000048,137,,-35,0.159348577,18.29999924,0.979600728,15.10000038,100.6169968,0,,,,,0,0.121480055,19.10000038,0.993204296,14.69999981,100.675621,0,0.289999992,1.100000024,176,,15,19,0.1683847,100.7635564,0.998199821,14.9,0,,,,,30
2016-07-01 05:00:00,0.146751866,17,0.96385622,15.89999962,100.5730362,0,0.839999974,1.399999976,161,,-70,0.135574386,16.29999924,0.990742207,16,100.6169968,0,0.720000029,1.100000024,138,,-35,0.159348577,18.20000076,0.991553247,15.89999962,100.6169968,7.32421875,,,,,0,0.121926203,18.89999962,1.003488779,15.80000019,100.7049332,12.81738281,0.330000013,1.100000024,162,,15,18.8,0.1683847,100.7928676,1.003488794,15.8,14.6484375,,,,,30
2016-07-01 06:00:00,0.146326452,16.89999962,0.960424781,16.39999962,100.5876923,7.32421875,0.680000007,1.299999952,165,,-70,0.135139614,16.29999924,0.991651773,16.5,100.6463089,5.493164063,0.620000005,1.100000024,142,,-35,0.158933818,18.10000038,0.986320317,16.5,100.6463089,14.6484375,,,,,0,0.121926203,18.79999924,0.992617846,16.39999962,100.7049332,32.95898438,0.289999992,1.200000048,171,,15,18.7,0.1683847,100.8075232,0.986320335,16.5,40.28320313,,,,,30
2016-07-01 07:00:00,0.146326452,16.79999924,0.93484658,17.60000038,100.6169968,21.97265625,0.300000012,0.800000012,194,,-70,0.135139614,16.20000076,0.968501031,17.70000076,100.675621,23.80371094,0.300000012,1,178,,-35,0.158933818,18,0.94768703,17.79999924,100.675621,18.31054688,,,,,0,0.121926203,18.79999924,0.912622213,18.39999962,100.7489014,161.1328125,0.850000024,3.900000095,208,,15,18.6,0.1683847,100.8221788,0.889095233,18.9,186.7675781,,,,,30
2016-07-01 08:00:00,0.146326452,16.79999924,0.786278367,20.20000076,100.6023483,45.77636719,0.660000026,2.200000048,257,,-70,0.134704471,16.20000076,0.78079772,20.39999962,100.7195892,69.58007813,0.779999971,2.099999905,250,,-35,0.158103243,18,0.754189491,20.70000076,100.6902771,25.63476563,,,,,0,0.121926203,18.70000076,0.735862613,21.10000038,100.7635574,115.3564453,1.870000005,5.699999809,210,,15,18.6,0.1683847,100.8221788,0.687058633,22.4,443.1152344,,,,,30
2016-07-01 09:00:00,0.145474568,16.79999924,0.697319806,21.79999924,100.6023483,89.72167969,0.699999988,2.099999905,267,,-70,0.134704471,16.10000038,0.685074627,22,100.7049332,62.25585938,0.860000014,2.299999952,253,,-35,0.157687426,17.89999962,0.669625044,22.10000038,100.675621,49.43847656,,,,,0,0.121480055,18.79999924,0.64926368,22.70000076,100.7782135,212.4023438,1.99000001,6.099999905,216,,15,18.8,0.1683847,100.8075232,0.607520565,23.8,554.8095703,,,,,30
2016-07-01 10:00:00,0.145048082,16.79999924,0.651016176,23.20000076,100.6023483,135.4980469,0.50999999,1.399999976,217,,-70,0.134704471,16.20000076,0.633103907,23.29999924,100.6902771,65.91796875,0.610000014,2,222,,-35,0.157271251,17.89999962,0.61911267,23.29999924,100.660965,64.08691406,,,,,0,0.121480055,18.79999924,0.572587967,24.60000038,100.7928696,666.5039063,1.889999986,5.199999809,211,,15,19.2,0.1683847,100.8075232,0.5624189,24.9,644.53125,,,,,30
2016-07-01 11:00:00,0.144194052,16.79999924,0.603613436,24,100.6316528,150.1464844,0.689999998,1.799999952,259,,-70,0.134268954,16.20000076,0.583156884,24.20000076,100.7195892,109.8632813,0.889999986,2.5,250,,-35,0.156020626,18,0.56638664,24.39999962,100.6902771,113.5253906,,,,,0,0.121033542,19.10000038,0.539750636,25.39999962,100.8075256,631.7138672,1.870000005,5.099999905,219,,15,19.9,0.1683847,100.8221788,0.533376789,25.6,617.0654297,,,,,30
2016-07-01 12:00:00,0.143766493,16.89999962,0.565959752,24.70000076,100.6316528,206.9091797,0.74000001,2,263,,-70,0.134268954,16.29999924,0.552999675,24.79999924,100.7049332,100.7080078,1,3,254,,-35,0.155185118,18.10000038,0.536964238,25,100.6902771,179.4433594,,,,,0,0.120586656,19.5,0.518102348,25.70000076,100.8075256,659.1796875,2.059999943,5.900000095,217,,15,20.6,0.1683847,100.8221788,0.50897599,26,653.6865234,,,,,30
2016-07-01 13:00:00,0.142910302,17,0.535950959,25.89999962,100.6023483,109.8632813,0.600000024,1.799999952,226,,-70,0.133833081,16.39999962,0.532956779,25.89999962,100.6902771,130.0048828,0.689999998,2.900000095,226,,-35,0.15434818,18.20000076,0.508715749,26.39999962,100.660965,371.7041016,,,,,0,0.120139405,20.10000038,0.485450059,27,100.7635574,708.6181641,1.950000048,5.599999905,215,,15,21.4,0.169197802,100.7635564,0.477011958,27.2,712.2802734,,,,,30
2016-07-01 14:00:00,0.142481655,17.20000076,0.539135337,25.79999924,100.6023483,186.7675781,0.550000012,1.600000024,250,,-70,0.133833081,16.5,0.523974419,25.89999962,100.675621,111.6943359,0.730000019,2.400000095,246,,-35,0.15350984,18.39999962,0.502901852,26.39999962,100.6463089,499.8779297,,,,,0,0.119243778,20.70000076,0.488351077,26.79999924,100.7635574,551.1474609,1.799999952,5.900000095,217,,15,22.2,0.169603833,100.7635564,0.482665474,26.9,567.6269531,,,,,30
2016-07-01 15:00:00,0.142052665,17.29999924,0.538740695,26,100.5583801,106.2011719,0.419999987,1.299999952,191,,-70,0.133396849,16.60000038,0.532407165,26.20000076,100.6463089,91.55273438,0.460000008,1.399999976,189,,-35,0.152249649,18.70000076,0.504745185,27.20000076,100.6023483,454.1015625,,,,,0,0.118795417,21.39999962,0.493523538,27.29999924,100.7049332,470.5810547,1.299999952,4.900000095,218,,15,22.7,0.169603833,100.7195896,0.482495093,27.3,487.0605469,,,,,30
2016-07-01 16:00:00,0.141193599,17.5,0.530221701,25.70000076,100.529068,49.43847656,0.479999989,1.600000024,239,,-70,0.133396849,16.70000076,0.517905414,26,100.6023483,47.60742188,0.550000012,1.899999976,232,,-35,0.151407763,19,0.491190314,26.79999924,100.5730362,292.96875,,,,,0,0.118346676,22,0.48551181,26.79999924,100.6902771,320.4345703,1.429999948,4.300000191,217,,15,23,0.169603833,100.6902785,0.479837917,27,338.7451172,,,,,30
2016-07-01 17:00:00,0.140763521,17.60000038,0.514850974,26.10000038,100.5144119,100.7080078,0.639999986,1.700000048,270,,-70,0.132960245,16.79999924,0.511726975,26.29999924,100.5876923,84.22851563,0.860000014,2.700000048,257,,-35,0.150564432,19.20000076,0.471466631,27.29999924,100.5583801,375.3662109,,,,,0,0.117897563,22.20000076,0.468702257,27.5,100.675621,371.7041016,1.389999986,4.599999905,225,,15,23,0.169197802,100.6756229,0.463259612,27.6,401.0009766,,,,,30
2016-07-01 18:00:00,0.140333071,17.70000076,0.500056386,26.10000038,100.5144119,34.79003906,0.49000001,1.899999976,237,,-70,0.132960245,16.89999962,0.485515714,26.60000038,100.5876923,38.45214844,0.639999986,2.700000048,234,,-35,0.1497197,19.5,0.449786484,27.70000076,100.5437241,316.7724609,,,,,0,0.116998233,22.20000076,0.444489509,27.79999924,100.660965,280.1513672,1.350000024,4.199999809,220,,15,22.9,0.168791424,100.6756229,0.44439983,27.7,314.9414063,,,,,30
2016-07-01 19:00:00,0.139902279,17.79999924,0.574301183,25.20000076,100.5144119,23.80371094,0.209999993,1,194,,-70,0.132960245,17,0.547927499,25.89999962,100.5876923,40.28320313,0.280000001,0.899999976,197,,-35,0.14929679,19.70000076,0.47680521,27.60000038,100.5437241,208.7402344,,,,,0,0.116548009,22.10000038,0.455077201,27.5,100.660965,188.5986328,1.059999943,3.5,215,,15,22.8,0.1683847,100.6609673,0.455007831,27.4,217.8955078,,,,,30
2016-07-01 20:00:00,0.139471114,17.89999962,0.671014726,23.39999962,100.4997559,3.662109375,0.430000007,0.699999988,122,,-70,0.132960245,17,0.665218055,23.79999924,100.5730362,5.493164063,0.289999992,0.600000024,112,,-35,0.148449913,19.70000076,0.621112347,24.60000038,100.5437241,47.60742188,,,,,0,0.116097413,22,0.641110897,24.5,100.6463089,42.11425781,0.25999999,1.299999952,104,,15,22.6,0.1683847,100.6756229,0.630817234,24.6,49.43847656,,,,,30
2016-07-01 21:00:00,0.139039591,18,0.736925542,21.60000038,100.4997559,0,0.569999993,0.899999976,126,,-70,0.132523268,17.10000038,0.740142822,21.70000076,100.5876923,0,0.479999989,1,114,,-35,0.148449913,19.79999924,0.728578091,21.70000076,100.5583801,0,,,,,0,0.116097413,21.89999962,0.749930203,21.39999962,100.6169968,0,0.370000005,0.800000012,112,,15,22.4,0.1683847,100.704934,0.750590159,21.3,1.831054688,,,,,30
2016-07-01 22:00:00,0.138607711,18,0.78914851,20.39999962,100.4997559,0,0.5,0.899999976,148,,-70,0.132523268,17.10000038,0.796742558,20.5,100.5876923,0,0.540000021,0.899999976,120,,-35,0.148449913,19.79999924,0.784973145,20.39999962,100.5730362,0,,,,,0,0.116097413,21.60000038,0.817469239,20,100.6316528,0,0.360000014,0.800000012,140,,15,22,0.1683847,100.7195896,0.813936012,19.9,0,,,,,30
2016-07-01 23:00:00,0.138607711,18,0.818635762,19.20000076,100.4704437,0,0.620000005,1.399999976,163,,-70,0.132085949,17.10000038,0.818022966,19.29999924,100.5437241,0,0.49000001,0.899999976,124,,-35,0.148449913,19.70000076,0.823754311,19.10000038,100.529068,0,,,,,0,0.116097413,21.20000076,0.849892437,18.60000038,100.5730362,0,0.419999987,1.200000048,189,,15,21.7,0.167977628,100.6756229,0.845222693,18.6,0,,,,,30
2016-07-02 00:00:00,0.138175473,18,0.827507198,18.39999962,100.4264755,0,0.769999981,1.299999952,167,,-70,0.132085949,17.10000038,0.826543748,18.60000038,100.5144119,0,0.649999976,1.100000024,135,,-35,0.14802593,19.60000038,0.842230022,18.29999924,100.4997559,0,,,,,0,0.116097413,20.89999962,0.880148113,17.60000038,100.529068,0,0.409999996,1,198,,15,21.3,0.167162443,100.6463117,0.864212031,17.8,0,,,,,30
2016-07-02 01:00:00,0.138175473,17.89999962,0.850312591,17.60000038,100.3971634,0,0.870000005,1.299999952,172,,-70,0.131648242,17,0.849481165,17.79999924,100.4704437,0,0.839999974,1.399999976,147,,-35,0.14802593,19.39999962,0.865703583,17.5,100.4557877,0,,,,,0,0.116097413,20.60000038,0.899202466,16.89999962,100.4850998,0,0.600000024,1.299999952,207,,15,21,0.166754329,100.6023449,0.882744901,17.1,0,,,,,30
2016-07-02 02:00:00,0.138175473,17.89999962,0.861116588,17.39999962,100.3825073,0,0.699999988,1.5,168,,-70,0.131648242,17,0.876223862,17.39999962,100.4704437,0,0.680000007,1.700000048,141,,-35,0.147601604,19.20000076,0.877174735,17.20000076,100.4557877,0,,,,,0,0.116097413,20.39999962,0.905426025,16.70000076,100.4850998,0,0.5,1.399999976,156,,15,20.7,0.166754329,100.5876893,0.894464277,16.8,0,,,,,30
2016-07-02 03:00:00,0.137742862,17.79999924,0.850691378,17.5,100.3532028,0,0.569999993,1,148,,-70,0.131648242,16.89999962,0.865703583,17.5,100.4411316,0,0.670000017,1.100000024,117,,-35,0.147601604,19.10000038,0.855695426,17.5,100.4264755,0,,,,,0,0.115646444,20.10000038,0.877174735,17.20000076,100.4704437,0,0.600000024,1.100000024,111,,15,20.4,0.166754329,100.5583781,0.877612663,17.1,0,,,,,30
2016-07-02 04:00:00,0.137742862,17.70000076,0.863696754,16.5,100.3238907,0,0.949999988,1.5,165,,-70,0.131210178,16.89999962,0.879691124,16.5,100.4118195,0,0.870000005,1.399999976,138,,-35,0.147176906,18.89999962,0.874576807,16.39999962,100.3971634,0,,,,,0,0.115646444,19.89999962,0.885793626,16.20000076,100.4411316,0,0.670000017,1.5,151,,15,20.1,0.166754329,100.5437225,0.885793621,16.2,0,,,,,30
2016-07-02 05:00:00,0.137309894,17.60000038,0.874359667,16.5,100.3092346,0,0.930000007,1.600000024,159,,-70,0.131210178,16.79999924,0.890354037,16.5,100.3971634,0,0.829999983,1.299999952,131,,-35,0.147176906,18.79999924,0.89067328,16.39999962,100.3825073,5.493164063,,,,,0,0.115646444,19.70000076,0.914001584,15.89999962,100.4264755,9.155273438,0.550000012,1.600000024,154,,15,19.9,0.166345867,100.5290669,0.902676244,16,10.98632813,,,,,30
2016-07-02 06:00:00,0.137309894,17.60000038,0.866975009,17.20000076,100.2945786,5.493164063,0.779999971,1.299999952,159,,-70,0.131210178,16.70000076,0.876711667,17.29999924,100.3678589,5.493164063,0.720000029,1.299999952,133,,-35,0.146751866,18.60000038,0.877174735,17.20000076,100.3532028,12.81738281,,,,,0,0.115646444,19.5,0.899202466,16.89999962,100.3971634,20.14160156,0.409999996,1.299999952,157,,15,19.6,0.166345867,100.4997557,0.877174727,17.2,25.63476563,,,,,30
2016-07-02 07:00:00,0.136876568,17.5,0.863901675,18.60000038,100.2506104,23.80371094,0.589999974,1.299999952,157,,-70,0.130771756,16.70000076,0.877075434,18.70000076,100.3385468,23.80371094,0.479999989,1,125,,-35,0.146751866,18.5,0.888124585,18.5,100.3238907,20.14160156,,,,,0,0.115646444,19.29999924,0.881716073,18.70000076,100.3825073,153.8085938,0.200000003,1.399999976,121,,15,19.4,0.166345867,100.455789,0.829227921,19.6,173.9501953,,,,,30
2016-07-02 08:00:00,0.13644287,17.39999962,0.815672338,20.70000076,100.2212982,38.45214844,0.449999988,1.200000048,132,,-70,0.130332962,16.60000038,0.849583209,20.60000038,100.3092346,47.60742188,0.409999996,1,80,,-35,0.146326452,18.39999962,0.855954766,20.39999962,100.2945786,29.296875,,,,,0,0.115646444,19.20000076,0.783468187,21.60000038,100.3678589,120.8496094,0.319999993,2.599999905,171,,15,19.3,0.165937056,100.4264778,0.681445026,23.4,377.1972656,,,,,30
2016-07-02 09:00:00,0.136008814,17.39999962,0.739074707,22.79999924,100.2066422,75.07324219,0.400000006,1.200000048,146,,-70,0.130332962,16.60000038,0.772587478,22.70000076,100.2945786,64.08691406,0.349999994,1,104,,-35,0.145900697,18.39999962,0.790486813,22.39999962,100.2652664,38.45214844,,,,,0,0.115646444,19.29999924,0.718817115,23.5,100.3532028,216.0644531,0.379999995,3.299999952,197,,15,19.5,0.165527898,100.382511,0.604005425,25.5,510.8642578,,,,,30
2016-07-02 10:00:00,0.135574386,17.29999924,0.644357085,25,100.17733,124.5117188,0.449999988,1.299999952,163,,-70,0.12989381,16.60000038,0.660921633,24.89999962,100.2652664,84.22851563,0.379999995,1.5,141,,-35,0.145474568,18.39999962,0.668074787,24.79999924,100.2359543,95.21484375,,,,,0,0.115646444,19.39999962,0.573528588,26.79999924,100.3385468,626.2207031,0.75,3.599999905,222,,15,20,0.165937056,100.3531998,0.53212316,27.3,620.7275391,,,,,30
2016-07-02 11:00:00,0.135139614,17.39999962,0.607340693,24.79999924,100.162674,45.77636719,1.090000033,3.299999952,290,,-70,0.12989381,16.60000038,0.590290844,25.10000038,100.2506104,49.43847656,1.590000033,5.199999809,273,,-35,0.144621253,18.39999962,0.570593536,25.39999962,100.2212982,113.5253906,,,,0.05,0,0.114743389,19.70000076,0.553915799,25.89999962,100.3238907,258.1787109,1.529999971,6.599999905,248,,15,20.6,0.166345867,100.3385442,0.544693604,26,269.1650391,,,,,30
2016-07-02 12:00:00,0.134704471,17.5,0.710427344,22.20000076,100.2066422,21.97265625,1.350000024,4.099999905,286,0.3,-70,0.129454285,16.70000076,0.701834083,22.39999962,100.2945786,23.80371094,1.940000057,5,274,0.3,-35,0.143766493,18.60000038,0.690238416,22.5,100.2799225,73.2421875,,,,0.45,0,0.114743389,20,0.689708352,22.60000038,100.3532028,117.1875,1.49000001,7.900000095,264,2.2,15,21.1,0.166754329,100.4118222,0.686059079,22.6,126.3427734,,,,1.2,30
2016-07-02 13:00:00,0.134704471,17.60000038,0.918664217,19.79999924,100.2212982,53.10058594,0.519999981,3.200000048,284,0.15,-70,0.12989381,16.79999924,0.943132222,19.89999962,100.3092346,58.59375,0.75,5.5,269,0.05,-35,0.143766493,18.70000076,0.906059384,20.39999962,100.2945786,150.1464844,,,,0.1,0,0.116097413,20.20000076,0.892139554,20.79999924,100.3532028,254.5166016,0.899999976,5.099999905,239,0.4,15,21.1,0.166754329,100.4411334,0.88666758,20.9,272.8271484,,,,,30
2016-07-02 14:00:00,0.134704471,17.60000038,0.866021812,18.29999924,100.3092346,10.98632813,1.50999999,3.599999905,310,0.5,-70,0.129454285,16.89999962,0.864629269,18.5,100.4118195,12.81738281,2.589999914,5.599999905,293,0.45,-35,0.143766493,18.70000076,0.849892437,18.60000038,100.3971634,43.9453125,,,,0.4,0,0.116097413,20.29999924,0.853872359,18.70000076,100.4557877,65.91796875,1.610000014,8,318,4.6,15,21.1,0.166345867,100.5437225,0.853872378,18.7,73.2421875,,,,,30
2016-07-02 15:00:00,0.135574386,17.70000076,0.933597326,16.39999962,100.4411316,9.155273438,1.320000052,2.900000095,295,0.65,-70,0.130332962,16.89999962,0.94900012,16.5,100.5144119,10.98632813,2.039999962,3.799999952,279,0.4,-35,0.143766493,18.79999924,0.937686324,16.60000038,100.5144119,32.95898438,,,,0.4,0,0.116998233,20.29999924,0.937010705,16.70000076,100.5583801,56.76269531,1.25999999,5.300000191,284,2.4,15,21,0.165937056,100.6609673,0.937010678,16.7,62.25585938,,,,,30
2016-07-02 16:00:00,0.135574386,17.70000076,0.925439656,15.80000019,100.4850998,27.46582031,1.00999999,2.200000048,288,0.05,-70,0.130771756,16.89999962,0.935701013,16,100.5583801,31.12792969,1.49000001,3.099999905,275,0.05,-35,0.144194052,18.79999924,0.912965178,16.20000076,100.5583801,80.56640625,,,,0.05,0,0.116998233,20.10000038,0.917963684,16.29999924,100.6023483,139.1601563,1.149999976,3.599999905,270,0.6,15,20.8,0.165527898,100.704934,0.923363441,16.3,151.9775391,,,,,30
2016-07-02 17:00:00,0.135139614,17.70000076,0.926071227,15.60000038,100.4850998,18.31054688,0.409999996,1.200000048,260,0.05,-70,0.131648242,16.89999962,0.942602277,15.69999981,100.5583801,20.14160156,0.540000021,1.899999976,253,,-35,0.145474568,18.70000076,0.908180356,16,100.5437241,60.42480469,,,,,0,0.116998233,20,0.907869816,16.10000038,100.6023483,95.21484375,0.790000021,3,237,,15,20.6,0.165937056,100.704934,0.913338884,16.1,106.2011719,,,,,30
2016-07-02 18:00:00,0.135139614,17.60000038,0.926583886,15.39999962,100.4997559,20.14160156,0.379999995,1.100000024,238,,-70,0.132960245,16.89999962,0.937364757,15.60000038,100.5730362,21.97265625,0.449999988,1.399999976,228,,-35,0.146751866,18.60000038,0.902676225,16,100.5730362,65.91796875,,,,,0,0.116998233,19.89999962,0.902400672,16.10000038,100.6169968,106.2011719,1,3.700000048,214,,15,20.4,0.165937056,100.7342452,0.902400694,16.1,115.3564453,,,,,30
2016-07-02 19:00:00,0.135574386,17.60000038,0.920659542,15.5,100.5437241,9.155273438,0.340000004,1,225,,-70,0.134268954,16.79999924,0.936991513,15.69999981,100.6169968,10.98632813,0.389999986,1.200000048,209,,-35,0.148449913,18.5,0.891462505,16.10000038,100.6023483,43.9453125,,,,,0,0.116998233,19.70000076,0.896931589,16.10000038,100.660965,62.25585938,0.850000024,3.400000095,212,,15,20.3,0.166345867,100.778212,0.902400694,16.1,69.58007813,,,,,30
2016-07-02 20:00:00,0.135574386,17.5,0.869603455,15.60000038,100.5876923,9.155273438,0.579999983,1.600000024,257,,-70,0.135139614,16.79999924,0.864146948,15.89999962,100.6902771,14.6484375,0.75999999,2,256,,-35,0.1497197,18.5,0.826167285,16.29999924,100.675621,82.39746094,,,,,0,0.116548009,19.60000038,0.82628727,16.39999962,100.7342453,76.90429688,1.059999943,3.400000095,234,,15,20.1,0.166754329,100.8221788,0.831567075,16.3,97.04589844,,,,,30
2016-07-02 21:00:00,0.136008814,17.39999962,0.901883245,14.10000038,100.7049332,0,0.389999986,0.899999976,192,,-70,0.136008814,16.70000076,0.908694625,14.30000019,100.7928696,0,0.439999998,0.800000012,159,,-35,0.150986269,18.39999962,0.896414995,14.30000019,100.7782135,1.831054688,,,,,0,0.116548009,19.5,0.896058142,14.19999981,100.8221817,1.831054688,0.699999988,2.599999905,186,,15,19.9,0.166754329,100.924768,0.901883265,14.1,3.662109375,,,,,30
2016-07-02 22:00:00,0.136008814,17.39999962,0.911320865,13.39999962,100.7195892,0,0.340000004,0.899999976,223,,-70,0.13644287,16.70000076,0.930849135,13.39999962,100.8221817,0,0.319999993,0.899999976,199,,-35,0.151407763,18.29999924,0.917830288,13.39999962,100.8221817,0,,,,,0,0.116097413,19.20000076,0.917282641,13.30000019,100.8514862,0,0.560000002,2.099999905,185,,15,19.5,0.167570209,100.9540791,0.9232882,13.2,0,,,,,30
2016-07-02 23:00:00,0.13644287,17.29999924,0.908705294,13,100.7195892,0,0.389999986,0.899999976,261,,-70,0.136876568,16.60000038,0.91606158,13.10000038,100.8221817,0,0.400000006,1.100000024,254,,-35,0.152670071,18.20000076,0.902785301,13.10000038,100.8221817,0,,,,,0,0.116097413,19,0.914668798,12.89999962,100.8514862,0,0.479999989,1.5,184,,15,19.1,0.167977628,100.9540791,0.920676173,12.8,0,,,,,30
2016-07-03 00:00:00,0.13644287,17.20000076,0.950620532,12.19999981,100.7635574,0,0.469999999,0.800000012,142,,-70,0.137309894,16.60000038,0.972370267,12.30000019,100.8661423,0,0.449999988,0.800000012,114,,-35,0.153090134,18,0.958379328,12.30000019,100.8514862,0,,,,,0,0.116097413,18.70000076,0.964703798,12.19999981,100.8954544,0,0.360000014,0.899999976,109,,15,18.8,0.1683847,100.9980459,0.963986852,12.1,0,,,,,30
2016-07-03 01:00:00,0.13644287,17.10000038,0.965051532,11.39999962,100.7928696,0,0.439999998,0.899999976,113,,-70,0.137742862,16.5,0.988182783,11.5,100.8661423,0,0.409999996,0.899999976,91,,-35,0.153090134,17.89999962,0.987321973,11.39999962,100.8954544,0,,,,,0,0.116097413,18.39999962,0.986411273,11.30000019,100.9394226,0,0.419999987,0.899999976,89,,15,18.5,0.1683847,101.0273571,0.985450076,11.2,0,,,,,30
2016-07-03 02:00:00,0.136876568,17,0.974582136,10.89999962,100.8368378,0,0.529999971,1.5,142,,-70,0.137742862,16.39999962,0.998619258,11,100.9101105,0,0.479999989,1,106,,-35,0.153929189,17.79999924,0.990996242,11,100.9247665,0,,,,,0,0.116097413,18.20000076,0.989929914,10.89999962,100.9687347,0,0.49000001,1.200000048,113,,15,18.2,0.168791424,101.0566683,0.989929899,10.9,0,,,,,30
2016-07-03 03:00:00,0.136876568,16.79999924,0.970752358,10.60000038,100.8514862,0,0.409999996,1.700000048,150,,-70,0.137742862,16.29999924,0.995414019,10.69999981,100.9394226,0,0.340000004,0.899999976,115,,-35,0.15434818,17.60000038,0.994238317,10.60000038,100.9394226,0,,,,,0,0.116097413,17.89999962,0.9930076,10.5,100.9980469,0,0.430000007,1.299999952,127,,15,17.9,0.169197802,101.0859795,0.991721281,10.4,0,,,,,30
2016-07-03 04:00:00,0.137309894,16.70000076,0.96641773,10.30000019,100.8807983,0,0.270000011,0.699999988,155,,-70,0.137742862,16.20000076,0.991721272,10.39999962,100.9687347,0,0.209999993,0.600000024,116,,-35,0.15434818,17.39999962,0.982391536,10.30000019,100.9687347,0,,,,,0,0.115646444,17.70000076,0.980937958,10.19999981,101.0127029,0,0.310000002,1.100000024,142,,15,17.6,0.169603833,101.1299463,0.980937937,10.2,0,,,,,30
2016-07-03 05:00:00,0.137309894,16.60000038,0.966272235,9.800000191,100.9247665,0,0.430000007,0.800000012,164,,-70,0.137742862,16.10000038,0.992630303,9.899999619,101.0127029,0,0.300000012,0.699999988,138,,-35,0.15434818,17.29999924,0.984426737,9.899999619,101.0127029,3.662109375,,,,,0,0.115646444,17.5,0.982789695,9.800000191,101.0420151,7.32421875,0.360000014,2.200000048,134,,15,17.3,0.169603833,101.173913,0.989405611,9.7,9.155273438,,,,,30
2016-07-03 06:00:00,0.137309894,16.39999962,0.979425907,10.10000038,100.9540787,5.493164063,0.25,0.800000012,169,,-70,0.137742862,16,1.005059361,10.19999981,101.0420151,5.493164063,0.219999999,0.899999976,245,,-35,0.15434818,17.10000038,0.978581011,10.60000038,101.0420151,12.81738281,,,,,0,0.115646444,17.20000076,0.985126615,10.5,101.0859833,21.97265625,0.469999999,2.099999905,203,,15,17.1,0.169603833,101.2032242,0.985126616,10.5,29.296875,,,,,30
2016-07-03 07:00:00,0.137309894,16.29999924,0.933683991,11.89999962,100.9833908,23.80371094,0.540000021,2,259,,-70,0.137742862,15.89999962,0.936537266,12.19999981,101.0859833,21.97265625,0.75,1.700000048,269,,-35,0.154766828,17,0.91040349,12.39999962,101.0713272,18.31054688,,,,,0,0.115646444,17,0.912247002,12.60000038,101.1299438,161.1328125,0.949999988,2.799999952,241,,15,16.9,0.170009517,101.2178798,0.902785326,13.1,197.7539063,,,,,30
2016-07-03 08:00:00,0.137309894,16.20000076,0.842626154,13.69999981,101.0127029,43.9453125,0.800000012,2.099999905,265,,-70,0.137742862,15.80000019,0.838047981,13.89999962,101.1299438,67.74902344,0.99000001,2.900000095,258,,-35,0.154766828,16.79999924,0.813845634,14,101.1006317,23.80371094,,,,,0,0.115646444,16.89999962,0.80610317,14.5,101.173912,102.5390625,1.409999967,3.200000048,226,,15,16.8,0.170009517,101.247191,0.747819493,15.9,468.75,,,,,30
2016-07-03 09:00:00,0.137309894,16.10000038,0.727434695,15.5,101.0420151,91.55273438,0.879999995,1.799999952,276,,-70,0.137742862,15.69999981,0.717140496,15.60000038,101.1445999,64.08691406,1.200000048,3.299999952,269,,-35,0.15434818,16.79999924,0.691292286,15.80000019,101.1152878,38.45214844,,,,,0,0.115195103,16.79999924,0.672803223,16.60000038,101.2032242,217.8955078,1.370000005,6.099999905,241,,15,16.9,0.170009517,101.2618466,0.618697249,17.8,606.0791016,,,,,30
2016-07-03 10:00:00,0.137309894,16,0.62494725,17,101.027359,128.1738281,0.949999988,2.299999952,271,,-70,0.137742862,15.69999981,0.605604053,17.10000038,101.1299438,67.74902344,1.220000029,3.700000048,268,,-35,0.15434818,16.70000076,0.582785189,17.29999924,101.1006317,93.38378906,,,,,0,0.114291303,16.79999924,0.549791455,18.5,101.2032242,662.8417969,1.789999962,6.400000095,237,,15,17.2,0.170009517,101.247191,0.534955666,18.8,644.53125,,,,,30
2016-07-03 11:00:00,0.137309894,16,0.56246984,18,101.0127029,181.2744141,1.149999976,3,284,,-70,0.137309894,15.69999981,0.539671183,18.10000038,101.1006317,140.9912109,1.470000029,4,273,,-35,0.15434818,16.70000076,0.521596968,18.5,101.0859833,139.1601563,,,,,0,0.113838844,17.10000038,0.495781779,19.60000038,101.2032242,745.2392578,1.730000019,6.099999905,246,,15,17.8,0.170414855,101.2325354,0.488352614,19.7,726.9287109,,,,,30
2016-07-03 12:00:00,0.137309894,16.10000038,0.539567351,18.79999924,100.9980469,170.2880859,0.959999979,2.700000048,267,,-70,0.137309894,15.69999981,0.522458017,18.89999962,101.0859833,164.7949219,1.159999967,4.599999905,263,,-35,0.153929189,16.79999924,0.500647902,19.29999924,101.0566711,181.2744141,,,,,0,0.113386005,17.5,0.483144432,20.29999924,101.173912,697.6318359,1.74000001,5.300000191,233,,15,18.6,0.170819847,101.2032242,0.471818956,20.4,690.3076172,,,,,30
2016-07-03 13:00:00,0.136876568,16.10000038,0.57938689,18.20000076,100.9540787,93.38378906,0.910000026,4.199999809,285,,-70,0.136876568,15.80000019,0.560233593,18.20000076,101.0420151,115.3564453,1.25,5.400000095,276,0.05,-35,0.15350984,16.79999924,0.545092344,18.5,101.027359,254.5166016,,,,0.1,0,0.113386005,18.10000038,0.53526181,19.20000076,101.1152878,567.6269531,1.529999971,5.800000191,235,0.2,15,19.4,0.171224493,101.1592574,0.536408495,19.3,563.9648438,,,,0.2,30
2016-07-03 14:00:00,0.13644287,16.20000076,0.683126926,17.89999962,100.8954544,287.4755859,0.479999989,1.600000024,114,,-70,0.136876568,15.80000019,0.663609028,17.89999962,100.9833908,126.3427734,0.529999971,1.600000024,82,,-35,0.153090134,17,0.581109226,19.29999924,100.9687347,624.3896484,,,,,0,0.113838844,18.70000076,0.545998573,19.79999924,101.0713272,640.8691406,0.899999976,3.799999952,225,,15,20.2,0.171224493,101.1152907,0.516784769,19.9,637.2070313,,,,,30
2016-07-03 15:00:00,0.13644287,16.29999924,0.589237809,19.20000076,100.8807983,82.39746094,0.620000005,2,237,,-70,0.136876568,15.89999962,0.573061526,19.39999962,100.9687347,67.74902344,0.709999979,3.200000048,283,,-35,0.153090134,17.20000076,0.529358268,20.29999924,100.9247665,338.7451172,,,,,0,0.113386005,19.29999924,0.511399627,20.60000038,101.0420151,391.8457031,1.039999962,5.199999809,242,,15,20.6,0.171224493,101.0713239,0.495961585,20.7,406.4941406,,,,,30
2016-07-03 16:00:00,0.13644287,16.39999962,0.445412576,20.60000038,100.8661423,69.58007813,1.220000029,2.799999952,283,,-70,0.136876568,16,0.433212012,20.89999962,100.9394226,84.22851563,1.75999999,4.900000095,272,,-35,0.152670071,17.5,0.399851054,21.89999962,100.9247665,600.5859375,,,,,0,0.113386005,19.60000038,0.398765475,22.10000038,101.0420151,554.8095703,1.830000043,5.699999809,247,,15,20.7,0.171224493,101.0566683,0.395003537,22.1,574.9511719,,,,,30
2016-07-03 17:00:00,0.13644287,16.5,0.42773813,20.79999924,100.8368378,148.3154297,1.080000043,2.799999952,277,,-70,0.13644287,16,0.41192311,21.10000038,100.9247665,104.3701172,1.50999999,4.400000095,267,,-35,0.152249649,17.70000076,0.38461864,21.89999962,100.8954544,474.2431641,,,,,0,0.112932801,19.79999924,0.381387323,22.20000076,101.0127029,439.453125,1.75,6.800000191,240,,15,20.7,0.171224493,101.0273571,0.377648219,22.2,477.9052734,,,,,30
2016-07-03 18:00:00,0.136008814,16.60000038,0.421714276,20.39999962,100.8514862,29.296875,1.190000057,2.700000048,295,,-70,0.13644287,16.10000038,0.409885615,20.70000076,100.9247665,29.296875,1.860000014,3.599999905,282,,-35,0.151828885,17.89999962,0.391096979,21.29999924,100.9101105,227.0507813,,,,,0,0.112479217,19.79999924,0.390236348,21.5,101.027359,212.4023438,1.379999995,4.900000095,273,,15,20.6,0.171224493,101.0420127,0.386333997,21.5,234.375,,,,,30
2016-07-03 19:00:00,0.136008814,16.70000076,0.488657147,19.39999962,100.8954544,16.47949219,0.939999998,2.5,312,,-70,0.13644287,16.10000038,0.473844528,19.60000038,100.9687347,20.14160156,1.590000033,3.700000048,299,,-35,0.151407763,18,0.455127895,20.10000038,100.9540787,131.8359375,,,,,0,0.112025261,19.60000038,0.45373562,20.29999924,101.0713272,131.8359375,0.980000019,3.799999952,327,,15,20.4,0.170819847,101.0859795,0.453735634,20.3,146.484375,,,,,30
2016-07-03 20:00:00,0.136008814,16.70000076,0.679069519,16.70000076,100.9540787,3.662109375,0.769999981,3.299999952,291,0.25,-70,0.13644287,16.10000038,0.654910445,16.89999962,101.0420151,5.493164063,1.169999957,5.199999809,282,0.3,-35,0.151407763,18.10000038,0.649712741,16.89999962,101.027359,31.12792969,,,,0.45,0,0.112479217,19.5,0.665305853,16.89999962,101.1006317,32.95898438,0.930000007,4.800000191,265,2.2,15,20.1,0.170819847,101.173913,0.670503566,16.9,36.62109375,,,,1,30
2016-07-03 21:00:00,0.136008814,16.70000076,0.927445829,12.80000019,100.9833908,3.662109375,0.589999974,1.200000048,113,0.1,-70,0.13644287,16.10000038,0.941570818,12.89999962,101.0713272,3.662109375,0.610000014,1.100000024,101,,-35,0.151407763,18.10000038,0.940985203,12.80000019,101.0566711,7.32421875,,,,,0,0.113838844,19.29999924,0.94775486,12.80000019,101.1152878,20.14160156,0.600000024,1.399999976,105,,15,19.8,0.170414855,101.2032242,0.947754884,12.8,21.97265625,,,,,30
2016-07-03 22:00:00,0.136008814,16.70000076,0.94438839,12.30000019,101.0566711,0,0.370000005,1.100000024,125,,-70,0.13644287,16.10000038,0.979365766,12.30000019,101.1299438,0,0.340000004,1,108,,-35,0.151828885,18,0.971745431,12.19999981,101.1445999,0,,,,,0,0.113386005,18.89999962,0.978163123,12.10000038,101.1885681,0,0.310000002,1.399999976,96,,15,19.4,0.170009517,101.2765022,0.977493366,12,0,,,,,30
2016-07-03 23:00:00,0.136008814,16.70000076,0.966059327,11.5,101.1006317,0,0.519999981,0.800000012,140,,-70,0.13644287,16.10000038,0.988994479,11.60000038,101.173912,0,0.449999988,0.800000012,120,,-35,0.151828885,17.79999924,0.988182783,11.5,101.1885681,0,,,,,0,0.113386005,18.60000038,0.994745433,11.39999962,101.2325363,0,0.389999986,0.800000012,115,,15,18.9,0.170009517,101.3351246,0.992972596,11.2,0,,,,,30
2016-07-04 00:00:00,0.135574386,16.60000038,0.963992834,11.30000019,101.1299438,0,0.469999999,0.699999988,135,,-70,0.136008814,16,0.994745433,11.39999962,101.2178802,0,0.449999988,0.699999988,114,,-35,0.151828885,17.60000038,0.993884087,11.30000019,101.2178802,0,,,,,0,0.113386005,18.29999924,1.000495076,11.19999981,101.2618484,0,0.439999998,0.899999976,107,,15,18.5,0.170009517,101.3644358,0.99861926,11,0,,,,,30
2016-07-04 01:00:00,0.135574386,16.5,0.9656353,10.80000019,101.1445999,0,0.340000004,1.899999976,116,,-70,0.136008814,15.89999962,0.996535599,10.80000019,101.2178802,0,0.340000004,0.600000024,73,,-35,0.151828885,17.5,0.988810539,10.80000019,101.2325363,0,,,,,0,0.113386005,18,0.994238317,10.60000038,101.2618484,0,0.330000013,0.699999988,95,,15,18.2,0.170009517,101.3790914,0.998365393,10.3,0,,,,,30
2016-07-04 02:00:00,0.135574386,16.39999962,0.96641773,10.30000019,101.159256,0,0.219999999,1.799999952,88,,-70,0.136008814,15.89999962,0.998365402,10.30000019,101.2178802,0,0.300000012,0.600000024,48,,-35,0.152249649,17.29999924,0.997018874,10.19999981,101.2325363,0,,,,,0,0.112932801,17.70000076,0.995614767,10.10000038,101.2911606,0,0.439999998,2.299999952,92,,15,17.8,0.170009517,101.3790914,1.007565889,9.8,0,,,,,30
2016-07-04 03:00:00,0.135574386,16.20000076,0.974530935,9.800000191,101.159256,0,0.370000005,0.699999988,132,,-70,0.136008814,15.80000019,1.007565856,9.800000191,101.2325363,0,0.319999993,0.699999988,85,,-35,0.152249649,17.10000038,1.006034255,9.699999809,101.2325363,0,,,,,0,0.112932801,17.39999962,0.997719944,9.699999809,101.2911606,0,0.430000007,2.5,107,,15,17.5,0.170009517,101.3937469,1.009554293,9.4,0,,,,,30
2016-07-04 04:00:00,0.135574386,16.10000038,0.973667502,9.300000191,101.1885681,0,0.400000006,1.100000024,152,,-70,0.136008814,15.69999981,1.009554267,9.399999619,101.2178802,0,0.349999994,0.800000012,112,,-35,0.152249649,17,1.007831216,9.300000191,101.2325363,0,,,,,0,0.112932801,17.20000076,1.006044388,9.199999809,101.3058167,0,0.409999996,0.800000012,118,,15,17.1,0.169603833,101.3937469,1.010990666,9,0,,,,,30
2016-07-04 05:00:00,0.135574386,16,0.976128936,9,101.2032242,0,0.49000001,1,160,,-70,0.136008814,15.60000038,1.01099062,9,101.2471924,1.831054688,0.379999995,0.800000012,134,,-35,0.152249649,16.79999924,1.01099062,9,101.2618484,7.32421875,,,,,0,0.112932801,16.89999962,1.002275229,9,101.3204727,12.81738281,0.360000014,0.699999988,129,,15,16.8,0.169603833,101.4084025,1.009065744,8.9,18.31054688,,,,,30
2016-07-04 06:00:00,0.135139614,15.89999962,0.989405632,9.699999809,101.2178802,7.32421875,0.379999995,1,171,,-70,0.136008814,15.5,1.017241001,9.899999619,101.2765045,5.493164063,0.230000004,0.699999988,159,,-35,0.152249649,16.60000038,1.002300978,10,101.2765045,14.6484375,,,,,0,0.112932801,16.70000076,1.003709197,10.10000038,101.3497772,32.95898438,0.310000002,0.800000012,147,,15,16.6,0.169603833,101.4377137,1.011803599,10.1,42.11425781,,,,,30
2016-07-04 07:00:00,0.135139614,15.80000019,0.979898512,11.39999962,101.2325363,20.14160156,0.300000012,1.799999952,215,,-70,0.136008814,15.39999962,1.004312992,11.69999981,101.3058167,21.97265625,0.379999995,1,267,0.05,-35,0.152249649,16.5,0.963986874,12.10000038,101.3058167,20.14160156,,,,,0,0.112932801,16.5,0.959050953,12.39999962,101.3497772,161.1328125,0.680000007,1.899999976,225,,15,16.4,0.169603833,101.4523693,0.948296321,12.9,192.2607422,,,,,30
2016-07-04 08:00:00,0.135139614,15.69999981,0.888456881,13.89999962,101.2471924,43.9453125,0.699999988,1.5,267,,-70,0.135574386,15.30000019,0.883698702,14.19999981,101.3497772,64.08691406,1.00999999,2.5,271,,-35,0.152249649,16.39999962,0.865715861,14.30000019,101.3351212,25.63476563,,,,,0,0.112479217,16.39999962,0.856036007,14.80000019,101.3937454,98.87695313,1.139999986,3.299999952,256,,15,16.3,0.169603833,101.4816805,0.809106146,16,468.75,,,,,30
2016-07-04 09:00:00,0.134704471,15.60000038,0.769341409,15.80000019,101.2765045,93.38378906,0.829999983,1.899999976,266,,-70,0.135574386,15.30000019,0.748560786,16,101.3644333,56.76269531,1.149999976,2.599999905,265,,-35,0.151828885,16.29999924,0.732858717,16.10000038,101.3497772,31.12792969,,,,,0,0.112479217,16.39999962,0.721848369,16.79999924,101.4230576,212.4023438,1.399999976,4.300000191,242,,15,16.5,0.170009517,101.4963361,0.656,18.2,595.0927734,,,,,30
2016-07-04 10:00:00,0.134704471,15.5,0.660536826,17.5,101.2765045,137.3291016,1.029999971,2.599999905,275,,-70,0.135574386,15.19999981,0.636491299,17.60000038,101.3790894,62.25585938,1.5,3.799999952,274,,-35,0.151407763,16.29999924,0.623607516,17.79999924,101.3497772,58.59375,,,,,0,0.111570932,16.39999962,0.580241799,19.20000076,101.4377136,699.4628906,1.720000029,5.300000191,253,,15,16.9,0.170009517,101.4963361,0.56417688,19.4,661.0107422,,,,,30
2016-07-04 11:00:00,0.134704471,15.5,0.551029146,18.60000038,101.2471924,188.5986328,1.230000019,2.400000095,287,,-70,0.135139614,15.19999981,0.53034395,18.79999924,101.3351212,120.8496094,1.799999952,4.699999809,277,,-35,0.151407763,16.29999924,0.515977979,19.10000038,101.3058167,115.3564453,,,,,0,0.110661156,16.70000076,0.488520503,20.39999962,101.4230576,712.2802734,1.639999986,6.099999905,257,,15,17.5,0.170009517,101.4523693,0.481365313,20.5,701.2939453,,,,,30
2016-07-04 12:00:00,0.134268954,15.60000038,0.494960219,18.89999962,101.2325363,65.91796875,1.200000048,2.5,293,,-70,0.135139614,15.30000019,0.47228986,19.20000076,101.3058167,62.25585938,1.960000038,4.300000191,282,,-35,0.151407763,16.39999962,0.463553756,19.5,101.2911606,144.6533203,,,,,0,0.110661156,17.10000038,0.450874358,20.10000038,101.3937454,318.6035156,1.409999967,5,274,,15,18.3,0.170414855,101.4230581,0.446620833,20.1,327.7587891,,,,,30
2016-07-04 13:00:00,0.133833081,15.69999981,0.46945709,19.60000038,101.2032242,80.56640625,0.980000019,2.200000048,277,,-70,0.135139614,15.39999962,0.450665474,19.79999924,101.2765045,87.890625,1.330000043,3,270,,-35,0.150564432,16.39999962,0.431184918,20.20000076,101.2618484,243.5302734,,,,,0,0.110205702,17.5,0.421065897,20.89999962,101.3790894,488.8916016,1.570000052,6,240,,15,18.8,0.170414855,101.3937469,0.419921604,21.1,492.5537109,,,,,30
2016-07-04 14:00:00,0.133833081,15.80000019,0.43424046,20.39999962,101.1885681,168.4570313,1.120000005,2.299999952,303,,-70,0.134704471,15.39999962,0.416543245,20.60000038,101.2618484,98.87695313,1.799999952,3.799999952,288,,-35,0.150142252,16.60000038,0.392633617,21.39999962,101.2325363,507.2021484,,,,,0,0.110205702,17.89999962,0.387479663,22.10000038,101.3644333,591.4306641,1.320000052,4.5,291,,15,19.2,0.170414855,101.3790914,0.379072806,22.3,615.234375,,,,,30
2016-07-04 15:00:00,0.133396849,15.89999962,0.38870728,21.39999962,101.1445999,139.1601563,1.080000043,2.5,283,,-70,0.134704471,15.5,0.372341335,21.60000038,101.2178802,164.7949219,1.620000005,3.799999952,270,,-35,0.14929679,16.79999924,0.350328028,22.60000038,101.2032242,677.4902344,,,,,0,0.109749876,18.39999962,0.342785537,23.29999924,101.3351212,695.8007813,1.519999981,7.199999809,254,,15,19.6,0.170819847,101.3351246,0.339287719,23.3,712.2802734,,,,,30
2016-07-04 16:00:00,0.132960245,15.89999962,0.375479907,21.79999924,101.1152878,82.39746094,0.910000026,2.799999952,260,,-70,0.134704471,15.60000038,0.362691849,22.20000076,101.1885681,98.87695313,1.159999967,3.5,252,,-35,0.148449913,17,0.33229211,23.29999924,101.173912,681.1523438,,,,,0,0.109293669,19.10000038,0.331202358,23.70000076,101.3058167,629.8828125,1.779999971,5.400000095,226,,15,20.1,0.170819847,101.2911578,0.325821085,23.8,661.0107422,,,,,30
2016-07-04 17:00:00,0.132523268,16.10000038,0.40120393,22,101.0859833,161.1328125,0.790000021,2.299999952,260,,-70,0.134268954,15.69999981,0.38416183,22.39999962,101.173912,104.3701172,1.039999962,2.599999905,257,,-35,0.147601604,17.29999924,0.352496862,23.5,101.159256,552.9785156,,,,,0,0.10883709,19.5,0.3516891,23.70000076,101.2765045,499.8779297,1.649999976,5.199999809,239,,15,20.3,0.170414855,101.2765022,0.348274646,23.7,536.4990234,,,,,30
2016-07-04 18:00:00,0.132523268,16.20000076,0.438502669,21.29999924,101.0713272,40.28320313,0.569999993,1.799999952,258,,-70,0.134268954,15.69999981,0.41379419,21.79999924,101.1445999,43.9453125,0.810000002,2.700000048,246,,-35,0.147176906,17.60000038,0.377554059,23,101.1299438,373.5351563,,,,,0,0.108380139,19.60000038,0.375276625,23.10000038,101.2471924,325.9277344,1.429999948,4.300000191,224,,15,20.4,0.170414855,101.2618466,0.371736294,23.1,362.5488281,,,,,30
2016-07-04 19:00:00,0.132085949,16.29999924,0.504150689,20.29999924,101.0566711,14.6484375,0.310000002,0.800000012,190,,-70,0.134268954,15.80000019,0.465049237,21.20000076,101.1299438,36.62109375,0.349999994,0.899999976,182,,-35,0.146751866,17.79999924,0.403862894,22.5,101.1006317,203.2470703,,,,,0,0.107922807,19.60000038,0.398937285,22.39999962,101.2325363,166.6259766,0.939999998,3.400000095,220,,15,20.3,0.170009517,101.247191,0.397654806,22.3,195.9228516,,,,,30
2016-07-04 20:00:00,0.132085949,16.39999962,0.590036869,18.29999924,101.027359,0,0.529999971,1,119,,-70,0.133833081,15.80000019,0.575435758,18.70000076,101.1006317,3.662109375,0.5,0.800000012,90,,-35,0.146751866,18,0.528638184,19.39999962,101.0713272,43.9453125,,,,,0,0.107922807,19.5,0.552186966,19.10000038,101.173912,32.95898438,0.620000005,0.899999976,106,,15,20.1,0.170009517,101.2178798,0.577453605,18.9,40.28320313,,,,,30
2016-07-04 21:00:00,0.132085949,16.39999962,0.705513299,16.10000038,100.9980469,0,0.689999998,1.200000048,133,,-70,0.133833081,15.89999962,0.70737201,16.29999924,101.1006317,0,0.620000005,1,107,,-35,0.146751866,18,0.681418717,16.39999962,101.0713272,3.662109375,,,,,0,0.107922807,19.29999924,0.701026857,16.20000076,101.1445999,1.831054688,0.639999986,0.899999976,113,,15,19.8,0.170009517,101.2178798,0.710031924,16,1.831054688,,,,,30
2016-07-04 22:00:00,0.131648242,16.39999962,0.758024395,15.10000038,101.0127029,0,0.649999976,1,145,,-70,0.133833081,15.89999962,0.769686282,15.10000038,101.0859833,0,0.670000017,1.100000024,119,,-35,0.146751866,18,0.752193391,15.10000038,101.0713272,0,,,,,0,0.107922807,19,0.778755009,14.80000019,101.1152878,0,0.560000002,1,116,,15,19.3,0.169603833,101.2178798,0.777810585,14.7,0,,,,,30
2016-07-04 23:00:00,0.131648242,16.39999962,0.7757985,14.5,100.9980469,0,0.769999981,1.200000048,151,,-70,0.133396849,15.89999962,0.793030441,14.39999962,101.1006317,0,0.74000001,1.200000048,124,,-35,0.146751866,17.89999962,0.768629491,14.39999962,101.0859833,0,,,,,0,0.107922807,18.60000038,0.807585239,14,101.1152878,0,0.529999971,1.200000048,123,,15,18.9,0.169603833,101.2178798,0.789925343,14.1,0,,,,,30
2016-07-05 00:00:00,0.131648242,16.39999962,0.808395028,13.5,100.9833908,0,0.939999998,1.5,162,,-70,0.133396849,15.80000019,0.820188761,13.39999962,101.0859833,0,0.779999971,1.200000048,132,,-35,0.146751866,17.79999924,0.807169914,13.39999962,101.0566711,0,,,,,0,0.107465103,18.29999924,0.847413719,12.89999962,101.1006317,0,0.529999971,1.299999952,144,,15,18.5,0.168791424,101.2032242,0.828525415,13,0,,,,,30
2016-07-05 01:00:00,0.131648242,16.29999924,0.820511699,12.89999962,100.9540787,0,1.00999999,1.799999952,164,,-70,0.132960245,15.80000019,0.833962739,12.89999962,101.0420151,0,0.810000002,1.299999952,134,,-35,0.146751866,17.60000038,0.820511699,12.89999962,101.027359,0,,,,,0,0.107465103,18,0.860442758,12.30000019,101.0713272,0,0.50999999,1.399999976,154,,15,18.2,0.168791424,101.173913,0.842307005,12.5,0,,,,,30
2016-07-05 02:00:00,0.131210178,16.20000076,0.847856641,12.39999962,100.8954544,0,0.959999979,1.600000024,170,,-70,0.132960245,15.69999981,0.854806304,12.39999962,100.9833908,0,0.800000012,1.399999976,147,,-35,0.146326452,17.39999962,0.860442758,12.30000019,100.9687347,0,,,,,0,0.107465103,17.70000076,0.908409774,11.60000038,100.9980469,0,0.569999993,1.299999952,203,,15,17.9,0.1683847,101.1006351,0.882027186,11.8,0,,,,,30
2016-07-05 03:00:00,0.131210178,16.20000076,0.867438257,12.30000019,100.8368378,0,0.850000024,1.5,169,,-70,0.132960245,15.69999981,0.861755967,12.39999962,100.9394226,0,0.670000017,1.100000024,142,,-35,0.146326452,17.20000076,0.873162568,12.19999981,100.9101105,0,,,,,0,0.107465103,17.5,0.921812296,11.5,100.9540787,0,0.550000012,1.200000048,211,,15,17.6,0.1683847,101.0566683,0.895148519,11.7,0,,,,,30
2016-07-05 04:00:00,0.131210178,16.10000038,0.859079301,12.19999981,100.7782135,0,0.920000017,1.600000024,171,,-70,0.132960245,15.60000038,0.860442758,12.30000019,100.8807983,0,0.730000019,1.299999952,146,,-35,0.146326452,17.10000038,0.889256895,11.80000019,100.8514862,0,,,,,0,0.107007027,17.29999924,0.923856854,11.10000038,100.8807983,0,0.620000005,1.299999952,217,,15,17.3,0.1683847,100.9833903,0.904210352,11.3,0,,,,,30
2016-07-05 05:00:00,0.130771756,16,0.854806304,12.39999962,100.7195892,3.662109375,1.019999981,1.700000048,168,,-70,0.132523268,15.60000038,0.861755967,12.39999962,100.8221817,3.662109375,0.819999993,1.399999976,141,,-35,0.146326452,17,0.867438257,12.30000019,100.7928696,10.98632813,,,,,0,0.107007027,17.10000038,0.92306155,11.60000038,100.8368378,25.63476563,0.50999999,1.600000024,197,,15,17.1,0.1683847,100.9394235,0.884738521,12,31.12792969,,,,,30
2016-07-05 06:00:00,0.130771756,15.89999962,0.858314514,13.30000019,100.675621,10.98632813,0.920000017,1.600000024,167,,-70,0.132523268,15.5,0.865754783,13.39999962,100.7635574,10.98632813,0.75999999,1.299999952,141,,-35,0.145900697,16.79999924,0.85924536,13.39999962,100.7489014,31.12792969,,,,,0,0.107007027,16.89999962,0.873066664,13.5,100.7928696,67.74902344,0.409999996,1.200000048,170,,15,17,0.1683847,100.8954568,0.842626135,13.7,76.90429688,,,,,30
2016-07-05 07:00:00,0.130771756,15.80000019,0.852800131,14.19999981,100.6316528,21.97265625,0.660000026,1.299999952,170,,-70,0.132085949,15.39999962,0.859575987,14.30000019,100.7342453,25.63476563,0.550000012,1.100000024,141,,-35,0.145474568,16.79999924,0.859575987,14.30000019,100.7049332,40.28320313,,,,,0,0.107007027,16.79999924,0.844146609,14.80000019,100.7635574,139.1601563,0.300000012,1.899999976,188,,15,16.9,0.1683847,100.85149,0.794395294,15.3,162.9638672,,,,,30
2016-07-05 08:00:00,0.130332962,15.80000019,0.793768585,16.29999924,100.5730362,43.9453125,0.449999988,1.100000024,160,,-70,0.132085949,15.39999962,0.809967935,16.29999924,100.660965,45.77636719,0.419999987,1,119,,-35,0.145474568,16.70000076,0.78961575,16.70000076,100.6463089,98.87695313,,,,,0,0.107007027,16.79999924,0.735943079,17.60000038,100.7195892,203.2470703,0.409999996,3.400000095,204,,15,16.9,0.167977628,100.7928676,0.683691768,18,250.8544922,,,,,30
2016-07-05 09:00:00,0.130332962,15.69999981,0.72181344,17.79999924,100.5437241,62.25585938,0.569999993,1.399999976,155,,-70,0.131648242,15.30000019,0.731921732,17.89999962,100.6316528,56.76269531,0.5,1.200000048,114,,-35,0.145048082,16.70000076,0.718248188,18.20000076,100.6169968,109.8632813,,,,,0,0.107007027,17,0.683166623,19,100.6902771,270.9960938,0.409999996,3.700000048,205,,15,17.1,0.167977628,100.7489008,0.634217803,19.2,309.4482422,,,,,30
2016-07-05 10:00:00,0.12989381,15.69999981,0.642550051,20.20000076,100.4997559,135.4980469,0.49000001,1.700000048,221,,-70,0.131210178,15.30000019,0.630188406,20.29999924,100.6023483,76.90429688,0.560000002,2.400000095,228,,-35,0.144621253,16.70000076,0.613782167,20.39999962,100.5730362,69.58007813,,,,,0,0.106548563,17.20000076,0.559388459,21.79999924,100.675621,688.4765625,1.529999971,4.5,218,,15,17.5,0.167570209,100.704934,0.541719137,22.1,670.1660156,,,,,30
2016-07-05 11:00:00,0.129454285,15.69999981,0.561176419,22.29999924,100.4557877,219.7265625,0.730000019,2.200000048,261,,-70,0.131210178,15.39999962,0.546691835,22.39999962,100.529068,155.6396484,0.850000024,2,244,,-35,0.143766493,16.79999924,0.535610199,22.39999962,100.4997559,93.38378906,,,,,0,0.106089734,17.5,0.502307534,23.79999924,100.6463089,811.1572266,1.940000057,7.400000095,215,,15,18.1,0.167977628,100.6463117,0.489597575,24,780.0292969,,,,,30
2016-07-05 12:00:00,0.129014403,15.80000019,0.545658588,23.29999924,100.4118195,126.3427734,0.620000005,1.899999976,233,,-70,0.131210178,15.39999962,0.532201171,23.5,100.4997559,140.9912109,0.720000029,2.400000095,230,,-35,0.143338576,16.89999962,0.528745294,23.5,100.4704437,159.3017578,,,,,0,0.106089734,18.10000038,0.497331291,24.29999924,100.5876923,677.4902344,1.870000005,6.400000095,219,,15,19.1,0.167977628,100.6023449,0.4910867,24.4,675.6591797,,,,,30
2016-07-05 13:00:00,0.128574133,15.89999962,0.587436914,22.5,100.3532028,53.10058594,0.439999998,1.200000048,220,,-70,0.130771756,15.60000038,0.569628298,22.79999924,100.4411316,54.93164063,0.50999999,1.600000024,218,,-35,0.142481655,17.10000038,0.555645585,23,100.4118195,135.4980469,,,,,0,0.106089734,18.70000076,0.53866297,23.29999924,100.529068,256.3476563,1.549999952,5.099999905,217,,15,20.1,0.1683847,100.5437225,0.528745296,23.5,269.1650391,,,,,30
2016-07-05 14:00:00,0.128574133,16.10000038,0.598477066,22.60000038,100.2799225,64.08691406,0.460000008,1.600000024,213,,-70,0.130771756,15.69999981,0.580520928,22.89999962,100.3678589,64.08691406,0.49000001,1.700000048,201,,-35,0.142052665,17.29999924,0.563147664,23.29999924,100.3238907,192.2607422,,,,,0,0.106089734,19.10000038,0.546178401,23.60000038,100.4411316,274.6582031,1.480000019,5.400000095,214,,15,20.4,0.1683847,100.4704446,0.535873148,23.6,287.4755859,,,,,30
2016-07-05 15:00:00,0.12813352,16.20000076,0.587324321,22.39999962,100.2506104,53.10058594,0.660000026,2,242,,-70,0.130332962,15.80000019,0.569283068,22.60000038,100.3238907,62.25585938,0.769999981,2,237,,-35,0.141623303,17.39999962,0.55543673,22.89999962,100.2945786,179.4433594,,,,,0,0.105630517,19.29999924,0.548964977,23.20000076,100.4118195,256.3476563,1.860000014,5.5,213,,15,20.5,0.1683847,100.4411334,0.545445974,23.2,269.1650391,,,,,30
2016-07-05 16:00:00,0.12813352,16.29999924,0.704475641,20.89999962,100.1919861,40.28320313,0.629999995,1.899999976,286,0.45,-70,0.130332962,15.89999962,0.683662117,21.20000076,100.2799225,40.28320313,0.74000001,3,265,0.4,-35,0.140763521,17.60000038,0.659354448,21.60000038,100.2506104,172.1191406,,,,0.4,0,0.105170928,19.5,0.666899502,21.70000076,100.3385468,208.7402344,1.230000019,5.900000095,215,2.4,15,20.5,0.1683847,100.3971666,0.662836975,21.8,221.5576172,,,,2,30
2016-07-05 17:00:00,0.127692536,16.5,0.879929304,18.89999962,100.1040573,45.77636719,0.419999987,1,107,0.05,-70,0.130332962,16,0.886105716,19.20000076,100.2066422,29.296875,0.449999988,0.899999976,99,,-35,0.140763521,17.70000076,0.800092936,20.60000038,100.17733,230.7128906,,,,,0,0.105170928,19.5,0.793547213,20.89999962,100.2359543,227.0507813,0.689999998,2.900000095,135,,15,20.5,0.1683847,100.3238886,0.772588122,21,241.6992188,,,,,30
2016-07-05 18:00:00,0.127692536,16.60000038,0.827631772,19.20000076,100.0600891,23.80371094,0.479999989,2,160,,-70,0.130332962,16,0.844843388,19.29999924,100.162674,27.46582031,0.460000008,1.399999976,141,,-35,0.140333071,17.79999924,0.768829823,20.29999924,100.1480179,126.3427734,,,,,0,0.105170928,19.60000038,0.759395301,20.5,100.2066422,151.9775391,1.090000033,5.099999905,195,,15,20.5,0.1683847,100.2799218,0.742354281,20.6,162.9638672,,,,,30
2016-07-05 19:00:00,0.127692536,16.60000038,0.867328703,18.10000038,100.0600891,14.6484375,0.449999988,1.799999952,153,0.25,-70,0.130332962,16.10000038,0.875538528,18.29999924,100.1480179,23.80371094,0.50999999,2.900000095,135,0.25,-35,0.140333071,17.89999962,0.838017762,19,100.1333694,120.8496094,,,,0.25,0,0.105630517,19.5,0.837332666,19.10000038,100.17733,126.3427734,0.829999983,6,189,1.8,15,20.4,0.1683847,100.2652662,0.818635746,19.2,148.3154297,,,,,30
2016-07-05 20:00:00,0.127692536,16.70000076,0.93837297,17.20000076,100.0600891,1.831054688,0.330000013,0.800000012,95,,-70,0.130332962,16.10000038,0.966867745,17.39999962,100.1187134,7.32421875,0.430000007,0.800000012,91,,-35,0.140333071,18,0.908847094,18.29999924,100.1187134,56.76269531,,,,,0,0.106089734,19.39999962,0.893707752,18.39999962,100.162674,51.26953125,0.49000001,3.099999905,115,,15,20.2,0.167977628,100.2652662,0.863901648,18.6,64.08691406,,,,,30
2016-07-05 21:00:00,0.127692536,16.70000076,0.910156608,16.79999924,100.0747452,0,0.680000007,1.899999976,306,,-70,0.130332962,16.10000038,0.929673612,17,100.1480179,0,0.970000029,2.5,286,,-35,0.140333071,18,0.90327388,17.10000038,100.1480179,1.831054688,,,,,0,0.105630517,19.29999924,0.909014225,17,100.2066422,1.831054688,0.74000001,4.300000191,60,,15,19.9,0.167570209,100.2799218,0.898684513,17,1.831054688,,,,,30
2016-07-05 22:00:00,0.127251178,16.70000076,0.785493135,17.29999924,100.0894012,0,1.269999981,2.099999905,295,,-70,0.130332962,16.10000038,0.765906394,17.70000076,100.17733,0,1.889999986,3,282,,-35,0.140333071,18,0.760806024,17.60000038,100.162674,0,,,,,0,0.105630517,19.10000038,0.780425429,17.29999924,100.2359543,0,0.959999979,3.299999952,276,,15,19.6,0.167570209,100.2945774,0.780277519,17.2,0,,,,,30
2016-07-05 23:00:00,0.126809448,16.70000076,0.805050671,16.5,100.0600891,0,0.589999974,1.600000024,278,,-70,0.130332962,16.10000038,0.79507935,16.79999924,100.1480179,0,0.709999979,2.099999905,281,,-35,0.140333071,17.89999962,0.779087543,16.70000076,100.1333694,0,,,,,0,0.105170928,18.79999924,0.799459755,16.39999962,100.17733,0,0.469999999,2.400000095,226,,15,19.3,0.167162443,100.2799218,0.804568144,16.3,0,,,,,30
2016-07-06 00:00:00,0.12636736,16.70000076,0.831122637,16,100.0600891,0,0.860000014,3,267,,-70,0.130332962,16.10000038,0.826016128,16.20000076,100.1480179,0,1.090000033,4.5,261,,-35,0.140333071,17.79999924,0.809967935,16.29999924,100.1333694,0,,,,,0,0.105170928,18.60000038,0.82583338,16.10000038,100.17733,0,1.080000043,5.699999809,226,,15,19,0.167570209,100.2652662,0.820364267,16.1,0,,,,,30
2016-07-06 01:00:00,0.126809448,16.60000038,0.709886849,16.60000038,100.0747452,0,2.569999933,5.400000095,292,,-70,0.130332962,16,0.696492076,16.89999962,100.17733,0,3.720000029,7.699999809,278,,-35,0.140333071,17.70000076,0.690463662,16.79999924,100.162674,0,,,,,0,0.104710966,18.39999962,0.700125933,16.70000076,100.2212982,0,2.450000048,8.5,262,,15,18.7,0.167570209,100.2945774,0.700125956,16.7,0,,,,,30
2016-07-06 02:00:00,0.126809448,16.60000038,0.720122457,15.89999962,100.0747452,0,2.109999895,4,289,,-70,0.130332962,16,0.710982382,16.10000038,100.17733,0,2.819999933,5.800000191,275,,-35,0.140333071,17.60000038,0.700044155,16.10000038,100.162674,0,,,,,0,0.104250617,18.20000076,0.710031927,16,100.2212982,0,2.180000067,10.5,255,,15,18.4,0.167570209,100.2945774,0.710031924,16,0,,,,,30
2016-07-06 03:00:00,0.126809448,16.5,0.742586911,15.30000019,100.0894012,0,2.400000095,4.599999905,290,,-70,0.130332962,16,0.74355495,15.39999962,100.17733,0,3.279999971,7.5,276,,-35,0.140333071,17.5,0.732115626,15.39999962,100.17733,0,,,,,0,0.104250617,17.89999962,0.737835288,15.39999962,100.2212982,0,2.420000076,8,263,,15,18.1,0.167162443,100.309233,0.737835306,15.4,0,,,,,30
2016-07-06 04:00:00,0.12636736,16.39999962,0.826366305,14,100.1187134,0,2.180000067,4.300000191,288,,-70,0.130332962,15.89999962,0.827244639,14.10000038,100.1919861,0,3.059999943,6.199999809,275,,-35,0.140333071,17.29999924,0.821024776,14.10000038,100.1919861,0,,,,,0,0.104250617,17.70000076,0.827244639,14.10000038,100.2359543,0,2.24000001,10.10000038,261,,15,17.9,0.167162443,100.3531998,0.832626668,14,0,,,,,30
2016-07-06 05:00:00,0.12636736,16.29999924,0.870528877,13.19999981,100.1480179,0,2.119999886,3.700000048,287,,-70,0.130332962,15.89999962,0.877970517,13.30000019,100.2506104,0,2.869999886,5.300000191,273,,-35,0.140333071,17.20000076,0.870528877,13.19999981,100.2359543,3.662109375,,,,,0,0.104250617,17.60000038,0.877123773,13.19999981,100.2799225,7.32421875,1.980000019,7.699999809,258,,15,17.7,0.167162443,100.382511,0.87712379,13.2,7.32421875,,,,,30
2016-07-06 06:00:00,0.12636736,16.29999924,0.797941387,13.69999981,100.162674,9.155273438,2.309999943,4.400000095,292,,-70,0.130771756,15.80000019,0.792771459,13.80000019,100.2652664,9.155273438,3.380000114,7,277,,-35,0.140333071,17.10000038,0.786429286,13.80000019,100.2652664,32.95898438,,,,,0,0.104250617,17.39999962,0.787639081,13.89999962,100.3092346,54.93164063,2.450000048,6.900000095,267,,15,17.5,0.167162443,100.4118222,0.781337952,13.9,58.59375,,,,,30
2016-07-06 07:00:00,0.1259249,16.20000076,0.775036812,13.89999962,100.2066422,14.6484375,2.329999924,4.599999905,290,,-70,0.130771756,15.80000019,0.776283503,14,100.3092346,14.6484375,3.349999905,6.800000191,276,,-35,0.140333071,17,0.770023167,14,100.3092346,47.60742188,,,,,0,0.104250617,17.20000076,0.771265686,14.10000038,100.3532028,78.73535156,2.349999905,7.199999809,261,,15,17.3,0.167162443,100.455789,0.765045804,14.1,84.22851563,,,,,30
2016-07-06 08:00:00,0.1259249,16.10000038,0.792771459,13.80000019,100.2506104,34.79003906,2.789999962,5.699999809,291,0.05,-70,0.130771756,15.69999981,0.793940187,13.89999962,100.3532028,36.62109375,3.960000038,9.699999809,275,0.05,-35,0.140333071,16.79999924,0.782543838,14,100.3532028,86.05957031,,,,0.1,0,0.104250617,17.10000038,0.778643608,14.19999981,100.3971634,172.1191406,2.619999886,10.19999981,266,0.4,15,17.2,0.167162443,100.4997557,0.773618404,14.3,201.4160156,,,,0.4,30
2016-07-06 09:00:00,0.125482067,16,0.794151008,13.39999962,100.2945786,86.05957031,2.970000029,6.400000095,293,,-70,0.130332962,15.60000038,0.783873558,13.60000038,100.3971634,60.42480469,4.440000057,9.800000191,278,,-35,0.139902279,16.79999924,0.772407293,13.69999981,100.3825073,73.2421875,,,,0.1,0,0.104250617,17.10000038,0.765045822,14.10000038,100.4411316,265.5029297,2.980000019,10,271,,15,17.2,0.167162443,100.5290669,0.750328814,14.4,439.453125,,,,,30
2016-07-06 10:00:00,0.125038877,15.89999962,0.724499762,14.30000019,100.3238907,87.890625,2.950000048,5.900000095,293,,-70,0.130332962,15.60000038,0.713727415,14.39999962,100.4264755,47.60742188,4.340000153,8.899999619,279,,-35,0.139471114,16.70000076,0.70912832,14.5,100.4264755,97.04589844,,,,,0,0.103328802,17,0.692494333,15,100.4997559,322.265625,2.690000057,8.199999809,273,,15,17.3,0.167570209,100.5730337,0.692494319,15,320.4345703,,,,,30
2016-07-06 11:00:00,0.125038877,15.89999962,0.716606259,14.60000038,100.3678589,84.22851563,2.819999933,5.800000191,295,,-70,0.130332962,15.60000038,0.70741868,14.80000019,100.4557877,97.04589844,4.320000172,7.5,279,,-35,0.139039591,16.60000038,0.692494333,15,100.4411316,157.4707031,,,,0.05,0,0.103328802,17,0.686358452,15.39999962,100.529068,459.5947266,2.710000038,9.800000191,274,,15,17.4,0.167162443,100.6023449,0.686358424,15.4,454.1015625,,,,,30
2016-07-06 12:00:00,0.124595322,15.89999962,0.63038075,16.20000076,100.3825073,89.72167969,2.99000001,6.5,293,,-70,0.130332962,15.5,0.620975435,16.29999924,100.4704437,84.22851563,4.420000076,8.899999619,279,,-35,0.139039591,16.60000038,0.603933573,16.60000038,100.4557877,166.6259766,,,,,0,0.103328802,17.10000038,0.597735763,16.89999962,100.5583801,421.1425781,2.980000019,9.199999809,271,,15,17.6,0.167570209,100.6023449,0.597735737,16.9,422.9736328,,,,0.2,30
2016-07-06 13:00:00,0.124151386,15.80000019,0.673287332,15.69999981,100.3971634,131.8359375,2.75,6.599999905,298,,-70,0.12989381,15.5,0.659189045,15.89999962,100.4997559,111.6943359,4.190000057,9.699999809,284,,-35,0.138607711,16.60000038,0.650822341,16.10000038,100.4850998,344.2382813,,,,0.1,0,0.103328802,17.29999924,0.649225712,16.39999962,100.5730362,432.1289063,2.49000001,8.5,292,0.4,15,17.9,0.167570209,100.6316561,0.653374131,16.3,437.6220703,,,,0.2,30
2016-07-06 14:00:00,0.123707086,15.80000019,0.739727616,15.60000038,100.4264755,106.2011719,2.589999914,5.900000095,298,0.05,-70,0.12989381,15.5,0.724741936,15.80000019,100.5144119,78.73535156,4.039999962,8.600000381,282,0.05,-35,0.138175473,16.60000038,0.710982382,16.10000038,100.4997559,329.5898438,,,,0.15,0,0.103328802,17.5,0.718171537,16.29999924,100.5730362,373.5351563,2.470000029,10.39999962,282,0.6,15,18.2,0.167570209,100.6463117,0.718171565,16.3,377.1972656,,,,0.4,30
2016-07-06 15:00:00,0.123707086,15.80000019,0.689597726,16.70000076,100.4557877,117.1875,2.869999886,5.5,299,,-70,0.12989381,15.5,0.671430945,17,100.5437241,128.1738281,4.369999886,8.399999619,284,,-35,0.137742862,16.60000038,0.649614275,17.39999962,100.5437241,540.1611328,,,,0.05,0,0.103328802,17.79999924,0.647314429,17.70000076,100.6169968,558.4716797,2.880000114,8.5,288,,15,18.4,0.167977628,100.6756229,0.647314457,17.7,569.4580078,,,,0.2,30
2016-07-06 16:00:00,0.12326242,15.89999962,0.575435758,18.70000076,100.4411316,84.22851563,3.210000038,6.800000191,298,,-70,0.12989381,15.5,0.560196638,19,100.529068,142.8222656,4.78000021,7.699999809,282,,-35,0.137309894,16.79999924,0.535268843,19.60000038,100.5144119,670.1660156,,,,0.05,0,0.103328802,18.20000076,0.534010947,19.89999962,100.6169968,620.7275391,3.079999924,11.10000038,283,,15,18.6,0.1683847,100.6609673,0.529704388,19.9,642.7001953,,,,,30
2016-07-06 17:00:00,0.122817382,15.89999962,0.522458017,18.89999962,100.4557877,80.56640625,3.319999933,5.599999905,296,,-70,0.12989381,15.5,0.50827384,19.20000076,100.529068,93.38378906,4.800000191,9,281,,-35,0.13644287,16.89999962,0.491394311,19.60000038,100.529068,382.6904297,,,,0.05,0,0.10286732,18.39999962,0.486638993,19.89999962,100.6316528,377.1972656,2.960000038,11.89999962,279,,15,18.8,0.1683847,100.6756229,0.489665366,19.8,402.8320313,,,,,30
2016-07-06 18:00:00,0.122371979,15.89999962,0.502673864,18.79999924,100.4997559,38.45214844,3.289999962,5.599999905,299,,-70,0.12989381,15.5,0.49643442,19,100.5876923,42.11425781,5.019999981,8.600000381,283,,-35,0.135574386,17,0.476798147,19.5,100.5730362,320.4345703,,,,,0,0.10286732,18.39999962,0.473844528,19.60000038,100.675621,285.6445313,3.069999933,8.5,283,,15,18.8,0.167977628,100.704934,0.473844526,19.6,316.7724609,,,,,30
2016-07-06 19:00:00,0.121926203,16,0.520397186,18.10000038,100.5583801,16.47949219,3.039999962,6.400000095,302,,-70,0.129454285,15.5,0.509144723,18.29999924,100.6316528,29.296875,4.650000095,8.199999809,285,,-35,0.135574386,17.10000038,0.498101622,18.5,100.6316528,128.1738281,,,,,0,0.10286732,18.29999924,0.499662042,18.60000038,100.7195892,122.6806641,2.710000038,8.899999619,297,,15,18.6,0.167977628,100.7635564,0.494992296,18.6,140.9912109,,,,,30
2016-07-06 20:00:00,0.121480055,16,0.538884997,17.10000038,100.6169968,1.831054688,2.410000086,4.5,309,,-70,0.129454285,15.5,0.532108247,17.29999924,100.6902771,5.493164063,3.970000029,8.5,292,,-35,0.135574386,17.20000076,0.523720026,17.39999962,100.675621,42.11425781,,,,,0,0.102405466,18.10000038,0.523720026,17.39999962,100.7782135,38.45214844,2.319999933,7.599999905,316,,15,18.3,0.167570209,100.8221788,0.523720016,17.4,45.77636719,,,,,30
2016-07-06 21:00:00,0.121033542,15.89999962,0.586906195,16.20000076,100.6902771,0,2.289999962,4.400000095,302,,-70,0.129454285,15.5,0.583176911,16.29999924,100.7635574,0,3.75999999,6.699999809,285,,-35,0.135574386,17.10000038,0.577777147,16.29999924,100.7635574,1.831054688,,,,,0,0.102405466,17.89999962,0.58147186,16.20000076,100.8514862,1.831054688,2.079999924,9,295,,15,18,0.167162443,100.924768,0.581471886,16.2,1.831054688,,,,,30
2016-07-06 22:00:00,0.121033542,15.89999962,0.623912394,15.10000038,100.7489014,0,2.180000067,3.900000095,297,,-70,0.129454285,15.5,0.619913936,15.19999981,100.8514862,0,3.450000048,5.599999905,282,,-35,0.135139614,17,0.618081391,15.10000038,100.8368378,0,,,,,0,0.102405466,17.60000038,0.627939761,15,100.9101105,0,1.75999999,6.800000191,285,,15,17.7,0.166754329,100.9687347,0.627939764,15,0,,,,,30
2016-07-06 23:00:00,0.120586656,15.89999962,0.664925516,14.39999962,100.8075256,0,2.170000076,4.199999809,301,,-70,0.129454285,15.5,0.660640955,14.5,100.8954544,0,3.49000001,6.099999905,284,,-35,0.135139614,16.89999962,0.654579997,14.5,100.8807983,0,,,,,0,0.102405466,17.39999962,0.658825278,14.39999962,100.9394226,0,1.820000052,5.400000095,292,,15,17.4,0.166754329,101.0127015,0.663101489,14.3,0,,,,,30
2016-07-07 00:00:00,0.120586656,15.80000019,0.704920471,13.5,100.8075256,0,1.75,3.299999952,300,,-70,0.129454285,15.39999962,0.695804894,13.69999981,100.9101105,0,2.789999962,5.300000191,283,,-35,0.135139614,16.79999924,0.698453307,13.5,100.8954544,0,,,,,0,0.101943232,17.10000038,0.703018963,13.39999962,100.9394226,0,1.409999967,4.699999809,292,,15,17.1,0.166754329,101.0273571,0.703018944,13.4,0,,,,,30
2016-07-07 01:00:00,0.120139405,15.69999981,0.730194032,13.10000038,100.8368378,0,1.840000033,3,298,,-70,0.129014403,15.39999962,0.725440741,13.19999981,100.9247665,0,3.019999981,4.699999809,281,,-35,0.135139614,16.60000038,0.723555863,13.10000038,100.9101105,0,,,,,0,0.101943232,16.89999962,0.739805639,12.89999962,100.9540787,0,1.50999999,4.300000191,284,,15,16.8,0.166754329,101.0566683,0.733080135,12.9,0,,,,,30
2016-07-07 02:00:00,0.120139405,15.60000038,0.759457111,12.5,100.8221817,0,1.5,2.700000048,301,,-70,0.129014403,15.30000019,0.756373405,12.69999981,100.9247665,0,2.569999933,4.099999905,284,,-35,0.135139614,16.5,0.759457111,12.5,100.9101105,0,,,,,0,0.101943232,16.70000076,0.764460921,12.39999962,100.9540787,0,1.230000019,5.199999809,294,,15,16.5,0.166754329,101.0566683,0.769501672,12.3,0,,,,,30
2016-07-07 03:00:00,0.120139405,15.60000038,0.793871522,12.10000038,100.8514862,0,1.470000029,2.700000048,304,,-70,0.128574133,15.19999981,0.795704603,12.19999981,100.9540787,0,2.619999886,4.599999905,285,,-35,0.135139614,16.39999962,0.793871522,12.10000038,100.9394226,0,,,,,0,0.101943232,16.39999962,0.804404676,11.89999962,100.9833908,0,1.330000043,4.300000191,300,,15,16.3,0.166754329,101.0713239,0.804404675,11.9,0,,,,,30
2016-07-07 04:00:00,0.119691774,15.5,0.842522204,11.19999981,100.8954544,0,1.419999957,2.200000048,296,,-70,0.128574133,15.19999981,0.838852525,11.39999962,100.9833908,0,2.269999981,3.200000048,279,,-35,0.135139614,16.29999924,0.842522204,11.19999981,100.9833908,0,,,,,0,0.101943232,16.20000076,0.853781343,11,101.0127029,0,0.939999998,3.099999905,284,,15,16.1,0.166754329,101.1299463,0.853781352,11,0,,,,,30
2016-07-07 05:00:00,0.119691774,15.39999962,0.878763974,10.69999981,100.9394226,0,1.120000005,2,294,,-70,0.128574133,15.10000038,0.888384461,10.80000019,101.0420151,0,1.730000019,3.099999905,278,,-35,0.135139614,16.10000038,0.878763974,10.69999981,101.027359,3.662109375,,,,,0,0.101943232,16,0.884637237,10.60000038,101.0566711,9.155273438,0.819999993,3.200000048,280,,15,15.9,0.166345867,101.1885686,0.88463722,10.6,10.98632813,,,,,30
2016-07-07 06:00:00,0.119691774,15.30000019,0.878421247,11.10000038,100.9833908,5.493164063,1.129999995,2.099999905,294,,-70,0.128574133,15.10000038,0.88179189,11.30000019,101.0859833,3.662109375,1.840000033,3.299999952,279,,-35,0.135139614,16,0.880134821,11.19999981,101.0713272,10.98632813,,,,,0,0.101943232,15.89999962,0.880134821,11.19999981,101.1006317,20.14160156,1.070000052,4.099999905,281,,15,15.7,0.166345867,101.2178798,0.880134801,11.2,25.63476563,,,,,30
2016-07-07 07:00:00,0.119243778,15.19999981,0.827007711,12.39999962,101.0420151,18.31054688,1.570000052,3,299,,-70,0.12813352,15,0.823080003,12.60000038,101.1299438,18.31054688,2.599999905,5.099999905,283,,-35,0.134704471,15.89999962,0.8108868,12.69999981,101.1299438,18.31054688,,,,,0,0.101480618,15.69999981,0.801798761,13,101.173912,159.3017578,1.590000033,6.300000191,293,,15,15.5,0.166345867,101.2618466,0.78113216,13.4,164.7949219,,,,,30
2016-07-07 08:00:00,0.119243778,15.10000038,0.749832392,13.89999962,101.1006317,49.43847656,1.799999952,3.599999905,294,,-70,0.12813352,15,0.740166247,14.10000038,101.2032242,47.60742188,2.809999943,5.300000191,278,,-35,0.134704471,15.80000019,0.729205906,14.19999981,101.1885681,27.46582031,,,,,0,0.101480618,15.60000038,0.70741868,14.80000019,101.2471924,93.38378906,1.879999995,5.800000191,277,,15,15.4,0.165937056,101.3351246,0.67761308,15.6,426.6357422,,,,,30
2016-07-07 09:00:00,0.118795417,15.10000038,0.650483131,15.30000019,101.159256,71.41113281,1.929999948,3.900000095,307,,-70,0.12813352,14.89999962,0.646320879,15.39999962,101.2618484,56.76269531,3.059999943,6.199999809,290,,-35,0.134268954,15.80000019,0.628401518,15.69999981,101.2471924,75.07324219,,,,,0,0.101480618,15.60000038,0.606301665,16.39999962,101.3351212,228.8818359,2.00999999,5.900000095,312,,15,15.6,0.165527898,101.3790914,0.587340333,16.9,481.5673828,,,,,30
2016-07-07 10:00:00,0.118346676,15,0.592340529,16.20000076,101.1885681,137.3291016,2.059999943,3.599999905,300,,-70,0.127692536,14.89999962,0.583176911,16.29999924,101.2765045,67.74902344,3.309999943,6.300000191,284,,-35,0.134268954,15.69999981,0.572147608,16.60000038,101.2471924,86.05957031,,,,,0,0.101017632,15.69999981,0.542012095,17.60000038,101.3497772,620.7275391,2.049999952,5.599999905,292,,15,15.9,0.165527898,101.3937469,0.538605159,17.7,596.9238281,,,,,30
2016-07-07 11:00:00,0.118346676,15,0.555884004,17.20000076,101.173912,151.9775391,1.730000019,3.799999952,298,,-70,0.127692536,14.89999962,0.542243659,17.29999924,101.2765045,133.6669922,2.710000038,5.699999809,284,,-35,0.133396849,15.69999981,0.527094364,17.60000038,101.2471924,117.1875,,,,,0,0.100554258,15.89999962,0.501185954,18.70000076,101.3497772,651.8554688,2.089999914,6.300000191,289,,15,16.5,0.165937056,101.3937469,0.498062171,18.8,629.8828125,,,,,30
2016-07-07 12:00:00,0.117448084,15.10000038,0.51235038,18.20000076,101.159256,203.2470703,2,3.799999952,302,,-70,0.127251178,14.89999962,0.499627978,18.29999924,101.2325363,128.1738281,2.99000001,5.599999905,287,,-35,0.132523268,15.80000019,0.487264127,18.70000076,101.2178802,181.2744141,,,,,0,0.100090511,16.29999924,0.463553756,19.5,101.3204727,708.6181641,2.069999933,7.900000095,293,,15,17.2,0.165937056,101.3644358,0.460682178,19.6,697.6318359,,,,,30
2016-07-07 13:00:00,0.117448084,15.10000038,0.493450493,18.79999924,101.1445999,128.1738281,1.710000038,3.400000095,295,,-70,0.127251178,15,0.485794306,18.89999962,101.2178802,159.3017578,2.619999886,5.400000095,282,,-35,0.131648242,15.89999962,0.466445446,19.39999962,101.2032242,556.640625,,,,,0,0.100090511,16.89999962,0.450874358,20.10000038,101.3204727,671.9970703,1.980000019,5.800000191,274,,15,18,0.166345867,101.3497802,0.448094118,20.2,673.828125,,,,,30
2016-07-07 14:00:00,0.116998233,15.19999981,0.473844528,19.60000038,101.1445999,203.2470703,1.75999999,3.400000095,290,,-70,0.126809448,15,0.466551155,19.70000076,101.2178802,113.5253906,2.529999971,5.900000095,278,,-35,0.12989381,16,0.446766615,20.39999962,101.2032242,677.4902344,,,,,0,0.100090511,17.60000038,0.431919366,21.10000038,101.3058167,721.4355469,1.929999948,5.699999809,268,,15,18.8,0.166345867,101.3351246,0.42792011,21.1,734.2529297,,,,,30
2016-07-07 15:00:00,0.116097413,15.30000019,0.446332157,19.79999924,101.1006317,111.6943359,1.570000052,3.400000095,293,,-70,0.126809448,15.10000038,0.432274282,20,101.173912,131.8359375,2.390000105,5,279,,-35,0.128574133,16.29999924,0.413984478,20.70000076,101.159256,611.5722656,,,,,0,0.100090511,18.5,0.402948409,21.29999924,101.2618484,615.234375,1.860000014,6.099999905,269,,15,19.6,0.166754329,101.2911578,0.400486293,21.4,626.2207031,,,,,30
2016-07-07 16:00:00,0.115646444,15.39999962,0.419119805,20.5,101.0859833,86.05957031,1.429999948,3.200000048,293,,-70,0.12636736,15.19999981,0.411443353,20.79999924,101.159256,120.8496094,2.170000076,5.400000095,279,,-35,0.127251178,16.60000038,0.386974186,21.79999924,101.1299438,648.1933594,,,,,0,0.099626377,19.29999924,0.377648205,22.20000076,101.2618484,607.9101563,1.720000029,5.099999905,269,,15,20.1,0.166754329,101.2765022,0.377648219,22.2,642.7001953,,,,,30
2016-07-07 17:00:00,0.115646444,15.60000038,0.427419186,20.5,101.0713272,98.87695313,1.24000001,2.700000048,303,,-70,0.12636736,15.19999981,0.415517032,20.79999924,101.1445999,78.73535156,2.059999943,4.800000191,287,,-35,0.1259249,16.89999962,0.393200874,21.70000076,101.1152878,494.3847656,,,,,0,0.099161871,19.60000038,0.385126412,22.20000076,101.2471924,446.7773438,1.360000014,4.800000191,294,,15,20.3,0.166345867,101.2618466,0.38138731,22.2,481.5673828,,,,,30
2016-07-07 18:00:00,0.115195103,15.69999981,0.435718596,20.5,101.0566711,38.45214844,1.330000043,3.099999905,297,,-70,0.12636736,15.30000019,0.423664451,20.79999924,101.1299438,49.43847656,2.109999895,4.300000191,280,,-35,0.124595322,17.10000038,0.397055775,21.70000076,101.1006317,395.5078125,,,,,0,0.098696984,19.70000076,0.39124161,22.10000038,101.2325363,342.4072266,1.49000001,6.300000191,274,,15,20.3,0.165937056,101.247191,0.391241599,22.1,380.859375,,,,,30
2016-07-07 19:00:00,0.114743389,15.80000019,0.445333123,20.29999924,101.0566711,14.6484375,1.139999986,2.5,292,,-70,0.1259249,15.39999962,0.433039993,20.60000038,101.1299438,36.62109375,1.860000014,4.099999905,277,,-35,0.124595322,17.29999924,0.405845821,21.5,101.1152878,228.8818359,,,,,0,0.098696984,19.60000038,0.407248318,21.60000038,101.2178802,181.2744141,1.350000024,4.300000191,266,,15,20.1,0.165527898,101.247191,0.405845815,21.5,217.8955078,,,,,30
2016-07-07 20:00:00,0.114291303,15.80000019,0.537424445,19,101.0566711,1.831054688,0.479999989,1.600000024,315,,-70,0.1259249,15.39999962,0.493099481,19.39999962,101.1299438,7.32421875,0.930000007,2.299999952,291,,-35,0.124151386,17.5,0.460776031,20.20000076,101.1006317,67.74902344,,,,,0,0.09823171,19.5,0.466339409,20.29999924,101.2032242,47.60742188,0.49000001,2.200000048,312,,15,19.8,0.165527898,101.247191,0.467888492,20.1,60.42480469,,,,,30
2016-07-07 21:00:00,0.114291303,15.89999962,0.660494804,16,101.0566711,0,0.540000021,0.800000012,116,,-70,0.1259249,15.39999962,0.661760509,16.10000038,101.1445999,0,0.550000012,0.899999976,91,,-35,0.124595322,17.5,0.645353198,16.10000038,101.1299438,0,,,,,0,0.09823171,19.20000076,0.67026782,15.89999962,101.1885681,0,0.639999986,1.399999976,106,,15,19.4,0.165118391,101.2618466,0.694553407,15.6,0,,,,,30
2016-07-07 22:00:00,0.114291303,15.89999962,0.741579235,15.19999981,101.0566711,0,0.479999989,0.800000012,147,,-70,0.125482067,15.39999962,0.747372866,15.19999981,101.1445999,0,0.449999988,0.800000012,121,,-35,0.124595322,17.5,0.741579235,15.19999981,101.1299438,0,,,,,0,0.09823171,18.89999962,0.768786073,15,101.159256,0,0.460000008,1,120,,15,19,0.165118391,101.2618466,0.79576006,14.7,0,,,,,30
2016-07-07 23:00:00,0.113838844,15.89999962,0.731197417,14.80000019,101.0420151,0,0.479999989,0.899999976,149,,-70,0.125482067,15.39999962,0.737142146,14.80000019,101.1299438,0,0.529999971,0.899999976,118,,-35,0.124595322,17.39999962,0.725252748,14.80000019,101.1152878,0,,,,,0,0.09823171,18.5,0.768629491,14.39999962,101.159256,0,0.449999988,0.899999976,113,,15,18.7,0.165118391,101.247191,0.813845615,14,0,,,,,30
2016-07-08 00:00:00,0.113838844,15.80000019,0.770803392,14.60000038,101.027359,0,0.579999983,1,142,,-70,0.125482067,15.39999962,0.7718274,14.69999981,101.1152878,0,0.560000002,0.899999976,119,,-35,0.124595322,17.20000076,0.753877938,14.69999981,101.1006317,0,,,,,0,0.09823171,18.29999924,0.793030441,14.39999962,101.1445999,0,0.419999987,0.899999976,118,,15,18.4,0.165118391,101.247191,0.798177718,14.3,0,,,,,30
2016-07-08 01:00:00,0.113838844,15.80000019,0.765045822,14.10000038,100.9980469,0,0.779999971,1.200000048,128,,-70,0.125038877,15.39999962,0.777485549,14.10000038,101.0859833,0,0.699999988,1.200000048,107,,-35,0.124595322,17.10000038,0.770023167,14,101.0859833,0,,,,,0,0.097766064,18,0.808395028,13.5,101.1006317,0,0.519999981,1.100000024,111,,15,18.1,0.164708535,101.2032242,0.824364464,13.2,0,,,,,30
2016-07-08 02:00:00,0.113386005,15.80000019,0.821843743,13,100.9687347,0,0.769999981,1.399999976,152,,-70,0.125038877,15.30000019,0.823127806,13.10000038,101.0566711,0,0.730000019,1.200000048,122,,-35,0.125038877,17,0.809851527,13.10000038,101.0420151,0,,,,,0,0.097766064,17.79999924,0.839440048,12.80000019,101.0859833,0,0.519999981,1.100000024,127,,15,17.8,0.16429833,101.173913,0.844957693,12.7,0,,,,,30
2016-07-08 03:00:00,0.113386005,15.69999981,0.852979422,12.80000019,100.9394226,0,0.680000007,1.399999976,165,,-70,0.124595322,15.30000019,0.854139268,12.89999962,101.027359,0,0.529999971,1.299999952,136,,-35,0.125038877,16.89999962,0.859749079,12.80000019,101.0127029,0,,,,,0,0.097766064,17.5,0.87795198,12.60000038,101.0566711,0,0.300000012,1.299999952,182,,15,17.5,0.163887775,101.1592574,0.88373194,12.5,0,,,,,30
2016-07-08 04:00:00,0.113386005,15.60000038,0.854139268,12.89999962,100.9101105,0,0.870000005,1.399999976,162,,-70,0.124595322,15.19999981,0.867590249,12.89999962,100.9980469,0,0.629999995,1.100000024,134,,-35,0.125038877,16.79999924,0.866518736,12.80000019,100.9833908,0,,,,,0,0.097766064,17.29999924,0.897540271,12.5,101.027359,0,0.349999994,1.100000024,156,,15,17.3,0.163887775,101.1299463,0.896504175,12.4,0,,,,,30
2016-07-08 05:00:00,0.112932801,15.60000038,0.840688229,12.89999962,100.8807983,3.662109375,0.99000001,1.5,162,,-70,0.124595322,15.19999981,0.854139268,12.89999962,100.9833908,3.662109375,0.75999999,1.200000048,134,,-35,0.125038877,16.70000076,0.840688229,12.89999962,100.9540787,12.81738281,,,,,0,0.097766064,17.20000076,0.872214377,12.69999981,100.9980469,23.80371094,0.479999989,1.299999952,153,,15,17.2,0.163887775,101.1006351,0.852979396,12.8,27.46582031,,,,,30
2016-07-08 06:00:00,0.112932801,15.5,0.846226513,13.39999962,100.8514862,9.155273438,0.959999979,1.5,164,,-70,0.124595322,15.19999981,0.853665173,13.5,100.9540787,9.155273438,0.75,1.100000024,137,,-35,0.125038877,16.60000038,0.848125517,13.60000038,100.9394226,29.296875,,,,,0,0.09730003,17,0.860975921,13.60000038,100.9687347,56.76269531,0.469999999,1.200000048,161,,15,17,0.163887775,101.0713239,0.837166686,13.8,60.42480469,,,,,30
2016-07-08 07:00:00,0.112932801,15.5,0.81743139,14.39999962,100.8368378,25.63476563,0.75999999,1.299999952,164,,-70,0.124151386,15.10000038,0.818225026,14.5,100.9394226,25.63476563,0.649999976,1.100000024,136,,-35,0.124595322,16.39999962,0.807726383,14.69999981,100.9101105,67.74902344,,,,,0,0.09730003,17,0.804672003,15.10000038,100.9687347,131.8359375,0.340000004,1.799999952,162,,15,17,0.163476872,101.0566683,0.771369344,15.3,144.6533203,,,,,30
2016-07-08 08:00:00,0.112479217,15.39999962,0.744501412,16.20000076,100.8075256,42.11425781,0.569999993,1.5,164,,-70,0.124151386,15.10000038,0.745170474,16.29999924,100.8954544,43.9453125,0.5,1.100000024,138,,-35,0.124595322,16.39999962,0.731077492,16.60000038,100.8807983,102.5390625,,,,,0,0.09730003,17,0.699342251,17.29999924,100.9540787,199.5849609,0.560000002,3.5,195,,15,17,0.163476872,101.0273571,0.670544962,17.5,225.2197266,,,,,30
2016-07-08 09:00:00,0.112479217,15.39999962,0.679407477,18.10000038,100.7782135,60.42480469,0.430000007,1.399999976,173,,-70,0.123707086,15,0.684729934,18.20000076,100.8514862,62.25585938,0.379999995,1.399999976,143,,-35,0.124151386,16.39999962,0.65896672,18.70000076,100.8368378,120.8496094,,,,,0,0.09730003,17.10000038,0.616869748,19.29999924,100.9247665,270.9960938,0.980000019,4.5,203,,15,17.2,0.163476872,100.9687347,0.595997681,19.5,329.5898438,,,,,30
2016-07-08 10:00:00,0.112025261,15.39999962,0.582037568,20.70000076,100.7195892,128.1738281,0.460000008,1.5,220,,-70,0.123707086,15,0.573839843,20.70000076,100.8075256,91.55273438,0.579999983,2,230,,-35,0.12326242,16.5,0.546575904,20.89999962,100.7782135,86.05957031,,,,,0,0.096833624,17.29999924,0.501038253,22.20000076,100.8807983,659.1796875,1.860000014,5.099999905,214,,15,17.5,0.163476872,100.9101124,0.485350306,22.6,648.1933594,,,,,30
2016-07-08 11:00:00,0.112025261,15.39999962,0.471546829,23.20000076,100.6902771,162.9638672,0.629999995,1.899999976,236,,-70,0.12326242,15.10000038,0.465208948,23.29999924,100.7489014,131.8359375,0.75,2.299999952,233,,-35,0.122371979,16.60000038,0.451978832,23.39999962,100.7342453,108.0322266,,,,,0,0.09636683,17.60000038,0.419813752,24.5,100.8514862,695.8007813,1.970000029,5.300000191,216,,15,18.1,0.163476872,100.8661456,0.411607099,24.7,682.9833984,,,,,30
2016-07-08 12:00:00,0.111570932,15.5,0.445848703,24.5,100.6316528,170.2880859,0.529999971,1.899999976,211,,-70,0.12326242,15.19999981,0.43411687,24.70000076,100.7049332,151.9775391,0.649999976,3,213,,-35,0.121033542,16.70000076,0.421254128,24.70000076,100.675621,166.6259766,,,,,0,0.095899656,18.10000038,0.399270624,25.60000038,100.8075256,732.421875,1.830000043,6.400000095,216,,15,19,0.163887775,100.8075232,0.385526944,25.8,730.5908203,,,,,30
2016-07-08 13:00:00,0.11111623,15.60000038,0.448028624,24.89999962,100.5876923,102.5390625,0.449999988,1.5,223,,-70,0.122817382,15.30000019,0.430158734,25.10000038,100.6463089,109.8632813,0.610000014,2,228,,-35,0.119243778,16.79999924,0.414509952,25.60000038,100.6316528,316.7724609,,,,,0,0.095432103,18.70000076,0.396494418,26.10000038,100.7489014,560.3027344,1.629999995,5.099999905,218,,15,20,0.163887775,100.7489008,0.388274829,26.2,576.7822266,,,,,30
2016-07-08 14:00:00,0.110661156,15.80000019,0.445848703,24.5,100.5730362,69.58007813,0.569999993,2,244,,-70,0.122817382,15.39999962,0.431531549,24.79999924,100.6316528,69.58007813,0.75999999,3,243,,-35,0.117897563,17,0.41759938,25.10000038,100.6169968,205.078125,,,,,0,0.095432103,19.39999962,0.41021046,25.39999962,100.7342453,305.7861328,1.649999976,5.099999905,216,,15,20.7,0.163887775,100.7489008,0.404714295,25.5,322.265625,,,,,30
2016-07-08 15:00:00,0.110205702,15.89999962,0.539999783,24.10000038,100.4997559,53.10058594,0.270000011,1.200000048,159,,-70,0.122817382,15.60000038,0.530267119,24.29999924,100.5730362,56.76269531,0.280000001,1.200000048,171,,-35,0.116548009,17.29999924,0.482981205,24.89999962,100.5437241,162.9638672,,,,,0,0.094964169,19.79999924,0.443683773,25.29999924,100.660965,247.1923828,1,5.199999809,209,,15,21,0.163887775,100.6902785,0.420044382,25.5,261.8408203,,,,,30
2016-07-08 16:00:00,0.110205702,16.10000038,0.584155023,23.20000076,100.4411316,27.46582031,0.340000004,1.200000048,148,,-70,0.122371979,15.69999981,0.587632358,23.29999924,100.529068,29.296875,0.330000013,1.299999952,154,,-35,0.116097413,17.5,0.523131669,24,100.4850998,80.56640625,,,,,0,0.094964169,20,0.491409898,24.5,100.6023483,131.8359375,0.819999993,3.900000095,202,,15,21.1,0.163887775,100.6170005,0.457103793,24.8,139.1601563,,,,,30
2016-07-08 17:00:00,0.109749876,16.20000076,0.656518042,22.70000076,100.3825073,27.46582031,0.200000003,0.400000006,115,,-70,0.122371979,15.80000019,0.666969836,22.79999924,100.4557877,31.12792969,0.159999996,0.600000024,115,,-35,0.116097413,17.60000038,0.594525993,23.39999962,100.4264755,86.05957031,,,,,0,0.094964169,20,0.546666443,24.10000038,100.529068,135.4980469,0.389999986,1.799999952,188,,15,21,0.163476872,100.5730337,0.481646781,24.5,142.8222656,,,,,30
2016-07-08 18:00:00,0.109749876,16.29999924,0.650370002,22.29999924,100.3238907,16.47949219,0.330000013,0.800000012,153,,-70,0.121926203,15.80000019,0.649852097,22.5,100.3971634,18.31054688,0.310000002,0.899999976,147,,-35,0.115646444,17.70000076,0.627312183,22.79999924,100.3678589,60.42480469,,,,,0,0.094964169,20,0.580583096,23.5,100.4704437,91.55273438,0.519999981,2.900000095,188,,15,20.9,0.163476872,100.4997557,0.499999812,24.1,97.04589844,,,,,30
2016-07-08 19:00:00,0.109293669,16.39999962,0.52397114,23.10000038,100.2652664,10.98632813,0.340000004,0.899999976,202,,-70,0.121926203,15.89999962,0.514178276,23.29999924,100.3385468,10.98632813,0.430000007,0.899999976,185,,-35,0.115646444,17.79999924,0.501098454,23.5,100.3238907,42.11425781,,,,,0,0.094964169,20,0.488731623,23.79999924,100.4264755,62.25585938,0.75,3.299999952,198,,15,20.8,0.163476872,100.455789,0.472306832,23.9,65.91796875,,,,,30
2016-07-08 20:00:00,0.110205702,16.5,0.728675783,19.20000076,100.3678589,0,0.939999998,8.399999619,296,1.05,-70,0.121926203,16,0.724151492,19.29999924,100.4411316,0,1.269999981,10.10000038,275,1.35,-35,0.120586656,17.89999962,0.728675783,19.20000076,100.4264755,0,,,,2.2,0,0.094964169,19.89999962,0.733173788,19.20000076,100.4997559,1.831054688,0.829999983,9.5,307,9.2,15,20.6,0.163476872,100.5730337,0.719679777,19.2,1.831054688,,,,2.2,30
2016-07-08 21:00:00,0.111570932,16.60000038,0.948212981,15.69999981,100.3825073,0,0.300000012,0.800000012,206,0.15,-70,0.12326242,16,0.970039189,15.80000019,100.4264755,0,0.469999999,1.100000024,147,0.05,-35,0.12813352,17.89999962,0.981189072,15.80000019,100.4264755,5.493164063,,,,0.1,0,0.094964169,19.70000076,0.96385622,15.89999962,100.4850998,3.662109375,,,,,15,20.3,0.163887775,100.5876893,0.953314355,15.8,5.493164063,,,,,30
2016-07-08 22:00:00,0.111570932,16.60000038,0.947739422,15.80000019,100.3971634,0,0.620000005,1.399999976,284,0.05,-70,0.123707086,16,0.974935055,15.89999962,100.4411316,0,0.49000001,1.100000024,250,,-35,0.130771756,17.79999924,0.98601383,15.89999962,100.4557877,0,,,,,0,0.094964169,19.39999962,0.96385622,15.89999962,100.4997559,0,,,,,15,19.9,0.163476872,100.5876893,0.958316832,15.9,0,,,,,30
2016-07-08 23:00:00,0.11111623,16.60000038,0.930619836,15.89999962,100.3971634,0,0.629999995,1.399999976,284,,-70,0.124595322,16,0.951622546,16.10000038,100.4557877,0,0.5,1.5,260,,-35,0.132523268,17.70000076,0.97349894,16.10000038,100.4557877,0,,,,,0,0.094495848,19.10000038,0.941205084,16,100.5144119,0,,,,,15,19.6,0.163476872,100.6023449,0.947238025,15.9,0,,,,,30
2016-07-09 00:00:00,0.11111623,16.60000038,0.932025731,15.5,100.4264755,0,0.670000017,1.5,279,,-70,0.125038877,16,0.959951878,15.60000038,100.4850998,0,0.49000001,1.5,253,,-35,0.134268954,17.60000038,0.976892173,15.60000038,100.4704437,0,,,,,0,0.094495848,18.79999924,0.949074984,15.5,100.529068,0,,,,,15,19.3,0.163065619,100.6463117,0.949462487,15.4,0,,,,,30
2016-07-09 01:00:00,0.110661156,16.5,0.921038032,15.30000019,100.4411316,0,0.639999986,1.299999952,275,,-70,0.125482067,16,0.943742812,15.39999962,100.5144119,0,0.469999999,1.299999952,253,,-35,0.135574386,17.5,0.966621459,15.39999962,100.5144119,0,,,,,0,0.094495848,18.60000038,0.944354832,15.19999981,100.5583801,0,,,,,15,19,0.162654016,100.6756229,0.950445942,15.1,0,,,,,30
2016-07-09 02:00:00,0.11111623,16.39999962,0.939261734,14.80000019,100.4557877,0,0.439999998,1,273,,-70,0.12636736,15.89999962,0.968667269,14.89999962,100.5437241,0,0.270000011,0.800000012,231,,-35,0.13644287,17.39999962,0.986386776,14.89999962,100.5583801,0,,,,,0,0.094495848,18.39999962,0.963040531,14.80000019,100.5876923,0,,,,,15,18.7,0.162654016,100.6902785,0.957095823,14.8,0,,,,,30
2016-07-09 03:00:00,0.11111623,16.39999962,0.939261734,14.80000019,100.4704437,0,0.790000021,1.399999976,278,,-70,0.12636736,15.89999962,0.968667269,14.89999962,100.5583801,0,0.589999974,1.399999976,252,,-35,0.137309894,17.29999924,0.980480313,14.89999962,100.5730362,0,,,,,0,0.094495848,18.20000076,0.963040531,14.80000019,100.6023483,0,,,,,15,18.5,0.162242063,100.704934,0.957095823,14.8,0,,,,,30
2016-07-09 04:00:00,0.110661156,16.29999924,0.933382571,14.5,100.4704437,0,0.569999993,1.600000024,268,,-70,0.126809448,15.80000019,0.963504195,14.60000038,100.5583801,0,0.49000001,1.399999976,244,,-35,0.137742862,17.20000076,0.981569946,14.60000038,100.5583801,0,,,,,0,0.094027147,18.10000038,0.963837028,14.39999962,100.6023483,0,,,,,15,18.3,0.162242063,100.6902785,0.957736779,14.4,0,,,,,30
2016-07-09 05:00:00,0.110661156,16.20000076,0.921350896,14.60000038,100.4850998,0,1.110000014,2.700000048,286,,-70,0.126809448,15.80000019,0.951322198,14.69999981,100.5876923,0,1.110000014,2.700000048,265,,-35,0.138607711,17.10000038,0.975548029,14.60000038,100.5730362,5.493164063,,,,,0,0.094027147,17.89999962,0.945504427,14.5,100.6169968,9.155273438,,,,0.2,15,18.1,0.162242063,100.7195896,0.945504448,14.5,10.98632813,,,,,30
2016-07-09 06:00:00,0.110661156,16.20000076,0.891704202,14.80000019,100.5144119,3.662109375,1.610000014,3,295,,-70,0.127251178,15.69999981,0.903763771,15,100.6316528,3.662109375,2.190000057,4.300000191,276,,-35,0.139039591,17,0.945041239,14.89999962,100.6169968,18.31054688,,,,,0,0.094027147,17.70000076,0.903695703,14.89999962,100.660965,31.12792969,,,,,15,17.9,0.162242063,100.7635564,0.903695696,14.9,32.95898438,,,,,30
2016-07-09 07:00:00,0.110205702,16.10000038,0.852228403,15.39999962,100.5437241,18.31054688,1.730000019,3.099999905,293,,-70,0.127251178,15.69999981,0.8526631,15.60000038,100.6463089,20.14160156,2.400000095,4.900000095,278,,-35,0.139039591,17,0.903484106,15.60000038,100.6463089,42.11425781,,,,,0,0.094027147,17.60000038,0.841989338,15.89999962,100.7049332,161.1328125,1.5,4.900000095,267,,15,17.8,0.162654016,100.7928676,0.836626763,16,170.2880859,,,,,30
2016-07-09 08:00:00,0.110661156,16,0.793768585,16.29999924,100.5730362,32.95898438,1.919999957,3.400000095,295,,-70,0.127251178,15.60000038,0.789056242,16.5,100.675621,38.45214844,2.809999943,5.400000095,281,,-35,0.139039591,16.89999962,0.805244744,16.60000038,100.660965,65.91796875,,,,,0,0.093558066,17.60000038,0.76925993,16.89999962,100.7342453,128.1738281,1.679999948,5.5,274,,15,17.8,0.163476872,100.7928676,0.750019233,17.3,236.2060547,,,,,30
2016-07-09 09:00:00,0.110661156,16,0.808366001,15.80000019,100.6316528,21.97265625,1.919999957,3.599999905,297,,-70,0.127251178,15.60000038,0.80360204,16,100.7195892,23.80371094,3.00999999,5.900000095,283,,-35,0.139039591,16.79999924,0.798487902,16.10000038,100.7195892,67.74902344,,,,0.05,0,0.093558066,17.60000038,0.788368762,16.29999924,100.7635574,111.6943359,1.519999981,5.099999905,283,,15,17.8,0.163476872,100.8661456,0.788368786,16.3,117.1875,,,,,30
2016-07-09 10:00:00,0.110661156,16,0.820767522,16.29999924,100.6902771,56.76269531,1.690000057,3.200000048,296,,-70,0.127251178,15.60000038,0.820921779,16.39999962,100.7782135,58.59375,2.609999895,4.699999809,280,,-35,0.139039591,16.79999924,0.805408061,16.70000076,100.7635574,133.6669922,,,,,0,0.093558066,17.60000038,0.790364623,17.10000038,100.8368378,260.0097656,1.419999957,5.099999905,282,,15,17.8,0.163476872,100.9101124,0.785232383,17.1,276.4892578,,,,,30
2016-07-09 11:00:00,0.110205702,16,0.830910563,15.89999962,100.7342453,36.62109375,1.659999967,3.400000095,305,,-70,0.127251178,15.60000038,0.831302464,16.10000038,100.8368378,40.28320313,2.779999971,4.800000191,288,,-35,0.139039591,16.79999924,0.820581794,16.20000076,100.8221817,109.8632813,,,,0.05,0,0.093558066,17.60000038,0.810382128,16.5,100.8807983,175.78125,1.570000052,5.099999905,306,,15,18,0.163476872,100.9833903,0.81555626,16.4,183.1054688,,,,,30
2016-07-09 12:00:00,0.110205702,15.89999962,0.800552309,17,100.7782135,76.90429688,1.639999986,3.599999905,299,,-70,0.127251178,15.60000038,0.800676942,17.20000076,100.8661423,87.890625,2.589999914,4.300000191,284,,-35,0.139039591,16.79999924,0.780634403,17.5,100.8514862,172.1191406,,,,,0,0.093558066,17.79999924,0.761273801,18,100.9247665,368.0419922,1.580000043,6.099999905,290,,15,18.2,0.163887775,100.9980459,0.756503348,18.1,380.859375,,,,,30
2016-07-09 13:00:00,0.110205702,16,0.735597849,17.5,100.8221817,34.79003906,1.779999971,4.400000095,299,,-70,0.127251178,15.60000038,0.726375759,17.70000076,100.9101105,36.62109375,2.849999905,6.800000191,284,,-35,0.139039591,16.89999962,0.712403834,17.89999962,100.8954544,102.5390625,,,,,0,0.094027147,17.89999962,0.703499913,18.10000038,100.9687347,164.7949219,1.679999948,5.699999809,290,,15,18.4,0.163887775,101.0273571,0.703499928,18.1,173.9501953,,,,,30
2016-07-09 14:00:00,0.109749876,16,0.694306552,18.20000076,100.8221817,62.25585938,1.840000033,3.599999905,301,,-70,0.127251178,15.60000038,0.680920184,18.39999962,100.9101105,67.74902344,3.140000105,5.900000095,286,,-35,0.138607711,16.89999962,0.663607359,18.70000076,100.8954544,190.4296875,,,,,0,0.094027147,18,0.651761651,19.10000038,100.9833908,287.4755859,1.899999976,5,292,,15,18.5,0.163887775,101.0273571,0.651761651,19.1,302.1240234,,,,,30
2016-07-09 15:00:00,0.109749876,16,0.643213809,19.20000076,100.8221817,71.41113281,1.840000033,3.599999905,308,,-70,0.127251178,15.60000038,0.622486472,19.5,100.9101105,76.90429688,3.089999914,5.599999905,291,,-35,0.137742862,17,0.602915585,19.89999962,100.8954544,221.5576172,,,,,0,0.094027147,18.10000038,0.592377067,20.29999924,100.9980469,324.0966797,1.909999967,5.699999809,313,,15,18.7,0.163887775,101.0127015,0.592377078,20.3,336.9140625,,,,,30
2016-07-09 16:00:00,0.109749876,16,0.644955039,19.60000038,100.8221817,51.26953125,1.24000001,2.700000048,306,,-70,0.127251178,15.60000038,0.628331661,19.79999924,100.9101105,54.93164063,2.210000038,4.199999809,291,,-35,0.137309894,17,0.608731627,20.20000076,100.8954544,157.4707031,,,,,0,0.094027147,18.29999924,0.598007619,20.60000038,100.9980469,236.2060547,1.450000048,4.099999905,309,,15,18.9,0.163887775,101.0273571,0.593883425,20.6,247.1923828,,,,,30
2016-07-09 17:00:00,0.109293669,16.10000038,0.641991556,20,100.8221817,43.9453125,0.860000014,2,315,,-70,0.127251178,15.69999981,0.62986815,20.20000076,100.9101105,43.9453125,1.549999952,3.200000048,300,,-35,0.137309894,17.10000038,0.60253185,20.70000076,100.8807983,170.2880859,,,,,0,0.094027147,18.5,0.595888734,21.10000038,100.9980469,210.5712891,1.029999971,3,324,,15,19,0.163887775,101.0127015,0.591889498,21.1,223.3886719,,,,,30
2016-07-09 18:00:00,0.109293669,16.20000076,0.723929167,19.60000038,100.8221817,23.80371094,0.349999994,1,27,,-70,0.127251178,15.69999981,0.672141194,20.20000076,100.8954544,27.46582031,0.689999998,1.799999952,315,,-35,0.136876568,17.20000076,0.631223857,20.70000076,100.8661423,120.8496094,,,,,0,0.094027147,18.60000038,0.623703957,21,100.9687347,139.1601563,0.589999974,2,349,,15,19.2,0.163887775,101.0127015,0.612116091,21.2,150.1464844,,,,,30
2016-07-09 19:00:00,0.109293669,16.20000076,0.803195059,18.60000038,100.7928696,10.98632813,0.360000014,0.600000024,106,,-70,0.127251178,15.69999981,0.802433491,18.79999924,100.8807983,14.6484375,0.430000007,0.800000012,81,,-35,0.136876568,17.29999924,0.75051558,19.5,100.8661423,71.41113281,,,,,0,0.094027147,18.70000076,0.764082074,19.39999962,100.9247665,76.90429688,0.400000006,0.699999988,96,,15,19.2,0.16429833,100.9980459,0.767803631,19.6,84.22851563,,,,,30
2016-07-09 20:00:00,0.109293669,16.29999924,0.849481165,17.79999924,100.8075256,1.831054688,0.430000007,0.899999976,108,,-70,0.127251178,15.69999981,0.848553598,18,100.8807983,3.662109375,0.479999989,0.899999976,93,,-35,0.136876568,17.39999962,0.814014614,18.20000076,100.8661423,21.97265625,,,,,0,0.094027147,18.70000076,0.823962271,18.10000038,100.9247665,25.63476563,0.419999987,0.800000012,98,,15,19.2,0.16429833,100.9980459,0.834006979,18,27.46582031,,,,,30
2016-07-09 21:00:00,0.109293669,16.29999924,0.869028211,16.5,100.7928696,0,0.50999999,0.899999976,138,,-70,0.127251178,15.80000019,0.873841405,16.70000076,100.8661423,0,0.600000024,0.899999976,116,,-35,0.137309894,17.39999962,0.858049095,16.70000076,100.8661423,0,,,,,0,0.094027147,18.60000038,0.874359667,16.5,100.8954544,0,0.519999981,0.800000012,114,,15,19,0.16429833,101.0127015,0.87994228,16.4,0,,,,,30
2016-07-09 22:00:00,0.109293669,16.29999924,0.885993421,16.10000038,100.7635574,0,0.460000008,0.699999988,143,,-70,0.127251178,15.80000019,0.907869816,16.10000038,100.8661423,0,0.529999971,0.800000012,119,,-35,0.137309894,17.39999962,0.896931589,16.10000038,100.8661423,0,,,,,0,0.094027147,18.39999962,0.908180356,16,100.8954544,0,0.469999999,0.800000012,116,,15,18.8,0.16429833,100.9980459,0.914001603,15.9,0,,,,,30
2016-07-09 23:00:00,0.109293669,16.29999924,0.891668022,16,100.7489014,0,0.519999981,1,138,,-70,0.127251178,15.80000019,0.913684487,16,100.8514862,0,0.620000005,1,116,,-35,0.137309894,17.39999962,0.902676225,16,100.8514862,0,,,,,0,0.094027147,18.29999924,0.914001584,15.89999962,100.8661423,0,0.439999998,1,120,,15,18.6,0.16429833,100.9833903,0.914289791,15.8,0,,,,,30
2016-07-10 00:00:00,0.109749876,16.29999924,0.892105699,15.69999981,100.7342453,0,0.49000001,1,144,,-70,0.127251178,15.80000019,0.914548635,15.69999981,100.8368378,0,0.5,1.200000048,119,,-35,0.137309894,17.29999924,0.903327167,15.69999981,100.8368378,0,,,,,0,0.094027147,18.10000038,0.926583886,15.39999962,100.8661423,0,0.270000011,0.899999976,143,,15,18.4,0.163887775,100.9540791,0.932767666,15.2,0,,,,,30
2016-07-10 01:00:00,0.109749876,16.29999924,0.897985578,15.39999962,100.7342453,0,0.400000006,0.899999976,131,,-70,0.126809448,15.69999981,0.920864224,15.39999962,100.8221817,0,0.439999998,0.800000012,115,,-35,0.137309894,17.20000076,0.915144563,15.39999962,100.8368378,0,,,,,0,0.094027147,18,0.938784003,15.10000038,100.8661423,0,0.300000012,0.699999988,136,,15,18.3,0.163887775,100.9540791,0.944843943,15,0,,,,,30
2016-07-10 02:00:00,0.109293669,16.20000076,0.880877972,15.5,100.7342453,0,0.389999986,0.800000012,148,,-70,0.126809448,15.69999981,0.897927225,15.5,100.8368378,0,0.519999981,0.800000012,118,,-35,0.137309894,17.20000076,0.886561036,15.5,100.8221817,0,,,,,0,0.094027147,17.89999962,0.897985578,15.39999962,100.8661423,0,0.49000001,0.899999976,117,,15,18.1,0.163887775,100.9540791,0.897985605,15.4,0,,,,,30
2016-07-10 03:00:00,0.109749876,16.20000076,0.869603455,15.60000038,100.7342453,0,0.330000013,0.800000012,162,,-70,0.126809448,15.69999981,0.88088423,15.69999981,100.8368378,0,0.379999995,0.699999988,125,,-35,0.137309894,17.10000038,0.858540416,15.80000019,100.8221817,0,,,,,0,0.094027147,17.79999924,0.869662821,15.69999981,100.8807983,0,0.419999987,1.399999976,133,,15,18,0.163887775,100.9687347,0.8696628,15.7,0,,,,,30
2016-07-10 04:00:00,0.109749876,16.10000038,0.875273526,15.69999981,100.6902771,0,0.419999987,1.299999952,143,,-70,0.126809448,15.69999981,0.875225782,15.89999962,100.7782135,0,0.479999989,1.299999952,119,,-35,0.137309894,17.10000038,0.85860759,15.89999962,100.7782135,0,,,,,0,0.094027147,17.70000076,0.869686365,15.89999962,100.8221817,0,0.460000008,1.399999976,124,,15,17.9,0.163887775,100.924768,0.86414697,15.9,0,,,,,30
2016-07-10 05:00:00,0.109749876,16.10000038,0.88088423,15.69999981,100.6463089,0,0.629999995,1.200000048,131,,-70,0.126809448,15.60000038,0.897564948,15.80000019,100.7342453,1.831054688,0.649999976,1.100000024,110,,-35,0.137309894,17,0.880840182,15.80000019,100.7342453,7.32421875,,,,,0,0.094027147,17.60000038,0.891990066,15.80000019,100.7635574,12.81738281,0.469999999,1.100000024,113,,15,17.8,0.163887775,100.8808012,0.89199004,15.8,14.6484375,,,,,30
2016-07-10 06:00:00,0.109749876,16.10000038,0.880524337,16.10000038,100.6316528,12.81738281,0.75,1.399999976,162,,-70,0.126809448,15.60000038,0.896662235,16.20000076,100.7049332,12.81738281,0.680000007,1.200000048,133,,-35,0.136876568,17,0.885793626,16.20000076,100.6902771,32.95898438,,,,,0,0.094027147,17.60000038,0.885307789,16.39999962,100.7342453,69.58007813,0.389999986,1.200000048,152,,15,17.8,0.163887775,100.85149,0.863519065,16.6,80.56640625,,,,,30
2016-07-10 07:00:00,0.109293669,16,0.856440902,17.29999924,100.6316528,29.296875,0.370000005,0.899999976,139,,-70,0.12636736,15.60000038,0.891914785,17.29999924,100.7049332,32.95898438,0.409999996,1,102,,-35,0.13644287,16.89999962,0.870707631,17.5,100.6902771,56.76269531,,,,,0,0.094027147,17.60000038,0.794406891,18.39999962,100.7635574,170.2880859,0.600000024,4.5,190,,15,17.8,0.163887775,100.8368344,0.737819967,19,199.5849609,,,,,30
2016-07-10 08:00:00,0.109293669,16,0.693352878,19.89999962,100.6169968,45.77636719,0.49000001,1.399999976,226,,-70,0.12636736,15.60000038,0.68907088,20,100.7049332,45.77636719,0.540000021,1.600000024,232,,-35,0.136008814,16.89999962,0.643203676,20.5,100.6902771,40.28320313,,,,,0,0.094027147,17.60000038,0.615885019,21.10000038,100.7928696,109.8632813,1.850000024,5.400000095,212,,15,17.8,0.163887775,100.8075232,0.575576583,22.1,386.3525391,,,,,30
2016-07-10 09:00:00,0.109293669,16,0.632005632,22.10000038,100.5730362,71.41113281,0.689999998,1.799999952,258,,-70,0.12636736,15.60000038,0.620638788,22.29999924,100.675621,62.25585938,0.879999995,2.5,251,,-35,0.135574386,17,0.594827831,22.60000038,100.6463089,34.79003906,,,,,0,0.094027147,17.60000038,0.580616713,23.10000038,100.7635574,162.9638672,1.909999967,5.400000095,217,,15,18,0.163887775,100.778212,0.540147894,24.3,552.9785156,,,,,30
2016-07-10 10:00:00,0.10883709,16.10000038,0.597130775,23.89999962,100.5583801,109.8632813,1,2.5,273,,-70,0.12636736,15.60000038,0.583492994,24,100.6463089,75.07324219,1.25,3.099999905,258,,-35,0.134704471,17,0.569903314,24.20000076,100.6316528,45.77636719,,,,,0,0.093558066,17.70000076,0.539750636,25.39999962,100.7635574,664.6728516,1.99000001,5.699999809,228,,15,18.5,0.163887775,100.7489008,0.527281055,25.6,637.2070313,,,,,30
2016-07-10 11:00:00,0.10883709,16.10000038,0.567791164,25.29999924,100.5437241,162.9638672,0.870000005,2.400000095,270,,-70,0.12636736,15.69999981,0.561585784,25.29999924,100.6169968,157.4707031,1.179999948,3.900000095,259,,-35,0.133833081,17.10000038,0.545751095,25.5,100.6023483,133.6669922,,,,,0,0.093088605,18,0.520173728,26.5,100.7195892,743.4082031,2.109999895,6.400000095,221,,15,19.1,0.163887775,100.704934,0.511225157,26.7,723.2666016,,,,,30
2016-07-10 12:00:00,0.108380139,16.29999924,0.550055981,26.20000076,100.5144119,164.7949219,0.870000005,2.599999905,273,,-70,0.12636736,15.69999981,0.535120189,26.29999924,100.6023483,170.2880859,1.200000048,3.5,261,,-35,0.132085949,17.20000076,0.525953412,26.5,100.5583801,239.8681641,,,,,0,0.092618756,18.5,0.501402438,27.5,100.6902771,759.8876953,1.820000052,5.199999809,225,,15,20,0.163887775,100.6756229,0.490186479,27.7,758.0566406,,,,,30
2016-07-10 13:00:00,0.107922807,16.39999962,0.545497239,26.70000076,100.4704437,115.3564453,0.670000017,2,243,,-70,0.1259249,15.89999962,0.530649781,26.89999962,100.5583801,148.3154297,0.829999983,3,242,,-35,0.130771756,17.39999962,0.510291874,27.20000076,100.529068,454.1015625,,,,,0,0.092618756,19.20000076,0.492687166,27.79999924,100.6463089,682.9833984,1.860000014,6.300000191,222,,15,20.9,0.16429833,100.6316561,0.479032159,28,693.9697266,,,,,30
2016-07-10 14:00:00,0.107922807,16.60000038,0.487331897,27.79999924,100.4264755,214.2333984,0.769999981,2.299999952,272,,-70,0.1259249,16,0.476509809,27.89999962,100.4997559,172.1191406,1.100000024,3.200000048,259,,-35,0.128574133,17.60000038,0.454934835,28.60000038,100.4850998,853.2714844,,,,,0,0.092618756,20,0.44451049,29,100.6023483,847.7783203,1.919999957,5.300000191,230,,15,21.8,0.16429833,100.6023449,0.434462458,29.2,858.7646484,,,,,30
2016-07-10 15:00:00,0.107922807,16.79999924,0.470736384,28.29999924,100.3678589,108.0322266,0.720000029,2.200000048,274,,-70,0.125482067,16.20000076,0.457583815,28.5,100.4411316,186.7675781,1.00999999,3.299999952,261,,-35,0.12636736,18,0.431960315,29.29999924,100.4264755,662.8417969,,,,,0,0.092618756,21.10000038,0.424550831,29.60000038,100.5583801,635.3759766,1.840000033,6.900000095,225,,15,22.7,0.164708535,100.5290669,0.4197264,29.6,653.6865234,,,,,30
2016-07-10 16:00:00,0.107465103,17.10000038,0.51410836,27.79999924,100.3238907,73.2421875,0.400000006,1.799999952,263,,-70,0.125482067,16.39999962,0.49729839,28.10000038,100.3825073,80.56640625,0.610000014,2,255,,-35,0.125038877,18.5,0.459493965,29,100.3678589,360.7177734,,,,,0,0.092618756,21.89999962,0.449273676,29.20000076,100.4850998,375.3662109,1.159999967,3.900000095,226,,15,23.1,0.164708535,100.4704446,0.441868068,29.2,393.6767578,,,,,30
2016-07-10 17:00:00,0.107465103,17.29999924,0.470437288,28.5,100.2506104,65.91796875,0.49000001,1.5,232,,-70,0.125482067,16.5,0.446912348,29.10000038,100.3385468,93.38378906,0.629999995,2,229,,-35,0.123707086,18.89999962,0.400848687,30.70000076,100.2945786,433.9599609,,,,,0,0.092148528,22.20000076,0.39629665,30.5,100.4411316,399.1699219,1.720000029,5.099999905,218,,15,23.2,0.164708535,100.4118222,0.389480704,30.6,432.1289063,,,,,30
2016-07-10 18:00:00,0.107465103,17.5,0.544533253,27.60000038,100.17733,38.45214844,0.319999993,1.100000024,160,,-70,0.125482067,16.70000076,0.543061495,27.89999962,100.2652664,49.43847656,0.310000002,1.200000048,150,,-35,0.122817382,19.10000038,0.484856367,29.60000038,100.2359543,294.7998047,,,,,0,0.091677912,22.20000076,0.433752418,30,100.3678589,280.1513672,1.029999971,3.900000095,213,,15,23.2,0.16429833,100.3385442,0.41017891,30,307.6171875,,,,,30
2016-07-10 19:00:00,0.107007027,17.60000038,0.501794875,27.29999924,100.1480179,14.6484375,0.370000005,1.200000048,195,,-70,0.125038877,16.79999924,0.487493157,27.70000076,100.2359543,27.46582031,0.469999999,1.299999952,186,,-35,0.121926203,19.39999962,0.426768214,29.89999962,100.1919861,188.5986328,,,,,0,0.091206916,22.10000038,0.412537068,29.79999924,100.3385468,153.8085938,1.279999971,4.199999809,210,,15,23.1,0.163887775,100.309233,0.405324386,29.7,181.2744141,,,,,30
2016-07-10 20:00:00,0.107007027,17.70000076,0.554460406,25.70000076,100.1333694,1.831054688,0.460000008,0.899999976,173,,-70,0.125038877,16.89999962,0.538740695,26,100.2066422,3.662109375,0.460000008,0.899999976,161,,-35,0.121926203,19.60000038,0.547399044,26.10000038,100.17733,32.95898438,,,,,0,0.091206916,22,0.550357938,26.10000038,100.2945786,29.296875,0.370000005,2.700000048,162,,15,22.9,0.163887775,100.309233,0.532407152,26.2,34.79003906,,,,,30
2016-07-10 21:00:00,0.107007027,17.79999924,0.702358663,22.89999962,100.1040573,0,0.579999983,1.100000024,165,,-70,0.125038877,16.89999962,0.698118806,23,100.17733,0,0.469999999,0.899999976,146,,-35,0.122817382,19.70000076,0.703022301,22.79999924,100.162674,0,,,,,0,0.091677912,21.70000076,0.715253055,22.60000038,100.2359543,0,0.289999992,0.899999976,148,,15,22.6,0.163887775,100.2945774,0.704305332,22.6,0,,,,,30
2016-07-10 22:00:00,0.107007027,17.89999962,0.751859605,21.10000038,100.0747452,0,0.680000007,1.299999952,168,,-70,0.125038877,17,0.751233399,21.20000076,100.1480179,0,0.589999974,1.100000024,152,,-35,0.12326242,19.60000038,0.760516405,21,100.1333694,0,,,,,0,0.091206916,21.39999962,0.784293473,20.5,100.1919861,0,0.310000002,1.200000048,203,,15,22.2,0.163476872,100.2652662,0.76238723,20.7,0,,,,,30
2016-07-10 23:00:00,0.107007027,17.89999962,0.779483676,19.89999962,100.0161209,0,0.800000012,1.600000024,168,,-70,0.125038877,17,0.778949738,20,100.1187134,0,0.680000007,1.399999976,144,,-35,0.12326242,19.5,0.802903235,19.60000038,100.1040573,0,,,,,0,0.091206916,21.10000038,0.818635762,19.20000076,100.1333694,0,0.419999987,1.399999976,213,,15,21.8,0.163476872,100.2359551,0.795178437,19.4,0,,,,,30
2016-07-11 00:00:00,0.107007027,17.89999962,0.790736079,19.39999962,99.97215271,0,0.939999998,1.799999952,169,,-70,0.124595322,17,0.780965984,19.60000038,100.0600891,0,0.910000026,1.5,144,,-35,0.12326242,19.29999924,0.805141747,19.20000076,100.045433,0,,,,,0,0.091206916,20.79999924,0.8358832,18.60000038,100.0894012,0,0.50999999,1.399999976,204,,15,21.4,0.163476872,100.1773327,0.801123696,19.1,0,,,,,30
2016-07-11 01:00:00,0.107007027,17.89999962,0.788664579,19.79999924,99.91352844,0,1.070000052,1.700000048,164,,-70,0.124595322,17,0.788096786,19.89999962,100.0014648,0,0.949999988,1.799999952,139,,-35,0.12326242,19.20000076,0.79793328,19.70000076,99.98680878,0,,,,,0,0.091206916,20.5,0.843938708,18.79999924,100.030777,0,0.529999971,1.399999976,184,,15,21.1,0.163065619,100.1187103,0.823754309,19.1,0,,,,,30
2016-07-11 02:00:00,0.107007027,17.79999924,0.78750962,20,99.86956787,0,1.080000043,1.799999952,159,,-70,0.124595322,16.89999962,0.791789532,20,99.94284058,0,0.930000007,1.5,135,,-35,0.12326242,19,0.796709836,19.89999962,99.92818451,0,,,,,0,0.091206916,20.20000076,0.836627722,19.20000076,99.98680878,0,0.519999981,1.399999976,165,,15,20.8,0.162654016,100.0747435,0.822493026,19.3,0,,,,,30
2016-07-11 03:00:00,0.107007027,17.79999924,0.807290673,19.60000038,99.82559967,0,1.080000043,1.700000048,162,,-70,0.124595322,16.89999962,0.81606555,19.60000038,99.89888,0,0.910000026,1.5,141,,-35,0.12326242,18.89999962,0.816737592,19.5,99.88422394,0,,,,,0,0.091206916,20,0.836627722,19.20000076,99.94284058,0,0.610000014,1.5,158,,15,20.6,0.162242063,100.0307767,0.827631743,19.2,0,,,,,30
2016-07-11 04:00:00,0.107007027,17.70000076,0.821832478,19.39999962,99.79628754,0,0.850000024,1.5,162,,-70,0.124595322,16.89999962,0.825567186,19.5,99.86956787,0,0.670000017,1.399999976,138,,-35,0.12326242,18.79999924,0.836627722,19.20000076,99.8549118,0,,,,,0,0.09073554,19.79999924,0.863153577,18.70000076,99.89888,0,0.409999996,1.299999952,174,,15,20.3,0.162242063,100.0014656,0.848550366,18.8,0,,,,,30
2016-07-11 05:00:00,0.106548563,17.70000076,0.85316205,18.79999924,99.78163147,0,0.699999988,1.200000048,166,,-70,0.124151386,16.79999924,0.872434795,18.70000076,99.88422394,1.831054688,0.49000001,1.299999952,143,,-35,0.12326242,18.70000076,0.883425534,18.5,99.86956787,7.32421875,,,,,0,0.091206916,19.60000038,0.901058137,18.10000038,99.89888,14.6484375,0.230000004,1.100000024,194,,15,20.2,0.162242063,100.0014656,0.88981363,18.3,16.47949219,,,,,30
2016-07-11 06:00:00,0.106548563,17.60000038,0.857371151,19.39999962,99.8109436,9.155273438,0.360000014,1,124,,-70,0.124151386,16.79999924,0.874129951,19.5,99.88422394,10.98632813,0.310000002,0.800000012,94,,-35,0.12326242,18.60000038,0.869715154,19.5,99.86956787,32.95898438,,,,,0,0.091206916,19.5,0.879582882,19.39999962,99.92818451,62.25585938,0.270000011,1.299999952,90,,15,20,0.162242063,100.0161212,0.869715135,19.5,67.74902344,,,,,30
2016-07-11 07:00:00,0.106548563,17.60000038,0.822886705,20.79999924,99.84025574,23.80371094,0.289999992,0.899999976,177,,-70,0.124151386,16.70000076,0.82087487,21,99.92818451,25.63476563,0.340000004,1.200000048,219,,-35,0.12326242,18.5,0.784375072,21.5,99.91352844,53.10058594,,,,,0,0.09073554,19.5,0.773948371,21.79999924,99.98680878,126.3427734,0.639999986,2.599999905,201,,15,19.9,0.162242063,100.0454323,0.759911567,22.1,148.3154297,,,,,30
2016-07-11 08:00:00,0.106548563,17.5,0.69045192,23.60000038,99.8549118,38.45214844,0.819999993,2.099999905,283,,-70,0.123707086,16.70000076,0.670681596,24,99.94284058,43.9453125,1.320000052,3,272,,-35,0.12326242,18.5,0.652129769,24.29999924,99.91352844,40.28320313,,,,,0,0.09073554,19.5,0.639920413,24.70000076,100.0014648,100.7080078,1.330000043,4.300000191,255,,15,20,0.162242063,100.0307767,0.61013746,25.5,360.7177734,,,,,30
2016-07-11 09:00:00,0.106089734,17.5,0.631599605,25.5,99.8549118,82.39746094,0.930000007,1.799999952,288,,-70,0.12326242,16.70000076,0.618086994,25.70000076,99.94284058,76.90429688,1.49000001,3,272,,-35,0.122371979,18.5,0.601246476,26,99.92818451,86.05957031,,,,,0,0.09073554,19.60000038,0.585481346,26.70000076,100.030777,236.2060547,1.330000043,3.700000048,258,,15,20.2,0.162242063,100.0454323,0.555902692,27.5,527.34375,,,,,30
2016-07-11 10:00:00,0.106089734,17.60000038,0.599081814,26.79999924,99.86956787,86.05957031,0.819999993,2.099999905,272,,-70,0.12326242,16.70000076,0.58366251,27,99.97215271,80.56640625,1.159999967,2.799999952,262,,-35,0.120586656,18.5,0.567965627,27.29999924,99.94284058,155.6396484,,,,,0,0.090263776,19.70000076,0.550490022,28,100.0600891,404.6630859,1.519999981,4.800000191,223,,15,20.7,0.162242063,100.0600879,0.538355978,28.3,426.6357422,,,,,30
2016-07-11 11:00:00,0.105630517,17.60000038,0.583152831,27.5,99.89888,128.1738281,1.00999999,2.5,282,,-70,0.12326242,16.79999924,0.571624458,27.60000038,100.0014648,109.8632813,1.529999971,3.700000048,269,,-35,0.119243778,18.60000038,0.559033871,27.89999962,99.95749664,124.5117188,,,,,0,0.090263776,20,0.538110495,28.79999924,100.0747452,585.9375,1.639999986,4.800000191,248,,15,21.2,0.162242063,100.0747435,0.523880602,29.1,587.7685547,,,,,30
2016-07-11 12:00:00,0.105630517,17.70000076,0.550748825,28.39999962,99.92818451,170.2880859,1.139999986,2.700000048,281,,-70,0.122817382,16.79999924,0.539846063,28.5,100.0014648,140.9912109,1.649999976,3.900000095,267,,-35,0.117448084,18.70000076,0.533616066,28.70000076,99.97215271,206.9091797,,,,,0,0.089791626,20.39999962,0.508978546,29.60000038,100.0894012,684.8144531,1.860000014,5.900000095,243,,15,21.9,0.162242063,100.0893991,0.501259152,29.7,686.6455078,,,,,30
2016-07-11 13:00:00,0.105170928,17.89999962,0.526992559,28.5,99.94284058,93.38378906,1.5,3.099999905,289,,-70,0.122817382,17,0.513287842,28.70000076,100.0161209,122.6806641,2.299999952,5.099999905,273,,-35,0.114743389,18.89999962,0.501947224,29,99.98680878,419.3115234,,,,,0,0.089791626,21,0.486868948,29.70000076,100.1040573,573.1201172,1.850000024,6.199999809,256,,15,22.7,0.162242063,100.1040547,0.479306066,29.8,578.6132813,,,,,30
2016-07-11 14:00:00,0.105170928,18,0.524426997,27.89999962,99.94284058,91.55273438,1.49000001,3.299999952,289,,-70,0.122371979,17.10000038,0.516084373,28,100.030777,84.22851563,2.109999895,4.099999905,271,,-35,0.112479217,19.10000038,0.504206657,28.39999962,100.0014648,296.6308594,,,,,0,0.089319095,21.70000076,0.492636353,28.79999924,100.1040573,386.3525391,1.779999971,6.800000191,254,,15,23.4,0.162654016,100.1187103,0.487279035,28.9,399.1699219,,,,,30
2016-07-11 15:00:00,0.104710966,18.20000076,0.504874706,28.20000076,99.92818451,86.05957031,1.5,2.900000095,293,,-70,0.121926203,17.20000076,0.49386397,28.39999962,100.0014648,95.21484375,2.380000114,4.5,274,,-35,0.109749876,19.29999924,0.477232039,28.89999962,99.97215271,338.7451172,,,,,0,0.089319095,22.20000076,0.468775094,29.29999924,100.1040573,406.4941406,1.769999981,5.599999905,266,,15,23.8,0.162242063,100.0893991,0.463637127,29.4,419.3115234,,,,,30
2016-07-11 16:00:00,0.104710966,18.29999924,0.500204861,28,99.89888,60.42480469,1.25999999,2.5,296,,-70,0.121926203,17.29999924,0.483740151,28.29999924,99.97215271,69.58007813,2.069999933,3.700000048,277,,-35,0.107007027,19.5,0.475381345,28.60000038,99.95749664,236.2060547,,,,,0,0.089319095,22.5,0.464292288,29.10000038,100.0747452,294.7998047,1.379999995,4.199999809,273,,15,24,0.162242063,100.0600879,0.459147825,29.2,309.4482422,,,,,30
2016-07-11 17:00:00,0.104250617,18.39999962,0.500959814,27.70000076,99.91352844,51.26953125,1.470000029,2.900000095,296,,-70,0.121480055,17.39999962,0.492482215,27.89999962,100.0014648,60.42480469,2.380000114,4.300000191,279,,-35,0.104710966,19.70000076,0.475764245,28.39999962,99.97215271,250.8544922,,,,,0,0.088846177,22.70000076,0.47009033,28.70000076,100.0747452,274.6582031,1.50999999,4.300000191,279,,15,24,0.162242063,100.0893991,0.464846624,28.8,292.96875,,,,,30
2016-07-11 18:00:00,0.104250617,18.5,0.519793153,26.70000076,99.89888,25.63476563,1.409999967,3,298,,-70,0.121480055,17.5,0.510891497,26.89999962,100.0014648,31.12792969,2.339999914,4,279,,-35,0.10286732,19.79999924,0.499198556,27.20000076,99.98680878,115.3564453,,,,,0,0.088846177,22.79999924,0.499037772,27.29999924,100.0747452,142.8222656,1.429999948,4.400000095,283,,15,24,0.162242063,100.0893991,0.493381986,27.4,153.8085938,,,,,30
2016-07-11 19:00:00,0.103789896,18.60000038,0.551430583,25.70000076,99.94284058,12.81738281,1.049999952,2,309,,-70,0.121480055,17.5,0.545159221,25.79999924,100.0161209,16.47949219,1.870000005,3.099999905,290,,-35,0.101943232,19.89999962,0.535764217,26,100.0014648,64.08691406,,,,,0,0.088846177,22.70000076,0.53556335,26.10000038,100.1040573,76.90429688,1.090000033,3.599999905,319,,15,23.8,0.162242063,100.1187103,0.529465676,26.2,84.22851563,,,,,30
2016-07-11 20:00:00,0.103789896,18.70000076,0.599432409,24.29999924,99.98680878,0,0.560000002,1,315,,-70,0.121033542,17.60000038,0.589040995,24.5,100.0747452,1.831054688,0.980000019,1.600000024,298,,-35,0.102405466,19.89999962,0.585786641,24.5,100.045433,7.32421875,,,,,0,0.088846177,22.5,0.592577934,24.39999962,100.1187134,12.81738281,0.50999999,1.600000024,342,,15,23.5,0.16182976,100.1626771,0.59284525,24.3,14.6484375,,,,,30
2016-07-11 21:00:00,0.103789896,18.70000076,0.658504307,23.10000038,100.045433,0,0.310000002,0.800000012,280,,-70,0.121033542,17.60000038,0.615141571,23.5,100.1333694,0,0.589999974,0.899999976,273,,-35,0.102405466,19.89999962,0.608229876,23.5,100.1187134,0,,,,,0,0.088846177,22.39999962,0.634005845,23,100.1919861,0,0.330000013,1,230,,15,23.2,0.16182976,100.2506106,0.637856352,22.9,0,,,,,30
2016-07-11 22:00:00,0.103789896,18.70000076,0.628243744,22.10000038,100.0894012,0,0.680000007,1.700000048,312,,-70,0.120586656,17.60000038,0.613206029,22.29999924,100.17733,0,1.120000005,2.400000095,299,,-35,0.10286732,19.79999924,0.613210976,22.20000076,100.162674,0,,,,,0,0.088846177,22.10000038,0.643770039,21.70000076,100.2506104,0,0.50999999,2.400000095,349,,15,22.8,0.161004102,100.2945774,0.639915151,21.7,0,,,,,30
2016-07-11 23:00:00,0.103789896,18.70000076,0.631990016,21.20000076,100.1333694,0,0.560000002,1.100000024,310,,-70,0.120586656,17.5,0.624174953,21.29999924,100.2212982,0,0.949999988,1.899999976,297,,-35,0.10286732,19.70000076,0.624040425,21.20000076,100.2066422,0,,,,,0,0.088846177,21.79999924,0.651622117,20.60000038,100.2799225,0,0.409999996,2.400000095,345,,15,,,,,,,,,,,30
2016-07-12 00:00:00,0.103328802,18.60000038,0.667999685,20.29999924,100.2066422,0,0.280000001,0.800000012,218,,-70,0.120139405,17.5,0.655652761,20.5,100.3092346,0,0.419999987,1.100000024,239,,-35,0.10286732,19.60000038,0.614828408,20.70000076,100.2799225,0,,,,,0,0.088846177,21.5,0.642792165,20.29999924,100.3532028,0,0.349999994,1.100000024,187,,15,,,,,,,,,,,30
2016-07-12 01:00:00,0.103328802,18.60000038,0.6932863,19.70000076,100.2066422,0,0.189999998,0.400000006,51,,-70,0.120139405,17.5,0.689046383,19.89999962,100.3092346,0,0.25999999,0.5,25,,-35,0.103328802,19.39999962,0.621015608,20.10000038,100.2799225,0,,,,,0,0.088372879,21.20000076,0.649998248,19.79999924,100.3532028,0,0.209999993,0.699999988,165,,15,,,,,,,,,,,30
2016-07-12 02:00:00,0.103328802,18.5,0.687970638,19.10000038,100.2066422,0,0.289999992,0.600000024,133,,-70,0.119691774,17.39999962,0.683695793,19.20000076,100.3238907,0,0.349999994,0.600000024,88,,-35,0.103328802,19.29999924,0.6834445,19.10000038,100.2945786,0,,,,,0,0.088372879,21,0.705776632,18.89999962,100.3532028,0,0.370000005,0.699999988,113,,15,,,,,,,,,,,30
2016-07-12 03:00:00,0.103328802,18.39999962,0.691451013,18.70000076,100.1919861,0,0.330000013,0.600000024,128,,-70,0.119691774,17.39999962,0.700732231,18.70000076,100.3092346,0,0.379999995,0.699999988,90,,-35,0.103789896,19.20000076,0.686810374,18.70000076,100.2799225,0,,,,,0,0.088372879,20.79999924,0.714258969,18.5,100.3532028,0,0.330000013,0.600000024,108,,15,,,,,,,,,,,30
2016-07-12 04:00:00,0.103328802,18.39999962,0.713136911,18.10000038,100.2066422,0,0.389999986,0.699999988,131,,-70,0.119691774,17.29999924,0.70867151,18.20000076,100.2945786,0,0.439999998,0.800000012,96,,-35,0.103789896,19,0.703499913,18.10000038,100.2799225,0,,,,,0,0.088372879,20.60000038,0.727042258,17.89999962,100.3385468,0,0.370000005,0.800000012,104,,15,,,,,,,,,,,30
2016-07-12 05:00:00,0.103328802,18.29999924,0.745605946,17.5,100.2066422,0,0.389999986,0.800000012,131,,-70,0.119243778,17.29999924,0.76061815,17.5,100.2945786,1.831054688,0.419999987,0.800000012,106,,-35,0.104250617,18.89999962,0.765436947,17.39999962,100.2652664,7.32421875,,,,,0,0.088372879,20.39999962,0.805761337,17.10000038,100.3238907,14.6484375,0.300000012,0.899999976,120,,15,,,,,,,,,,,30
2016-07-12 06:00:00,0.10286732,18.20000076,0.775789082,17.70000076,100.2212982,5.493164063,0.389999986,0.800000012,138,,-70,0.118795417,17.20000076,0.780736983,17.79999924,100.3238907,5.493164063,0.439999998,0.699999988,111,,-35,0.104250617,18.79999924,0.775826693,17.79999924,100.3092346,21.97265625,,,,,0,,,,,,,,,,,15,,,,,,,,,,,30
2016-07-12 07:00:00,0.10286732,18.10000038,0.77570802,18.20000076,100.2799225,9.155273438,0.300000012,0.800000012,247,,-70,0.118795417,17.10000038,0.770854592,18.29999924,100.3678589,9.155273438,0.400000006,1,271,,-35,0.103789896,18.70000076,0.756577969,18.39999962,100.3385468,32.95898438,,,,,0,,,,,,,,,,,15,,,,,,,,,,,30
2016-07-12 08:00:00,0.10286732,18,0.684442103,19.60000038,100.2652664,40.28320313,0.839999974,2,301,,-70,0.118346676,17.10000038,0.680205405,19.70000076,100.3678589,43.9453125,1.429999948,2.700000048,288,,-35,0.103328802,18.60000038,0.663391232,20,100.3532028,109.8632813,,,,,0,,,,,,,,,,,15,,,,,,,,,,,30
2016-07-12 09:00:00,0.102405466,18,0.62687695,20.60000038,100.3092346,54.93164063,0.889999986,2,299,,-70,0.118346676,17,0.61512816,20.79999924,100.4118195,60.42480469,1.549999952,3.200000048,286,,-35,0.101943232,18.60000038,0.599888027,21.10000038,100.3825073,113.5253906,,,,,0,,,,,,,,,,,15,,,,,,,,,,,30
2016-07-12 10:00:00,0.101943232,17.89999962,0.593871295,21.79999924,100.2799225,124.5117188,1.049999952,2.299999952,298,,-70,0.117897563,17,0.586448252,21.89999962,100.3678589,113.5253906,1.720000029,4,286,,-35,0.100554258,18.60000038,0.568609238,22.29999924,100.3532028,140.9912109,,,,,0,,,,,,,,,,,15,,,,,,,,,,,30
2016-10-25 20:00:00,0.164298326,10.80000019,0.975302994,6.900000095,101.6135788,0,0.209999993,0.899999976,27,,-70,0.139902279,11.19999981,0.971933067,7.099999905,101.657547,0,0.310000002,1,346,,-35,0.135574386,10.80000019,0.981850743,7.099999905,101.6722031,0,0.5,1.799999952,14,,0,0.208863562,9.7,0.978619652,7,101.7747924,0,0.37,1.1,42,,15,10.10000038,0.1497197,101.6428909,0.939022303,7.900000095,0,109,0.800000012,0.370000005,,30
2016-10-25 20:00:00,0.164298326,10.80000019,0.975302994,6.900000095,101.6135788,0,0.209999993,0.899999976,27,,-70,0.139902279,11.19999981,0.971933067,7.099999905,101.657547,0,0.310000002,1,346,,-35,0.135574386,10.80000019,0.981850743,7.099999905,101.6722031,0,0.5,1.799999952,14,,0,0.208863562,9.7,0.978619652,7,101.7747924,0,0.37,1.1,42,,15,9.8,0.205128108,101.3790914,0.943800001,9.5,67.74902344,,,,,30
2016-10-25 21:00:00,0.164298326,10.69999981,0.978209019,6.400000095,101.6428909,0,0.49000001,0.899999976,318,,-70,0.140333071,11.19999981,0.981827974,6.5,101.7161713,0,0.769999981,1.600000024,309,,-35,0.135574386,10.80000019,0.981827974,6.5,101.7015152,0,1.190000057,2,352,,0,0.208119083,9.4,0.984977059,6.3,101.8041036,0,0.78,1.4,3,,15,9.899999619,0.1497197,101.7015152,0.958647847,7,0,31,1.399999976,0.519999981,,30
2016-10-25 22:00:00,0.163887769,10.69999981,0.972088754,5.699999809,101.6722031,0,0.25,0.5,324,,-70,0.140333071,11.19999981,0.987070739,5.800000191,101.7454834,0,0.379999995,1.100000024,314,,-35,0.135574386,10.69999981,0.987070739,5.800000191,101.7308273,0,0.449999988,1.5,0,,0,0.208119083,9,0.983011128,5.7,101.8334148,0,0.36,1.1,12,,15,9.699999809,0.1497197,101.7601395,0.964020073,6.300000191,0,352,2.299999952,0.959999979,,30
2016-10-25 23:00:00,0.163887769,10.69999981,0.969963849,4.900000095,101.7015152,0,0.300000012,0.699999988,169,,-70,0.140763521,11.19999981,0.98615706,5,101.7601395,0,0.239999995,0.699999988,157,,-35,0.135574386,10.69999981,0.993058264,4.900000095,101.7601395,0,0.270000011,0.5,121,,0,0.206999919,8.7,0.988385339,4.8,101.8627259,0,0.37,0.7,160,,15,9.300000191,0.1497197,101.7894516,0.961166441,5.699999809,0,24,1.100000024,0.449999988,,30
2016-10-26 00:00:00,0.163887769,10.69999981,0.97871238,4.599999905,101.7454834,0,0.219999999,0.5,207,,-70,0.140763521,11.10000038,0.983603835,4.699999809,101.8041,0,0.180000007,0.5,226,,-35,0.135574386,10.60000038,1.002295732,4.599999905,101.7894516,0,0.159999996,0.699999988,187,,0,0.206626211,8.4,0.990504071,4.6,101.8920371,0,0.24,0.7,206,,15,9,0.150142252,101.8041,0.965129197,4.800000191,0,136,0.899999976,0.5,,30
2016-10-26 01:00:00,0.163887769,10.60000038,0.985583842,4.5,101.7601395,0,0.209999993,0.5,296,,-70,0.140763521,11.10000038,0.990504086,4.599999905,101.8187561,0,0.289999992,0.5,292,,-35,0.135574386,10.5,1.002295732,4.599999905,101.8041,0,0.409999996,1.200000048,335,,0,0.206252176,8.3,1.009332874,4.5,101.9066927,0,0.32,0.8,322,,15,8.699999809,0.150564432,101.8480682,0.966920614,4.599999905,0,172,1,0.289999992,,30
2016-10-26 02:00:00,0.163476869,10.60000038,1.004855871,5.699999809,101.7894516,0,0.310000002,0.699999988,350,,-70,0.140763521,11.10000038,1.001805186,5.900000095,101.8480682,0,0.430000007,1.399999976,329,,-35,0.135574386,10.5,1.012577176,5.900000095,101.8480682,0,1.210000038,3.599999905,1,,0,0.205877814,8.2,1.012577235,5.9,101.9506595,0,0.98,3,20,,15,8.5,0.150564432,101.8627243,0.973709345,4.5,0,342,1,0.340000004,,30
2016-10-26 03:00:00,0.163476869,10.5,0.999022007,6.400000095,101.8187561,0,0.379999995,0.899999976,354,,-70,0.140763521,11.10000038,1.002498031,6.5,101.8920364,0,0.439999998,1,334,,-35,0.135574386,10.39999962,1.002498031,6.5,101.8773804,0,1.480000019,3.5,6,,0,0.205877814,8.2,1.002498021,6.5,101.9946263,0,1.58,3.2,31,,15,8.399999619,0.150564432,101.9213486,0.991033018,5.900000095,0,7,3.5,1.24000001,,30
2016-10-26 04:00:00,0.162654012,10.5,0.999022007,6.400000095,101.8627243,0,0.159999996,0.699999988,292,,-70,0.140763521,11,1.002498031,6.5,101.9360046,0,0.200000003,1,298,,-35,0.135574386,10.30000019,1.002498031,6.5,101.9213486,0,0.720000029,2.299999952,2,,0,0.205503125,8.3,1.002498021,6.5,102.0239375,0,0.71,2.2,24,,15,8.399999619,0.150142252,101.9653168,0.981827974,6.5,0,16,4.199999809,2.069999933,,30
2016-10-26 05:00:00,0.163065612,10.5,1.005934,6.300000191,101.8920364,0,0.180000007,0.5,216,,-70,0.140763521,11,1.009428501,6.400000095,101.9653168,0,0.180000007,0.5,275,,-35,0.135574386,10.30000019,1.009428501,6.400000095,101.9506607,0,0.449999988,2,356,,0,0.205503125,8.4,1.016412497,6.3,102.0532487,0,0.47,1.6,5,,15,8.5,0.150142252,102.009285,0.981827974,6.5,0,17,2.799999952,0.970000029,,30
2016-10-26 06:00:00,0.163065612,10.5,1.002348423,6.199999809,101.9213486,0,0.189999998,0.5,315,,-70,0.140763521,11,1.005934,6.300000191,101.9799728,0,0.239999995,0.800000012,309,,-35,0.135574386,10.30000019,1.012899518,6.199999809,101.9946289,0,0.689999998,2,1,,0,0.204752763,8.4,1.012899517,6.2,102.0825598,0,0.6,1.4,10,,15,8.5,0.150142252,102.0532455,0.981246412,6.199999809,0,356,1.700000048,0.720000029,,30
2016-10-26 06:00:00,0.163065612,10.5,1.002348423,6.199999809,101.9213486,0,0.189999998,0.5,315,,-70,0.140763521,11,1.005934,6.300000191,101.9799728,0,0.239999995,0.800000012,309,,-35,0.135574386,10.30000019,1.012899518,6.199999809,101.9946289,0,0.689999998,2,1,,0,0.204752763,8.4,1.012899517,6.2,102.0825598,0,0.6,1.4,10,,15,8.5,0.150142252,102.023941,0.984977067,6.300000191,0,5,1.899999976,0.540000021,,30
2016-10-26 07:00:00,0.163065612,10.39999962,0.998670638,6.099999905,101.9799728,0,0.219999999,0.5,194,,-70,0.140763521,11,1.002348423,6.199999809,102.023941,0,0.230000004,0.600000024,216,,-35,0.135574386,10.30000019,1.009294748,6.099999905,102.0385895,0,0.150000006,0.600000024,150,,0,0.204752763,8.4,1.00929479,6.1,102.1411822,0,0.25,0.8,231,,15,8.5,0.1497197,102.1265259,0.981246412,6.199999809,0,201,0.899999976,0.280000001,,30
2016-10-26 08:00:00,0.163065612,10.39999962,1.005597115,6,102.0385895,1.831054688,0.170000002,0.5,75,,-70,0.140763521,10.89999962,1.009294748,6.099999905,102.0679016,1.831054688,0.180000007,0.5,312,,-35,0.135574386,10.30000019,1.009294748,6.099999905,102.0825577,9.155273438,0.219999999,1.399999976,6,,0,0.205128108,8.4,1.00559708,6,102.185149,18.31054688,0.33,1.3,324,,15,8.5,0.1497197,102.1704941,0.977422297,6.099999905,20.14160156,5,1.5,0.439999998,,30
2016-10-26 09:00:00,0.162654012,10.39999962,0.998670638,6.099999905,102.0679016,10.98632813,0.159999996,0.5,140,,-70,0.140333071,10.89999962,1.012899518,6.199999809,102.0972137,10.98632813,0.140000001,0.400000006,188,,-35,0.135574386,10.30000019,1.005934,6.300000191,102.1118698,31.12792969,0.180000007,1,345,,0,0.205503125,8.4,1.012899517,6.2,102.2291158,58.59375,0.3,1.3,293,,15,8.600000381,0.14929679,102.1998062,0.981246412,6.199999809,62.25585938,276,1.299999952,0.300000012,,30
2016-10-26 10:00:00,0.162654012,10.39999962,0.992163002,6.5,102.0825577,23.80371094,0.239999995,0.800000012,150,,-70,0.140333071,10.89999962,1.005884767,6.599999905,102.1265259,23.80371094,0.219999999,0.699999988,137,,-35,0.135574386,10.19999981,1.005884767,6.599999905,102.1411819,60.42480469,0.25999999,1.5,241,,0,0.206626211,8.6,0.998989817,6.7,102.2437714,117.1875,0.46,1.9,255,,15,8.699999809,0.148873523,102.1998062,0.96177572,6.800000191,130.0048828,201,2,0.49000001,,30
2016-10-26 11:00:00,0.162654012,10.39999962,0.965248346,6.900000095,102.0679016,32.95898438,0.300000012,0.699999988,181,,-70,0.140333071,10.89999962,0.998591483,7,102.1411819,34.79003906,0.25,0.699999988,187,,-35,0.135574386,10.19999981,0.994847476,7.199999809,102.1265259,87.890625,0.419999987,1.899999976,223,,0,0.207746355,8.8,0.929364238,7.3,102.2291158,162.9638672,0.8,2.2,245,,15,8.899999619,0.14802593,102.1851501,0.903597295,7.400000095,184.9365234,207,2.900000095,0.920000017,,30
2016-10-26 12:00:00,0.162654012,10.30000019,0.926392913,7.5,102.0679016,42.11425781,0.340000004,0.899999976,164,,-70,0.140333071,10.89999962,0.95190841,7.699999809,102.1411819,42.11425781,0.300000012,0.899999976,158,,-35,0.135574386,10.30000019,0.929632068,7.900000095,102.1411819,98.87695313,0.540000021,2.5,224,,0,0.208863562,9.2,0.892071163,7.9,102.2437714,194.0917969,0.83,2.6,242,,15,9.300000191,0.147176906,102.2144623,0.858040214,8,210.5712891,206,3.200000048,1.029999971,,30
2016-10-26 13:00:00,0.162654012,10.39999962,0.907623172,7.800000191,102.0679016,27.46582031,0.349999994,0.800000012,205,,-70,0.139902279,10.89999962,0.904672861,8,102.155838,29.296875,0.400000006,1.100000024,223,,-35,0.135574386,10.30000019,0.901461363,7.900000095,102.1265259,80.56640625,0.879999995,2.200000048,230,,0,0.210348614,9.5,0.873290717,7.9,102.2291158,140.9912109,1.27,2.6,242,,15,9.600000381,0.146751866,102.2144623,0.848713696,8,148.3154297,211,3.5,1.5,,30
2016-10-26 14:00:00,0.162654012,10.39999962,0.891335785,7.599999905,102.0385895,20.14160156,0.419999987,1.200000048,159,,-70,0.139902279,10.89999962,0.898168802,7.800000191,102.1411819,21.97265625,0.319999993,1.100000024,142,,-35,0.135139614,10.39999962,0.892071187,7.900000095,102.1118698,58.59375,0.419999987,1.600000024,171,,0,0.210719065,9.8,0.867366749,8,102.2144602,100.7080078,0.6,2,224,,15,10,0.146326452,102.2144623,0.842961073,8.100000381,104.3701172,189,3.299999952,0.779999971,,30
2016-10-26 15:00:00,0.16224207,10.39999962,0.900920033,7.599999905,102.0385895,9.155273438,0.389999986,0.899999976,171,,-70,0.139471114,10.89999962,0.913832128,7.699999809,102.1411819,9.155273438,0.25,0.699999988,169,,-35,0.135139614,10.39999962,0.901461363,7.900000095,102.1118698,31.12792969,0.379999995,1.899999976,190,,0,0.210719065,10,0.88268094,7.9,102.2144602,54.93164063,0.83,2.9,224,,15,10.10000038,0.145900697,102.1998062,0.848713696,8,56.76269531,197,3.200000048,1.269999981,,30
2016-10-26 16:00:00,0.16224207,10.5,0.91674298,7.5,102.0385895,7.32421875,0.409999996,0.899999976,168,,-70,0.139471114,10.89999962,0.913832128,7.699999809,102.1265259,9.155273438,0.270000011,0.800000012,163,,-35,0.135139614,10.5,0.917077601,7.800000191,102.1118698,31.12792969,0.379999995,1.700000048,177,,0,0.210719065,10,0.894793933,7.7,102.2144602,49.43847656,1.02,3.5,224,,15,10.10000038,0.145900697,102.1851501,0.875755787,7.699999809,51.26953125,198,4.099999905,1.659999967,,30
2016-10-26 17:00:00,0.161417112,10.5,0.935084343,6.900000095,102.0532455,0,0.319999993,0.699999988,161,,-70,0.139471114,11,0.938676,7,102.1411819,0,0.209999993,0.600000024,149,,-35,0.134704471,10.5,0.945138991,6.900000095,102.1265259,0,0.270000011,1.5,158,,0,0.210719065,9.9,0.935084322,6.9,102.2291158,0,0.85,3.3,224,,15,10.10000038,0.145474568,102.1704941,0.90492034,6.900000095,0,197,3.900000095,1.320000052,,30
2016-10-26 18:00:00,0.161829755,10.5,0.936583102,6.400000095,102.0679016,0,0.349999994,0.699999988,157,,-70,0.139039591,11,0.95082289,6.5,102.1265259,0,0.200000003,0.699999988,105,,-35,0.134704471,10.5,0.95082289,6.5,102.1411819,0,0.189999998,0.600000024,92,,0,0.210719065,9.7,0.940487834,6.5,102.2437714,0,0.39,1.7,207,,15,9.899999619,0.145474568,102.1851501,0.91350764,6.599999905,0,184,2.5,0.75999999,,30
2016-10-26 19:00:00,0.161829755,10.5,0.94306314,6.300000191,102.0679016,0,0.300000012,0.699999988,147,,-70,0.139039591,11,0.95739609,6.400000095,102.1265259,0,0.209999993,0.5,75,,-35,0.134704471,10.5,0.95739609,6.400000095,102.1265259,0,0.180000007,0.800000012,58,,0,0.210348614,9.5,0.946989597,6.4,102.2437714,0,0.23,1.7,208,,15,9.699999809,0.145048082,102.1851501,0.919817746,6.5,0,163,2.900000095,0.469999999,,30
2016-10-26 20:00:00,0.161417112,10.5,0.956174016,6.099999905,102.0825577,0,0.460000008,1.399999976,133,,-70,0.139039591,11,0.970695376,6.199999809,102.1265259,0,0.340000004,1.100000024,84,,-35,0.134704471,10.5,0.970695376,6.199999809,102.1265259,0,0.200000003,1,79,,0,0.210348614,9.3,0.966798167,6.1,102.2437714,0,0.2,1,46,,15,9.5,0.145048082,102.1704941,0.928491235,6.199999809,0,164,2.200000048,0.419999987,,30
2016-10-26 21:00:00,0.161417112,10.5,0.972088754,5.699999809,102.0825577,0,0.25999999,0.600000024,137,,-70,0.139039591,11,0.976223826,5.800000191,102.155838,0,0.159999996,0.400000006,81,,-35,0.134704471,10.5,0.972088754,5.699999809,102.1411819,0,0.140000001,0.5,37,,0,0.210348614,9.1,0.978852829,5.6,102.2437714,0,0.15,0.7,7,,15,9.399999619,0.144621253,102.1704941,0.950244069,5.699999809,0,171,1.200000048,0.349999994,,30
2016-10-26 22:00:00,0.161004096,10.5,0.970234931,5.400000095,102.0972137,0,0.200000003,0.5,146,,-70,0.139039591,10.89999962,0.974594533,5.5,102.155838,0,0.119999997,0.400000006,20,,-35,0.134268954,10.39999962,0.981387079,5.400000095,102.1411819,0,0.109999999,0.300000012,28,,0,0.209977839,9,0.977002618,5.3,102.258427,0,0.13,0.7,268,,15,9.199999809,0.144194052,102.1851501,0.947930694,5.400000095,0,130,1.200000048,0.270000011,,30
2016-10-26 23:00:00,0.161004096,10.39999962,0.978852808,5.599999905,102.1118698,0,0.200000003,0.5,168,,-70,0.139039591,10.89999962,0.983011127,5.699999809,102.1704941,0,0.119999997,0.400000006,146,,-35,0.134268954,10.39999962,0.989851177,5.599999905,102.155838,0,0.109999999,0.400000006,82,,0,0.209977839,8.8,0.989851175,5.6,102.258427,0,0.27,1.2,237,,15,9,0.144194052,102.1998062,0.961166441,5.699999809,0,193,1.5,0.529999971,,30
2016-10-27 00:00:00,0.160177037,10.39999962,0.980260968,5.900000095,102.0972137,0,0.25,0.600000024,176,,-70,0.139039591,10.89999962,0.991033018,5.900000095,102.155838,0,0.170000002,0.400000006,179,,-35,0.134268954,10.30000019,0.991033018,5.900000095,102.1411819,0,0.140000001,1,140,,0,0.209606739,8.7,0.991033039,5.9,102.2437714,0,0.32,1.3,233,,15,8.899999619,0.144194052,102.1851501,0.95871675,5.900000095,0,193,1.700000048,0.540000021,,30
2016-10-27 01:00:00,0.160590753,10.39999962,0.980260968,5.900000095,102.0679016,0,0.319999993,0.800000012,188,,-70,0.138607711,10.89999962,0.991033018,5.900000095,102.1265259,0,0.219999999,0.600000024,183,,-35,0.134268954,10.30000019,0.991033018,5.900000095,102.1118698,0,0.129999995,0.600000024,158,,0,0.209606739,8.6,0.991033039,5.9,102.2144602,0,0.46,1.5,227,,15,8.800000191,0.143766493,102.1704941,0.969488859,5.900000095,0,193,1.899999976,0.779999971,,30
2016-10-27 02:00:00,0.160177037,10.30000019,0.980260968,5.900000095,102.0532455,0,0.330000013,0.800000012,171,,-70,0.138607711,10.89999962,0.991033018,5.900000095,102.0972137,0,0.219999999,0.600000024,160,,-35,0.134268954,10.30000019,0.991033018,5.900000095,102.0825577,0,0.319999993,1.5,210,,0,0.209606739,8.6,0.991033039,5.9,102.1998046,0,0.64,1.9,236,,15,8.699999809,0.143766493,102.1411819,0.969488859,5.900000095,0,201,2.5,0.860000014,,30
2016-10-27 03:00:00,0.160177037,10.30000019,0.980260968,5.900000095,102.0679016,0,0.370000005,0.699999988,209,,-70,0.138607711,10.89999962,0.994899213,6,102.0972137,0,0.310000002,0.699999988,218,,-35,0.134268954,10.19999981,1.001805186,5.900000095,102.0972137,0,0.50999999,1.700000048,219,,0,0.209606739,8.5,0.991033039,5.9,102.2144602,0,0.86,2.2,229,,15,8.600000381,0.143338576,102.155838,0.969488859,5.900000095,0,199,2.200000048,1.00999999,,30
2016-10-27 04:00:00,0.160177037,10.30000019,0.983011127,5.699999809,102.0385895,0,0.330000013,0.800000012,179,,-70,0.138607711,10.89999962,0.997917712,5.800000191,102.0972137,0,0.230000004,0.600000024,168,,-35,0.134268954,10.19999981,0.993933499,5.699999809,102.0825577,0,0.200000003,1,149,,0,0.209235313,8.4,0.993933474,5.7,102.185149,0,0.43,1.4,221,,15,8.600000381,0.143338576,102.1411819,0.972088754,5.699999809,0,187,1.899999976,0.720000029,,30
2016-10-27 05:00:00,0.159762979,10.30000019,0.981387079,5.400000095,102.0385895,0,0.209999993,0.699999988,160,,-70,0.138175473,10.89999962,0.992539227,5.400000095,102.0825577,0,0.200000003,0.699999988,17,,-35,0.134268954,10.10000038,0.999462426,5.300000191,102.0679016,0,0.340000004,1.399999976,256,,0,0.209235313,8.4,0.999462448,5.3,102.185149,0,0.66,2.4,249,,15,8.5,0.143338576,102.1265259,0.965772688,5.300000191,0,210,2.700000048,0.709999979,,30
2016-10-27 06:00:00,0.159348577,10.19999981,0.985583842,4.5,102.0385895,0,0.5,0.899999976,137,,-70,0.138175473,10.80000019,1.002295732,4.599999905,102.0825577,0,0.310000002,0.899999976,107,,-35,0.134268954,10.10000038,1.002295732,4.599999905,102.0825577,0,0.200000003,0.5,77,,0,0.209235313,8.3,0.99745837,4.5,102.185149,0,0.25,0.9,141,,15,8.5,0.143338576,102.1411819,0.973709345,4.5,0,139,1.299999952,0.340000004,,30
2016-10-27 07:00:00,0.159348577,10.19999981,0.999311805,3.599999905,102.0532455,0,0.779999971,1.299999952,141,,-70,0.137742862,10.80000019,0.997802496,3.799999952,102.0972137,0,0.610000014,1.299999952,119,,-35,0.133833081,10,1.004854083,3.700000048,102.0972137,0,0.529999971,1.100000024,109,,0,0.208119083,8.2,1.011961338,3.6,102.2437714,0,0.48,1.2,154,,15,8.399999619,0.143338576,102.1704941,0.979732752,3.700000048,0,142,1.600000024,0.660000026,,30
2016-10-27 08:00:00,0.158933818,10.19999981,0.993646622,3.5,102.0532455,1.831054688,0.829999983,1.299999952,149,,-70,0.137742862,10.80000019,1.011961341,3.599999905,102.1118698,1.831054688,0.639999986,1.200000048,126,,-35,0.133833081,10,1.006385684,3.5,102.1118698,9.155273438,0.540000021,1,111,,0,0.207746355,8,1.011961338,3.6,102.258427,21.97265625,0.52,1.2,154,,15,8.199999809,0.142910302,102.1851501,0.986662328,3.599999905,25.63476563,144,2.799999952,0.699999988,,30
2016-10-27 09:00:00,0.158933818,10.19999981,1.002295732,4.599999905,102.0679016,10.98632813,0.610000014,1.299999952,164,,-70,0.137742862,10.80000019,1.007022977,4.699999809,102.1118698,10.98632813,0.409999996,0.899999976,151,,-35,0.133833081,9.899999619,1.007022977,4.699999809,102.1118698,27.46582031,0.280000001,1,123,,0,0.207746355,7.8,1.011641464,4.8,102.2291158,62.25585938,0.57,2.3,201,,15,8,0.142481655,102.1998062,0.98838532,4.800000191,80.56640625,180,4.099999905,1.100000024,,30
2016-10-27 10:00:00,0.158103243,10.10000038,1.005597115,6,102.1118698,29.296875,0.389999986,0.899999976,194,,-70,0.137742862,10.80000019,1.019918919,6.099999905,102.155838,29.296875,0.340000004,1,192,,-35,0.133396849,9.899999619,1.005934,6.300000191,102.155838,67.74902344,0.419999987,2.200000048,202,,0,0.208119083,7.9,1.009428471,6.4,102.258427,133.6669922,0.95,3,225,,15,8.100000381,0.142481655,102.2437744,0.988615513,6.400000095,150.1464844,196,4,1.480000019,,30
2016-10-27 11:00:00,0.158103243,10.10000038,0.991042197,7.400000095,102.1265259,10.98632813,0.560000002,1.200000048,250,,-70,0.137309894,10.69999981,1.013242245,7.5,102.1998062,10.98632813,0.730000019,2,251,,-35,0.133396849,9.800000191,0.973804057,7.800000191,102.1851501,31.12792969,1.340000033,3,222,,0,0.208491486,8.2,0.954895222,7.8,102.3023937,58.59375,1.68,3.6,234,,15,8.300000191,0.142052665,102.2730789,0.939022303,7.900000095,62.25585938,216,4.599999905,1.929999948,,30
2016-10-27 12:00:00,0.157687426,10.10000038,0.954895198,7.800000191,102.1411819,9.155273438,0.469999999,0.899999976,230,,-70,0.137309894,10.69999981,0.960631967,8,102.1998062,9.155273438,0.479999989,1.200000048,241,,-35,0.132960245,9.800000191,0.960631967,8,102.1998062,27.46582031,1.039999962,3,213,,0,0.2073733,8.5,0.951305466,8,102.3023937,51.26953125,1.67,4,224,,15,8.600000381,0.142481655,102.2584305,0.926330805,8.100000381,53.10058594,203,4.099999905,2.019999981,,30
2016-10-27 13:00:00,0.157271251,10.10000038,0.962110817,8.399999619,102.155838,16.47949219,0.50999999,1.600000024,240,,-70,0.137309894,10.69999981,0.97364074,8.5,102.2144623,16.47949219,0.639999986,2.299999952,254,,-35,0.132960245,9.899999619,0.967067719,8.600000381,102.2144623,45.77636719,1.320000052,3.799999952,220,,0,0.205128108,8.7,0.958113364,8.6,102.3170493,84.22851563,1.84,4.2,229,,15,8.800000191,0.142910302,102.2584305,0.933862448,8.699999809,87.890625,212,4.900000095,2.130000114,,30
2016-10-27 14:00:00,0.157271251,10.10000038,0.949982584,9,102.1411819,9.155273438,0.600000024,1.5,263,,-70,0.137309894,10.69999981,0.960908473,9.100000381,102.1998062,9.155273438,0.889999986,2.400000095,264,,-35,0.132960245,9.899999619,0.952251613,9.100000381,102.2144623,29.296875,1.320000052,4,232,,0,0.206252176,8.9,0.937254979,9.2,102.3023937,51.26953125,1.72,4.1,238,,15,9,0.142481655,102.2584305,0.920057654,9.199999809,53.10058594,223,5.599999905,2.019999981,,30
2016-10-27 15:00:00,0.157271251,10.10000038,0.954452336,9.199999809,102.155838,1.831054688,0.620000005,1.5,263,,-70,0.137309894,10.69999981,0.950168729,9.399999619,102.1998062,1.831054688,0.810000002,1.700000048,265,,-35,0.132960245,10,0.950168729,9.399999619,102.2291183,12.81738281,1.200000048,3.400000095,228,,0,0.2073733,9.1,0.941685096,9.4,102.3170493,23.80371094,1.53,3.6,236,,15,9.199999809,0.142052665,102.2730789,0.924717784,9.399999619,25.63476563,220,4.300000191,1.879999995,,30
2016-10-27 16:00:00,0.157271251,10.19999981,0.956585586,9.300000191,102.155838,0,0.469999999,1.100000024,223,,-70,0.137309894,10.80000019,0.960653543,9.5,102.1998062,0,0.430000007,1.299999952,239,,-35,0.132960245,10,0.960653543,9.5,102.2291183,5.493164063,0.800000012,3.200000048,211,,0,0.207746355,9.2,0.952226787,9.5,102.3170493,12.81738281,1.51,4,216,,15,9.300000191,0.142052665,102.2584305,0.926946402,9.5,12.81738281,199,4.300000191,2.039999962,,30
2016-10-27 17:00:00,0.156854734,10.19999981,0.958652377,9.399999619,102.1851501,0,0.419999987,0.899999976,221,,-70,0.136876568,10.80000019,0.969080329,9.5,102.2144623,0,0.349999994,0.899999976,245,,-35,0.132960245,10.19999981,0.962590039,9.600000381,102.2437744,0,0.850000024,2.599999905,211,,0,0.207746355,9.3,0.954219673,9.6,102.3317049,0,1.39,3.1,219,,15,9.399999619,0.141623303,102.2730789,0.92910862,9.600000381,0,200,3.900000095,1.830000043,,30
2016-10-27 18:00:00,0.156437859,10.19999981,0.967136025,9.399999619,102.1998062,0,0.319999993,0.699999988,200,,-70,0.136876568,10.80000019,0.962590039,9.600000381,102.2437744,0,0.239999995,0.600000024,208,,-35,0.132523268,10.19999981,0.962590039,9.600000381,102.2730789,0,0.330000013,1.600000024,181,,0,0.207746355,9.3,0.947833946,9.7,102.3610161,0,0.83,2.3,209,,15,9.399999619,0.141623303,102.3023911,0.931205273,9.699999809,0,189,3.5,1.299999952,,30
2016-10-27 19:00:00,0.156437859,10.19999981,0.960653543,9.5,102.2437744,0,0.270000011,0.600000024,220,,-70,0.13644287,10.80000019,0.970960379,9.600000381,102.2730789,0,0.239999995,0.699999988,256,,-35,0.132523268,10.30000019,0.972776949,9.699999809,102.3023911,0,0.439999998,1.799999952,212,,0,0.207746355,9.3,0.964462612,9.7,102.3903273,0,0.89,1.9,216,,15,9.399999619,0.141623303,102.3317032,0.939519584,9.699999809,0,198,2.700000048,1.25,,30
2016-10-27 20:00:00,0.156437859,10.30000019,0.979330719,9.600000381,102.2437744,0,0.319999993,0.699999988,246,,-70,0.13644287,10.80000019,0.974530935,9.800000191,102.2730789,0,0.389999986,0.800000012,266,,-35,0.132523268,10.30000019,0.982789695,9.800000191,102.3023911,0,0.689999998,2,219,,0,0.207746355,9.4,0.974530942,9.8,102.3903273,0,0.96,2.2,225,,15,9.5,0.141623303,102.3317032,0.949754715,9.800000191,0,209,2.799999952,1.080000043,,30
2016-10-27 21:00:00,0.156020626,10.30000019,0.969080329,9.5,102.2144623,0,0.349999994,0.699999988,168,,-70,0.13644287,10.89999962,0.979330719,9.600000381,102.2584305,0,0.280000001,0.899999976,139,,-35,0.132523268,10.30000019,0.979330719,9.600000381,102.2730789,0,0.310000002,1.200000048,119,,0,0.207746355,9.4,0.970960369,9.6,102.3756717,0,0.49,1.4,181,,15,9.5,0.141623303,102.3023911,0.945849299,9.600000381,0,172,2.099999905,0.769999981,,30
2016-10-27 22:00:00,0.156020626,10.30000019,0.97364074,8.5,102.2144623,0,0.529999971,0.899999976,152,,-70,0.136008814,10.89999962,0.982655942,8.5,102.2730789,0,0.389999986,0.800000012,116,,-35,0.132523268,10.30000019,0.982655942,8.5,102.2584305,0,0.400000006,0.800000012,101,,0,0.206999919,9.3,0.980263847,8.4,102.3610161,0,0.43,1.4,139,,15,9.399999619,0.141623303,102.3170471,0.955610394,8.5,0,132,1.899999976,0.689999998,,30
2016-10-27 23:00:00,0.155603051,10.30000019,0.975260556,8.199999809,102.1851501,0,0.670000017,1.100000024,163,,-70,0.136008814,10.89999962,0.993661702,8.199999809,102.2437744,0,0.50999999,1,141,,-35,0.132523268,10.39999962,0.993661702,8.199999809,102.2291183,0,0.469999999,0.899999976,114,,0,0.206626211,9,0.991173991,8.1,102.3317049,0,0.51,1.2,161,,15,9.300000191,0.141623303,102.287735,0.959522426,8.300000191,0,151,2.799999952,0.889999986,,30
2016-10-28 00:00:00,0.155603051,10.39999962,0.981910706,8.100000381,102.1704941,0,0.689999998,1.200000048,176,,-70,0.136008814,10.89999962,1.00043726,8.100000381,102.2291183,0,0.629999995,1.200000048,164,,-35,0.132523268,10.30000019,0.991173983,8.100000381,102.2144623,0,0.439999998,1.700000048,143,,0,0.206626211,8.8,0.991173991,8.1,102.3170493,0,0.78,2.7,201,,15,9.100000381,0.142052665,102.287735,0.966059983,8.199999809,0,177,3.400000095,1.190000057,,30
2016-10-28 01:00:00,0.156020626,10.39999962,0.980263829,8.399999619,102.1411819,0,0.50999999,1,177,,-70,0.136008814,10.89999962,1.007493377,8.399999619,102.1851501,0,0.5,0.899999976,169,,-35,0.132523268,10.30000019,0.998416901,8.399999619,102.1851501,0,0.310000002,1.100000024,138,,0,0.206252176,8.8,0.998416881,8.4,102.2877382,0,0.63,2.3,201,,15,9,0.142052665,102.2437744,0.980263829,8.399999619,0,180,3,1.190000057,,30
2016-10-28 02:00:00,0.156020626,10.39999962,0.984976351,8.600000381,102.0825577,0,0.569999993,1.100000024,188,,-70,0.136008814,10.89999962,1.002884984,8.600000381,102.1411819,0,0.600000024,1.299999952,180,,-35,0.132523268,10.30000019,0.996119916,8.699999809,102.1411819,0,0.479999989,2.400000095,168,,0,0.205128108,8.8,1.005013845,8.7,102.2437714,0,1.1,3.1,208,,15,9,0.142052665,102.1998062,0.971737862,8.800000191,0,187,3.900000095,1.769999981,,30
2016-10-28 03:00:00,0.155603051,10.39999962,0.987226009,8.699999809,102.0385895,0,0.460000008,1,210,,-70,0.136008814,10.89999962,0.998239815,8.800000191,102.0679016,0,0.449999988,1,209,,-35,0.132523268,10.30000019,0.998239815,8.800000191,102.0825577,0,0.610000014,2.599999905,204,,0,0.205503125,8.8,0.991516774,8.9,102.185149,0,1.25,3.8,216,,15,9,0.141623303,102.1411819,0.965193331,8.899999619,0,198,4.900000095,1.820000052,,30
2016-10-28 04:00:00,0.155603051,10.39999962,0.980571806,8.800000191,101.9506607,0,0.620000005,1.200000048,196,,-70,0.135574386,10.89999962,0.998239815,8.800000191,101.9799728,0,0.629999995,1.299999952,189,,-35,0.132523268,10.30000019,0.991516769,8.899999619,101.9946289,0,0.649999976,2.799999952,189,,0,0.205877814,8.8,0.958698045,9,102.0972154,0,1.59,4.6,211,,15,9,0.141193599,102.023941,0.941267192,9,0,189,5.800000191,2.5,,30
2016-10-28 05:00:00,0.155603051,10.39999962,0.958698034,9,101.9213486,0,0.579999983,1.100000024,212,,-70,0.135574386,10.89999962,0.993559778,9,101.9506607,0,0.519999981,1.200000048,209,,-35,0.132523268,10.30000019,0.954452336,9.199999809,101.9653168,0,0.860000014,3.299999952,206,,0,0.206252176,8.8,0.945853648,9.2,102.0972154,0,1.76,4.3,215,,15,9,0.140763521,102.009285,0.920057654,9.199999809,0,195,5.300000191,2.549999952,,30
2016-10-28 06:00:00,0.155603051,10.39999962,0.943594813,9.100000381,101.8773804,0,0.579999983,1.100000024,203,,-70,0.135574386,10.89999962,0.971649647,9.199999809,101.9066925,0,0.569999993,1.299999952,201,,-35,0.132523268,10.30000019,0.939503729,9.300000191,101.9066925,0,0.769999981,3.099999905,194,,0,0.206626211,8.9,0.930962779,9.3,102.0385931,0,1.62,4.3,214,,15,9,0.140333071,101.9799728,0.913880885,9.300000191,0,193,7.300000191,2.470000029,,30
2016-10-28 07:00:00,0.155185118,10.39999962,0.92865628,9.199999809,101.8627243,0,0.720000029,1.399999976,215,,-70,0.135574386,10.89999962,0.939503729,9.300000191,101.8920364,0,0.600000024,1.5,216,,-35,0.132085949,10.30000019,0.933201432,9.399999619,101.8920364,0,1.029999971,3.900000095,204,,0,0.206626211,8.9,0.910092858,9.5,102.0239375,0,1.97,5.1,215,,15,9.100000381,0.140333071,101.9653168,0.89323926,9.5,0,197,5.900000095,2.920000076,,30
2016-10-28 08:00:00,0.155185118,10.39999962,0.916234136,9.399999619,101.8334122,0,0.75,1.600000024,218,,-70,0.135139614,10.89999962,0.918519616,9.5,101.8773804,0,0.74000001,1.899999976,224,,-35,0.132085949,10.30000019,0.92073828,9.600000381,101.8627243,0,1.360000014,4.599999905,207,,0,0.206999919,8.9,0.897947949,9.7,101.9946263,1.831054688,2.3,5.6,216,,15,9.100000381,0.139902279,101.9506607,0.873004973,9.699999809,1.831054688,198,5.699999809,3.160000086,,30
2016-10-28 09:00:00,0.154766828,10.39999962,0.906262279,9.699999809,101.8041,0,0.769999981,1.700000048,229,,-70,0.135139614,10.89999962,0.902391195,9.899999619,101.8773804,0,0.839999974,3.099999905,231,,-35,0.131648242,10.30000019,0.904515505,10,101.8480682,5.493164063,1.450000048,4.699999809,205,,0,0.207746355,9,0.88821791,10,101.9653151,12.81738281,2.3,6,218,,15,9.100000381,0.139902279,101.9506607,0.871920347,10,12.81738281,196,6.400000095,3.039999962,,30
2016-10-28 10:00:00,0.154766828,10.39999962,0.88654846,10.30000019,101.8041,3.662109375,1.039999962,2.200000048,259,,-70,0.134704471,10.89999962,0.882673442,10.5,101.8920364,3.662109375,1.220000029,3.799999952,252,,-35,0.131210178,10.30000019,0.884637237,10.60000038,101.8480682,16.47949219,2.319999933,6.400000095,217,,0,0.207746355,9,0.868979924,10.6,101.9653151,29.296875,3.02,7.6,230,,15,9.199999809,0.139902279,101.9506607,0.853322625,10.60000038,31.12792969,212,10.19999981,3.640000105,,30
2016-10-28 11:00:00,0.15434818,10.39999962,0.880659401,10.80000019,101.7747955,12.81738281,1.149999976,2.5,261,,-70,0.134268954,10.89999962,0.874821782,10.89999962,101.8334122,14.6484375,1.379999995,3.299999952,252,,-35,0.131210178,10.39999962,0.882495642,10.89999962,101.8187561,38.45214844,2.720000029,6.900000095,215,,0,0.207746355,9.2,0.874821771,10.9,101.9360039,67.74902344,3.26,7.5,226,,15,9.300000191,0.139902279,101.9213486,0.846158326,11,71.41113281,211,12,3.710000038,,30
2016-10-28 12:00:00,0.153929189,10.39999962,0.872612298,11.19999981,101.7601395,3.662109375,1.5,3.099999905,272,,-70,0.134268954,11,0.874319077,11.30000019,101.8187561,5.493164063,1.700000048,4,262,,-35,0.131210178,10.39999962,0.88179189,11.30000019,101.8041,18.31054688,2.589999914,6.300000191,225,,0,0.207746355,9.4,0.866846288,11.3,101.9360039,32.95898438,3,6.8,241,,15,9.5,0.139902279,101.9213486,0.844427824,11.30000019,32.95898438,226,7.400000095,3.410000086,,30
2016-10-28 13:00:00,0.15350984,10.5,0.862816334,11.5,101.7454834,7.32421875,1.690000057,3.400000095,276,,-70,0.134268954,11,0.864454448,11.60000038,101.8041,7.32421875,1.99000001,4.199999809,264,,-35,0.131210178,10.5,0.871780336,11.60000038,101.7747955,23.80371094,2.829999924,7,231,,0,0.207746355,9.6,0.857128556,11.6,101.9213483,40.28320313,3.06,7,248,,15,9.699999809,0.139902279,101.8920364,0.842476785,11.60000038,42.11425781,232,8.199999809,3.420000076,,30
2016-10-28 14:00:00,0.15350984,10.5,0.914765716,11,101.7308273,5.493164063,1.460000038,2.700000048,276,,-70,0.134268954,11,0.922388792,11,101.7894516,5.493164063,1.690000057,4,262,,-35,0.131210178,10.5,0.923856854,11.10000038,101.7747955,20.14160156,2.430000067,7,229,0.05,0,0.202116159,9.7,0.908711637,11.1,101.9066927,34.79003906,2.79,6.7,247,,15,9.800000191,0.140763521,101.8627243,0.89356643,11.10000038,36.62109375,229,8,3.150000095,,30
2016-10-28 15:00:00,0.153090134,10.5,0.930011809,11,101.7308273,0,1.220000029,2.5,272,,-70,0.133833081,11,0.939002037,11.10000038,101.7747955,1.831054688,1.419999957,2.799999952,261,,-35,0.131210178,10.5,0.939002037,11.10000038,101.7747955,7.32421875,2.180000067,6.400000095,226,,0,0.198702513,9.8,0.931429428,11.1,101.9066927,14.6484375,2.44,5.6,241,,15,9.899999619,0.140763521,101.8480682,0.902702332,11.19999981,16.47949219,225,6.5,2.849999905,,30
2016-10-28 16:00:00,0.152670071,10.60000038,0.934101582,11.30000019,101.7454834,0,1.379999995,2.799999952,277,,-70,0.133833081,11.10000038,0.94278115,11.39999962,101.7894516,0,1.600000024,4.099999905,266,,-35,0.131210178,10.60000038,0.94278115,11.39999962,101.7747955,0,2.049999952,4.900000095,235,,0,0.199463415,10,0.935357653,11.4,101.9213483,1.831054688,2.22,5.7,250,,15,10,0.140763521,101.8627243,0.913087249,11.39999962,3.662109375,233,5.900000095,2.480000019,,30
2016-10-28 17:00:00,0.152670071,10.60000038,0.916981399,11.69999981,101.7601395,0,1.279999971,2.299999952,280,,-70,0.133396849,11.10000038,0.925405562,11.80000019,101.8041,0,1.49000001,3.200000048,267,,-35,0.130771756,10.60000038,0.925405562,11.80000019,101.7894516,0,1.860000014,5.199999809,236,,0,0.200222992,10,0.918175841,11.8,101.9213483,0,1.93,4.7,248,,15,10.10000038,0.140333071,101.8773804,0.89648664,11.80000019,0,234,6.199999809,2.200000048,,30
2016-10-28 18:00:00,0.152249649,10.60000038,0.916981399,11.69999981,101.7894516,0,0.980000019,2,278,,-70,0.132960245,11.10000038,0.925405562,11.80000019,101.8187561,0,1.100000024,2.400000095,265,,-35,0.130771756,10.69999981,0.932635307,11.80000019,101.8041,0,1.360000014,3.799999952,231,,0,0.200981249,10.1,0.918175841,11.8,101.9360039,0,1.41,4.1,246,,15,10.10000038,0.139902279,101.8920364,0.89648664,11.80000019,0,228,4.900000095,1.610000014,,30
2016-10-28 19:00:00,0.152249649,10.69999981,0.92306155,11.60000038,101.8041,0,1.029999971,2.200000048,285,,-70,0.132523268,11.10000038,0.925405562,11.80000019,101.8480682,0,1.340000033,3.299999952,273,,-35,0.130771756,10.69999981,0.932635307,11.80000019,101.8334122,0,1.379999995,3.599999905,250,,0,0.201738185,10.1,0.92425904,11.7,101.9799707,0,1.43,3.7,258,,15,10.10000038,0.139902279,101.9213486,0.902426124,11.69999981,0,244,5.300000191,1.649999976,,30
2016-10-28 20:00:00,0.151828885,10.69999981,0.9013291,12.19999981,101.8480682,0,1.50999999,2.799999952,303,,-70,0.132523268,11.10000038,0.896504164,12.39999962,101.9066925,0,2.420000076,3.700000048,287,,-35,0.130771756,10.69999981,0.903453827,12.39999962,101.8920364,0,2.170000076,4.599999905,298,,0,0.202493803,10,0.88955453,12.4,102.0092819,0,1.98,4.8,309,,15,10.10000038,0.139902279,101.9799728,0.868705571,12.39999962,0,291,5.599999905,2.569999933,,30
2016-10-28 21:00:00,0.151828885,10.69999981,0.877603531,12,101.8627243,0,1.519999981,2.599999905,297,,-70,0.132523268,11.19999981,0.878929198,12.10000038,101.9213486,0,2.349999905,3.799999952,281,,-35,0.130332962,10.80000019,0.886017323,12.10000038,101.8920364,0,2.039999962,4.300000191,286,,0,0.203624762,10.1,0.87184105,12.1,102.0385931,0,1.88,4.3,295,,15,10.19999981,0.139471114,102.009285,0.850576639,12.10000038,0,282,5,2.329999924,,30
2016-10-28 22:00:00,0.151407763,10.80000019,0.874319077,11.30000019,101.8920364,0,1.419999957,2.799999952,312,,-70,0.132523268,11.19999981,0.870190799,11.5,101.9506607,0,2.299999952,5,297,,-35,0.130332962,10.80000019,0.877565324,11.5,101.9506607,0,2.369999886,4.800000191,320,,0,0.20400109,10,0.862816326,11.5,102.0679043,0,2.01,6.5,331,,15,10.10000038,0.139471114,102.0532455,0.840692818,11.5,0,314,6.5,2.519999981,,30
2016-10-28 23:00:00,0.151407763,10.80000019,0.803863347,10.5,101.9506607,0,2.109999895,4.5,318,,-70,0.132085949,11.19999981,0.79322058,10.69999981,102.0385895,0,3.279999971,7.5,304,,-35,0.12989381,10.80000019,0.800997257,10.69999981,102.009285,0,3.630000114,8.100000381,333,,0,0.205128108,9.9,0.785443886,10.7,102.1411822,0,3.1,6.9,344,,15,10,0.139471114,102.1265259,0.769890547,10.69999981,0,326,8.5,3.609999895,0.2,30
2016-10-29 00:00:00,0.150986269,10.80000019,0.825472295,9.199999809,101.9653168,0,1.620000005,2.5,303,,-70,0.132085949,11.19999981,0.814430356,9.399999619,102.0385895,0,2.5,4,287,,-35,0.12989381,10.80000019,0.822914004,9.399999619,102.023941,0,2.160000086,4.400000095,298,,0,0.205877814,9.7,0.811389578,9.3,102.1411822,0,1.87,4,305,,15,9.899999619,0.139471114,102.1118698,0.788979411,9.399999619,0,291,4.800000191,2.420000076,,30
2016-10-29 01:00:00,0.150564432,10.80000019,0.840724409,8.300000191,101.9360046,0,1.690000057,2.700000048,296,,-70,0.131648242,11.30000019,0.829397678,8.5,102.0385895,0,2.5,4.300000191,280,,-35,0.129454285,10.80000019,0.844116092,8.399999619,102.023941,0,2.039999962,4.699999809,281,,0,0.206252176,9.4,0.831586096,8.3,102.1265266,0,1.94,4.2,287,,15,9.600000381,0.139471114,102.0972137,0.807810009,8.399999619,0,275,5.300000191,2.390000105,,30
2016-10-29 02:00:00,0.150564432,10.80000019,0.843414485,7.599999905,101.9360046,0,1.789999962,2.700000048,297,,-70,0.131210178,11.30000019,0.831987917,7.800000191,102.0385895,0,2.599999905,3.799999952,280,,-35,0.129454285,10.80000019,0.847198486,7.699999809,102.009285,0,2.140000105,3.900000095,281,,0,0.206252176,9.1,0.833830242,7.6,102.111871,0,2.02,4.9,289,,15,9.300000191,0.139039591,102.0972137,0.809122145,7.699999809,0,277,5.199999809,2.380000114,,30
2016-10-29 03:00:00,0.150142252,10.80000019,0.868774593,7,101.9213486,0,1.730000019,2.400000095,295,,-70,0.131210178,11.19999981,0.866797805,7.199999809,102.023941,0,2.400000095,3.5,280,,-35,0.129454285,10.69999981,0.882673919,7.099999905,101.9946289,0,1.870000005,4,279,,0,0.206626211,8.8,0.868774589,7,102.111871,0,1.81,4,285,,15,9.100000381,0.139039591,102.0825577,0.843003213,7.099999905,0,275,6,2.160000086,,30
2016-10-29 04:00:00,0.1497197,10.80000019,0.880784094,6.800000191,101.9066925,0,1.629999995,2.299999952,295,,-70,0.130771756,11.19999981,0.884810984,6.900000095,102.009285,0,2.309999943,3.400000095,281,,-35,0.129454285,10.69999981,0.890908003,6.800000191,101.9946289,0,1.860000014,3.700000048,278,,0,0.206626211,8.5,0.880784077,6.8,102.0972154,0,1.76,4.2,285,,15,8.800000191,0.138607711,102.0679016,0.860536158,6.800000191,0,274,4.400000095,2.059999943,,30
2016-10-29 05:00:00,0.1497197,10.69999981,0.882715225,6.599999905,101.8920364,0,1.690000057,2.299999952,294,,-70,0.130771756,11.19999981,0.886858284,6.699999809,101.9946289,0,2.390000105,3.599999905,281,,-35,0.129454285,10.60000038,0.903243542,6.599999905,101.9653168,0,1.860000014,4.099999905,280,,0,0.206252176,8.3,0.882715254,6.6,102.0679043,0,1.82,3.6,287,,15,8.5,0.138607711,102.0532455,0.862186968,6.599999905,0,275,4.599999905,2.190000057,,30
2016-10-29 06:00:00,0.14929679,10.69999981,0.890670717,6.300000191,101.8627243,0,1.570000052,2.299999952,295,,-70,0.130771756,11.10000038,0.894957185,6.400000095,101.9653168,0,2.279999971,3.200000048,282,,-35,0.129454285,10.5,0.91162771,6.300000191,101.9653168,0,1.74000001,3.700000048,281,,0,0.206252176,8,0.890670745,6.3,102.0532487,0,1.65,3.3,286,,15,8.300000191,0.138607711,102.009285,0.869713783,6.300000191,0,274,4.199999809,1.980000019,,30
2016-10-29 07:00:00,0.14929679,10.60000038,0.890670717,6.300000191,101.8773804,0,1.75,2.599999905,292,,-70,0.130332962,11.10000038,0.888812661,6.5,101.9799728,0,2.380000114,3.900000095,279,,-35,0.129454285,10.39999962,0.905363679,6.400000095,101.9799728,0,1.940000057,4.400000095,273,,0,0.206252176,7.8,0.890670745,6.3,102.0679043,0,1.87,4.3,281,,15,8.100000381,0.138175473,102.0385895,0.863737762,6.400000095,0,270,5.400000095,2.230000019,,30
2016-10-29 08:00:00,0.148873523,10.60000038,0.886858284,6.699999809,101.9213486,1.831054688,1.580000043,2.599999905,294,,-70,0.130332962,11.10000038,0.884810984,6.900000095,102.023941,1.831054688,2.269999981,3.700000048,281,,-35,0.129014403,10.30000019,0.890908003,6.800000191,102.009285,7.32421875,1.960000038,4,280,,0,0.206252176,7.6,0.880784077,6.8,102.111871,18.31054688,1.9,4.4,287,,15,7.900000095,0.138175473,102.0825577,0.854646981,6.900000095,21.97265625,274,4.900000095,2.319999933,,30
2016-10-29 09:00:00,0.148449913,10.5,0.856717587,7.699999809,101.9506607,7.32421875,2.079999924,3.799999952,297,,-70,0.12989381,11.10000038,0.854510248,7.900000095,102.0532455,7.32421875,3.190000057,5.300000191,282,,-35,0.129014403,10.30000019,0.854510248,7.900000095,102.023941,20.14160156,2.900000095,6,283,,0,0.206252176,7.6,0.845120049,7.9,102.1411822,38.45214844,2.84,7,292,,15,7.900000095,0.137742862,102.1265259,0.826339602,7.900000095,42.11425781,278,7.400000095,3.480000019,,30
2016-10-29 10:00:00,0.148449913,10.5,0.835039556,8.399999619,101.9360046,20.14160156,2.24000001,3.900000095,298,,-70,0.129454285,11,0.838412881,8.5,102.0385895,20.14160156,3.380000114,5.400000095,282,,-35,0.128574133,10.19999981,0.847428083,8.5,102.0385895,47.60742188,3.059999943,7.300000191,282,,0,0.206252176,7.8,0.829397692,8.5,102.1411822,91.55273438,3.05,8.3,290,,15,8,0.137742862,102.1265259,0.811367333,8.5,106.2011719,276,7.800000191,3.700000048,,30
2016-10-29 11:00:00,0.14802593,10.5,0.805946708,9.399999619,101.9066925,29.296875,2.619999886,5.199999809,298,,-70,0.129454285,11,0.80054462,9.5,101.9799728,27.46582031,3.960000038,7.699999809,282,,-35,0.12813352,10.19999981,0.808971405,9.5,101.9653168,65.91796875,3.700000048,8.399999619,285,,0,0.205877814,8.1,0.795183061,9.6,102.0972154,126.3427734,3.64,8,294,,15,8.199999809,0.137742862,102.0825577,0.764918625,9.699999809,199.5849609,281,9.100000381,4.389999866,,30
2016-10-29 12:00:00,0.147601604,10.39999962,0.777065158,10.10000038,101.8920364,34.79003906,2.880000114,5.300000191,304,,-70,0.129014403,11,0.75875771,10.30000019,101.9653168,32.95898438,4.380000114,7.099999905,286,,-35,0.12813352,10.19999981,0.766744614,10.30000019,101.9506607,82.39746094,4.119999886,8.100000381,294,,0,0.205877814,8.4,0.753708173,10.4,102.0825598,157.4707031,3.97,9.4,304,,15,8.5,0.138175473,102.0825577,0.737840652,10.39999962,270.9960938,290,11.10000038,4.929999828,,30
2016-10-29 13:00:00,0.147176906,10.39999962,0.748696208,10.5,101.8480682,23.80371094,2.910000086,5.599999905,302,,-70,0.129014403,10.89999962,0.735892892,10.60000038,101.9360046,23.80371094,4.429999828,7.699999809,284,,-35,0.127692536,10.19999981,0.738783836,10.69999981,101.9066925,67.74902344,4.269999981,10.80000019,291,,0,0.205503125,8.6,0.731007181,10.7,102.0385931,130.0048828,3.98,9.2,300,,15,8.899999619,0.137742862,102.0385895,0.715453863,10.69999981,142.8222656,287,11.60000038,5.03000021,,30
2016-10-29 14:00:00,0.146751866,10.5,0.753708184,10.39999962,101.8041,14.6484375,2.25,4.5,306,,-70,0.12813352,10.89999962,0.740815222,10.5,101.8920364,14.6484375,3.450000048,7.400000095,289,,-35,0.127692536,10.19999981,0.743721545,10.60000038,101.8627243,42.11425781,3.269999981,8.300000191,301,,0,0.205503125,8.9,0.735892909,10.6,101.9799707,75.07324219,2.98,7.4,309,,15,9.199999809,0.137742862,101.9946289,0.720235586,10.60000038,80.56640625,295,8.699999809,3.779999971,,30
2016-10-29 15:00:00,0.146326452,10.5,0.753708184,10.39999962,101.7747955,10.98632813,2.359999895,3.900000095,298,,-70,0.127692536,11,0.748696208,10.5,101.8480682,12.81738281,3.470000029,5.699999809,283,,-35,0.127692536,10.30000019,0.743721545,10.60000038,101.8334122,64.08691406,3.25,6.400000095,287,,0,0.205128108,9,0.735892909,10.6,101.9506595,78.73535156,3.07,6.5,296,,15,9.300000191,0.137742862,101.9506607,0.720235586,10.60000038,86.05957031,282,7.5,3.890000105,,30
2016-10-29 16:00:00,0.145900697,10.5,0.740815222,10.5,101.7454834,9.155273438,2.390000105,4.199999809,308,,-70,0.127692536,11,0.723230481,10.69999981,101.8334122,10.98632813,3.640000105,6.900000095,291,,-35,0.127251178,10.30000019,0.726157725,10.80000019,101.8187561,75.07324219,3.529999971,7.699999809,305,,0,0.205128108,9.1,0.71843265,10.8,101.9360039,75.07324219,3.21,7.7,313,,15,9.300000191,0.137742862,101.9360046,0.702982485,10.80000019,82.39746094,297,8.699999809,4.079999924,,30
2016-10-29 17:00:00,0.145048082,10.5,0.741539717,10,101.7601395,0,2.380000114,4.099999905,307,,-70,0.127692536,11,0.723642766,10.19999981,101.8480682,0,3.50999999,7,291,,-35,0.126809448,10.39999962,0.731683195,10.19999981,101.8187561,3.662109375,3.480000019,7.199999809,302,,0,0.205128108,9.2,0.72364274,10.2,101.9506595,3.662109375,3.04,6.8,312,,15,9.300000191,0.137742862,101.9506607,0.707561791,10.19999981,5.493164063,294,8.100000381,3.910000086,,30
2016-10-29 18:00:00,0.144194052,10.5,0.725980163,9.300000191,101.7747955,0,2.25999999,4.699999809,300,,-70,0.127251178,11,0.716276765,9.5,101.8480682,0,3.289999962,5.300000191,283,,-35,0.12636736,10.39999962,0.716276765,9.5,101.8334122,0,2.99000001,6.5,288,,0,0.204752763,9,0.712626559,9.4,101.9653151,0,2.71,6.3,296,,15,9.199999809,0.137309894,101.9506607,0.699423194,9.5,0,283,8.800000191,3.430000067,,30
2016-10-29 19:00:00,0.143338576,10.5,0.755983889,8.699999809,101.7894516,0,1.779999971,3.700000048,296,,-70,0.12636736,11,0.737056732,8.899999619,101.8627243,0,2.470000029,5.199999809,280,,-35,0.12636736,10.39999962,0.750888348,8.800000191,101.8627243,0,2.180000067,6,280,,0,0.204377091,8.8,0.747089938,8.7,101.9799707,0,1.98,6.3,287,,15,9,0.137309894,101.9506607,0.724386394,8.800000191,0,275,7,2.440000057,,30
2016-10-29 20:00:00,0.142910302,10.5,0.789656997,8.399999619,101.7894516,0,1.75,3,299,,-70,0.12636736,11,0.779026747,8.600000381,101.8627243,0,2.660000086,4.300000191,282,,-35,0.12636736,10.39999962,0.787981093,8.600000381,101.8773804,0,2.25,5.099999905,285,,0,0.20400109,8.5,0.784321731,8.5,101.9799707,0,2.04,5.2,292,,15,8.699999809,0.136876568,101.9360046,0.761118114,8.600000381,0,280,6.400000095,2.589999914,,30
2016-10-29 21:00:00,0.142910302,10.5,0.815171123,8.100000381,101.7894516,0,1.580000043,2.5,299,,-70,0.1259249,11,0.804171145,8.300000191,101.8627243,0,2.420000076,4,282,,-35,0.12636736,10.30000019,0.818850815,8.199999809,101.8773804,0,2.059999943,4,287,,0,0.203624762,8.3,0.809650263,8.2,101.9799707,0,1.84,4,293,,15,8.5,0.136876568,101.9360046,0.782048523,8.199999809,0,281,5.099999905,2.279999971,,30
2016-10-29 22:00:00,0.142481655,10.5,0.845300674,7.400000095,101.7894516,0,1.450000048,2.299999952,297,,-70,0.1259249,10.89999962,0.833830237,7.599999905,101.9066925,0,2.089999914,2.900000095,280,,-35,0.12636736,10.30000019,0.849193513,7.5,101.8773804,0,1.600000024,3.700000048,281,,0,0.203624762,8.1,0.845300697,7.4,101.9946263,0,1.42,3.9,288,,15,8.300000191,0.13644287,101.9653168,0.820243716,7.5,0,277,4,1.690000057,,30
2016-10-29 23:00:00,0.142481655,10.5,0.85292089,7.099999905,101.7894516,0,1.610000014,2.700000048,301,,-70,0.1259249,10.89999962,0.851101995,7.300000191,101.8920364,0,2.480000019,3.799999952,283,,-35,0.12636736,10.30000019,0.866797805,7.199999809,101.8773804,0,2.099999905,4.5,286,,0,0.203624762,7.9,0.85292087,7.1,101.9799707,0,1.76,4.7,296,,15,8.199999809,0.13644287,101.9653168,0.827397883,7.199999809,0,283,5.099999905,2.160000086,,30
2016-10-30 00:00:00,0.142052665,10.5,0.866470754,6.699999809,101.7894516,0,1.769999981,3,301,,-70,0.125482067,10.89999962,0.870660126,6.800000191,101.8773804,0,2.710000038,4,284,,-35,0.12636736,10.19999981,0.880784094,6.800000191,101.8627243,0,2.289999962,4.400000095,288,,0,0.203248104,7.7,0.86647076,6.7,101.9653151,0,2.05,5.6,297,,15,8,0.13644287,101.9360046,0.840288281,6.800000191,0,283,5.099999905,2.470000029,,30
2016-10-30 01:00:00,0.141623303,10.39999962,0.882715225,6.599999905,101.7894516,0,1.409999967,2.200000048,296,,-70,0.125038877,10.89999962,0.880784094,6.800000191,101.8627243,0,2.119999886,3.599999905,281,,-35,0.12636736,10.10000038,0.897052109,6.699999809,101.8627243,0,1.870000005,3.900000095,282,,0,0.203248104,7.5,0.882715254,6.6,101.9653151,0,1.72,3.9,290,,15,7.800000191,0.136008814,101.9360046,0.856276989,6.699999809,0,277,4.5,2.079999924,,30
2016-10-30 02:00:00,0.141623303,10.39999962,0.884810984,6.900000095,101.7601395,0,1.799999952,2.599999905,296,,-70,0.124595322,10.89999962,0.88874644,7,101.8627243,0,2.690000057,3.799999952,281,,-35,0.12636736,10,0.898732305,7,101.8480682,0,2.380000114,4.599999905,280,,0,0.202871118,7.4,0.884810971,6.9,101.9506595,0,2.3,4.4,289,,15,7.699999809,0.136008814,101.9066925,0.858788669,7,0,278,5.300000191,2.720000029,,30
2016-10-30 03:00:00,0.141193599,10.30000019,0.899147689,6.5,101.7454834,0,1.470000029,2.5,298,,-70,0.124595322,10.89999962,0.903243542,6.599999905,101.8334122,0,2.25,3.400000095,285,,-35,0.12636736,10,0.919817746,6.5,101.8187561,0,1.960000038,4,286,,0,0.202493803,7.4,0.899147709,6.5,101.9360039,0,1.75,3.6,293,,15,7.699999809,0.136008814,101.8920364,0.878477633,6.5,0,280,5.199999809,2.160000086,,30
2016-10-30 04:00:00,0.141193599,10.30000019,0.897052109,6.699999809,101.7161713,0,1.570000052,2.299999952,296,,-70,0.124595322,10.89999962,0.901031971,6.800000191,101.8041,0,2.359999895,4.099999905,282,,-35,0.12636736,9.899999619,0.91743964,6.699999809,101.8041,0,2.099999905,5,280,,0,0.202493803,7.4,0.897052081,6.7,101.9066927,0,1.94,4.6,288,,15,7.699999809,0.136008814,101.8627243,0.876664519,6.699999809,0,276,7.099999905,2.380000114,,30
2016-10-30 05:00:00,0.140763521,10.30000019,0.909482718,6.5,101.7015152,0,1.480000019,2.299999952,296,,-70,0.124151386,10.80000019,0.903243542,6.599999905,101.7894516,0,2.299999952,3.599999905,283,,-35,0.1259249,9.899999619,0.919817746,6.5,101.7747955,0,2.00999999,3.900000095,284,,0,0.202116159,7.4,0.90948274,6.5,101.8773815,0,1.93,5.2,291,,15,7.699999809,0.136008814,101.8480682,0.888812661,6.5,0,279,5.699999809,2.329999924,,30
2016-10-30 06:00:00,0.140763521,10.19999981,0.917940199,6.199999809,101.7015152,0,1.49000001,2.799999952,299,,-70,0.124151386,10.80000019,0.915770173,6.400000095,101.7894516,0,2.390000105,3.900000095,285,,-35,0.1259249,9.899999619,0.932584643,6.300000191,101.7747955,0,2.160000086,4.300000191,287,,0,0.202116159,7.3,0.911627703,6.3,101.8920371,0,1.99,4,295,,15,7.599999905,0.136008814,101.8480682,0.890670717,6.300000191,0,281,5.099999905,2.400000095,,30
2016-10-30 07:00:00,0.140333071,10.19999981,0.917940199,6.199999809,101.7015152,0,1.659999967,2.599999905,295,,-70,0.123707086,10.80000019,0.922106206,6.300000191,101.7747955,0,2.50999999,5.099999905,281,,-35,0.1259249,9.800000191,0.932584643,6.300000191,101.7747955,0,2.200000048,5.300000191,279,,0,0.202116159,7.3,0.917940187,6.2,101.8773815,0,2.08,5,287,,15,7.599999905,0.136008814,101.8480682,0.890670717,6.300000191,0,274,5.300000191,2.430000067,,30
2016-10-30 08:00:00,0.140333071,10.19999981,0.919817746,6.5,101.7308273,1.831054688,1.870000005,2.900000095,301,,-70,0.12326242,10.80000019,0.923771799,6.599999905,101.8187561,1.831054688,2.940000057,4.699999809,284,,-35,0.1259249,9.800000191,0.940487862,6.5,101.8041,5.493164063,2.789999962,5.300000191,290,,0,0.202116159,7.2,0.919817771,6.5,101.9066927,14.6484375,2.41,5.2,300,,15,7.5,0.135574386,101.8773804,0.892979383,6.599999905,16.47949219,286,6.300000191,2.940000057,,30
2016-10-30 09:00:00,0.139902279,10.19999981,0.914974988,6.900000095,101.7894516,12.81738281,1.799999952,2.900000095,308,,-70,0.122817382,10.80000019,0.925029635,6.900000095,101.8773804,12.81738281,2.890000105,4.900000095,291,,-35,0.1259249,9.800000191,0.925029635,6.900000095,101.8627243,31.12792969,2.859999895,6,301,,0,0.201738185,7.2,0.914974982,6.9,101.9653151,64.08691406,2.53,5.5,313,,15,7.5,0.135574386,101.9360046,0.88874644,7,73.2421875,297,6.199999809,3.130000114,,30
2016-10-30 10:00:00,0.139902279,10.19999981,0.893881202,7.400000095,101.8041,20.14160156,1.649999976,2.700000048,306,,-70,0.122817382,10.80000019,0.897443116,7.5,101.9213486,18.31054688,2.630000114,4.5,290,,-35,0.1259249,9.800000191,0.907093048,7.5,101.9066925,42.11425781,2.650000095,5.199999809,303,,0,0.201738185,7.4,0.891335776,7.6,102.0092819,84.22851563,2.35,5.6,313,,15,7.599999905,0.135574386,101.9799728,0.866236687,7.699999809,111.6943359,296,6.199999809,2.950000048,,30
2016-10-30 11:00:00,0.139039591,10.10000038,0.760143936,9.300000191,101.8334122,34.79003906,2.039999962,3.400000095,315,,-70,0.122371979,10.69999981,0.749983907,9.5,101.9066925,21.97265625,3.160000086,5.5,298,,-35,0.125038877,9.800000191,0.753331304,9.600000381,101.8920364,42.11425781,3.519999981,7,321,,0,0.201359882,7.6,0.821560187,8.8,102.0239375,58.59375,2.74,5.4,330,,15,7.800000191,0.136008814,102.009285,0.793104768,9,298.4619141,313,6.5,3.430000067,,30
2016-10-30 11:00:00,0.139039591,10.10000038,0.760143936,9.300000191,101.8334122,34.79003906,2.039999962,3.400000095,315,,-70,0.122371979,10.69999981,0.749983907,9.5,101.9066925,21.97265625,3.160000086,5.5,298,,-35,0.125482067,9.699999809,0.836029232,8.699999809,101.9213486,32.95898438,3.24000001,6.400000095,320,,0,0.201359882,7.6,0.821560187,8.8,102.0239375,58.59375,2.74,5.4,330,,15,7.800000191,0.136008814,102.009285,0.793104768,9,298.4619141,313,6.5,3.430000067,,30
2016-10-30 11:00:00,0.139471114,10.10000038,0.835039556,8.399999619,101.8334122,20.14160156,1.840000033,3,314,,-70,0.122817382,10.69999981,0.823798418,8.600000381,101.9066925,27.46582031,2.859999895,5.699999809,298,,-35,0.125038877,9.800000191,0.753331304,9.600000381,101.8920364,42.11425781,3.519999981,7,321,,0,0.201359882,7.6,0.821560187,8.8,102.0239375,58.59375,2.74,5.4,330,,15,7.800000191,0.136008814,102.009285,0.793104768,9,298.4619141,313,6.5,3.430000067,,30
2016-10-30 11:00:00,0.139471114,10.10000038,0.835039556,8.399999619,101.8334122,20.14160156,1.840000033,3,314,,-70,0.122817382,10.69999981,0.823798418,8.600000381,101.9066925,27.46582031,2.859999895,5.699999809,298,,-35,0.125482067,9.699999809,0.836029232,8.699999809,101.9213486,32.95898438,3.24000001,6.400000095,320,,0,0.201359882,7.6,0.821560187,8.8,102.0239375,58.59375,2.74,5.4,330,,15,7.800000191,0.136008814,102.009285,0.793104768,9,298.4619141,313,6.5,3.430000067,,30
2016-10-30 11:00:00,0.139039591,10.10000038,0.760143936,9.300000191,101.8334122,34.79003906,2.039999962,3.400000095,315,,-70,0.122817382,10.69999981,0.823798418,8.600000381,101.9066925,27.46582031,2.859999895,5.699999809,298,,-35,0.125482067,9.699999809,0.836029232,8.699999809,101.9213486,32.95898438,3.24000001,6.400000095,320,,0,0.201359882,7.6,0.821560187,8.8,102.0239375,58.59375,2.74,5.4,330,,15,7.800000191,0.136008814,102.009285,0.793104768,9,298.4619141,313,6.5,3.430000067,,30
2016-10-30 11:00:00,0.139471114,10.10000038,0.835039556,8.399999619,101.8334122,20.14160156,1.840000033,3,314,,-70,0.122371979,10.69999981,0.749983907,9.5,101.9066925,21.97265625,3.160000086,5.5,298,,-35,0.125482067,9.699999809,0.836029232,8.699999809,101.9213486,32.95898438,3.24000001,6.400000095,320,,0,0.201359882,7.6,0.821560187,8.8,102.0239375,58.59375,2.74,5.4,330,,15,7.800000191,0.136008814,102.009285,0.793104768,9,298.4619141,313,6.5,3.430000067,,30
2016-10-30 11:00:00,0.139471114,10.10000038,0.835039556,8.399999619,101.8334122,20.14160156,1.840000033,3,314,,-70,0.122371979,10.69999981,0.749983907,9.5,101.9066925,21.97265625,3.160000086,5.5,298,,-35,0.125038877,9.800000191,0.753331304,9.600000381,101.8920364,42.11425781,3.519999981,7,321,,0,0.201359882,7.6,0.821560187,8.8,102.0239375,58.59375,2.74,5.4,330,,15,7.800000191,0.136008814,102.009285,0.793104768,9,298.4619141,313,6.5,3.430000067,,30
2016-10-30 11:00:00,0.139039591,10.10000038,0.760143936,9.300000191,101.8334122,34.79003906,2.039999962,3.400000095,315,,-70,0.122817382,10.69999981,0.823798418,8.600000381,101.9066925,27.46582031,2.859999895,5.699999809,298,,-35,0.125038877,9.800000191,0.753331304,9.600000381,101.8920364,42.11425781,3.519999981,7,321,,0,0.201359882,7.6,0.821560187,8.8,102.0239375,58.59375,2.74,5.4,330,,15,7.800000191,0.136008814,102.009285,0.793104768,9,298.4619141,313,6.5,3.430000067,,30
2016-10-30 12:00:00,0.138607711,10.10000038,0.733390927,10,101.8041,21.97265625,1.820000052,3.099999905,313,,-70,0.121480055,10.69999981,0.715602279,10.19999981,101.9066925,21.97265625,2.75999999,5.800000191,296,,-35,0.125038877,9.800000191,0.721973121,10.39999962,101.8773804,60.42480469,3.180000067,6.199999809,319,,0,0.201359882,7.7,0.735027575,9.8,102.0239375,142.8222656,2.99,6.1,332,,15,8.100000381,0.136008814,102.023941,0.717093349,10,402.8320313,313,7.300000191,3.670000076,,30
2016-10-30 13:00:00,0.138607711,10.19999981,0.677767098,10.5,101.8187561,16.47949219,1.799999952,3.099999905,321,,-70,0.121033542,10.69999981,0.656632006,10.80000019,101.9066925,16.47949219,2.630000114,4.5,303,,-35,0.124595322,9.800000191,0.659953237,10.89999962,101.8773804,86.05957031,3.430000067,8.100000381,336,,0,0.201359882,7.9,0.702982486,10.8,102.0092819,340.5761719,2.68,5.4,326,,15,8.600000381,0.13644287,102.009285,0.69212383,10.69999981,401.0009766,311,8,3.289999962,,30
2016-10-30 14:00:00,0.137742862,10.19999981,0.656632006,10.80000019,101.8334122,10.98632813,1.779999971,3.099999905,322,,-70,0.121033542,10.69999981,0.640336037,11,101.9066925,12.81738281,2.569999933,5,306,,-35,0.124595322,9.800000191,0.627716303,11.30000019,101.9066925,208.7402344,3.519999981,6.5,339,,0,0.200981249,8.3,0.642661903,11.3,102.0092819,258.1787109,2.82,6.3,346,,15,9.199999809,0.13644287,102.023941,0.635189116,11.30000019,302.1240234,326,6.599999905,3.359999895,,30
2016-10-30 15:00:00,0.137309894,10.19999981,0.669886112,10.5,101.8480682,5.493164063,1.620000005,2.900000095,326,,-70,0.120586656,10.69999981,0.645463765,10.69999981,101.9506607,10.98632813,2.269999981,4.300000191,309,,-35,0.124151386,9.899999619,0.63271296,11,101.9213486,150.1464844,3.299999952,6.900000095,346,,0,0.200981249,8.8,0.619457875,11.5,102.0239375,183.1054688,2.88,5.4,350,,15,9.5,0.13644287,102.0385895,0.612083375,11.5,212.4023438,333,6.099999905,3.400000095,,30
2016-10-30 16:00:00,0.136876568,10.19999981,0.759722352,8.800000191,101.8773804,0,0.550000012,1.899999976,346,,-70,0.119691774,10.69999981,0.727173984,9.100000381,101.9653168,0,0.730000019,2.599999905,310,,-35,0.123707086,9.899999619,0.727173984,9.100000381,101.9506607,9.155273438,0.970000029,4.099999905,358,,0,0.200981249,9,0.632712966,11,102.0385931,102.5390625,2.58,6.5,356,,15,9.5,0.136008814,102.0532455,0.620952964,11.10000038,120.8496094,339,6.300000191,3,,30
2016-10-30 17:00:00,0.136876568,10.19999981,0.842924833,6.400000095,101.9066925,0,0.219999999,0.5,57,,-70,0.119691774,10.80000019,0.826802492,6.5,102.009285,0,0.219999999,0.5,46,,-35,0.123707086,10,0.847472548,6.5,101.9946289,0,0.270000011,0.800000012,80,,0,0.200981249,8.9,0.723381252,9,102.0679043,9.155273438,0.8,3.1,15,,15,9.399999619,0.136008814,102.0532455,0.705950379,9,9.155273438,3,3.599999905,1.080000043,,30
2016-10-30 18:00:00,0.13644287,10.19999981,0.887163281,5.300000191,101.9506607,0,0.280000001,0.5,40,,-70,0.119243778,10.80000019,0.881017923,5.400000095,102.0385895,0,0.319999993,0.600000024,4,,-35,0.123707086,10,0.841658711,6.599999905,102.023941,0,0.720000029,1.600000024,3,,0,0.200602286,8.6,0.832518327,6.4,102.0972154,0,0.34,0.7,118,,15,9.199999809,0.135574386,102.0679016,0.81732136,6.300000191,0,94,1,0.519999981,,30
2016-10-30 19:00:00,0.136008814,10.19999981,0.907962084,4.599999905,101.9653168,0,0.340000004,0.699999988,96,,-70,0.119243778,10.80000019,0.901636899,4.699999809,102.0532455,0,0.310000002,0.600000024,61,,-35,0.123707086,10,0.900680721,4.900000095,102.0385895,0,0.300000012,0.600000024,100,,0,0.200222992,8.2,0.838278348,6.3,102.1265266,0,0.52,1.1,31,,15,8.800000191,0.135139614,102.0972137,0.81732136,6.300000191,0,24,1.600000024,0.790000021,,30
2016-10-30 20:00:00,0.136008814,10.19999981,0.921636164,4.199999809,102.009285,0,0.370000005,0.800000012,119,,-70,0.118346676,10.69999981,0.933762908,4.199999809,102.0679016,0,0.289999992,0.800000012,79,,-35,0.123707086,9.899999619,0.933762908,4.199999809,102.0825577,0,0.340000004,0.600000024,99,,0,0.199843369,7.9,0.895360836,4.8,102.1558378,0,0.49,0.8,114,,15,8.399999619,0.135139614,102.0972137,0.872104704,4.800000191,0,96,1.200000048,0.74000001,,30
2016-10-30 21:00:00,0.136008814,10.19999981,0.934671223,4,102.023941,0,0.349999994,0.699999988,149,,-70,0.117897563,10.69999981,0.94034034,4.099999905,102.0825577,0,0.239999995,0.600000024,116,,-35,0.123707086,9.899999619,0.946969509,4,102.0825577,0,0.280000001,0.5,114,,0,0.199463415,7.5,0.928128135,4.1,102.185149,0,0.39,0.7,123,,15,8,0.135139614,102.1265259,0.90370369,4.099999905,0,110,1,0.589999974,,30
2016-10-30 22:00:00,0.135574386,10.10000038,0.934671223,4,102.0385895,0,0.389999986,0.699999988,157,,-70,0.117897563,10.69999981,0.94034034,4.099999905,102.0825577,0,0.209999993,0.5,121,,-35,0.123707086,9.800000191,0.946969509,4,102.0972137,0,0.340000004,0.600000024,112,,0,0.199463415,7.2,0.941265813,3.9,102.2144602,0,0.4,0.8,140,,15,7.699999809,0.135139614,102.155838,0.916495681,3.900000095,0,124,1,0.589999974,,30
2016-10-30 23:00:00,0.135574386,10.10000038,0.928880751,3.900000095,102.023941,0,0.409999996,0.600000024,163,,-70,0.117897563,10.60000038,0.934671223,4,102.0679016,0,0.200000003,0.400000006,132,,-35,0.12326242,9.699999809,0.941265821,3.900000095,102.0825577,0,0.270000011,0.5,119,,0,0.19908313,7,0.93467121,4,102.2144602,0,0.4,0.7,141,,15,7.5,0.135139614,102.155838,0.910074592,4,0,123,1,0.649999976,,30
2016-10-31 00:00:00,0.135139614,10,0.936064243,3.599999905,102.009285,0,0.340000004,0.699999988,154,,-70,0.117448084,10.60000038,0.942050695,3.700000048,102.0679016,0,0.189999998,0.400000006,122,,-35,0.12326242,9.600000381,0.948713779,3.599999905,102.0679016,0,0.25,0.400000006,116,,0,0.19908313,6.9,0.935439858,3.8,102.2144602,0,0.3,0.6,151,,15,7.300000191,0.134704471,102.1411819,0.910494804,3.799999952,0,133,0.800000012,0.5,,30
2016-10-31 01:00:00,0.135139614,10,0.943179965,3.299999952,101.9946289,0,0.469999999,0.899999976,152,,-70,0.116998233,10.5,0.943179965,3.299999952,102.0679016,0,0.25,0.5,133,,-35,0.12326242,9.600000381,0.962884903,3.200000048,102.0679016,0,0.300000012,0.5,116,,0,0.198702513,6.8,0.942690371,3.5,102.2144602,0,0.32,0.6,147,,15,7.099999905,0.134704471,102.1265259,0.923710287,3.400000095,0,132,1,0.49000001,,30
2016-10-31 02:00:00,0.135139614,9.899999619,0.950428247,2.599999905,101.9653168,0,0.589999974,1.200000048,157,,-70,0.116548009,10.5,0.957179904,2.700000048,102.023941,0,0.389999986,0.800000012,136,,-35,0.12326242,9.5,0.964005828,2.599999905,102.0532455,0,0.389999986,0.600000024,121,,0,0.198321566,6.7,0.949872949,3.2,102.2144602,0,0.4,0.8,145,,15,7,0.134704471,102.1118698,0.917339444,3.299999952,0,128,1,0.620000005,,30
2016-10-31 03:00:00,0.134704471,9.899999619,0.956750691,2.099999905,101.9506607,0,0.589999974,1.100000024,167,,-70,0.116548009,10.5,0.963918149,2.200000048,101.9946289,0,0.430000007,1.100000024,159,,-35,0.12326242,9.399999619,0.963918149,2.200000048,102.023941,0,0.360000014,0.899999976,141,,0,0.197940288,6.5,0.950428268,2.6,102.1704934,0,0.5,0.9,149,,15,6.900000095,0.134704471,102.0679016,0.923273146,2.599999905,0,128,1.200000048,0.769999981,,30
2016-10-31 04:00:00,0.134704471,9.800000191,0.963111103,1.799999952,101.9653168,0,0.439999998,0.800000012,184,,-70,0.116097413,10.5,0.956246614,1.899999976,102.023941,0,0.349999994,0.699999988,184,,-35,0.12326242,9.399999619,0.977485895,1.799999952,102.0385895,0,0.270000011,0.699999988,167,,0,0.197940288,6.3,0.95675067,2.1,102.1558378,0,0.49,1.3,167,,15,6.699999809,0.134704471,102.0532455,0.935978472,2.200000048,0,148,1.5,0.689999998,,30
2016-10-31 05:00:00,0.135139614,9.800000191,0.961537957,1.399999976,101.9506607,0,0.209999993,0.600000024,175,,-70,0.116097413,10.39999962,0.969349265,1.5,101.9946289,0,0.189999998,0.699999988,313,,-35,0.12326242,9.300000191,0.976330817,1.399999976,101.9946289,0,0.200000003,0.800000012,342,,0,0.197940288,6.1,0.963111089,1.8,102.1558378,0,0.51,1.2,182,,15,6.5,0.134704471,102.0679016,0.94873631,1.799999952,0,161,1.5,0.699999988,,30
2016-10-31 06:00:00,0.135139614,9.699999809,0.968468964,1.299999952,101.9360046,0,0.430000007,0.899999976,157,,-70,0.116097413,10.30000019,0.976330817,1.399999976,101.9946289,0,0.300000012,0.600000024,132,,-35,0.12326242,9.199999809,0.983368516,1.299999952,101.9946289,0,0.25999999,0.5,116,,0,0.197558677,5.9,0.961537929,1.4,102.1265266,0,0.28,1,160,,15,6.300000191,0.135139614,102.023941,0.946745038,1.399999976,0,140,1,0.379999995,,30
2016-10-31 07:00:00,0.134704471,9.699999809,0.969349265,1.5,101.9506607,0,0.639999986,1.299999952,169,,-70,0.115646444,10.30000019,0.977005482,1.600000024,101.9946289,0,0.430000007,1,153,,-35,0.12326242,9.100000381,0.984036386,1.5,101.9946289,1.831054688,0.360000014,0.800000012,128,,0,0.197176735,5.7,0.968468981,1.3,102.111871,0,0.37,0.7,143,,15,6.099999905,0.135139614,102.023941,0.953569472,1.299999952,0,127,1,0.540000021,,30
2016-10-31 08:00:00,0.134704471,9.600000381,0.970820546,2.099999905,101.9066925,10.98632813,0.639999986,1.200000048,172,,-70,0.115195103,10.30000019,0.977887988,2.200000048,101.9653168,9.155273438,0.449999988,0.800000012,166,,-35,0.12326242,9,0.991857767,2.200000048,101.9799728,25.63476563,0.319999993,0.600000024,149,,0,0.197176735,5.6,0.984036356,1.5,102.1265266,9.155273438,0.47,1,158,,15,6,0.135139614,102.023941,0.947841108,1.600000024,14.6484375,138,1.299999952,0.620000005,,30
2016-10-31 09:00:00,0.134704471,9.5,0.960184693,4.699999809,101.9213486,20.14160156,0.370000005,0.699999988,236,,-70,0.114743389,10.19999981,0.976757288,4.800000191,101.9799728,20.14160156,0.5,1,255,,-35,0.12326242,9,0.967922032,5.099999905,101.9799728,45.77636719,0.75999999,1.899999976,233,,0,0.196794461,5.5,0.970941019,2.3,102.111871,49.43847656,0.49,1.1,184,,15,5.900000095,0.135139614,102.009285,0.950276971,2.400000095,64.08691406,162,2,0.709999979,,30
2016-10-31 10:00:00,0.134268954,9.5,0.91162771,6.300000191,101.9066925,32.95898438,0.579999983,1.100000024,252,,-70,0.114743389,10.19999981,0.915770173,6.400000095,101.9946289,32.95898438,0.730000019,1.799999952,260,,-35,0.12326242,8.899999619,0.915770173,6.400000095,101.9946289,73.2421875,1.379999995,3,229,,0,0.196794461,5.6,0.949898107,5.2,102.0825598,95.21484375,0.95,2.5,243,,15,5.900000095,0.134704471,102.023941,0.920853019,5.300000191,115.3564453,225,2.099999905,0.939999998,,30
2016-10-31 11:00:00,0.134268954,9.5,0.887793183,7.5,101.8627243,32.95898438,0.5,1.100000024,231,,-70,0.114291303,10.10000038,0.881751537,7.599999905,101.9653168,32.95898438,0.639999986,1.600000024,248,,-35,0.12326242,8.899999619,0.885274827,7.699999809,101.9506607,82.39746094,1.279999971,3,224,,0,0.196794461,6,0.90536368,6.4,102.0972154,148.3154297,1.66,3.3,242,,15,6.199999809,0.134704471,102.0385895,0.878477633,6.5,175.78125,216,4.400000095,1.879999995,,30
2016-10-31 12:00:00,0.133833081,9.5,0.848369598,9.100000381,101.8041,34.79003906,0.720000029,1.799999952,262,,-70,0.114291303,10.10000038,0.83701241,9.300000191,101.8773804,34.79003906,0.920000017,2.299999952,254,,-35,0.12326242,9,0.839881301,9.399999619,101.8773804,113.5253906,1.620000005,3.5,225,,0,0.197176735,6.5,0.86623668,7.7,102.0532487,153.8085938,1.74,3.6,233,,15,6.699999809,0.134704471,102.023941,0.850896716,7.800000191,166.6259766,210,4.5,2.039999962,,30
2016-10-31 13:00:00,0.133396849,9.5,0.822653055,10.30000019,101.7747955,34.79003906,1.129999995,2.099999905,275,,-70,0.113838844,10.10000038,0.817178309,10.39999962,101.8627243,34.79003906,1.50999999,3.700000048,264,,-35,0.122817382,9.100000381,0.827506363,10.5,101.8334122,115.3564453,1.960000038,5.800000191,235,,0,0.197940288,7.1,0.825825001,9.5,101.9946263,221.5576172,2.03,4.3,236,,15,7.300000191,0.134704471,101.9799728,0.803553402,9.600000381,254.5166016,218,5.099999905,2.440000057,,30
2016-10-31 14:00:00,0.133396849,9.5,0.844249845,10.19999981,101.7454834,9.155273438,1.070000052,2,282,,-70,0.112932801,10.19999981,0.838626921,10.30000019,101.8334122,9.155273438,1.450000048,3.099999905,270,,-35,0.122817382,9.199999809,0.854600787,10.30000019,101.7894516,29.296875,1.549999952,4.599999905,250,,0,0.197558677,7.7,0.80635074,10.6,101.9506595,188.5986328,2.31,5.6,251,,15,7.800000191,0.134704471,101.9506607,0.785443902,10.69999981,205.078125,238,6,2.569999933,,30
2016-10-31 15:00:00,0.133396849,9.600000381,0.873004973,9.699999809,101.7161713,0,0.74000001,1.399999976,272,,-70,0.112932801,10.19999981,0.875426114,9.800000191,101.7894516,0,0.850000024,2.099999905,260,,-35,0.122817382,9.300000191,0.889633596,9.699999809,101.7747955,5.493164063,1.25999999,3.299999952,221,,0,0.197558677,8.2,0.830640007,10.3,101.9213483,51.26953125,1.81,4.6,263,,15,8.300000191,0.134704471,101.9066925,0.814666152,10.30000019,53.10058594,249,4.800000191,2.069999933,,30
2016-10-31 16:00:00,0.132960245,9.699999809,0.913880885,9.300000191,101.6722031,0,0.709999979,1.399999976,273,,-70,0.112932801,10.30000019,0.916234136,9.399999619,101.7454834,0,0.839999974,1.600000024,262,,-35,0.122817382,9.399999619,0.930962801,9.300000191,101.7454834,0,1.210000038,3.200000048,229,,0,0.197176735,8.5,0.873004951,9.7,101.8920371,12.81738281,1.37,3.4,240,,15,8.600000381,0.134704471,101.8773804,0.850649893,9.800000191,12.81738281,226,3.400000095,1.570000052,,30
2016-10-31 17:00:00,0.132523268,9.699999809,0.949982584,9,101.7015152,0,0.620000005,1.100000024,276,0.05,-70,0.112479217,10.30000019,0.952251613,9.100000381,101.7308273,0,0.75999999,1.399999976,274,,-35,0.122817382,9.600000381,0.967413485,9,101.7454834,0,0.709999979,2,239,0.1,0,0.196794461,8.5,0.913880893,9.3,101.8627259,0,1.33,3.2,243,,15,8.699999809,0.134704471,101.8187561,0.890783191,9.399999619,0,225,4.199999809,1.5,,30
2016-10-31 18:00:00,0.132523268,9.800000191,0.958698034,9,101.7015152,0,0.50999999,0.800000012,270,,-70,0.112025261,10.39999962,0.969565272,9.100000381,101.7161713,0,0.660000026,1.200000048,267,0.05,-35,0.122817382,9.600000381,0.976128936,9,101.7308273,0,0.75999999,1.799999952,226,0.1,0,0.193724288,8.5,0.958698045,9,101.8773815,0,0.85,2.8,252,,15,8.699999809,0.136008814,101.8041,0.932551742,9,0,239,2.400000095,0.980000019,,30
2016-10-31 19:00:00,0.132523268,9.800000191,0.969565272,9.100000381,101.657547,0,0.430000007,0.800000012,280,0.05,-70,0.112025261,10.39999962,0.971649647,9.199999809,101.6868591,0,0.680000007,1.399999976,275,,-35,0.12326242,9.699999809,0.986878932,9.100000381,101.7015152,0,0.579999983,1.600000024,250,0.05,0,0.195262039,8.5,0.976128919,9,101.8627259,0,0.87,2.2,242,0.2,15,8.699999809,0.137309894,101.7894516,0.949982584,9,0,223,2.400000095,1,0.2,30
2016-10-31 20:00:00,0.132523268,9.899999619,0.970960379,9.600000381,101.657547,0,0.660000026,1.100000024,293,,-70,0.111570932,10.39999962,0.981091261,9.699999809,101.7015152,0,1.100000024,1.600000024,284,,-35,0.122817382,9.699999809,0.987701058,9.600000381,101.6868591,0,0.779999971,2.099999905,287,,0,0.196794461,8.5,0.978222121,9.1,101.8187592,0,0.62,1.5,260,0.2,15,8.699999809,0.137742862,101.7601395,0.952251613,9.100000381,0,245,1.799999952,0.75,0.2,30
2016-10-31 21:00:00,0.132523268,9.899999619,0.96970582,10,101.657547,0,0.540000021,0.899999976,303,,-70,0.111570932,10.5,0.987520337,10.10000038,101.6868591,0,0.970000029,1.600000024,291,,-35,0.12326242,9.699999809,0.986003339,10,101.6868591,0,0.74000001,1.700000048,310,0.05,0,0.196028915,8.5,0.979330717,9.6,101.8041036,0,0.79,1.7,289,,15,8.699999809,0.137742862,101.7454834,0.962590039,9.600000381,0,272,2.099999905,1,,30
2016-10-31 22:00:00,0.132085949,9.899999619,0.974404633,10.30000019,101.6282349,0,0.730000019,1.100000024,287,,-70,0.11111623,10.5,0.983787537,10.39999962,101.6428909,0,1.080000043,1.600000024,279,,-35,0.12326242,9.800000191,0.990378499,10.30000019,101.6722031,0,0.850000024,1.899999976,277,,0,0.196028915,8.6,0.986003368,10,101.8041036,0,0.68,1.6,314,0.2,15,8.699999809,0.137742862,101.7747955,0.961557031,10,0,298,2.099999905,0.850000024,0.2,30
2016-10-31 23:00:00,0.132085949,10,0.974404633,10.30000019,101.5989227,0,0.529999971,1,282,,-70,0.11111623,10.5,0.985126615,10.5,101.6135788,0,0.769999981,1.299999952,275,,-35,0.122817382,9.800000191,0.983787537,10.39999962,101.6282349,0,0.600000024,1.600000024,266,,0,0.196411854,8.6,0.982391546,10.3,101.789448,0,0.82,2,277,,15,8.800000191,0.137742862,101.7454834,0.958430767,10.30000019,0,267,1.899999976,0.970000029,,30
2016-11-01 00:00:00,0.132085949,10,0.975853741,10.39999962,101.5549622,0,0.560000002,1.100000024,279,,-70,0.11111623,10.5,0.985126615,10.5,101.5696106,0,0.75,1.600000024,274,,-35,0.122817382,9.800000191,0.985126615,10.5,101.5696106,0,0.680000007,1.799999952,262,0.05,0,0.196411854,8.7,0.98378751,10.4,101.7601368,0,0.67,1.5,265,,15,8.899999619,0.137742862,101.7161713,0.95998621,10.39999962,0,250,1.399999976,0.699999988,,30
2016-11-01 01:00:00,0.132085949,10,0.975853741,10.39999962,101.52565,0,0.550000012,1.100000024,285,0.05,-70,0.11111623,10.5,0.985126615,10.5,101.5403061,0,0.889999986,1.700000048,277,0.05,-35,0.122817382,9.899999619,0.991721272,10.39999962,101.5403061,0,0.790000021,2.200000048,272,0.05,0,0.197176735,8.8,0.98378751,10.4,101.71617,0,0.78,1.9,263,0.2,15,8.899999619,0.137742862,101.6722031,0.961483598,10.5,0,248,2.5,0.829999983,0.2,30
2016-11-01 02:00:00,0.132085949,10,0.974404633,10.30000019,101.4670258,0,0.569999993,1.200000048,274,,-70,0.11111623,10.60000038,0.991721272,10.39999962,101.4816818,0,0.810000002,1.5,269,,-35,0.122817382,9.899999619,0.983787537,10.39999962,101.4816818,0,0.920000017,2.200000048,242,0.05,0,0.197558677,8.8,0.98378751,10.4,101.6868588,0,0.87,2,273,,15,9,0.137742862,101.6428909,0.967919946,10.39999962,0,259,2.900000095,1.00999999,,30
2016-11-01 03:00:00,0.132085949,10.10000038,0.97289747,10.19999981,101.4084015,0,0.600000024,3,274,0.05,-70,0.110661156,10.60000038,0.990378499,10.30000019,101.4230576,0,0.75999999,1.600000024,264,,-35,0.122817382,10,0.988978386,10.19999981,101.4230576,0,0.970000029,2.700000048,229,0.15,0,0.197558677,8.9,0.99037847,10.3,101.6282364,0,0.97,2.3,249,,15,9.100000381,0.137742862,101.5842667,0.95998621,10.39999962,0,235,2.299999952,1.029999971,0.2,30
2016-11-01 04:00:00,0.132085949,10.10000038,0.984426737,9.899999619,101.3497772,0,0.75999999,1.700000048,270,,-70,0.110205702,10.60000038,0.994152129,10,101.3644333,0,0.959999979,1.799999952,264,0.05,-35,0.122817382,10,0.986003339,10,101.3644333,0,1.289999962,3,234,,0,0.197558677,8.9,0.988978412,10.2,101.5549585,0,1.22,3,247,0.2,15,9.100000381,0.137742862,101.52565,0.964856982,10.19999981,0,231,2.900000095,1.320000052,,30
2016-11-01 05:00:00,0.131648242,10.19999981,0.979330719,9.600000381,101.2911606,0,0.699999988,1.5,267,,-70,0.109749876,10.69999981,0.989405632,9.699999809,101.3058167,0,0.870000005,1.600000024,263,,-35,0.122817382,10,0.996071398,9.600000381,101.3058167,0,1.309999943,3.299999952,229,0.05,0,0.197940288,9,0.992630321,9.9,101.5109917,0,1.52,3.5,246,,15,9.199999809,0.137742862,101.4816818,0.961557031,10,0,234,3.700000048,1.480000019,0.2,30
2016-11-01 06:00:00,0.132085949,10.19999981,0.980248332,9.199999809,101.2178802,0,0.529999971,1.100000024,246,,-70,0.109749876,10.69999981,0.990749359,9.300000191,101.2325363,0,0.620000005,1.5,250,,-35,0.122817382,10,0.988847017,9.199999809,101.2325363,0,1.190000057,4.099999905,216,,0,0.197940288,9,0.996071413,9.6,101.4670249,0,1.48,4,240,,15,9.199999809,0.137742862,101.4230576,0.964462638,9.699999809,0,228,5.400000095,1.669999957,,30
2016-11-01 08:00:00,0.132085949,10.19999981,0.98274231,8.899999619,101.1885681,0,0.629999995,1.200000048,256,,-70,0.109749876,10.69999981,0.993559778,9,101.2178802,0,0.74000001,1.5,253,,-35,0.122817382,10.10000038,0.991516769,8.899999619,101.2178802,1.831054688,1.409999967,4.400000095,215,,0,0.196028915,9,0.98274229,8.9,101.3644358,3.662109375,1.84,4.6,227,,15,9.300000191,0.137742862,101.3204727,0.965193331,8.899999619,3.662109375,210,5.400000095,2.24000001,,30
2016-11-01 09:00:00,0.132085949,10.19999981,0.978222132,9.100000381,101.1445999,3.662109375,0.460000008,0.899999976,238,,-70,0.109749876,10.80000019,0.995535791,9.100000381,101.159256,3.662109375,0.50999999,1,249,,-35,0.122817382,10.19999981,0.986878932,9.100000381,101.159256,14.6484375,0.930000007,2.599999905,218,,0,0.191794585,9,0.980248326,9.2,101.3058134,29.296875,1.49,4.2,223,,15,9.300000191,0.137309894,101.2471924,0.954452336,9.199999809,29.296875,205,4.099999905,1.850000024,,30
2016-11-01 10:00:00,0.132085949,10.19999981,0.975619674,9.399999619,101.0566711,12.81738281,0.50999999,1.100000024,239,,-70,0.109749876,10.80000019,0.994360745,9.5,101.1152878,12.81738281,0.579999983,1.299999952,245,,-35,0.122817382,10.19999981,0.985933959,9.5,101.1006317,34.79003906,1.330000043,3.5,214,,0,0.188689632,9.1,0.954219673,9.6,101.2325354,75.07324219,1.86,4.8,219,,15,9.300000191,0.136876568,101.159256,0.939519584,9.699999809,75.07324219,200,5.599999905,2.400000095,,30
2016-11-01 11:00:00,0.132523268,10.30000019,0.940735579,10.19999981,100.9540787,31.12792969,0.560000002,2.799999952,246,,-70,0.109749876,10.80000019,0.97289747,10.19999981,101.027359,32.95898438,0.680000007,1.899999976,252,,-35,0.122817382,10.19999981,0.936184883,10.39999962,101.027359,75.07324219,1.620000005,4,217,,0,0.19102036,9.3,0.906316487,10.5,101.1446019,155.6396484,2.38,6.3,227,,15,9.399999619,0.13644287,101.0713272,0.892465889,10.60000038,195.9228516,208,6.300000191,3.049999952,,30
2016-11-01 12:00:00,0.132085949,10.30000019,0.894317269,10.69999981,100.8514862,23.80371094,0.699999988,1.799999952,252,,-70,0.109749876,10.80000019,0.896109521,10.80000019,100.9540787,23.80371094,0.860000014,2,248,,-35,0.122817382,10.19999981,0.890169501,10.89999962,100.9394226,58.59375,1.919999957,4.800000191,212,,0,0.193339016,9.6,0.874821771,10.9,101.0566683,113.5253906,2.6,6.8,224,,15,9.699999809,0.136008814,101.0127029,0.853781343,11,113.5253906,206,7.099999905,3.200000048,,30
2016-11-01 13:00:00,0.132085949,10.30000019,0.912383556,10.39999962,100.7782135,10.98632813,0.540000021,1.399999976,248,0.1,-70,0.109293669,10.80000019,0.906316459,10.5,100.8661423,9.155273438,0.649999976,2,246,0.1,-35,0.122817382,10.30000019,0.908123136,10.60000038,100.8514862,27.46582031,1.269999981,4,210,0.15,0,0.196028915,9.8,0.892465868,10.6,100.9687347,53.10058594,1.85,5.3,224,0.6,15,10,0.137309894,100.9247665,0.870987296,10.69999981,54.93164063,206,5.699999809,2.210000038,0.6,30
2016-11-01 14:00:00,0.131648242,10.39999962,0.9352054,9.899999619,100.675621,3.662109375,0.5,0.899999976,207,0.45,-70,0.109293669,10.80000019,0.937110662,10,100.7489014,3.662109375,0.460000008,1,203,0.4,-35,0.122371979,10.30000019,0.937110662,10,100.7489014,12.81738281,0.629999995,2.799999952,184,0.5,0,0.194878101,9.9,0.922764882,10.1,100.8661456,25.63476563,1.38,3.7,212,2.2,15,10.10000038,0.138175473,100.8075256,0.898481607,10.10000038,27.46582031,190,4.599999905,2.089999914,2.6,30
2016-11-01 15:00:00,0.131648242,10.39999962,0.943408966,9.899999619,100.6169968,3.662109375,0.540000021,1.399999976,209,0.2,-70,0.10883709,10.89999962,0.953408241,10,100.675621,3.662109375,0.529999971,1.299999952,218,0.2,-35,0.122817382,10.39999962,0.953408241,10,100.6902771,16.47949219,0.959999979,3.400000095,196,0.25,0,0.194878101,9.9,0.930859311,10.1,100.7928676,31.12792969,1.81,3.8,218,1,15,10.10000038,0.138175473,100.7342453,0.914670467,10.10000038,31.12792969,197,6.199999809,2.700000048,1,30
2016-11-01 16:00:00,0.131648242,10.5,0.947833955,9.699999809,100.5437241,0,0.529999971,1.200000048,214,0.05,-70,0.10883709,10.89999962,0.958013475,9.800000191,100.5876923,0,0.579999983,1.399999976,221,,-35,0.122817382,10.39999962,0.949754715,9.800000191,100.6023483,5.493164063,1.019999981,2.799999952,200,,0,0.198321566,9.9,0.941495995,9.8,100.704934,10.98632813,1.97,5.2,217,0.2,15,10.10000038,0.137742862,100.6463089,0.910594761,9.899999619,12.81738281,198,6.199999809,2.869999886,0.2,30
2016-11-01 17:00:00,0.131648242,10.5,0.952226758,9.5,100.4850998,0,0.579999983,1.100000024,259,0.05,-70,0.108380139,10.89999962,0.962590039,9.600000381,100.529068,0,0.800000012,1.600000024,253,0.05,-35,0.122817382,10.5,0.956148267,9.699999809,100.5437241,0,1.379999995,3.799999952,213,0.1,0,0.198321566,9.8,0.939519613,9.7,100.6463117,0,1.87,4.7,229,0.4,15,10,0.137742862,100.5876923,0.922890961,9.699999809,0,213,5.5,2.160000086,0.4,30
2016-11-01 18:00:00,0.131648242,10.5,0.945849299,9.600000381,100.4264755,0,0.670000017,1.200000048,268,,-70,0.108380139,10.89999962,0.956148267,9.699999809,100.4850998,0,0.899999976,2.099999905,259,,-35,0.122817382,10.5,0.956148267,9.699999809,100.4997559,0,1.379999995,3.700000048,225,,0,0.199463415,9.7,0.939519613,9.7,100.5876893,0,1.48,3.5,238,,15,9.899999619,0.138175473,100.5437241,0.916719794,9.800000191,0,225,4.199999809,1.74000001,,30
2016-11-01 19:00:00,0.131210178,10.5,0.954219699,9.600000381,100.3971634,0,0.75,1.5,272,,-70,0.108380139,10.89999962,0.956148267,9.699999809,100.4557877,0,1.049999952,2.299999952,265,,-35,0.122817382,10.5,0.956148267,9.699999809,100.4704437,0,1.409999967,3.799999952,231,,0,0.196411854,9.7,0.947833946,9.7,100.5583781,0,1.67,4.3,246,,15,9.899999619,0.138607711,100.5144119,0.931205273,9.699999809,0,232,4.099999905,1.830000043,,30
2016-11-01 20:00:00,0.131210178,10.5,0.962590039,9.600000381,100.3385468,0,0.790000021,1.5,283,0.25,-70,0.107922807,10.89999962,0.972776949,9.699999809,100.3971634,0,1.24000001,2.599999905,274,0.2,-35,0.12326242,10.5,0.972776949,9.699999809,100.4118195,0,1.330000043,3.900000095,255,0.35,0,0.197558677,9.6,0.964462612,9.7,100.5144113,0,1.38,4,262,1.2,15,9.800000191,0.139039591,100.4704437,0.947833955,9.699999809,0,246,4.5,1.629999995,1.6,30
2016-11-01 21:00:00,0.131648242,10.5,0.930962801,9.300000191,100.3238907,0,1.620000005,3.299999952,316,0.2,-70,0.107922807,10.89999962,0.933201432,9.399999619,100.3971634,0,2.940000057,5.599999905,299,0.15,-35,0.12326242,10.5,0.935373187,9.5,100.4118195,0,3.400000095,8.300000191,327,0.4,0,0.196028915,9.6,0.924717797,9.4,100.5290669,0,3.09,7.9,336,1.4,15,9.800000191,0.139471114,100.4704437,0.901666045,9.5,0,319,9,3.730000019,1.4,30
2016-11-01 22:00:00,0.131648242,10.5,0.920241833,7.900000095,100.3385468,0,1.159999967,2.099999905,303,0.05,-70,0.107922807,10.89999962,0.917067528,8.100000381,100.4411316,0,2.220000029,3.5,295,0.05,-35,0.124151386,10.5,0.910856545,8.199999809,100.4118195,0,2.230000019,4.199999809,314,0.1,0,0.198702513,9.6,0.907804216,8.1,100.5583781,0,2.09,4.5,323,0.6,15,9.800000191,0.139902279,100.4850998,0.883254826,8.199999809,0,307,5.699999809,2.5,0.6,30
2016-11-01 23:00:00,0.131210178,10.5,0.929672778,7.599999905,100.3238907,0,0.99000001,1.600000024,285,0.05,-70,0.107922807,10.89999962,0.932870269,7.699999809,100.4118195,0,1.970000029,3.299999952,280,0.05,-35,0.1259249,10.5,0.932870269,7.699999809,100.3825073,0,1.789999962,3.599999905,281,,0,0.204377091,9.4,0.923351186,7.7,100.5290669,0,1.73,3.7,288,0.2,15,9.600000381,0.140333071,100.4557877,0.888714373,7.800000191,0,276,4.099999905,2.25999999,0.2,30
2016-11-02 00:00:00,0.131210178,10.5,0.932745576,7.400000095,100.2799225,0,1,1.399999976,280,,-70,0.107922807,10.89999962,0.936042845,7.5,100.3678589,0,1.75999999,3.200000048,277,,-35,0.129014403,10.39999962,0.945692778,7.5,100.3678589,0,1.639999986,3.900000095,270,,0,0.208119083,9.2,0.926392907,7.5,100.4997557,0,1.66,3.9,280,,15,9.5,0.140763521,100.4264755,0.900920033,7.599999905,0,265,5,1.950000048,,30
2016-11-02 01:00:00,0.131210178,10.5,0.935084343,6.900000095,100.2506104,0,1.639999986,2.599999905,286,,-70,0.107922807,10.89999962,0.932262361,7.099999905,100.3238907,0,2.329999924,3.599999905,280,,-35,0.132523268,10.39999962,0.938676,7,100.3385468,0,2.079999924,4.400000095,278,,0,0.203624762,9.1,0.928690078,7,100.455789,0,2.08,5.5,285,,15,9.300000191,0.141623303,100.3678589,0.902509272,7.099999905,0,272,5.099999905,2.569999933,,30
2016-11-02 02:00:00,0.131210178,10.5,0.922106206,6.300000191,100.2212982,0,1.690000057,2.5,293,,-70,0.107922807,10.89999962,0.919817746,6.5,100.3092346,0,2.579999924,4.699999809,280,,-35,0.134268954,10.30000019,0.930152774,6.5,100.2945786,0,2.25,5.099999905,277,,0,0.198702513,8.8,0.915770159,6.4,100.4264778,0,2.37,5.2,285,,15,9.100000381,0.142052665,100.3532028,0.888812661,6.5,0,271,6.599999905,2.900000095,,30
2016-11-02 03:00:00,0.131210178,10.5,0.920014322,6,100.1919861,0,1.629999995,2.5,291,,-70,0.107922807,10.89999962,0.924301565,6.099999905,100.2799225,0,2.369999886,4.300000191,278,,-35,0.136008814,10.30000019,0.924301565,6.099999905,100.2652664,0,2.180000067,6.199999809,272,,0,0.197940288,8.5,0.92001435,6,100.3971666,0,2.28,5.3,282,,15,8.800000191,0.142052665,100.3385468,0.892429054,6.099999905,0,270,6.400000095,2.660000086,,30
2016-11-02 04:00:00,0.131648242,10.39999962,0.930294812,5.5,100.162674,0,1,2,279,,-70,0.108380139,10.89999962,0.934859455,5.599999905,100.2212982,0,1.149999976,2.599999905,271,,-35,0.136876568,10.19999981,0.945857763,5.599999905,100.2066422,0,1.289999962,3.200000048,239,,0,0.198321566,8.2,0.930294798,5.5,100.3531998,0,1.49,4.4,253,,15,8.5,0.142481655,100.2799225,0.908144951,5.5,0,235,5.199999809,1.590000033,,30
2016-11-02 05:00:00,0.131648242,10.39999962,0.956534743,5.099999905,100.1333694,0,1.00999999,1.799999952,271,,-70,0.108380139,10.89999962,0.961206436,5.199999809,100.162674,0,1.110000014,1.899999976,263,,-35,0.137309894,10.10000038,0.961206436,5.199999809,100.162674,0,1.75999999,4.599999905,219,,0,0.198702513,7.9,0.949898107,5.2,100.309233,0,1.83,4.9,240,,15,8.199999809,0.142481655,100.2359543,0.927281499,5.199999809,0,223,5.099999905,1.950000048,,30
2016-11-02 06:00:00,0.131648242,10.30000019,0.949898124,5.199999809,100.0747452,0,1.080000043,1.899999976,268,,-70,0.10883709,10.80000019,0.954542816,5.300000191,100.1333694,0,1.190000057,2.900000095,261,,-35,0.138175473,10,0.965772688,5.300000191,100.1187134,0,2.170000076,5.199999809,219,,0,0.19908313,7.6,0.949898107,5.2,100.2652662,0,2.33,6.1,233,,15,7.900000095,0.142481655,100.17733,0.927281499,5.199999809,0,215,6.099999905,2.50999999,,30
2016-11-02 07:00:00,0.131648242,10.30000019,0.954542816,5.300000191,100.030777,0,1.309999943,2.200000048,274,,-70,0.109293669,10.80000019,0.959082842,5.400000095,100.1040573,0,1.470000029,3.299999952,263,,-35,0.138607711,9.899999619,0.959082842,5.400000095,100.0894012,0,2.230000019,5.800000191,223,,0,0.199843369,7.4,0.947930706,5.4,100.2212995,0,2.38,5.8,245,,15,7.699999809,0.142481655,100.1333694,0.925626457,5.400000095,0,229,5.800000191,2.670000076,,30
2016-11-02 08:00:00,0.131210178,10.19999981,0.941369712,5.5,100.0014648,0,1.450000048,2.599999905,276,,-70,0.109293669,10.69999981,0.945857763,5.599999905,100.0894012,0,1.75,4.099999905,266,,-35,0.139039591,9.800000191,0.945857763,5.599999905,100.0747452,3.662109375,2.589999914,6.400000095,233,,0,0.201359882,7.3,0.934859443,5.6,100.2066439,7.32421875,2.69,7.1,248,,15,7.599999905,0.142481655,100.1187134,0.912862778,5.599999905,7.32421875,232,7,2.75,,30
2016-11-02 09:00:00,0.131210178,10.19999981,0.913677394,6.099999905,99.98680878,5.493164063,1.980000019,3.599999905,285,,-70,0.109749876,10.69999981,0.907389164,6.199999809,100.0747452,5.493164063,2.529999971,5.800000191,272,,-35,0.139039591,9.699999809,0.917940199,6.199999809,100.0747452,18.31054688,2.930000067,6.699999809,249,,0,0.202871118,7.3,0.896838114,6.2,100.1919883,36.62109375,3.16,8.2,263,,15,7.599999905,0.142481655,100.1333694,0.886287093,6.199999809,38.45214844,250,10.5,3.579999924,,30
2016-11-02 10:00:00,0.131648242,10.10000038,0.88455075,6.400000095,99.95749664,9.155273438,2.519999981,4.199999809,287,,-70,0.109749876,10.69999981,0.872451127,6.599999905,100.0747452,9.155273438,3.269999981,6.699999809,272,,-35,0.139471114,9.699999809,0.892979383,6.599999905,100.0600891,29.296875,3.50999999,7.699999809,256,,0,0.204752763,7.4,0.872451123,6.6,100.1919883,49.43847656,3.61,9,271,0.2,15,7.699999809,0.142052665,100.1480179,0.846083224,6.699999809,53.10058594,259,10.10000038,4.090000153,,30
2016-11-02 11:00:00,0.131648242,10.10000038,0.860536158,6.800000191,99.95749664,10.98632813,2.519999981,6.199999809,290,,-70,0.109749876,10.60000038,0.848802745,7,100.0747452,10.98632813,3.400000095,8.199999809,273,,-35,0.139471114,9.600000381,0.868774593,7,100.0600891,32.95898438,3.119999886,9.300000191,255,,0,0.205877814,7.6,0.84880276,7,100.1773327,58.59375,3.67,9,271,,15,7.800000191,0.141623303,100.1480179,0.828830957,7,62.25585938,258,9.100000381,4.039999962,0.2,30
2016-11-02 12:00:00,0.131648242,10.10000038,0.844592273,6.900000095,99.95749664,10.98632813,2.920000076,5.400000095,294,,-70,0.109749876,10.60000038,0.833085477,7.099999905,100.0600891,9.155273438,4.03000021,8.800000191,276,,-35,0.139902279,9.600000381,0.843003213,7.099999905,100.045433,31.12792969,3.940000057,11.80000019,271,,0,0.206626211,7.8,0.823167816,7.1,100.1626771,53.10058594,4.18,11.9,280,,15,7.900000095,0.141193599,100.1480179,0.797847986,7.199999809,54.93164063,267,10.60000038,4.920000076,,30
2016-11-02 13:00:00,0.131648242,10,0.81197089,7.300000191,99.91352844,20.14160156,3.170000076,5.699999809,294,,-70,0.109749876,10.60000038,0.8064363,7.400000095,100.0161209,20.14160156,4.460000038,8.5,276,,-35,0.139902279,9.600000381,0.810593784,7.5,100.0014648,54.93164063,4.269999981,10,271,,0,0.206999919,7.8,0.791293941,7.5,100.1187103,89.72167969,4.53,9.8,282,,15,8,0.141193599,100.1187134,0.771994114,7.5,95.21484375,270,11.80000019,5.309999943,,30
2016-11-02 14:00:00,0.131648242,10,0.795493245,7.599999905,99.8549118,14.6484375,3.50999999,7.699999809,295,,-70,0.109749876,10.5,0.775261462,7.800000191,99.97215271,14.6484375,4.730000019,8.100000381,278,,-35,0.140333071,9.600000381,0.784715891,7.800000191,99.97215271,45.77636719,4.369999886,10.69999981,272,,0,0.206626211,8,0.775261467,7.8,100.0747435,75.07324219,4.66,10.9,283,,15,8.100000381,0.141193599,100.0894012,0.756352663,7.800000191,78.73535156,270,13.89999962,5.449999809,,30
2016-11-02 15:00:00,0.131648242,10,0.780564904,7.699999809,99.8549118,14.6484375,3.299999952,5.599999905,295,,-70,0.109749876,10.5,0.765807033,7.800000191,99.97215271,14.6484375,4.510000229,8.699999809,279,,-35,0.140333071,9.600000381,0.784715891,7.800000191,99.95749664,51.26953125,4.170000076,10.19999981,277,,0,0.205877814,8,0.765807059,7.8,100.0600879,75.07324219,4.47,11.7,286,,15,8.199999809,0.141193599,100.0894012,0.741827607,7.900000095,76.90429688,273,10.89999962,5.179999828,,30
2016-11-02 16:00:00,0.131210178,10,0.823167801,7.099999905,99.86956787,3.662109375,3.069999933,5.699999809,297,,-70,0.109749876,10.5,0.802188098,7.300000191,99.97215271,5.493164063,4.420000076,8.5,280,,-35,0.140333071,9.600000381,0.81197089,7.300000191,99.97215271,20.14160156,4.079999924,9.199999809,278,0.15,0,0.206626211,8.1,0.802188079,7.3,100.0893991,31.12792969,4.29,11.4,287,0.4,15,8.199999809,0.142910302,100.0747452,0.782622516,7.300000191,32.95898438,275,11.69999981,5.119999886,0.4,30
2016-11-02 17:00:00,0.130771756,10,0.883732796,4.800000191,99.97215271,0,2.269999981,5,320,0.1,-70,0.109749876,10.5,0.882954538,5,100.045433,0,3.079999924,5.800000191,301,0.1,-35,0.140333071,9.600000381,0.889133513,4.900000095,100.045433,1.831054688,3.890000105,10.69999981,330,0.35,0,0.201738185,8,0.877586349,4.9,100.1626771,5.493164063,3.54,9.5,341,1.4,15,8.199999809,0.143766493,100.1333694,0.854491949,4.900000095,5.493164063,324,9.600000381,3.980000019,1.8,30
2016-11-02 18:00:00,0.130771756,10,0.927236855,4.300000191,100.030777,0,1.639999986,2.799999952,303,0.1,-70,0.109749876,10.5,0.932719588,4.400000095,100.0747452,0,2.75999999,4.599999905,286,0.1,-35,0.140333071,9.600000381,0.926211357,4.5,100.0894012,0,2.359999895,5.400000095,294,0.2,0,0.203624762,7.8,0.920761621,4.4,100.2212995,0,2.34,6,303,0.8,15,8,0.144621253,100.162674,0.890587807,4.5,0,291,5.300000191,2.75,0.8,30
2016-11-02 19:00:00,0.130332962,10,0.927236855,4.300000191,100.0747452,0,1.49000001,2.400000095,298,0.05,-70,0.109749876,10.5,0.920761645,4.400000095,100.1187134,0,2.50999999,4.5,282,,-35,0.141193599,9.600000381,0.932719588,4.400000095,100.1333694,0,2,4.199999809,284,,0,0.212197622,7.6,0.908803677,4.4,100.2506106,0,2.02,4.6,291,0.2,15,7.800000191,0.145048082,100.2066422,0.884887815,4.400000095,0,279,5.099999905,2.279999971,0.2,30
2016-11-02 20:00:00,0.130332962,9.899999619,0.934671223,4,100.1187134,0,1.679999948,3.099999905,297,,-70,0.110205702,10.5,0.928128123,4.099999905,100.162674,0,2.769999981,4.599999905,281,,-35,0.142052665,9.5,0.94034034,4.099999905,100.17733,0,2.25999999,5.5,283,,0,0.210348614,7.3,0.915915923,4.1,100.2945774,0,2.26,6,292,,15,7.599999905,0.145474568,100.2652664,0.90370369,4.099999905,0,281,6.300000191,2.559999943,,30
2016-11-02 21:00:00,0.130332962,9.899999619,0.916929364,3.700000048,100.1919861,0,1.590000033,2.700000048,307,,-70,0.110205702,10.39999962,0.90411061,3.900000095,100.2652664,0,2.74000001,4.199999809,289,,-35,0.142481655,9.399999619,0.916495681,3.900000095,100.2506104,0,2.460000038,5.199999809,302,,0,0.201359882,7.1,0.904110584,3.9,100.3678554,0,2.3,5.3,311,,15,7.400000095,0.145474568,100.3385468,0.87934041,3.900000095,0,296,5.699999809,2.809999943,,30
2016-11-02 22:00:00,0.130332962,9.800000191,0.910880983,3.400000095,100.2652664,0,1.799999952,3.099999905,308,,-70,0.110661156,10.39999962,0.898115695,3.599999905,100.3385468,0,3,5.900000095,288,,-35,0.143338576,9.399999619,0.917212248,3.5,100.3385468,0,2.75,5.800000191,302,,0,0.200222992,6.8,0.904473194,3.5,100.4704446,0,2.74,6,311,,15,7.099999905,0.145474568,100.4118195,0.878995061,3.5,0,295,6.300000191,3.210000038,,30
2016-11-02 23:00:00,0.130771756,9.800000191,0.916735649,2.700000048,100.3238907,0,1.74000001,3.099999905,300,,-70,0.110661156,10.30000019,0.91024971,2.799999952,100.3825073,0,2.75,4.599999905,283,,-35,0.143766493,9.300000191,0.923635781,2.799999952,100.4118195,0,2.109999895,4.800000191,290,,0,0.201738185,6.6,0.910249736,2.8,100.5144113,0,2.13,5.7,298,,15,6.900000095,0.145048082,100.4704437,0.883477688,2.799999952,0,283,5.5,2.430000067,,30
2016-11-03 00:00:00,0.131210178,9.699999809,0.922732711,2.400000095,100.3971634,0,1.690000057,2.700000048,299,,-70,0.11111623,10.30000019,0.9161883,2.5,100.4557877,0,2.710000038,3.900000095,281,,-35,0.143766493,9.199999809,0.929862738,2.5,100.4850998,0,2.140000105,4.5,285,,0,0.202493803,6.3,0.922732682,2.4,100.5876893,0,2.17,4.6,295,,15,6.599999905,0.145048082,100.529068,0.888839364,2.5,0,282,5.199999809,2.430000067,,30
2016-11-03 01:00:00,0.131210178,9.699999809,0.922732711,2.400000095,100.4557877,0,1.649999976,2.599999905,305,,-70,0.11111623,10.30000019,0.923273146,2.599999905,100.529068,0,2.730000019,4.300000191,286,,-35,0.143766493,9.100000381,0.929862738,2.5,100.5437241,0,2.289999962,4.5,299,,0,0.203624762,6,0.916188289,2.5,100.6609673,0,2.15,4.8,307,,15,6.400000095,0.145048082,100.5876923,0.888839364,2.5,0,292,4.900000095,2.549999952,,30
2016-11-03 02:00:00,0.131210178,9.600000381,0.929329276,2.299999952,100.5144119,0,1.610000014,3.299999952,308,,-70,0.11111623,10.19999981,0.922732711,2.400000095,100.6169968,0,2.630000114,4.400000095,289,,-35,0.143766493,9,0.936504841,2.400000095,100.6023483,0,2.319999933,5.800000191,302,,0,0.20400109,5.8,0.908960553,2.4,100.704934,0,2.22,5.2,310,,15,6.099999905,0.144621253,100.6463089,0.895188451,2.400000095,0,294,6.199999809,2.640000105,,30
2016-11-03 03:00:00,0.131648242,9.5,0.929329276,2.299999952,100.5437241,0,1.809999943,3,303,,-70,0.11111623,10.19999981,0.9161883,2.5,100.660965,0,3.00999999,4.900000095,283,,-35,0.143766493,8.899999619,0.936504841,2.400000095,100.6463089,0,2.519999981,5.199999809,291,,0,0.204752763,5.6,0.908960553,2.4,100.7489008,0,2.4,5.3,299,,15,5.900000095,0.144621253,100.6902771,0.895188451,2.400000095,0,286,7.099999905,2.799999952,,30
2016-11-03 04:00:00,0.131648242,9.5,0.928610921,2.099999905,100.6316528,0,1.779999971,3.400000095,308,,-70,0.11111623,10.10000038,0.922008634,2.200000048,100.7049332,0,2.930000067,4.699999809,289,,-35,0.143766493,8.800000191,0.935978472,2.200000048,100.7049332,0,2.630000114,4.599999905,301,,0,0.205128108,5.4,0.922008654,2.2,100.8075232,0,2.43,4.5,310,,15,5.800000191,0.144194052,100.7635574,0.894069016,2.200000048,0,294,5.300000191,2.99000001,,30
2016-11-03 05:00:00,0.131648242,9.399999619,0.926596344,1.700000048,100.6902771,0,1.580000043,2.799999952,303,,-70,0.11111623,10,0.934361517,1.799999952,100.7782135,0,2.579999924,5.199999809,284,,-35,0.143766493,8.800000191,0.941074371,1.700000048,100.7782135,0,2.099999905,5.5,293,,0,0.205503125,5.3,0.926596333,1.7,100.8808012,0,2.07,6.9,302,,15,5.599999905,0.144194052,100.8221817,0.897640169,1.700000048,0,288,8.100000381,2.349999905,,30
2016-11-03 06:00:00,0.131648242,9.399999619,0.945441782,1.200000048,100.7635574,0,1.370000005,2.200000048,297,,-70,0.11111623,10,0.953569472,1.299999952,100.8221817,0,2.220000029,3.400000095,281,,-35,0.143766493,8.699999809,0.960448742,1.200000048,100.8368378,0,1.659999967,3.5,284,,0,0.205503125,5.1,0.945441756,1.2,100.9540791,0,1.62,3.4,291,,15,5.400000095,0.144194052,100.8807983,0.923770428,1.299999952,0,278,3.700000048,1.950000048,,30
2016-11-03 07:00:00,0.131648242,9.300000191,0.957633257,0.800000012,100.8221817,0,1.350000024,2.099999905,296,,-70,0.11111623,9.899999619,0.95914942,1,100.8954544,0,2.150000095,4,279,,-35,0.143766493,8.600000381,0.966086209,0.899999976,100.8954544,0,1.679999948,3.900000095,281,,0,0.205877814,4.9,0.957633278,0.8,100.9980459,0,1.63,4.3,288,,15,5.199999809,0.144194052,100.9394226,0.935416818,0.899999976,0,275,4.900000095,1.919999957,,30
2016-11-03 08:00:00,0.131648242,9.199999809,0.957633257,0.800000012,100.8954544,0,1.440000057,2.400000095,296,,-70,0.11111623,9.899999619,0.950751483,0.899999976,100.9687347,0,2.369999886,4.5,280,,-35,0.144194052,8.5,0.973078966,0.800000012,100.9540787,3.662109375,1.909999967,4,281,,0,0.205877814,4.7,0.957633278,0.8,101.0859795,7.32421875,1.89,4.2,289,,15,5.099999905,0.144194052,101.027359,0.926741898,0.800000012,9.155273438,274,5.199999809,2.230000019,,30
2016-11-03 09:00:00,0.131648242,9.199999809,0.952268064,1.100000024,100.9687347,3.662109375,1.169999957,2.099999905,298,,-70,0.11111623,9.899999619,0.960448742,1.200000048,101.0420151,3.662109375,1.99000001,3.5,282,,-35,0.144194052,8.399999619,0.960448742,1.200000048,101.027359,10.98632813,1.710000038,4,288,,0,0.205877814,4.6,0.945441756,1.2,101.1446019,21.97265625,1.63,3.8,295,,15,4.900000095,0.143766493,101.0859833,0.930434763,1.200000048,31.12792969,281,4.300000191,1.980000019,,30
2016-11-03 10:00:00,0.131648242,9.100000381,0.895188451,2.400000095,101.027359,9.155273438,1.539999962,2.900000095,304,,-70,0.11111623,9.800000191,0.896118104,2.599999905,101.1152878,9.155273438,2.569999933,5.199999809,286,,-35,0.144194052,8.399999619,0.903254271,2.700000048,101.1006317,14.6484375,2.369999886,5.199999809,303,,0,0.206252176,4.4,0.876291436,2.7,101.2178798,23.80371094,2.26,5.4,307,,15,4.800000191,0.143338576,101.1885681,0.856705606,2.799999952,31.12792969,292,6.300000191,2.779999971,,30
2016-11-03 11:00:00,0.131648242,9,0.835659623,3.799999952,101.0859833,21.97265625,1.850000024,3.400000095,304,,-70,0.11111623,9.800000191,0.823986471,4,101.1885681,21.97265625,2.960000038,4.699999809,285,,-35,0.143766493,8.300000191,0.830430448,4.099999905,101.173912,23.80371094,2.819999933,5.400000095,294,,0,0.206999919,4.4,0.812495023,4.2,101.2765022,31.12792969,2.68,5.1,304,,15,4.800000191,0.142910302,101.2618484,0.783717275,4.5,272.8271484,289,5.900000095,3.24000001,,30
2016-11-03 12:00:00,0.131648242,9,0.779080212,4.800000191,101.1006317,34.79003906,1.809999943,3.099999905,304,,-70,0.11111623,9.699999809,0.768285155,5,101.2032242,29.296875,2.730000019,4.699999809,290,,-35,0.143766493,8.199999809,0.774337649,5.099999905,101.1885681,38.45214844,2.75,5.599999905,301,,0,0.207746355,4.5,0.76363423,5.3,101.3058134,97.04589844,2.66,5.4,307,,15,5,0.143338576,101.2765045,0.736889184,5.599999905,404.6630859,291,6.099999905,3.220000029,,30
2016-11-03 13:00:00,0.131648242,8.899999619,0.723731875,5.199999809,101.0859833,20.14160156,2.059999943,3.299999952,295,,-70,0.11111623,9.699999809,0.708796024,5.5,101.173912,20.14160156,2.960000038,6.099999905,279,,-35,0.143766493,8.199999809,0.703894198,5.599999905,101.1885681,43.9453125,2.829999924,5.5,277,,0,0.208119083,4.7,0.684661842,6,101.3058134,318.6035156,3.04,6.9,286,,15,5.699999809,0.143338576,101.2765045,0.678642213,5.900000095,379.0283203,274,6.699999809,3.5,,30
2016-11-03 14:00:00,0.131210178,8.899999619,0.670899153,5.599999905,101.0859833,18.31054688,2.029999971,3.799999952,298,,-70,0.11111623,9.600000381,0.646325886,5.900000095,101.173912,16.47949219,3,5.199999809,281,,-35,0.143766493,8.199999809,0.637449324,6.099999905,101.159256,80.56640625,2.859999895,5.599999905,284,,0,0.208491486,5.2,0.620101868,6.5,101.3058134,269.1650391,2.97,6.6,293,,15,6.199999809,0.143338576,101.2911606,0.624388754,6.400000095,316.7724609,281,7.300000191,3.430000067,,30
2016-11-03 15:00:00,0.131210178,8.899999619,0.648902416,5.599999905,101.1006317,12.81738281,1.730000019,3.299999952,312,,-70,0.110661156,9.600000381,0.624781728,5.900000095,101.1885681,14.6484375,2.470000029,4.300000191,293,,-35,0.143766493,8.199999809,0.605576873,6.099999905,101.173912,148.3154297,2.450000048,5.5,310,,0,0.208491486,5.7,0.597273323,6.3,101.3058134,150.1464844,2.3,5.1,316,,15,6.599999905,0.143338576,101.3058167,0.59727335,6.300000191,172.1191406,303,5.800000191,2.75999999,,30
2016-11-03 16:00:00,0.131210178,8.899999619,0.678498626,5.199999809,101.1152878,5.493164063,1.110000014,2.5,287,,-70,0.110661156,9.600000381,0.662564993,5.300000191,101.2178802,7.32421875,1.440000057,3.200000048,275,,-35,0.143766493,8.199999809,0.648902416,5.599999905,101.2032242,65.91796875,1.190000057,3.099999905,267,,0,0.208119083,5.9,0.648902437,5.6,101.320469,60.42480469,1.29,3.5,275,,15,6.699999809,0.146751866,101.3204727,0.653421342,5.5,67.74902344,262,4,1.450000048,,30
2016-11-03 17:00:00,0.131210178,8.899999619,0.79541719,3.400000095,101.1445999,0,0.519999981,1,149,,-70,0.110205702,9.600000381,0.771620512,3.599999905,101.2471924,0,0.409999996,0.899999976,120,,-35,0.143766493,8.199999809,0.771620512,3.599999905,101.2325363,0,0.449999988,1.200000048,126,,0,0.207746355,5.8,0.764343544,3.5,101.3497802,0,0.6,1.3,152,,15,6.599999905,0.148449913,101.3204727,0.751604497,3.5,1.831054688,127,1.5,0.870000005,,30
2016-11-03 18:00:00,0.131210178,8.899999619,0.862487555,1.799999952,101.1445999,0,0.689999998,1,132,,-70,0.110205702,9.600000381,0.870612621,1.899999976,101.2618484,0,0.449999988,0.800000012,104,,-35,0.143766493,8.199999809,0.876862347,1.799999952,101.2325363,0,0.529999971,0.800000012,110,,0,0.207746355,5.6,0.862487543,1.8,101.3497802,0,0.61,0.9,135,,15,6.300000191,0.148449913,101.3058167,0.833737969,1.799999952,0,113,1.299999952,0.910000026,,30
2016-11-03 19:00:00,0.131648242,8.899999619,0.898251057,1,101.1445999,0,0.790000021,1.200000048,140,,-70,0.110205702,9.600000381,0.891806602,1.100000024,101.2325363,0,0.579999983,1.100000024,111,,-35,0.143766493,8.199999809,0.898251057,1,101.2325363,0,0.519999981,0.899999976,112,,0,0.2073733,5.3,0.883026439,1,101.3497802,0,0.55,1,135,,15,6,0.148449913,101.2911606,0.867801845,1,0,118,1.299999952,0.769999981,,30
2016-11-03 20:00:00,0.131648242,8.899999619,0.908882499,0.600000024,101.1445999,0,0.839999974,1.299999952,139,,-70,0.110205702,9.600000381,0.91789782,0.699999988,101.2032242,0,0.620000005,1,111,,-35,0.143766493,8.199999809,0.924552858,0.600000024,101.2032242,0,0.540000021,0.899999976,112,,0,0.2073733,5,0.9154776,0.5,101.3497802,0,0.51,1,137,,15,5.699999809,0.148449913,101.2618484,0.89321208,0.600000024,0,117,1.299999952,0.75,,30
2016-11-03 21:00:00,0.131648242,8.800000191,0.938024819,0.400000006,101.1445999,0,0.920000017,1.399999976,141,,-70,0.110205702,9.5,0.931261718,0.5,101.2032242,0,0.680000007,1.100000024,114,,-35,0.143766493,8.199999809,0.938024819,0.400000006,101.2032242,0,0.660000026,1.100000024,114,,0,0.206999919,4.7,0.92882847,0.3,101.3497802,0,0.63,1.2,138,,15,5.300000191,0.14802593,101.2471924,0.9128142,0.300000012,0,122,1.5,0.839999974,,30
2016-11-03 22:00:00,0.131648242,8.800000191,0.944842756,0.300000012,101.1299438,0,0.970000029,1.5,145,,-70,0.110205702,9.5,0.938024819,0.400000006,101.1885681,0,0.779999971,1.200000048,116,,-35,0.143766493,8.100000381,0.960857034,0.300000012,101.1885681,0,0.720000029,1.200000048,115,,0,0.206626211,4.4,0.951715945,0.2,101.3497802,0,0.66,1.4,138,,15,5,0.14802593,101.2471924,0.919454396,0.200000003,0,128,1.799999952,0.810000002,,30
2016-11-03 23:00:00,0.131648242,8.699999809,0.9423967,0.100000001,101.1006317,0,1.019999981,1.5,150,,-70,0.110205702,9.399999619,0.951715946,0.200000003,101.1445999,0,0.800000012,1.399999976,121,,-35,0.143338576,8,0.958644927,0.100000001,101.159256,0,0.75,1.200000048,120,,0,0.206626211,4.2,0.942396681,0.1,101.3058134,0,0.68,1.4,145,,15,4.800000191,0.147601604,101.2032242,0.926148474,0.100000001,0,136,1.799999952,0.819999993,,30
2016-11-04 00:00:00,0.131648242,8.699999809,0.924552858,0.600000024,101.0566711,0,1.129999995,1.700000048,159,,-70,0.110205702,9.399999619,0.940223277,0.600000024,101.1299438,0,0.689999998,1.200000048,133,,-35,0.143338576,7.900000095,0.940223277,0.600000024,101.1299438,0,0.709999979,1.200000048,130,,0,0.206626211,4.1,0.947045793,0.5,101.247191,0,0.67,1.2,160,,15,4.699999809,0.147176906,101.173912,0.908882499,0.600000024,0,152,2,0.850000024,,30
2016-11-04 01:00:00,0.131648242,8.600000381,0.91789782,0.699999988,100.9980469,0,1.110000014,1.600000024,154,,-70,0.110205702,9.399999619,0.926741898,0.800000012,101.0859833,0,0.769999981,1.399999976,128,,-35,0.143338576,7.800000191,0.933455467,0.699999988,101.0859833,0,0.769999981,1.399999976,125,,0,0.206626211,4.1,0.924552861,0.6,101.1885686,0,0.68,1.5,156,,15,4.599999905,0.147176906,101.1299438,0.902340233,0.699999988,0,148,2.200000048,0.889999986,,30
2016-11-04 02:00:00,0.131648242,8.5,0.920082092,0.899999976,100.9394226,0,1.179999948,1.899999976,159,,-70,0.110205702,9.300000191,0.928700209,1,101.027359,0,0.699999988,1.299999952,134,,-35,0.143338576,7.800000191,0.935416818,0.899999976,101.0127029,0,0.730000019,1.299999952,128,,0,0.206626211,4,0.926741882,0.8,101.1299463,0,0.65,1.5,162,,15,4.5,0.147176906,101.0713272,0.904747427,0.899999976,0,155,2.599999905,0.860000014,,30
2016-11-04 03:00:00,0.131648242,8.5,0.928700209,1,100.9101105,0,1.019999981,1.799999952,154,,-70,0.109749876,9.300000191,0.922037363,1.100000024,100.9980469,0,0.670000017,1.200000048,127,,-35,0.142910302,7.699999809,0.943924785,1,100.9687347,0,0.610000014,1.100000024,122,,0,0.206626211,4,0.928700221,1,101.0859795,0,0.49,1.2,157,,15,4.5,0.147176906,101.0420151,0.898251057,1,0,152,2.099999905,0.720000029,,30
2016-11-04 04:00:00,0.131648242,8.5,0.935416818,0.899999976,100.8807983,0,0.980000019,1.5,149,,-70,0.110205702,9.300000191,0.943924785,1,100.9687347,0,0.670000017,1.200000048,122,,-35,0.142910302,7.599999905,0.950751483,0.899999976,100.9394226,0,0.589999974,1.100000024,118,,0,0.206626211,4,0.935416804,0.9,101.0566683,0,0.5,1.3,149,,15,4.5,0.147176906,100.9980469,0.920082092,0.899999976,0,140,1.899999976,0.620000005,,30
2016-11-04 05:00:00,0.131648242,8.399999619,0.943924785,1,100.8514862,0,0.899999976,1.5,154,,-70,0.110205702,9.199999809,0.952268064,1.100000024,100.9247665,0,0.579999983,1.200000048,123,,-35,0.142481655,7.599999905,0.95914942,1,100.9247665,0,0.49000001,1,116,,0,0.206626211,4,0.943924814,1,101.0273571,0,0.39,1.3,150,,15,4.5,0.146751866,100.9687347,0.922037363,1.100000024,0,143,1.899999976,0.529999971,,30
2016-11-04 06:00:00,0.131648242,8.399999619,0.946745038,1.399999976,100.8075256,0,0.850000024,1.5,155,,-70,0.109749876,9.199999809,0.954662144,1.5,100.8514862,0,0.579999983,1.200000048,121,,-35,0.142481655,7.5,0.961537957,1.399999976,100.8807983,0,0.479999989,1,114,,0,0.206626211,4.1,0.961537929,1.4,100.9980459,0,0.38,1.1,145,,15,4.5,0.146751866,100.9101105,0.931952119,1.399999976,0,138,2.700000048,0.550000012,,30
2016-11-04 07:00:00,0.131648242,8.399999619,0.956246614,1.899999976,100.7489014,0,1.00999999,1.799999952,160,,-70,0.110205702,9.199999809,0.963607371,2,100.8221817,0,0.600000024,1.100000024,136,,-35,0.142481655,7.5,0.970518947,1.899999976,100.8368378,0,0.550000012,1.100000024,128,,0,0.205877814,4.1,0.956246638,1.9,100.9540791,0,0.51,1.2,163,,15,4.5,0.147176906,100.8954544,0.941974282,1.899999976,0,153,2.099999905,0.75,,30
2016-11-04 08:00:00,0.131648242,8.300000191,0.970941007,2.299999952,100.7489014,0,1.070000052,1.700000048,163,,-70,0.109749876,9.199999809,0.977821171,2.400000095,100.8075256,0,0.620000005,1.100000024,142,,-35,0.142481655,7.5,0.977821171,2.400000095,100.8075256,1.831054688,0.620000005,1.100000024,131,,0,0.204752763,4.1,0.970941019,2.3,100.924768,3.662109375,0.58,1.3,172,,15,4.5,0.147601604,100.8807983,0.950276971,2.400000095,3.662109375,159,2.599999905,0.899999976,,30
2016-11-04 09:00:00,0.131648242,8.300000191,0.969723344,3.099999905,100.7342453,5.493164063,0.819999993,1.399999976,172,,-70,0.109749876,9.100000381,0.975896895,3.200000048,100.8075256,7.32421875,0.560000002,1,161,,-35,0.142481655,7.5,0.988908827,3.200000048,100.8075256,20.14160156,0.430000007,1.299999952,144,,0,0.204752763,4.2,0.975896866,3.2,100.924768,38.45214844,0.61,2.2,196,,15,4.599999905,0.147601604,100.8514862,0.949872971,3.200000048,42.11425781,179,3.5,1.200000048,,30
2016-11-04 10:00:00,0.131648242,8.300000191,0.958016515,4.199999809,100.7342453,14.6484375,0.639999986,1.100000024,184,,-70,0.109749876,9.100000381,0.975404978,4.300000191,100.7782135,14.6484375,0.529999971,1,187,,-35,0.142481655,7.5,0.968593419,4.400000095,100.7928696,38.45214844,0.540000021,2.099999905,182,,0,0.205128108,4.4,0.938085848,4.5,100.924768,69.58007813,1.41,3.9,215,,15,4.699999809,0.147601604,100.8514862,0.907962084,4.599999905,75.07324219,191,5.5,2.400000095,,30
2016-11-04 11:00:00,0.131648242,8.300000191,0.922372758,5.099999905,100.7049332,21.97265625,0.589999974,1.200000048,189,,-70,0.109749876,9.100000381,0.932082951,5.300000191,100.7635574,23.80371094,0.469999999,1.200000048,189,,-35,0.142052665,7.5,0.908144951,5.5,100.7635574,60.42480469,0.629999995,3.299999952,186,,0,0.205877814,4.7,0.874920108,5.5,100.9101124,104.3701172,1.63,3.9,218,,15,5,0.147176906,100.8514862,0.86384517,5.5,111.6943359,194,5.400000095,2.619999886,,30
2016-11-04 12:00:00,0.131648242,8.300000191,0.881804943,6.099999905,100.675621,34.79003906,0.680000007,1.600000024,205,,-70,0.109749876,9.100000381,0.88019228,6.300000191,100.7489014,34.79003906,0.569999993,1.600000024,201,,-35,0.142052665,7.5,0.868142605,6.5,100.7342453,87.890625,1.129999995,4.5,205,,0,0.206252176,5.1,0.841658731,6.6,100.8661456,150.1464844,2.29,5,222,,15,5.300000191,0.146751866,100.8368378,0.821130455,6.599999905,164.7949219,198,6.599999905,3.200000048,,30
2016-11-04 13:00:00,0.131648242,8.300000191,0.848802745,7,100.6463089,25.63476563,0.689999998,1.799999952,210,,-70,0.109749876,9.100000381,0.827397883,7.199999809,100.7049332,25.63476563,0.569999993,1.299999952,210,,-35,0.142052665,7.599999905,0.831536412,7.300000191,100.6902771,67.74902344,1.070000052,4,201,,0,0.206252176,5.5,0.817547914,7.2,100.8368344,115.3564453,2.22,5.3,222,,15,5.699999809,0.147176906,100.8075256,0.792405307,7.300000191,122.6806641,198,6.599999905,3.25999999,,30
2016-11-04 14:00:00,0.131648242,8.300000191,0.848802745,7,100.5730362,16.47949219,0.649999976,1.200000048,210,,-70,0.109749876,9.100000381,0.827397883,7.199999809,100.6463089,16.47949219,0.529999971,1.399999976,212,,-35,0.142052665,7.800000191,0.821753621,7.300000191,100.6316528,42.11425781,1.100000024,4.300000191,201,,0,0.206626211,5.9,0.802188079,7.3,100.7635564,73.2421875,2.11,6.5,219,,15,6.099999905,0.147176906,100.7489014,0.782622516,7.300000191,76.90429688,197,6.800000191,3.079999924,,30
2016-11-04 15:00:00,0.131648242,8.399999619,0.838816822,7,100.5144119,10.98632813,0.620000005,1.299999952,191,,-70,0.109749876,9.199999809,0.827397883,7.199999809,100.6023483,10.98632813,0.560000002,1.100000024,183,,-35,0.142052665,7.900000095,0.831536412,7.300000191,100.5730362,32.95898438,0.550000012,2.299999952,178,,0,0.206252176,6.1,0.802188079,7.3,100.7195896,54.93164063,1.39,4.6,217,,15,6.300000191,0.147176906,100.7049332,0.782622516,7.300000191,58.59375,195,6.099999905,2.559999943,,30
2016-11-04 16:00:00,0.131648242,8.399999619,0.856276989,6.699999809,100.4411316,1.831054688,0.620000005,1.399999976,162,,-70,0.109293669,9.199999809,0.860536158,6.800000191,100.529068,1.831054688,0.389999986,0.899999976,134,,-35,0.142052665,8,0.870660126,6.800000191,100.5144119,12.81738281,0.310000002,1,118,,0,0.206252176,6.3,0.834537621,6.9,100.6463117,21.97265625,0.49,2.8,213,,15,6.400000095,0.146751866,100.6316528,0.798873186,7,23.80371094,190,4.900000095,1.230000019,,30
2016-11-04 17:00:00,0.131648242,8.5,0.865185022,6.199999809,100.4118195,0,0.790000021,1.5,167,,-70,0.109293669,9.199999809,0.869713783,6.300000191,100.4704437,0,0.479999989,1,144,,-35,0.142052665,8.100000381,0.886287093,6.199999809,100.4557877,0,0.319999993,0.899999976,130,,0,0.206252176,6.3,0.871180766,6.1,100.6023449,0,0.41,2.5,217,,15,6.400000095,0.146751866,100.5583801,0.827799857,6.300000191,0,193,3.200000048,1.029999971,,30
2016-11-04 18:00:00,0.131648242,8.600000381,0.879867733,5.599999905,100.4118195,0,0.649999976,1.200000048,172,,-70,0.10883709,9.300000191,0.873787642,5.699999809,100.4704437,0,0.449999988,1.200000048,156,,-35,0.142052665,8.199999809,0.897069991,5.5,100.4704437,0,0.230000004,0.699999988,147,,0,0.205877814,6.2,0.88101795,5.4,100.6023449,0,0.4,1.5,226,,15,6.400000095,0.146751866,100.5730362,0.830098271,5.699999809,0,194,2.599999905,1.00999999,,30
2016-11-04 19:00:00,0.131648242,8.600000381,0.887163281,5.300000191,100.3678589,0,0.75999999,1.299999952,175,,-70,0.10883709,9.300000191,0.881017923,5.400000095,100.4264755,0,0.600000024,1.200000048,165,,-35,0.142052665,8.199999809,0.904664874,5.199999809,100.4264755,0,0.360000014,0.899999976,156,,0,0.205503125,6,0.888210814,5.1,100.5583781,0,0.53,1.8,215,,15,6.300000191,0.146751866,100.5144119,0.842243612,5.300000191,0,192,3,1.230000019,,30
2016-11-04 20:00:00,0.131648242,8.600000381,0.876823485,5.099999905,100.3238907,0,0.829999983,1.399999976,170,,-70,0.10883709,9.300000191,0.882048249,5.199999809,100.3825073,0,0.579999983,1.200000048,158,,-35,0.142052665,8.199999809,0.905888438,5,100.3825073,0,0.360000014,0.800000012,149,,0,0.205503125,5.8,0.871487619,5,100.4997557,0,0.56,1.8,212,,15,6.199999809,0.146751866,100.4704437,0.836815,5.199999809,0,193,3.400000095,1.279999971,,30
2016-11-04 21:00:00,0.131648242,8.600000381,0.884378612,4.599999905,100.2652664,0,0.889999986,1.399999976,165,,-70,0.108380139,9.300000191,0.878217757,4.699999809,100.3385468,0,0.550000012,1.200000048,147,,-35,0.142052665,8.199999809,0.896170378,4.599999905,100.3238907,0,0.419999987,1,135,,0,0.205128108,5.7,0.884887791,4.4,100.455789,0,0.46,2,198,,15,6,0.146326452,100.4264755,0.831379473,4.699999809,0,189,3.099999905,1.090000033,,30
2016-11-04 22:00:00,0.131648242,8.600000381,0.879279315,4.099999905,100.2359543,0,0.920000017,1.600000024,160,,-70,0.108380139,9.399999619,0.885255754,4.199999809,100.3092346,0,0.540000021,1.100000024,138,,-35,0.141623303,8.199999809,0.891491473,4.099999905,100.2945786,0,0.50999999,1.100000024,125,,0,0.205128108,5.5,0.891725507,3.9,100.4264778,0,0.38,1.6,184,,15,5.900000095,0.146326452,100.3825073,0.842642665,4.099999905,0,176,2.400000095,0.790000021,,30
2016-11-04 23:00:00,0.131648242,8.600000381,0.885549724,3.799999952,100.1919861,0,0.930000007,1.600000024,161,,-70,0.108380139,9.399999619,0.87934041,3.900000095,100.2652664,0,0.569999993,1.200000048,136,,-35,0.141623303,8.199999809,0.898022234,3.799999952,100.2506104,0,0.560000002,1.100000024,124,,0,0.205128108,5.3,0.904473194,3.5,100.382511,0,0.39,1.3,177,,15,5.699999809,0.145900697,100.3385468,0.854125977,3.700000048,0,176,2.700000048,0.810000002,,30
2016-11-05 00:00:00,0.131648242,8.600000381,0.891498864,3.299999952,100.1333694,0,1.080000043,1.799999952,163,,-70,0.108380139,9.399999619,0.885222316,3.400000095,100.2066422,0,0.649999976,1.200000048,137,,-35,0.141623303,8.100000381,0.904419124,3.299999952,100.1919861,0,0.680000007,1.399999976,127,,0,0.205128108,5.2,0.904201484,3.1,100.3385442,0,0.55,1.6,172,,15,5.5,0.145900697,100.2799225,0.865658343,3.299999952,0,164,2.900000095,0.870000005,,30
2016-11-05 01:00:00,0.131648242,8.600000381,0.897430897,3,100.0747452,0,1.200000048,1.799999952,162,,-70,0.108380139,9.300000191,0.891097128,3.099999905,100.162674,0,0.709999979,1.299999952,137,,-35,0.141193599,8.100000381,0.910628438,3,100.1480179,0,0.720000029,1.299999952,129,,0,0.205128108,5,0.903814967,2.9,100.2945774,0,0.59,1.5,172,,15,5.300000191,0.145900697,100.2212982,0.86488837,3.099999905,0,162,3.099999905,1.00999999,,30
2016-11-05 02:00:00,0.131648242,8.600000381,0.898051679,3.400000095,100.0161209,0,1.029999971,1.5,158,,-70,0.107922807,9.300000191,0.898051679,3.400000095,100.0894012,0,0.680000007,1.100000024,132,,-35,0.141193599,8,0.910880983,3.400000095,100.0747452,0,0.74000001,1.399999976,125,,0,0.205128108,4.8,0.904419154,3.3,100.2066439,0,0.56,1.3,164,,15,5.199999809,0.145474568,100.162674,0.859563708,3.400000095,0,158,2.299999952,0.800000012,,30
2016-11-05 03:00:00,0.131648242,8.600000381,0.891498864,3.299999952,99.94284058,0,1.059999943,1.700000048,159,,-70,0.107922807,9.300000191,0.891498864,3.299999952,100.0014648,0,0.680000007,1.200000048,133,,-35,0.140763521,8,0.904419124,3.299999952,100.0014648,0,0.769999981,1.299999952,126,,0,0.205128108,4.8,0.891097115,3.1,100.1333659,0,0.59,1.4,163,,15,5.099999905,0.145474568,100.0894012,0.865658343,3.299999952,0,160,2.900000095,0.850000024,,30
2016-11-05 04:00:00,0.131648242,8.600000381,0.897825122,3.200000048,99.88422394,0,1.070000052,1.799999952,161,,-70,0.107922807,9.300000191,0.891498864,3.299999952,99.94284058,0,0.660000026,1.200000048,138,,-35,0.140763521,7.900000095,0.910837054,3.200000048,99.94284058,0,0.680000007,1.399999976,131,,0,0.205128108,4.8,0.904201484,3.1,100.0747435,0,0.54,1.4,176,,15,5.099999905,0.145900697,100.030777,0.871801198,3.200000048,0,171,3.200000048,0.860000014,,30
2016-11-05 05:00:00,0.131648242,8.5,0.898051679,3.400000095,99.8549118,0,0.959999979,1.700000048,162,,-70,0.107922807,9.300000191,0.904473186,3.5,99.89888,0,0.579999983,1.100000024,140,,-35,0.140763521,7.900000095,0.923710287,3.400000095,99.91352844,0,0.550000012,1.100000024,129,,0,0.204752763,4.7,0.904419154,3.3,100.0307767,0,0.43,1.3,188,,15,5,0.145474568,99.98680878,0.866255999,3.5,0,182,2.799999952,0.810000002,,30
2016-11-05 06:00:00,0.131648242,8.5,0.904368699,3.700000048,99.75231934,0,0.870000005,1.799999952,150,,-70,0.107465103,9.199999809,0.910494804,3.799999952,99.8109436,0,0.600000024,1.299999952,125,,-35,0.140763521,7.800000191,0.910494804,3.799999952,99.8109436,0,0.540000021,1.399999976,120,,0,0.20400109,4.7,0.904368686,3.7,99.95749878,0,0.37,2.7,187,,15,5,0.145474568,99.88422394,0.860604644,3.799999952,0,182,4.199999809,0.709999979,,30
2016-11-05 07:00:00,0.131648242,8.5,0.897776306,4,99.6497345,0,0.879999995,1.5,141,,-70,0.107007027,9.199999809,0.910074592,4,99.75231934,0,0.589999974,1.200000048,115,,-35,0.140333071,7.800000191,0.922372878,4,99.7230072,0,0.439999998,1,108,,0,0.203624762,4.8,0.904110584,3.9,99.86956522,0,0.25,2.1,202,,15,5.099999905,0.145474568,99.79628754,0.848875403,4.199999809,0,187,2.400000095,0.579999983,,30
2016-11-05 08:00:00,0.131210178,8.5,0.884887815,4.400000095,99.59111023,0,0.889999986,1.799999952,145,,-70,0.107007027,9.199999809,0.896845758,4.400000095,99.679039,0,0.600000024,1.299999952,119,,-35,0.140333071,7.800000191,0.915194809,4.300000191,99.679039,0,0.449999988,1.200000048,113,,0,0.20400109,4.8,0.891110731,4.3,99.81094284,0,0.37,2.4,217,,15,5.099999905,0.145474568,99.7669754,0.837211788,4.599999905,0,195,3,0.75,,30
2016-11-05 09:00:00,0.131210178,8.5,0.878217757,4.699999809,99.5178299,1.831054688,0.930000007,1.700000048,151,,-70,0.107007027,9.199999809,0.883732796,4.800000191,99.63507843,1.831054688,0.660000026,1.299999952,121,,-35,0.140333071,7.800000191,0.901636899,4.699999809,99.62042236,7.32421875,0.479999989,1.399999976,114,,0,0.20400109,4.9,0.872104711,4.8,99.75232047,14.6484375,0.53,3.6,219,,15,5.199999809,0.145474568,99.70835114,0.831397593,4.900000095,14.6484375,193,4.300000191,1.159999967,,30
2016-11-05 10:00:00,0.131210178,8.5,0.870739937,5.199999809,99.44454956,9.155273438,0.930000007,1.799999952,150,,-70,0.106548563,9.199999809,0.875933409,5.300000191,99.54714203,9.155273438,0.660000026,1.5,119,,-35,0.140333071,7.800000191,0.898393214,5.300000191,99.53248596,27.46582031,0.5,1.399999976,112,,0,0.204377091,5,0.858713698,5.4,99.66438691,51.26953125,0.51,4.2,234,,15,5.199999809,0.145474568,99.63507843,0.819545388,5.5,53.10058594,195,4.599999905,1.039999962,,30
2016-11-05 11:00:00,0.131210178,8.5,0.862865329,5.699999809,99.34196472,12.81738281,0.910000026,2.299999952,155,,-70,0.106548563,9.199999809,0.873787642,5.699999809,99.44454956,12.81738281,0.660000026,1.399999976,121,,-35,0.140333071,7.800000191,0.878601432,5.800000191,99.44454956,36.62109375,0.469999999,1.899999976,117,,0,0.204377091,5.2,0.850995762,5.9,99.56179775,64.08691406,0.7,4.5,234,,15,5.400000095,0.145474568,99.54714203,0.813035965,6,67.74902344,196,5.400000095,1.389999986,,30
2016-11-05 12:00:00,0.131210178,8.5,0.85192287,6.599999905,99.28334045,20.14160156,0.75999999,1.600000024,156,,-70,0.106548563,9.199999809,0.856276989,6.699999809,99.38593292,20.14160156,0.529999971,1.399999976,124,,-35,0.140333071,7.800000191,0.860536158,6.800000191,99.37127686,47.60742188,0.409999996,2.900000095,112,,0,0.204377091,5.5,0.824482951,6.9,99.48851979,89.72167969,0.67,3.6,226,,15,5.699999809,0.145474568,99.47386169,0.778901339,7,95.21484375,194,5.300000191,1.519999981,,30
2016-11-05 13:00:00,0.131210178,8.5,0.843003213,7.099999905,99.21006012,14.6484375,0.680000007,1.600000024,155,,-70,0.106089734,9.199999809,0.847097814,7.199999809,99.31265259,14.6484375,0.460000008,1.100000024,124,,-35,0.139902279,7.900000095,0.860884786,7.300000191,99.29799652,36.62109375,0.389999986,1.200000048,105,,0,0.204377091,5.8,0.816152397,7.4,99.41524182,65.91796875,0.52,3.3,216,,15,5.900000095,0.145474568,99.41524506,0.771994114,7.5,69.58007813,192,5.699999809,1.24000001,,30
2016-11-05 14:00:00,0.131210178,8.5,0.833830237,7.599999905,99.12213135,18.31054688,0.689999998,1.700000048,163,,-70,0.106089734,9.199999809,0.837679446,7.699999809,99.22471619,18.31054688,0.449999988,1.399999976,138,,-35,0.139902279,8,0.835729837,7.900000095,99.21006012,49.43847656,0.379999995,1.899999976,125,,0,0.204377091,6.1,0.802081079,8,99.32730826,84.22851563,0.83,3.4,224,,15,6.199999809,0.145474568,99.32730865,0.759591281,8.100000381,89.72167969,197,5,1.769999981,,30
2016-11-05 15:00:00,0.131210178,8.5,0.845120072,7.900000095,99.03419495,10.98632813,0.610000014,1.200000048,152,,-70,0.105630517,9.199999809,0.848713696,8,99.13678741,10.98632813,0.419999987,0.899999976,121,,-35,0.139902279,8,0.861487687,8.100000381,99.12213135,31.12792969,0.330000013,0.899999976,104,,0,0.20400109,6.4,0.822447787,8.3,99.2247191,53.10058594,0.44,2.4,216,,15,6.400000095,0.145474568,99.22471619,0.776756227,8.300000191,54.93164063,191,4.300000191,1.080000043,,30
2016-11-05 16:00:00,0.130771756,8.600000381,0.874449015,7.400000095,98.97557068,0,0.660000026,1.200000048,153,,-70,0.105170928,9.300000191,0.878143251,7.5,99.07816315,0,0.469999999,1,126,0.05,-35,0.139902279,8.100000381,0.887793183,7.5,99.06350708,1.831054688,0.379999995,0.899999976,113,0.05,0,0.201359882,6.5,0.86849335,7.5,99.18075232,5.493164063,0.26,1,181,0.4,15,6.599999905,0.146326452,99.13678741,0.833830237,7.599999905,5.493164063,176,2.599999905,0.589999974,0.4,30
2016-11-05 17:00:00,0.130332962,8.600000381,0.940487862,6.5,98.99022675,0,0.639999986,1.399999976,156,0.7,-70,0.105170928,9.300000191,0.944300056,6.599999905,99.06350708,0,0.439999998,0.800000012,129,0.65,-35,0.140333071,8.199999809,0.961157918,6.5,99.06350708,0,0.389999986,0.899999976,119,0.95,0,0.200981249,6.6,0.934035909,6.6,99.19540791,0,0.32,1.1,179,4.4,15,6.699999809,0.148873523,99.12213135,0.903243542,6.599999905,0,178,3.200000048,0.800000012,5.2,30
2016-11-05 18:00:00,0.128574133,8.699999809,0.953541636,6.300000191,98.94626617,0,0.699999988,1.200000048,163,1,-70,0.105170928,9.300000191,0.967802584,6.400000095,99.01953888,0,0.389999986,0.899999976,134,1,-35,0.140333071,8.199999809,0.97449857,6.300000191,99.01953888,0,0.360000014,0.800000012,123,1.2,0,0.195645644,6.5,0.953541621,6.3,99.15144113,0,0.45,2,200,4.6,15,6.699999809,0.148873523,99.09281921,0.926176667,6.400000095,0,184,3,1.090000033,5.2,30
2016-11-05 19:00:00,0.130771756,8.699999809,0.960144341,6.199999809,98.88764191,0,0.600000024,1.200000048,174,0.35,-70,0.108380139,9.399999619,0.97449857,6.300000191,98.94626617,0,0.360000014,0.800000012,161,0.3,-35,0.141193599,8.199999809,0.981246412,6.199999809,98.94626617,0,0.289999992,1.100000024,148,0.35,0,0.200602286,6.5,0.97069537,6.2,99.07816317,0,0.62,2.6,217,1.6,15,6.699999809,0.150564432,99.01953888,0.93904227,6.199999809,0,188,3.099999905,1.179999948,1.6,30
2016-11-05 20:00:00,0.141193599,8.699999809,0.964020073,6.300000191,98.85832977,0,0.370000005,0.800000012,193,0.15,-70,0.114743389,9.300000191,0.984977067,6.300000191,98.91695404,0,0.319999993,0.899999976,196,0.15,-35,0.144621253,8.300000191,0.984977067,6.300000191,98.91695404,0,0.330000013,1.200000048,182,0.2,0,0.208491486,6.5,0.974498579,6.3,99.03419638,0,0.86,2,214,0.6,15,6.699999809,0.156020626,98.99022675,0.953541636,6.300000191,0,188,2.799999952,1.350000024,0.8,30
2016-11-05 21:00:00,0.147176906,8.699999809,0.97449857,6.300000191,98.84367371,0,0.400000006,0.699999988,166,0.1,-70,0.121926203,9.300000191,0.978209019,6.400000095,98.90229797,0,0.280000001,0.600000024,160,0.1,-35,0.148873523,8.300000191,0.984977067,6.300000191,98.90229797,0,0.25999999,0.699999988,127,0.05,0,0.214405748,6.5,0.974498579,6.3,99.03419638,0,0.47,1.8,189,0.2,15,6.699999809,0.162654012,98.97557068,0.946989596,6.400000095,0,167,2.599999905,0.899999976,0.2,30
2016-11-05 22:00:00,0.151407763,8.699999809,0.97449857,6.300000191,98.84367371,0,0.349999994,0.699999988,180,0.05,-70,0.12813352,9.300000191,0.978209019,6.400000095,98.90229797,0,0.330000013,0.699999988,200,,-35,0.151407763,8.300000191,0.988615513,6.400000095,98.90229797,0,0.360000014,1.700000048,185,0.05,0,0.219512962,6.5,0.978209034,6.4,99.03419638,0,0.89,2.4,214,,15,6.699999809,0.165937051,98.97557068,0.95739609,6.400000095,0,188,2.799999952,1.399999976,,30
2016-11-05 23:00:00,0.153929189,8.699999809,0.971492946,6.5,98.85832977,0,0.330000013,0.800000012,215,,-70,0.132085949,9.399999619,0.985356569,6.599999905,98.91695404,0,0.379999995,0.899999976,232,,-35,0.153090134,8.300000191,0.992163002,6.5,98.93161011,0,0.629999995,3,205,,0,0.22348179,6.5,0.981827958,6.5,99.04885198,0,1.2,3.3,218,,15,6.699999809,0.167162448,98.99022675,0.961157918,6.5,0,199,3.099999905,1.559999943,0.2,30
2016-11-06 00:00:00,0.155185118,8.699999809,0.971492946,6.5,98.90229797,0,0.400000006,0.800000012,256,,-70,0.135139614,9.399999619,0.985356569,6.599999905,98.96091461,0,0.589999974,1.100000024,255,,-35,0.15350984,8.300000191,0.985356569,6.599999905,98.96091461,0,1.029999971,2.599999905,216,0.05,0,0.225987394,6.5,0.975092432,6.6,99.07816317,0,1.29,2.7,230,,15,6.699999809,0.167570204,99.01953888,0.954564154,6.599999905,0,212,3.400000095,1.350000024,,30
2016-11-06 02:00:00,0.156854734,8.800000191,0.956534743,5.099999905,98.91695404,0,0.349999994,0.800000012,269,0.05,-70,0.138175473,9.399999619,0.972514749,5.199999809,98.99022675,0,0.560000002,1.299999952,268,,-35,0.15434818,8.300000191,0.972514749,5.199999809,98.99022675,0,0.639999986,1.700000048,225,,0,0.227412212,6.5,0.949593297,6.2,99.10747435,0,1.5,3.4,229,,15,6.599999905,0.167570204,99.03419495,0.933760107,5.099999905,0,215,2.200000048,0.620000005,,30
2016-11-06 03:00:00,0.157271251,8.800000191,0.971894264,4.699999809,98.93161011,0,0.310000002,0.800000012,233,,-70,0.139039591,9.399999619,0.976757288,4.800000191,99.00488281,0,0.409999996,1.100000024,250,,-35,0.154766828,8.300000191,0.976757288,4.800000191,98.99022675,0,0.540000021,2.099999905,213,,0,0.227056481,6.4,0.956534722,5.1,99.10747435,0,0.73,2.5,237,,15,6.5,0.167570204,99.04885101,0.936765611,4.699999809,0,195,2,0.910000026,,30
2016-11-06 04:00:00,0.157687426,8.800000191,0.970143318,4.199999809,98.91695404,0,0.300000012,0.699999988,185,,-70,0.139471114,9.399999619,0.975404978,4.300000191,98.97557068,0,0.310000002,0.600000024,221,0.05,-35,0.154766828,8.300000191,0.982270122,4.199999809,98.99022675,0,0.310000002,1.700000048,177,,0,0.2256304,6.2,0.971894291,4.7,99.12212995,0,0.84,2,220,0.2,15,6.300000191,0.167570204,99.04885101,0.945889711,4.199999809,0,179,1.799999952,0.870000005,,30
2016-11-06 05:00:00,0.157687426,8.800000191,0.972857475,3.799999952,98.94626617,0,0.50999999,1,153,,-70,0.140333071,9.399999619,0.978421032,3.900000095,99.00488281,0,0.310000002,0.600000024,129,,-35,0.154766828,8.300000191,0.985329986,3.799999952,99.03419495,0,0.310000002,0.699999988,113,,0,0.223840684,6,0.970143312,4.2,99.10747435,0,0.66,1.8,201,,15,6.099999905,0.167570204,99.07816315,0.947912395,3.799999952,0,139,1.799999952,0.519999981,,30
2016-11-06 05:00:00,0.157687426,8.800000191,0.972857475,3.799999952,98.94626617,0,0.50999999,1,153,,-70,0.140333071,9.399999619,0.978421032,3.900000095,99.00488281,0,0.310000002,0.600000024,129,,-35,0.154766828,8.300000191,0.985329986,3.799999952,99.03419495,0,0.310000002,0.699999988,113,,0,0.222763049,5.8,0.972857453,3.8,99.13678554,0,0.33,0.9,153,,15,6.099999905,0.167570204,99.07816315,0.947912395,3.799999952,0,139,1.799999952,0.519999981,,30
2016-11-06 06:00:00,0.157687426,8.800000191,0.972857475,3.799999952,98.96091461,0,,,,,-70,0.140763521,9.399999619,0.990806103,3.900000095,99.03419495,0,0.300000012,0.699999988,154,,-35,0.154766828,8.199999809,0.997802496,3.799999952,99.04885101,0,0.25999999,0.600000024,124,,0,0.223122578,5.6,0.985329984,3.8,99.16609673,0,0.33,1.4,174,,15,5.900000095,0.167570204,99.09281921,0.960384905,3.799999952,0,153,1.799999952,0.600000024,0.2,30
2016-11-06 07:00:00,0.157687426,8.699999809,0.975404978,4.300000191,98.97557068,0,,,,,-70,0.140763521,9.399999619,0.987447023,4.300000191,99.03419495,0,0.180000007,0.600000024,192,,-35,0.154766828,8.199999809,0.987447023,4.300000191,99.04885101,0,0.159999996,0.5,102,,0,0.223122578,5.6,0.982270103,4.2,99.16609673,0,0.24,1,163,,15,5.800000191,0.167570204,99.15144348,0.963362932,4.300000191,3.662109375,165,3.5,0.589999974,,30
2016-11-06 07:00:00,0.157687426,8.699999809,0.975404978,4.300000191,98.97557068,0,,,,,-70,0.140763521,9.399999619,0.987447023,4.300000191,99.03419495,0,0.180000007,0.600000024,192,,-35,0.154766828,8.199999809,0.987447023,4.300000191,99.04885101,0,0.159999996,0.5,102,,0,0.223122578,5.6,0.982270103,4.2,99.16609673,0,0.24,1,163,,15,5.900000095,0.167570204,99.12213135,0.963362932,4.300000191,0,158,2.599999905,0.439999998,,30
2016-11-06 09:00:00,0.158103243,8.699999809,0.985583842,4.5,99.00488281,3.662109375,,,,,-70,0.141193599,9.399999619,0.990504086,4.599999905,99.06350708,5.493164063,0.119999997,0.400000006,177,,-35,0.154766828,8.100000381,0.990504086,4.599999905,99.06350708,16.47949219,0.140000001,1.299999952,161,,0,0.223840684,5.5,0.990504071,4.6,99.19540791,29.296875,0.42,1.6,217,0.2,15,5.800000191,0.167162448,99.15144348,0.966920614,4.599999905,32.95898438,184,1.899999976,0.720000029,,30
2016-11-06 10:00:00,0.158103243,8.699999809,0.98615706,5,99.01953888,9.155273438,,,,,-70,0.141193599,9.300000191,0.990696669,5.099999905,99.09281921,9.155273438,0.239999995,0.600000024,212,,-35,0.154766828,8.100000381,0.990696669,5.099999905,99.09281921,25.63476563,0.300000012,1.299999952,201,,0,0.2256304,5.6,0.990696677,5.1,99.2247191,47.60742188,0.6,1.7,216,,15,5.900000095,0.167162448,99.15144348,0.967922032,5.099999905,53.10058594,194,2.700000048,0.870000005,,30
2016-11-06 11:00:00,0.158103243,8.699999809,0.992539227,5.400000095,99.06350708,14.6484375,,,,,-70,0.141193599,9.300000191,0.996744454,5.5,99.13678741,14.6484375,0.170000002,0.600000024,205,,-35,0.154766828,8.100000381,0.996744454,5.5,99.13678741,38.45214844,0.340000004,1.700000048,209,,0,0.224915463,5.8,0.978852829,5.6,99.25403029,67.74902344,0.81,2.9,220,,15,6,0.166754335,99.18075562,0.945857763,5.599999905,73.2421875,192,3.5,1.200000048,,30
2016-11-06 12:00:00,0.158103243,8.699999809,0.976223826,5.800000191,99.09281921,18.31054688,,,,,-70,0.141193599,9.300000191,0.997917712,5.800000191,99.16609955,18.31054688,0.239999995,0.699999988,190,,-35,0.15434818,8.100000381,0.991033018,5.900000095,99.16609955,49.43847656,0.310000002,1.600000024,190,,0,0.217331861,6.1,0.941410032,6,99.28334148,84.22851563,0.84,2.5,219,,15,6.199999809,0.166345865,99.21006012,0.913677394,6.099999905,91.55273438,192,3.700000048,1.519999981,,30
2016-11-06 13:00:00,0.158103243,8.699999809,0.962805688,6,99.03419495,21.97265625,,,,,-70,0.141193599,9.300000191,0.994899213,6,99.10747528,21.97265625,0.200000003,0.600000024,217,,-35,0.15434818,8.199999809,0.953541636,6.300000191,99.12213135,58.59375,0.439999998,2.099999905,207,,0,0.212566451,6.4,0.922106183,6.3,99.2247191,98.87695313,1,3.2,226,,15,6.5,0.165527895,99.16609955,0.901149213,6.300000191,108.0322266,201,3.599999905,1.460000038,,30
2016-11-06 14:00:00,0.158103243,8.699999809,0.917940199,6.199999809,99.00488281,23.80371094,0.529999971,1.100000024,224,,-70,0.141193599,9.300000191,0.960144341,6.199999809,99.09281921,23.80371094,0.540000021,1.399999976,254,,-35,0.15434818,8.199999809,0.915770173,6.400000095,99.09281921,71.41113281,1.049999952,3.299999952,227,,0,0.211458992,6.6,0.888812678,6.5,99.21006351,113.5253906,1.43,3.9,238,,15,6.699999809,0.165118396,99.16609955,0.868142605,6.5,120.8496094,219,3.299999952,1.710000038,,30
2016-11-06 15:00:00,0.158103243,8.699999809,0.91162771,6.300000191,99.00488281,18.31054688,0.379999995,0.699999988,210,,-70,0.141193599,9.399999619,0.915770173,6.400000095,99.10747528,20.14160156,0.289999992,0.899999976,207,,-35,0.15434818,8.199999809,0.901031971,6.800000191,99.09281921,86.05957031,0.620000005,2.200000048,206,,0,0.211828469,6.8,0.870660122,6.8,99.21006351,113.5253906,1.19,3,225,,15,7,0.164298326,99.18075562,0.844592273,6.900000095,122.6806641,201,4.099999905,1.710000038,,30
2016-11-06 16:00:00,0.158518702,8.699999809,0.937172532,5.900000095,99.03419495,3.662109375,0.289999992,0.600000024,153,,-70,0.141193599,9.399999619,0.941410005,6,99.10747528,3.662109375,0.280000001,0.600000024,102,,-35,0.15434818,8.300000191,0.922106206,6.300000191,99.10747528,21.97265625,0.389999986,1.799999952,127,,0,0.211828469,7,0.907389151,6.2,99.2247191,29.296875,0.49,2.2,166,,15,7.099999905,0.164298326,99.18075562,0.886287093,6.199999809,31.12792969,139,2.700000048,0.74000001,,30
2016-11-06 17:00:00,0.158518702,8.800000191,0.963223159,5,99.07816315,0,0.419999987,0.699999988,146,,-70,0.141193599,9.399999619,0.967922032,5.099999905,99.15144348,0,0.370000005,0.600000024,106,,-35,0.15434818,8.399999619,0.967922032,5.099999905,99.13678741,1.831054688,0.379999995,0.600000024,104,,0,0.211458992,6.9,0.956534722,5.1,99.26868588,1.831054688,0.4,0.7,137,,15,7.099999905,0.163887769,99.21006012,0.933760107,5.099999905,1.831054688,119,1.200000048,0.670000017,,30
2016-11-06 18:00:00,0.158518702,8.800000191,0.975404978,4.300000191,99.09281921,0,0.579999983,1,149,,-70,0.141193599,9.399999619,0.973709345,4.5,99.15144348,0,0.419999987,0.699999988,112,,-35,0.15434818,8.399999619,0.980551362,4.400000095,99.16609955,0,0.430000007,0.800000012,110,,0,0.211458992,6.7,0.975404989,4.3,99.28334148,0,0.42,0.8,143,,15,7,0.163887769,99.22471619,0.944677532,4.400000095,0,122,1.200000048,0.699999988,,30
2016-11-06 19:00:00,0.158518702,8.800000191,0.972857475,3.799999952,99.13678741,0,0.540000021,0.800000012,148,,-70,0.141193599,9.399999619,0.978421032,3.900000095,99.19541168,0,0.430000007,0.699999988,115,,-35,0.15434818,8.399999619,0.985329986,3.799999952,99.19541168,0,0.419999987,0.899999976,108,,0,0.211458992,6.5,0.972857453,3.8,99.31265266,0,0.43,0.8,140,,15,6.699999809,0.163476869,99.25402832,0.947912395,3.799999952,0,122,1.100000024,0.670000017,,30
2016-11-06 20:00:00,0.158518702,8.800000191,0.974012792,3.599999905,99.15144348,0,0.50999999,0.800000012,145,,-70,0.141193599,9.399999619,0.992293417,3.700000048,99.21006012,0,0.419999987,0.800000012,114,,-35,0.153929189,8.399999619,0.999311805,3.599999905,99.21006012,0,0.409999996,0.800000012,105,,0,0.210719065,6.2,0.974012788,3.6,99.34196385,0,0.37,1,143,,15,6.400000095,0.163476869,99.26868439,0.955429435,3.5,0,128,1.399999976,0.519999981,,30
2016-11-06 21:00:00,0.158518702,8.800000191,0.974012792,3.599999905,99.16609955,0,0.360000014,0.699999988,171,,-70,0.140763521,9.399999619,0.992293417,3.700000048,99.22471619,0,0.310000002,0.800000012,164,,-35,0.15350984,8.300000191,0.993646622,3.5,99.22471619,0,0.270000011,0.800000012,160,,0,0.210719065,5.9,0.980907548,3.5,99.37127504,0,0.36,0.8,220,,15,6.199999809,0.163065612,99.28334045,0.955429435,3.5,0,184,1,0.479999989,,30
2016-11-06 22:00:00,0.157687426,8.800000191,0.985329986,3.799999952,99.18075562,0,0.200000003,0.5,147,0.05,-70,0.140763521,9.399999619,0.990806103,3.900000095,99.23937225,0,0.180000007,0.400000006,127,0.05,-35,0.15350984,8.199999809,1.003191233,3.900000095,99.25402832,0,0.209999993,0.899999976,112,0.05,0,0.212934957,5.8,0.990806119,3.9,99.37127504,0,0.36,0.9,164,0.2,15,6.099999905,0.164298326,99.31265259,0.966035962,3.900000095,0,132,1.100000024,0.50999999,0.4,30
2016-11-06 23:00:00,0.157687426,8.800000191,0.983864427,4,99.16609955,0,0.270000011,0.600000024,186,,-70,0.140763521,9.399999619,0.989189208,4.099999905,99.22471619,0,0.230000004,0.600000024,205,,-35,0.153090134,8.199999809,0.996162713,4,99.23937225,0,0.189999998,0.699999988,145,,0,0.215505454,5.8,0.983864432,4,99.35661944,0,0.31,0.9,193,,15,6,0.16470854,99.29799652,0.959267795,4,0,158,1.200000048,0.430000007,,30
2016-11-07 00:00:00,0.157271251,8.699999809,0.985329986,3.799999952,99.18075562,0,0.330000013,0.600000024,161,,-70,0.140763521,9.399999619,1.003191233,3.900000095,99.23937225,0,0.25999999,0.699999988,143,,-35,0.153090134,8.199999809,0.990806103,3.900000095,99.25402832,0,0.270000011,0.600000024,127,,0,0.215871379,5.8,0.997802516,3.8,99.37127504,0,0.35,0.8,164,0.2,15,6,0.16470854,99.31265259,0.966035962,3.900000095,0,140,1.5,0.579999983,0.2,30
2016-11-07 01:00:00,0.157271251,8.699999809,0.992293417,3.700000048,99.21006012,0,0.300000012,0.600000024,123,,-70,0.140763521,9.399999619,0.997802496,3.799999952,99.26868439,0,0.349999994,1,13,,-35,0.153090134,8.199999809,0.997802496,3.799999952,99.26868439,0,0.610000014,2.099999905,16,,0,0.215139208,5.7,0.99229342,3.7,99.41524182,0,0.57,2,26,,15,6,0.16470854,99.32730865,0.960384905,3.799999952,0,34,2.099999905,0.699999988,,30
2016-11-07 02:00:00,0.157271251,8.699999809,0.978421032,3.900000095,99.23937225,0,0.180000007,0.5,211,,-70,0.140763521,9.300000191,1.003191233,3.900000095,99.29799652,0,0.170000002,0.400000006,266,,-35,0.152670071,8.100000381,1.003191233,3.900000095,99.29799652,0,0.180000007,1.200000048,253,,0,0.214772639,5.7,0.990806119,3.9,99.444553,0,0.32,0.9,256,,15,5.900000095,0.164298326,99.37127686,0.966035962,3.900000095,0,90,1.200000048,0.370000005,,30
2016-11-07 03:00:00,0.156437859,8.699999809,0.990806103,3.900000095,99.25402832,0,0.219999999,0.5,227,0.3,-70,0.140763521,9.300000191,0.996162713,4,99.31265259,0,0.270000011,0.699999988,260,0.3,-35,0.152249649,8.100000381,1.003191233,3.900000095,99.31265259,0,0.280000001,1,242,0.35,0,0.215139208,5.7,0.990806119,3.9,99.444553,0,0.39,1.1,239,1.8,15,5.900000095,0.164298326,99.37127686,0.959267795,4,0,198,1.5,0.449999988,2,30
2016-11-07 04:00:00,0.15434818,8.699999809,0.978421032,3.900000095,99.26868439,0,0.340000004,0.699999988,268,0.1,-70,0.140763521,9.300000191,1.003191233,3.900000095,99.32730865,0,0.550000012,1.100000024,272,0.15,-35,0.151407763,8.100000381,1.003191233,3.900000095,99.32730865,0,0.5,1.299999952,265,0.15,0,0.216602263,5.7,0.990806119,3.9,99.47386419,0,0.57,1.4,273,0.6,15,5.900000095,0.165118396,99.40058899,0.966035962,3.900000095,0,253,1.299999952,0.589999974,0.6,30
2016-11-07 05:00:00,0.154766828,8.600000381,0.985329986,3.799999952,99.28334045,0,0.439999998,0.699999988,308,0.05,-70,0.140763521,9.300000191,0.990806103,3.900000095,99.35662079,0,0.779999971,1.299999952,301,,-35,0.151828885,8.100000381,0.997802496,3.799999952,99.34196472,0,0.910000026,1.700000048,329,,0,0.223122578,5.6,0.985329984,3.8,99.48851979,0,0.8,1.6,334,,15,5.900000095,0.165937051,99.42990112,0.972857475,3.799999952,0,329,1.700000048,0.839999974,,30
2016-11-07 06:00:00,0.155185118,8.600000381,0.993646622,3.5,99.29799652,0,0.310000002,0.5,291,,-70,0.141193599,9.300000191,0.999311805,3.599999905,99.37127686,0,0.550000012,0.899999976,292,,-35,0.152249649,8,0.999311805,3.599999905,99.37127686,0,0.409999996,1,311,,0,0.224915463,5.6,0.993646607,3.5,99.50317538,0,0.36,0.8,315,,15,5.900000095,0.166345865,99.42990112,0.961363256,3.599999905,0,313,1,0.330000013,,30
2016-11-07 07:00:00,0.155603051,8.600000381,0.980907559,3.5,99.34196472,0,0.370000005,0.600000024,298,,-70,0.141193599,9.300000191,0.999311805,3.599999905,99.41524506,0,0.639999986,1.100000024,294,,-35,0.152670071,8,0.999311805,3.599999905,99.41524506,0,0.569999993,1.299999952,312,,0,0.22455752,5.6,0.986662304,3.6,99.54714216,0,0.52,1.3,320,,15,5.800000191,0.166345865,99.45920563,0.961363256,3.599999905,0,312,1.100000024,0.5,,30
2016-11-07 08:00:00,0.156020626,8.600000381,0.986662328,3.599999905,99.40058899,0,0.460000008,0.800000012,307,,-70,0.141623303,9.199999809,0.992293417,3.700000048,99.45920563,0,0.779999971,1.299999952,299,,-35,0.152670071,8,0.992293417,3.700000048,99.47386169,0,0.819999993,2.099999905,328,,0,0.224199261,5.6,0.979732743,3.7,99.60576453,1.831054688,0.69,1.7,336,,15,5.800000191,0.166754335,99.5178299,0.967172086,3.700000048,1.831054688,328,1.799999952,0.699999988,0.2,30
2016-11-07 09:00:00,0.156437859,8.600000381,0.983864427,4,99.44454956,5.493164063,0.569999993,1.100000024,319,0.05,-70,0.141623303,9.199999809,0.989189208,4.099999905,99.5178299,5.493164063,0.930000007,1.600000024,308,,-35,0.153090134,8,0.989189208,4.099999905,99.5178299,18.31054688,1.610000014,3.200000048,346,0.05,0,0.22348179,5.6,0.976976984,4.1,99.64973131,32.95898438,1.32,3.1,356,0.2,15,5.800000191,0.166754335,99.5617981,0.952552557,4.099999905,36.62109375,346,3,1.440000057,,30
2016-11-07 10:00:00,0.156854734,8.5,0.968593419,4.400000095,99.48851776,12.81738281,0.620000005,1,329,,-70,0.141623303,9.199999809,0.973709345,4.5,99.57645416,12.81738281,0.949999988,2,321,,-35,0.153090134,8,0.955128908,4.599999905,99.5617981,36.62109375,2.470000029,4.199999809,355,,0,0.218060176,5.6,0.943337211,4.6,99.70835369,67.74902344,2.1,3.9,9,,15,5.900000095,0.166345865,99.6057663,0.913346469,4.699999809,73.2421875,357,4.699999809,2.480000019,,30
2016-11-07 11:00:00,0.157271251,8.5,0.936765611,4.699999809,99.54714203,29.296875,0.529999971,1.299999952,335,,-70,0.142052665,9.199999809,0.935322285,4.900000095,99.6497345,27.46582031,0.779999971,2,334,,-35,0.153090134,8,0.928822339,5,99.62042236,71.41113281,2.420000076,4.400000095,4,,0,0.211828469,5.8,0.905888446,5,99.76697606,124.5117188,2.3,4.5,22,,15,6,0.165937051,99.69369507,0.876823485,5.099999905,168.4570313,8,6,3.069999933,,30
2016-11-07 12:00:00,0.157271251,8.5,0.923775077,4.900000095,99.5617981,14.6484375,0.50999999,1.200000048,342,,-70,0.141623303,9.199999809,0.917355418,5,99.679039,12.81738281,0.819999993,2.299999952,343,,-35,0.153090134,8,0.91098547,5.099999905,99.6497345,38.45214844,2.519999981,5.300000191,5,,0,0.21108919,6.1,0.888210814,5.1,99.79628725,65.91796875,2.66,4.6,25,,15,6.199999809,0.165527895,99.7230072,0.870739937,5.199999809,82.39746094,10,6.5,3.49000001,,30
2016-11-07 13:00:00,0.157687426,8.5,0.918616951,4.800000191,99.59111023,10.98632813,0.680000007,1.700000048,339,,-70,0.142052665,9.199999809,0.900680721,4.900000095,99.70835114,10.98632813,1.110000014,2.400000095,335,0.05,-35,0.15350984,8,0.905888438,5,99.679039,31.12792969,3.309999943,7.099999905,3,,0,0.214038535,6.2,0.882954562,5,99.82559844,54.93164063,3.03,6.4,19,0.2,15,6.5,0.165118396,99.7669754,0.860020697,5,56.76269531,3,8,3.809999943,0.2,30
2016-11-07 14:00:00,0.157687426,8.5,0.920761645,4.400000095,99.62042236,20.14160156,0.709999979,1.299999952,338,,-70,0.142052665,9.199999809,0.91433686,4.5,99.7230072,20.14160156,1.090000033,2.299999952,328,,-35,0.15350984,8,0.907962084,4.599999905,99.70835114,60.42480469,2.950000048,4.5,0,,0,0.220599194,6.3,0.878217733,4.7,99.84025403,95.21484375,2.63,4.3,14,,15,6.599999905,0.165937051,99.78163147,0.866508186,4.699999809,100.7080078,0,5.099999905,3.25,,30
2016-11-07 15:00:00,0.157687426,8.600000381,0.889133513,4.900000095,99.66439056,12.81738281,0.75,1.899999976,334,,-70,0.142052665,9.199999809,0.882954538,5,99.78163147,12.81738281,1.090000033,2.799999952,324,,-35,0.15350984,8.100000381,0.876823485,5.099999905,99.75231934,42.11425781,2.819999933,4.699999809,357,,0,0.211828469,6.4,0.854048859,5.1,99.8988764,67.74902344,2.41,4.3,10,,15,6.599999905,0.165527895,99.8549118,0.84266156,5.099999905,71.41113281,357,5.5,3,,30
2016-11-07 16:00:00,0.158103243,8.600000381,0.878217757,4.699999809,99.7230072,1.831054688,0.949999988,1.700000048,334,,-70,0.142052665,9.199999809,0.878217757,4.699999809,99.82559967,1.831054688,1.24000001,2.5,322,,-35,0.15350984,8.100000381,0.883732796,4.800000191,99.8109436,12.81738281,3.130000114,5.400000095,357,,0,0.210719065,6.4,0.860476648,4.8,99.94284319,21.97265625,2.57,4.5,10,,15,6.699999809,0.16470854,99.88422394,0.831397593,4.900000095,21.97265625,356,5.199999809,3.089999914,,30
2016-11-07 17:00:00,0.158518702,8.600000381,0.885255754,4.199999809,99.78163147,0,0.74000001,1.5,349,,-70,0.142052665,9.199999809,0.879068673,4.300000191,99.86956787,0,1,2.299999952,335,,-35,0.15350984,8.100000381,0.891110718,4.300000191,99.8549118,0,2.769999981,4.599999905,3,,0,0.210719065,6.3,0.867026657,4.3,99.98680997,0,2.45,4,18,,15,6.599999905,0.164298326,99.92818451,0.849013984,4.400000095,0,3,4.599999905,2.920000076,,30
2016-11-07 18:00:00,0.158518702,8.600000381,0.910765231,3.599999905,99.8549118,0,0.670000017,1.200000048,350,,-70,0.142052665,9.199999809,0.904368699,3.700000048,99.91352844,0,0.930000007,2,336,,-35,0.15350984,8.100000381,0.916929364,3.700000048,99.91352844,0,2.369999886,4.099999905,3,,0,0.210719065,6.1,0.89180801,3.7,100.0454323,0,2.02,3.6,19,,15,6.5,0.164298326,99.98680878,0.866686642,3.700000048,0,4,4,2.390000105,,30
2016-11-07 19:00:00,0.158518702,8.600000381,0.923849046,3.200000048,99.88422394,0,0.550000012,1.299999952,355,,-70,0.142052665,9.199999809,0.917339444,3.299999952,99.94284058,0,0.769999981,2,337,,-35,0.15350984,8.100000381,0.930259705,3.299999952,99.95749664,0,2.289999962,4.699999809,5,,0,0.210719065,5.9,0.904419154,3.3,100.0747435,0,2.07,4,22,,15,6.199999809,0.163887769,100.030777,0.891498864,3.299999952,0,8,4.300000191,2.5,,30
2016-11-07 20:00:00,0.158518702,8.600000381,0.936850727,2.599999905,99.94284058,0,0.25,0.699999988,356,,-70,0.141623303,9.199999809,0.930217087,2.700000048,100.0161209,0,0.270000011,1,328,,-35,0.153090134,8.100000381,0.950428247,2.599999905,100.0014648,0,0.660000026,2.599999905,11,,0,0.210348614,5.7,0.936850721,2.6,100.1333659,0,0.78,2.4,31,,15,6,0.163476869,100.0600891,0.909695625,2.599999905,0,17,2.799999952,1.210000038,,30
2016-11-07 21:00:00,0.158518702,8.600000381,0.941974282,1.899999976,100.0014648,0,0.239999995,0.5,260,,-70,0.141623303,9.199999809,0.935266018,2,100.045433,0,0.200000003,0.5,289,,-35,0.153090134,8,0.963111103,1.799999952,100.0600891,0,0.159999996,0.600000024,76,,0,0.210348614,5.5,0.948736297,1.8,100.1919883,0,0.26,0.8,138,,15,5.800000191,0.163065612,100.1040573,0.919986725,1.799999952,0,74,1,0.360000014,,30
2016-11-07 22:00:00,0.158518702,8.5,0.954662144,1.5,100.030777,0,0.340000004,0.800000012,20,,-70,0.141623303,9.199999809,0.955552459,1.700000048,100.0747452,0,0.280000001,0.600000024,346,,-35,0.153090134,8,0.969349265,1.5,100.1187134,0,0.280000001,1.299999952,19,,0,0.210348614,5.3,0.962423291,1.6,100.2212995,0,0.59,1.9,46,,15,5.599999905,0.162654012,100.1480179,0.933258951,1.600000024,0,29,2.400000095,0.959999979,,30
2016-11-07 23:00:00,0.158518702,8.5,0.961537957,1.399999976,100.045433,0,0.180000007,0.5,55,,-70,0.141193599,9.199999809,0.954662144,1.5,100.0894012,0,0.150000006,0.400000006,341,,-35,0.153090134,7.900000095,0.983368516,1.299999952,100.1187134,0,0.159999996,1,27,,0,0.209977839,5.1,0.961537929,1.4,100.2212995,0,0.33,1.3,52,,15,5.400000095,0.162654012,100.162674,0.939975023,1.5,0,36,2.700000048,0.689999998,,30
2016-11-08 00:00:00,0.158518702,8.5,0.961537957,1.399999976,100.0600891,0,0.25,0.800000012,21,,-70,0.141193599,9.100000381,0.961537957,1.399999976,100.1040573,0,0.200000003,0.600000024,321,,-35,0.153090134,7.800000191,0.983368516,1.299999952,100.1333694,0,0.360000014,2,3,,0,0.209977839,4.9,0.961537929,1.4,100.2359551,0,0.74,2.3,38,,15,5.199999809,0.162654012,100.17733,0.939975023,1.5,0,25,3,1.360000014,,30
2016-11-08 01:00:00,0.158518702,8.399999619,0.952268064,1.100000024,100.045433,0,0.289999992,0.699999988,220,,-70,0.141193599,9.100000381,0.967383444,1.100000024,100.0894012,0,0.300000012,0.600000024,253,,-35,0.152670071,7.800000191,0.982498825,1.100000024,100.1187134,0,0.409999996,1.700000048,340,,0,0.209606739,4.8,0.967383453,1.1,100.2359551,0,0.56,2.1,16,,15,5.099999905,0.161829755,100.162674,0.930434763,1.200000048,0,23,2.700000048,0.75999999,,30
2016-11-08 02:00:00,0.158518702,8.399999619,0.973078966,0.800000012,100.030777,0,0.379999995,0.899999976,163,,-70,0.141193599,9.100000381,0.974373996,1,100.0747452,0,0.219999999,0.600000024,178,,-35,0.152670071,7.599999905,0.988524675,0.800000012,100.1040573,0,0.219999999,1.200000048,246,,0,0.209235313,4.6,0.966086208,0.9,100.2212995,0,0.35,1.7,298,,15,4.900000095,0.161829755,100.1333694,0.950751483,0.899999976,0,19,2.900000095,0.469999999,,30
2016-11-08 03:00:00,0.158518702,8.399999619,0.980128229,0.699999988,100.0161209,0,0.600000024,1.399999976,140,,-70,0.141193599,9,0.973078966,0.800000012,100.045433,0,0.379999995,0.899999976,120,,-35,0.152249649,7.599999905,0.980128229,0.699999988,100.0747452,0,0.239999995,0.800000012,110,,0,0.209235313,4.5,0.971564023,0.6,100.1919883,0,0.28,2.9,227,,15,4.800000191,0.161829755,100.1040573,0.949013054,0.699999988,0,149,1.700000048,0.360000014,,30
2016-11-08 04:00:00,0.158518702,8.300000191,0.965630114,0,100.0014648,0,0.289999992,0.699999988,158,,-70,0.141193599,9,0.974893093,0.100000001,100.0747452,0,0.239999995,0.699999988,291,,-35,0.152249649,7.5,0.981996715,0,100.0747452,0,0.219999999,1.5,353,,0,0.208863562,4.2,0.965630115,0,100.1919883,0,0.28,1.3,34,,15,4.599999905,0.161417112,100.1040573,0.949263513,0,0,35,1.799999952,0.409999996,,30
2016-11-08 05:00:00,0.158518702,8.300000191,0.981996715,0,100.0014648,0,0.319999993,1.100000024,150,,-70,0.141193599,9,0.974893093,0.100000001,100.0747452,0,0.180000007,0.800000012,238,,-35,0.151828885,7.400000095,0.991141319,0.100000001,100.0747452,0,0.270000011,1.100000024,333,,0,0.208863562,4,0.974893119,0.1,100.1773327,0,0.31,1.4,325,,15,4.400000095,0.161417112,100.1040573,0.951715946,0.200000003,0,24,2,0.449999988,,30
2016-11-08 06:00:00,0.158518702,8.199999809,0.980128229,0.699999988,99.98680878,0,0.400000006,0.800000012,138,,-70,0.141193599,8.899999619,0.988524675,0.800000012,100.030777,0,0.180000007,0.699999988,117,,-35,0.151828885,7.400000095,0.995685816,0.699999988,100.045433,0,0.189999998,1.5,263,,0,0.208863562,3.9,0.980128211,0.7,100.1773327,0,0.31,1.6,286,,15,4.300000191,0.161417112,100.0894012,0.957633257,0.800000012,0,165,1.799999952,0.370000005,,30
2016-11-08 07:00:00,0.158518702,8.199999809,0.981420934,0.899999976,99.97215271,0,0.479999989,1.100000024,137,,-70,0.140763521,8.899999619,0.989598572,1,100.0161209,0,0.239999995,0.800000012,113,,-35,0.151407763,7.300000191,0.9967556,0.899999976,100.045433,0,0.150000006,0.899999976,66,,0,0.208863562,3.9,0.981420909,0.9,100.1480215,0,0.27,1.5,289,,15,4.199999809,0.16224207,100.0894012,0.95914942,1,0,173,1.600000024,0.360000014,,30
2016-11-08 08:00:00,0.157687426,8.100000381,0.982498825,1.100000024,99.98680878,0,0.460000008,0.899999976,132,,-70,0.140763521,8.899999619,0.99046278,1.200000048,100.0161209,0,0.209999993,0.600000024,103,,-35,0.151407763,7.300000191,0.997614205,1.100000024,100.0600891,0,0.180000007,1.299999952,9,,0,0.212566451,3.9,0.98249882,1.1,100.1626771,1.831054688,0.32,1.9,338,0.2,15,4.199999809,0.163476869,100.1040573,0.960448742,1.200000048,1.831054688,23,1.899999976,0.460000008,0.2,30
2016-11-08 09:00:00,0.157687426,8.100000381,0.969349265,1.5,99.98680878,1.831054688,0.460000008,0.899999976,125,,-70,0.140763521,8.800000191,0.998723447,1.5,100.0161209,1.831054688,0.25,0.800000012,98,,-35,0.151407763,7.199999809,0.998723447,1.5,100.045433,10.98632813,0.209999993,1.299999952,49,,0,0.211828469,4,0.984036356,1.5,100.1626771,18.31054688,0.38,1.7,307,,15,4.300000191,0.163476869,100.0894012,0.947841108,1.600000024,20.14160156,31,2.900000095,0.529999971,0.2,30
2016-11-08 10:00:00,0.157687426,8,0.977485895,1.799999952,100.0014648,7.32421875,0.5,1,144,,-70,0.140763521,8.800000191,0.984791338,1.899999976,100.0161209,7.32421875,0.280000001,0.899999976,128,,-35,0.151407763,7.199999809,0.999063671,1.899999976,100.030777,23.80371094,0.239999995,1.799999952,159,0.05,0,0.210719065,4.1,0.984791314,1.9,100.1773327,40.28320313,0.41,2.3,267,,15,4.300000191,0.163476869,100.0894012,0.956246614,1.899999976,42.11425781,190,2.599999905,0.579999983,,30
2016-11-08 11:00:00,0.157687426,8,0.977583349,2.599999905,99.98680878,16.47949219,0.460000008,1.100000024,130,,-70,0.140763521,8.800000191,0.997624099,2.700000048,100.030777,16.47949219,0.230000004,0.800000012,99,,-35,0.151407763,7.199999809,0.990565896,2.799999952,100.030777,45.77636719,0.230000004,1.600000024,55,,0,0.209235313,4.3,0.977179864,2.8,100.1626771,78.73535156,0.4,2.4,297,,15,4.5,0.163065612,100.0894012,0.943689167,2.900000095,82.39746094,225,2.400000095,0.550000012,,30
2016-11-08 12:00:00,0.157687426,8,0.962198198,3.400000095,99.97215271,12.81738281,0.479999989,1,136,,-70,0.140763521,8.800000191,0.980907559,3.5,100.0014648,12.81738281,0.280000001,1,97,,-35,0.151407763,7.199999809,0.986662328,3.599999905,100.0161209,38.45214844,0.230000004,1.299999952,61,,0,0.208491486,4.6,0.942050715,3.7,100.1333659,65.91796875,0.45,2.3,268,,15,4.800000191,0.162654012,100.0747452,0.916929364,3.700000048,69.58007813,199,3.799999952,0.720000029,,30
2016-11-08 13:00:00,0.158103243,8,0.946969509,4,99.94284058,16.47949219,0.439999998,1.100000024,121,,-70,0.140763521,8.800000191,0.971566141,4,99.97215271,16.47949219,0.319999993,0.899999976,88,,-35,0.150986269,7.199999809,0.958016515,4.199999809,99.97215271,51.26953125,0.25999999,1.799999952,63,,0,0.208863562,4.9,0.915194805,4.3,100.1187103,89.72167969,0.39,3.1,295,,15,5,0.16224207,100.0600891,0.891110718,4.300000191,98.87695313,174,2.599999905,0.579999983,,30
2016-11-08 14:00:00,0.158103243,8,0.945889711,4.199999809,99.88422394,9.155273438,0.479999989,1.100000024,119,,-70,0.140763521,8.800000191,0.951320887,4.300000191,99.94284058,9.155273438,0.310000002,0.899999976,84,,-35,0.150986269,7.300000191,0.956635475,4.400000095,99.92818451,27.46582031,0.25,1.200000048,64,,0,0.208863562,5.2,0.907962065,4.6,100.0747435,49.43847656,0.34,3,324,,15,5.300000191,0.161829755,100.0014648,0.884378612,4.599999905,53.10058594,78,3.900000095,0.560000002,,30
2016-11-08 15:00:00,0.157687426,8,0.951320887,4.300000191,99.84025574,7.32421875,0.479999989,1,116,,-70,0.140763521,8.800000191,0.956635475,4.400000095,99.91352844,7.32421875,0.349999994,0.800000012,81,,-35,0.150564432,7.300000191,0.961834848,4.5,99.91352844,25.63476563,0.280000001,1.100000024,71,,0,0.208863562,5.3,0.913346442,4.7,100.0454323,43.9453125,0.34,2.5,132,,15,5.5,0.161829755,99.97215271,0.883732796,4.800000191,45.77636719,164,3.200000048,0.579999983,,30
2016-11-08 16:00:00,0.157687426,8,0.958016515,4.199999809,99.84025574,0,0.449999988,1.100000024,138,,-70,0.140763521,8.800000191,0.963362932,4.300000191,99.89888,0,0.25,0.699999988,113,,-35,0.150564432,7.300000191,0.963362932,4.300000191,99.89888,1.831054688,0.239999995,0.899999976,95,,0,0.209235313,5.4,0.914336839,4.5,100.0307767,5.493164063,0.52,2.9,201,,15,5.599999905,0.161417112,99.95749664,0.866508186,4.699999809,5.493164063,187,5.300000191,1.279999971,,30
2016-11-08 17:00:00,0.157687426,8,0.928880751,3.900000095,99.8549118,0,0.550000012,1.100000024,149,,-70,0.140333071,8.800000191,0.946969509,4,99.89888,0,0.349999994,0.899999976,99,,-35,0.150142252,7.400000095,0.953650892,3.900000095,99.89888,0,0.300000012,0.899999976,88,,0,0.209235313,5.4,0.910074599,4,100.0454323,0,0.45,2.7,208,,15,5.599999905,0.161417112,99.98680878,0.867067099,4.099999905,0,189,6.199999809,1.149999976,,30
2016-11-08 18:00:00,0.157687426,8.100000381,0.936064243,3.599999905,99.88422394,0,0.639999986,1.200000048,145,0.05,-70,0.140333071,8.800000191,0.961363256,3.599999905,99.91352844,0,0.389999986,0.899999976,103,,-35,0.150142252,7.400000095,0.968168497,3.5,99.92818451,0,0.319999993,0.899999976,87,,0,0.208863562,5.4,0.942690371,3.5,100.0454323,0,0.27,1.8,161,0.2,15,5.599999905,0.161004096,99.98680878,0.891808033,3.700000048,0,178,3.900000095,0.709999979,,30
2016-11-08 19:00:00,0.155603051,8.100000381,0.949368894,3.400000095,99.88422394,0,0.75999999,1.399999976,148,0.2,-70,0.140333071,8.800000191,0.962198198,3.400000095,99.91352844,0,0.460000008,1,112,0.2,-35,0.150142252,7.400000095,0.969020545,3.299999952,99.94284058,0,0.379999995,1.200000048,94,0.3,0,0.209977839,5.3,0.949368889,3.4,100.0600879,0,0.47,2.6,185,1.8,15,5.5,0.16224207,99.98680878,0.904473186,3.5,0,183,6,1.139999986,2,30
2016-11-08 20:00:00,0.153929189,8.100000381,0.956618965,3.099999905,99.89888,0,0.649999976,1.600000024,179,0.05,-70,0.140763521,8.800000191,0.962884903,3.200000048,99.94284058,0,0.460000008,1.299999952,180,0.05,-35,0.1497197,7.400000095,0.969723344,3.099999905,99.95749664,0,0.430000007,3.099999905,166,0.05,0,0.212566451,5.2,0.943514592,3.1,100.0893991,0,1.08,4.7,211,0.4,15,5.400000095,0.163065612,100.0161209,0.923849046,3.200000048,0,192,5.800000191,2.279999971,0.4,30
2016-11-08 21:00:00,0.154766828,8.100000381,0.936850727,2.599999905,99.94284058,0,0.779999971,1.600000024,233,,-70,0.140763521,8.800000191,0.943698466,2.700000048,100.0161209,0,0.779999971,2.099999905,244,,-35,0.1497197,7.400000095,0.943698466,2.700000048,100.0014648,0,1.570000052,5,205,0.05,0,0.219512962,5.1,0.916735657,2.7,100.1333659,0,2.44,5.4,224,,15,5.300000191,0.162654012,100.0747452,0.889772832,2.700000048,0,203,6.800000191,3.210000038,,30
2016-11-08 22:00:00,0.154766828,8.100000381,0.933258951,1.600000024,99.97215271,0,0.74000001,1.5,205,,-70,0.140333071,8.800000191,0.941074371,1.700000048,100.030777,0,0.560000002,1.200000048,210,,-35,0.1497197,7.400000095,0.933258951,1.600000024,100.045433,0,0.839999974,4.099999905,195,,0,0.216967222,5,0.918676778,1.6,100.1626771,0,1.8,5,215,,15,5.199999809,0.163065612,100.0894012,0.88951242,1.600000024,0,193,6.699999809,2.789999962,0.2,30
2016-11-08 23:00:00,0.155185118,8.100000381,0.935416818,0.899999976,99.97215271,0,0.730000019,1.5,204,,-70,0.140333071,8.800000191,0.950751483,0.899999976,100.030777,0,0.569999993,1.399999976,210,,-35,0.1497197,7.400000095,0.957633257,0.800000012,100.0600891,0,0.889999986,3.200000048,192,,0,0.211828469,4.8,0.920082102,0.9,100.1626771,0,1.81,4.9,212,,15,5,0.163065612,100.1040573,0.904747427,0.899999976,0,190,6.800000191,2.680000067,,30
2016-11-09 00:00:00,0.155185118,8,0.947045803,0.5,99.98680878,0,0.75999999,1.600000024,197,,-70,0.140333071,8.800000191,0.947045803,0.5,100.0747452,0,0.579999983,1.200000048,206,,-35,0.1497197,7.300000191,0.953923583,0.400000006,100.0747452,0,0.850000024,3,194,,0,0.208491486,4.5,0.922126108,0.4,100.1773327,0,1.65,4.1,211,,15,4.800000191,0.162654012,100.1040573,0.90622741,0.400000006,0,190,5.300000191,2.599999905,,30
2016-11-09 01:00:00,0.155185118,8,0.947045803,0.5,100.0014648,0,0.74000001,1.5,203,,-70,0.140333071,8.800000191,0.947045803,0.5,100.0894012,0,0.560000002,1.399999976,214,,-35,0.1497197,7.300000191,0.953923583,0.400000006,100.0747452,0,0.99000001,3.5,203,,0,0.207746355,4.2,0.922126108,0.4,100.1919883,0,1.84,4.5,216,,15,4.5,0.162654012,100.1187134,0.899693489,0.5,0,193,5.199999809,2.769999981,,30
2016-11-09 02:00:00,0.155603051,8,0.931261718,0.5,100.0161209,0,0.75999999,1.5,224,,-70,0.140333071,8.699999809,0.931261718,0.5,100.1040573,0,0.709999979,1.600000024,244,,-35,0.1497197,7.199999809,0.938024819,0.400000006,100.0894012,0,1.600000024,4.400000095,210,,0,0.208119083,4.1,0.9154776,0.5,100.2066439,0,2.26,4.1,223,,15,4.400000095,0.162654012,100.1333694,0.899693489,0.5,0,202,5.599999905,2.970000029,,30
2016-11-09 03:00:00,0.155603051,7.900000095,0.938024819,0.400000006,100.0161209,0,0.670000017,1.200000048,210,,-70,0.140333071,8.699999809,0.931261718,0.5,100.1187134,0,0.529999971,1.299999952,229,,-35,0.1497197,7.099999905,0.938024819,0.400000006,100.1040573,0,1.090000033,4.199999809,208,,0,0.209235313,4,0.922126108,0.4,100.2212995,0,1.82,4.4,220,,15,4.300000191,0.162654012,100.1480179,0.899693489,0.5,0,197,4.699999809,2.569999933,,30
2016-11-09 04:00:00,0.155603051,7.900000095,0.922126114,0.400000006,100.0014648,0,0.560000002,1.100000024,218,,-70,0.139902279,8.699999809,0.915477574,0.5,100.1040573,0,0.479999989,1.299999952,235,,-35,0.1497197,7.099999905,0.938024819,0.400000006,100.0894012,0,0.920000017,2.599999905,209,,0,0.209235313,3.9,0.906227382,0.4,100.2066439,0,1.59,4.1,220,,15,4.199999809,0.162654012,100.1333694,0.883909404,0.5,0,197,4.300000191,2.00999999,,30
2016-11-09 05:00:00,0.155603051,7.800000191,0.938024819,0.400000006,99.98680878,0,0.449999988,0.899999976,198,,-70,0.139902279,8.600000381,0.938024819,0.400000006,100.0747452,0,0.319999993,0.699999988,220,,-35,0.1497197,7.099999905,0.944842756,0.300000012,100.0600891,0,0.529999971,2,202,,0,0.209606739,3.8,0.922126108,0.4,100.1773327,0,1.14,2.4,215,,15,4.099999905,0.16224207,100.1040573,0.90622741,0.400000006,0,193,3.200000048,1.590000033,,30
2016-11-09 06:00:00,0.155603051,7.800000191,0.9128142,0.300000012,99.95749664,0,0.550000012,1,209,,-70,0.139902279,8.600000381,0.928828478,0.300000012,100.0600891,0,0.430000007,1,231,,-35,0.1497197,7,0.935585141,0.200000003,100.045433,0,0.850000024,2.799999952,206,,0,0.209977839,3.8,0.896799902,0.3,100.1626771,0,1.56,4.1,220,,15,4.099999905,0.161829755,100.0894012,0.880785644,0.300000012,0,198,4.599999905,2.119999886,,30
2016-11-09 07:00:00,0.156020626,7.800000191,0.900163651,0,99.95749664,0,0.529999971,1.200000048,226,,-70,0.139471114,8.600000381,0.877403796,0.100000001,100.0600891,0,0.560000002,2.299999952,248,,-35,0.1497197,6.900000095,0.893652022,0.100000001,100.045433,0,1.059999943,3.299999952,216,,0,0.210348614,3.7,0.861155588,0.1,100.1480215,0,1.49,3.9,224,,15,4,0.161417112,100.1040573,0.844907343,0.100000001,0,206,3.5,1.74000001,,30
2016-11-09 08:00:00,0.156020626,7.699999809,0.906728208,-0.100000001,99.95749664,0,0.400000006,0.699999988,139,,-70,0.139471114,8.600000381,0.900163651,0,100.0747452,0,0.150000006,0.400000006,128,,-35,0.1497197,6.900000095,0.900163651,0,100.0600891,3.662109375,0.140000001,1,149,,0,0.210719065,3.6,0.883797054,0,100.1626771,7.32421875,0.34,1.3,172,,15,3.900000095,0.161417112,100.1187134,0.867430449,0,7.32421875,143,1.600000024,0.529999971,,30
2016-11-09 09:00:00,0.156437859,7.699999809,0.926148474,0.100000001,99.97215271,7.32421875,0.379999995,0.899999976,148,,-70,0.139902279,8.5,0.935585141,0.200000003,100.0747452,7.32421875,0.150000006,0.699999988,99,,-35,0.1497197,6.900000095,0.935585141,0.200000003,100.0600891,23.80371094,0.159999996,1.200000048,114,,0,0.210719065,3.6,0.896799902,0.3,100.1773327,42.11425781,0.41,2.5,222,,15,3.900000095,0.161004096,100.1187134,0.874429941,0.400000006,47.60742188,179,3.5,0.720000029,,30
2016-11-09 10:00:00,0.156437859,7.699999809,0.902340233,0.699999988,99.98680878,18.31054688,0.540000021,1.399999976,165,,-70,0.139471114,8.5,0.911296189,0.800000012,100.0600891,20.14160156,0.270000011,0.899999976,149,,-35,0.1497197,6.800000191,0.904747427,0.899999976,100.0747452,42.11425781,0.389999986,2.5,192,,0,0.210719065,3.6,0.874077997,0.9,100.1773327,78.73535156,0.94,3.4,227,,15,3.900000095,0.161004096,100.1333694,0.843408585,0.899999976,97.04589844,196,5,1.50999999,,30
2016-11-09 11:00:00,0.156854734,7.599999905,0.872780561,1.399999976,99.97215271,31.12792969,0.550000012,1.700000048,169,,-70,0.139471114,8.5,0.881226599,1.5,100.045433,32.95898438,0.289999992,1.100000024,162,,-35,0.1497197,6.800000191,0.874930263,1.600000024,100.045433,58.59375,0.389999986,2.400000095,207,,0,0.210719065,3.7,0.831183751,1.6,100.1626771,106.2011719,1,3.8,238,,15,4,0.161004096,100.1480179,0.799250901,1.899999976,249.0234375,201,6.099999905,1.590000033,,30
2016-11-09 12:00:00,0.156854734,7.599999905,0.84419179,2.099999905,99.91352844,34.79003906,0.519999981,1.399999976,172,,-70,0.139471114,8.399999619,0.8521595,2.200000048,100.0014648,27.46582031,0.349999994,1.200000048,179,,-35,0.1497197,6.800000191,0.832235157,2.299999952,99.97215271,67.74902344,0.579999983,2.599999905,214,,0,0.21108919,3.8,0.798783516,2.4,100.1187103,113.5253906,1.22,4.8,235,,15,4.199999809,0.160590753,100.1040573,0.752258241,3,331.4208984,203,4.900000095,1.690000057,,30
2016-11-09 13:00:00,0.157271251,7.599999905,0.828230321,2.599999905,99.88422394,27.46582031,0.560000002,1.299999952,165,,-70,0.139471114,8.399999619,0.841807902,2.599999905,99.97215271,27.46582031,0.349999994,2.400000095,150,,-35,0.1497197,6.800000191,0.837357998,2.900000095,99.94284058,82.39746094,0.5,2.799999952,191,,0,0.211458992,4,0.805048313,3,100.0747435,199.5849609,1.27,4.4,232,,15,4.699999809,0.160590753,100.0600891,0.765455782,3,232.5439453,201,6.199999809,1.980000019,,30
2016-11-09 14:00:00,0.157687426,7.599999905,0.849328637,2.700000048,99.8549118,18.31054688,0.540000021,1.399999976,164,,-70,0.139471114,8.399999619,0.843319595,2.799999952,99.95749664,16.47949219,0.330000013,1.100000024,138,,-35,0.14929679,6.800000191,0.838679612,3.099999905,99.92818451,86.05957031,0.379999995,3.599999905,145,,0,0.211458992,4.2,0.7913226,3.7,100.0600879,181.2744141,0.99,3.9,225,,15,5.099999905,0.160177037,100.030777,0.76434356,3.5,214.2333984,197,5,1.75999999,,30
2016-11-09 15:00:00,0.157687426,7.599999905,0.880099177,2.200000048,99.84025574,7.32421875,0.400000006,1,118,,-70,0.139039591,8.399999619,0.887717485,2.299999952,99.92818451,7.32421875,0.25,0.800000012,82,,-35,0.14929679,6.800000191,0.870091677,2.799999952,99.91352844,76.90429688,0.25999999,1,73,,0,0.211458992,4.6,0.819753367,3.2,100.0454323,87.890625,0.42,2.5,199,,15,5.199999809,0.160177037,100.0161209,0.786262155,3.099999905,102.5390625,180,3.900000095,0.810000002,,30
2016-11-09 16:00:00,0.157687426,7.599999905,0.912118256,1.700000048,99.8109436,1.831054688,0.610000014,1.100000024,122,,-70,0.139039591,8.399999619,0.905611932,1.799999952,99.89888,3.662109375,0.449999988,1.200000048,85,,-35,0.148873523,6.900000095,0.90047121,2.099999905,99.88422394,40.28320313,0.300000012,0.800000012,80,,0,0.210719065,4.6,0.872331493,2.1,100.0161212,36.62109375,0.3,1.3,94,,15,5.199999809,0.159762979,99.98680878,0.838189662,2.200000048,40.28320313,126,2.599999905,0.579999983,,30
2016-11-09 17:00:00,0.157687426,7.599999905,0.911296189,0.800000012,99.79628754,0,0.689999998,1.200000048,124,,-70,0.139039591,8.399999619,0.926741898,0.800000012,99.8549118,0,0.460000008,1.100000024,91,,-35,0.148873523,6.900000095,0.933455467,0.699999988,99.86956787,1.831054688,0.239999995,0.800000012,88,,0,0.210719065,4.4,0.924552861,0.6,99.98680997,1.831054688,0.22,0.9,93,,15,5.099999905,0.159762979,99.92818451,0.886782646,0.699999988,1.831054688,63,1.600000024,0.360000014,,30
2016-11-09 18:00:00,0.157687426,7.599999905,0.922126114,0.400000006,99.79628754,0,0.670000017,1.200000048,131,,-70,0.139039591,8.399999619,0.938024819,0.400000006,99.8549118,0,0.349999994,0.899999976,99,,-35,0.148873523,6.900000095,0.944842756,0.300000012,99.88422394,0,0.180000007,0.600000024,90,,0,0.210348614,4.1,0.935585167,0.2,99.98680997,0,0.2,1.3,279,,15,4.800000191,0.159348577,99.92818451,0.890328646,0.400000006,0,104,1.600000024,0.349999994,,30
2016-11-09 19:00:00,0.157687426,7.599999905,0.935585141,0.200000003,99.78163147,0,0.829999983,1.5,137,,-70,0.139039591,8.399999619,0.944842756,0.300000012,99.84025574,0,0.469999999,1.100000024,113,,-35,0.148449913,6.900000095,0.958644927,0.100000001,99.86956787,0,0.289999992,0.899999976,113,,0,0.209977839,3.9,0.93289689,0,99.98680997,0,0.26,1.9,210,,15,4.5,0.159348577,99.92818451,0.896799922,0.300000012,0,163,2.200000048,0.409999996,,30
2016-11-09 20:00:00,0.157687426,7.599999905,0.923214197,-0.100000001,99.78163147,0,0.889999986,1.799999952,143,,-70,0.139039591,8.399999619,0.932896912,0,99.84025574,0,0.540000021,1.100000024,119,,-35,0.148449913,6.800000191,0.946558774,-0.200000003,99.86956787,0,0.319999993,1,118,,0,0.209606739,3.6,0.943594,-0.4,99.98680997,0,0.25,1.8,214,,15,4.199999809,0.159348577,99.91352844,0.88379705,0,0,186,2.5,0.50999999,,30
2016-11-09 21:00:00,0.157687426,7.599999905,0.920017958,-0.300000012,99.7669754,0,0.790000021,1.5,141,,-70,0.139039591,8.399999619,0.936745584,-0.300000012,99.8549118,0,0.479999989,1.100000024,118,,-35,0.148449913,6.699999809,0.950498283,-0.5,99.8549118,0,0.25,0.899999976,117,,0,0.209977839,3.3,0.933525082,-0.5,99.97215437,0,0.24,2.2,224,,15,3.900000095,0.158933818,99.91352844,0.880133569,-0.200000003,0,192,3,0.479999989,,30
2016-11-09 22:00:00,0.157687426,7.5,0.940361381,-0.600000024,99.75231934,0,0.720000029,1.399999976,150,,-70,0.139039591,8.399999619,0.950498283,-0.5,99.8549118,0,0.400000006,0.800000012,124,,-35,0.148449913,6.699999809,0.964476287,-0.699999988,99.8549118,0,0.239999995,0.800000012,134,,0,0.210719065,3.1,0.936852792,-0.8,99.95749878,0,0.26,1.7,220,,15,3.700000048,0.158518702,99.88422394,0.899578691,-0.5,0,188,2,0.460000008,,30
2016-11-09 23:00:00,0.157271251,7.5,0.943730652,-0.899999976,99.73766327,0,0.680000007,1.200000048,163,,-70,0.138607711,8.300000191,0.954201937,-0.800000012,99.84025574,0,0.349999994,0.800000012,148,,-35,0.148449913,6.599999905,0.957655787,-1.100000024,99.84025574,0,0.219999999,1,156,,0,0.21108919,3,0.950664844,-1,99.94284319,0,0.36,1.8,218,,15,3.599999905,0.158518702,99.86956787,0.919503689,-0.800000012,0,198,2.400000095,0.680000007,,30
2016-11-10 00:00:00,0.157271251,7.400000095,0.957655787,-1.100000024,99.73766327,0,0.850000024,1.399999976,138,,-70,0.138607711,8.300000191,0.968269765,-1,99.84025574,0,0.519999981,0.899999976,110,,-35,0.148449913,6.5,0.975390196,-1.100000024,99.84025574,0,0.360000014,0.899999976,106,,0,0.211458992,2.9,0.964704082,-1.2,99.94284319,0,0.3,1,133,,15,3.5,0.158103243,99.8549118,0.92218709,-1.100000024,0,140,1.700000048,0.349999994,,30
2016-11-10 01:00:00,0.157271251,7.400000095,0.946839213,-1.200000048,99.7230072,0,0.75,1.399999976,137,,-70,0.138607711,8.300000191,0.957655787,-1.100000024,99.8109436,0,0.389999986,1.100000024,112,,-35,0.14802593,6.5,0.971810162,-1.299999952,99.8109436,0,0.230000004,0.800000012,111,,0,0.212197622,2.8,0.960845451,-1.4,99.913532,0,0.24,1.3,181,,15,3.400000095,0.158103243,99.84025574,0.935817182,-1.299999952,0,176,1.600000024,0.360000014,,30
2016-11-10 02:00:00,0.157271251,7.300000191,0.96084547,-1.399999976,99.70835114,0,0.430000007,0.899999976,132,,-70,0.138607711,8.199999809,0.96084547,-1.399999976,99.79628754,0,0.180000007,0.699999988,75,,-35,0.14802593,6.400000095,0.982289493,-1.700000048,99.78163147,0,0.150000006,0.699999988,307,,0,0.212934957,2.7,0.967934989,-1.5,99.8988764,0,0.29,1.6,249,,15,3.299999952,0.158103243,99.82559967,0.924587131,-1.399999976,0,197,1.799999952,0.409999996,,30
2016-11-10 03:00:00,0.157271251,7.300000191,0.953813672,-1.299999952,99.679039,0,0.460000008,1,118,,-70,0.138607711,8.199999809,0.971810162,-1.299999952,99.7669754,0,0.209999993,0.800000012,48,,-35,0.14802593,6.300000191,0.982289493,-1.700000048,99.7669754,0,0.189999998,0.899999976,319,,0,0.213303139,2.6,0.949672065,-1.5,99.88422081,0,0.3,1.6,335,,15,3.200000048,0.158103243,99.79628754,0.917820692,-1.299999952,0,67,1.600000024,0.460000008,,30
2016-11-10 04:00:00,0.157271251,7.199999809,0.946839213,-1.200000048,99.6497345,0,0.560000002,1.200000048,137,,-70,0.138175473,8.100000381,0.964704096,-1.200000048,99.73766327,0,0.219999999,0.800000012,128,,-35,0.147601604,6.300000191,0.978974581,-1.399999976,99.73766327,0,0.189999998,1,222,,0,0.213303139,2.6,0.946839192,-1.2,99.85490962,0,0.42,1.5,262,,15,3.099999905,0.158103243,99.7669754,0.911109388,-1.200000048,0,200,2.900000095,0.49000001,,30
2016-11-10 05:00:00,0.157271251,7.199999809,0.943730652,-0.899999976,99.6497345,0,0.519999981,1.600000024,119,,-70,0.138175473,8.100000381,0.954201937,-0.800000012,99.7230072,0,0.349999994,1.399999976,83,,-35,0.147601604,6.199999809,0.961207151,-0.899999976,99.73766327,0,0.230000004,1.200000048,6,,0,0.212934957,2.5,0.919503666,-0.8,99.85490962,0,0.41,2,307,,15,3,0.157687426,99.78163147,0.89558512,-0.699999988,0,6,4.5,0.569999993,,30
2016-11-10 06:00:00,0.157271251,7.099999905,0.930030704,-0.699999988,99.62042236,0,0.689999998,1.299999952,96,,-70,0.137742862,8.100000381,0.940361381,-0.600000024,99.69369507,0,0.519999981,1.299999952,68,,-35,0.147176906,6.199999809,0.964476287,-0.699999988,99.70835114,0,0.289999992,2.200000048,50,,0,0.212566451,2.5,0.930030699,-0.7,99.82559844,0,0.49,2.8,29,,15,3,0.157271251,99.7669754,0.882605553,-0.5,0,23,4.300000191,0.839999974,,30
2016-11-10 07:00:00,0.157271251,7.099999905,0.939921439,-1.100000024,99.63507843,0,0.519999981,1.100000024,96,,-70,0.137742862,8,0.933059931,-1,99.7230072,0,0.389999986,1,61,,-35,0.147176906,6.099999905,0.964704096,-1.200000048,99.7230072,0,0.289999992,1.899999976,32,,0,0.212197622,2.4,0.928974301,-1.2,99.82559844,0,0.54,2.2,26,,15,2.900000095,0.156854734,99.75231934,0.904452682,-1.100000024,0,19,2.900000095,0.889999986,,30
2016-11-10 08:00:00,0.157271251,7.099999905,0.9427163,-1.399999976,99.66439056,0,0.370000005,1.100000024,90,,-70,0.137742862,8,0.935817182,-1.299999952,99.7669754,0,0.280000001,0.899999976,3,,-35,0.147176906,6.099999905,0.967934966,-1.5,99.75231934,1.831054688,0.569999993,2,358,,0,0.212566451,2.4,0.949672065,-1.5,99.86956522,5.493164063,0.79,2.3,12,,15,2.900000095,0.156437859,99.78163147,0.906457961,-1.399999976,5.493164063,15,2.799999952,0.949999988,,30
2016-11-10 09:00:00,0.157271251,7.099999905,0.938287258,-1.600000024,99.70835114,5.493164063,0.49000001,1.299999952,51,,-70,0.137742862,8,0.949672043,-1.5,99.79628754,5.493164063,0.379999995,1.200000048,13,,-35,0.146751866,6.099999905,0.975082815,-1.600000024,99.78163147,20.14160156,0.74000001,2.700000048,1,,0,0.212197622,2.4,0.956685037,-1.6,99.8988764,36.62109375,1.16,3.7,19,,15,2.799999952,0.156437859,99.82559967,0.91988945,-1.600000024,38.45214844,12,5.800000191,1.549999952,,30
2016-11-10 10:00:00,0.156854734,7,0.9427163,-1.399999976,99.73766327,10.98632813,0.540000021,1.899999976,26,,-70,0.137742862,8,0.946839213,-1.200000048,99.82559967,10.98632813,0.389999986,1.5,351,,-35,0.146751866,6.099999905,0.96084547,-1.399999976,99.8109436,32.95898438,1.419999957,4.199999809,1,,0,0.211458992,2.4,0.942716291,-1.4,99.92818759,56.76269531,1.78,3.7,22,,15,2.799999952,0.156437859,99.8549118,0.906457961,-1.399999976,60.42480469,14,4.5,2.190000057,,30
2016-11-10 11:00:00,0.156854734,7,0.939921439,-1.100000024,99.7669754,20.14160156,0.430000007,1.700000048,11,,-70,0.137742862,7.900000095,0.950664818,-1,99.8549118,20.14160156,0.400000006,1.299999952,323,,-35,0.146751866,5.900000095,0.957655787,-1.100000024,99.8549118,53.10058594,1.470000029,3.599999905,0,,0,0.210719065,2.3,0.939921444,-1.1,99.95749878,95.21484375,1.7,3.6,20,,15,2.700000048,0.156437859,99.88422394,0.92218709,-1.100000024,106.2011719,12,5.199999809,2.079999924,,30
2016-11-10 12:00:00,0.156854734,6.900000095,0.930030704,-0.699999988,99.75231934,21.97265625,0.409999996,1.600000024,21,,-70,0.137309894,7.900000095,0.940361381,-0.600000024,99.8549118,21.97265625,0.409999996,1.299999952,319,,-35,0.146751866,5.900000095,0.954201937,-0.800000012,99.8549118,56.76269531,1.620000005,4,1,,0,0.208863562,2.3,0.936852792,-0.8,99.94284319,104.3701172,1.84,4.8,21,,15,2.700000048,0.156020626,99.88422394,0.919503689,-0.800000012,117.1875,16,5.300000191,2.220000029,,30
2016-11-10 13:00:00,0.156854734,6.900000095,0.923214197,-0.100000001,99.75231934,34.79003906,0.610000014,1.799999952,351,,-70,0.137309894,7.900000095,0.932896912,0,99.84025574,34.79003906,0.600000024,1.5,314,,-35,0.146751866,5.900000095,0.946558774,-0.200000003,99.8549118,100.7080078,1.970000029,4.599999905,358,,0,0.206999919,2.3,0.923214188,-0.1,99.95749878,195.9228516,2.1,5.4,18,,15,2.700000048,0.156020626,99.89888,0.890242279,-0.100000001,225.2197266,12,5.900000095,2.519999981,,30
2016-11-10 14:00:00,0.156854734,6.900000095,0.90622741,0.400000006,99.79628754,16.47949219,0.479999989,1.200000048,1,,-70,0.137309894,7.900000095,0.922126114,0.400000006,99.86956787,16.47949219,0.419999987,1.399999976,327,,-35,0.146751866,5.900000095,0.944842756,0.300000012,99.88422394,54.93164063,1.49000001,4.300000191,3,,0,0.205877814,2.4,0.906227382,0.4,99.98680997,87.890625,1.68,4,24,,15,2.700000048,0.155603051,99.94284058,0.890328646,0.400000006,98.87695313,17,4.900000095,1.99000001,,30
2016-11-10 15:00:00,0.156854734,6.900000095,0.908882499,0.600000024,99.82559967,12.81738281,0.319999993,1.100000024,5,,-70,0.137309894,7.800000191,0.91789782,0.699999988,99.89888,12.81738281,0.330000013,0.899999976,320,,-35,0.146751866,6,0.933455467,0.699999988,99.92818451,62.25585938,1.200000048,2.900000095,1,,0,0.206626211,2.5,0.902340257,0.7,100.0307767,78.73535156,1.35,3.1,22,,15,2.799999952,0.155185118,99.98680878,0.886782646,0.699999988,86.05957031,16,4.199999809,1.720000029,,30
2016-11-10 16:00:00,0.156854734,6.900000095,0.91789782,0.699999988,99.88422394,3.662109375,0.370000005,0.800000012,217,,-70,0.137309894,7.800000191,0.920082092,0.899999976,99.95749664,3.662109375,0.330000013,0.699999988,250,,-35,0.146751866,6.099999905,0.942187607,0.800000012,99.98680878,21.97265625,0.709999979,2.700000048,355,,0,0.2073733,2.6,0.911296184,0.8,100.0747435,31.12792969,0.85,3,20,,15,2.900000095,0.155185118,100.030777,0.89585048,0.800000012,34.79003906,21,3.599999905,1.139999986,,30
2016-11-10 17:00:00,0.156854734,6.900000095,0.938024819,0.400000006,99.92818451,0,0.319999993,0.899999976,224,,-70,0.137309894,7.800000191,0.924552858,0.600000024,100.0014648,0,0.360000014,1.200000048,265,,-35,0.146751866,6.099999905,0.947045803,0.5,100.0161209,0,0.349999994,1.399999976,297,,0,0.207746355,2.7,0.931261697,0.5,100.1333659,0,0.37,1.6,301,,15,3,0.155185118,100.045433,0.908882499,0.600000024,0,300,1.899999976,0.430000007,,30
2016-11-10 18:00:00,0.156437859,6.900000095,0.944842756,0.300000012,99.97215271,0,0.200000003,0.5,149,,-70,0.137309894,7.800000191,0.953923583,0.400000006,100.0747452,0,0.140000001,0.5,304,,-35,0.146326452,6.099999905,0.960857034,0.300000012,100.0747452,0,0.129999995,0.699999988,28,,0,0.208119083,2.6,0.944842754,0.3,100.1919883,0,0.2,0.9,120,,15,3,0.155185118,100.1040573,0.922126114,0.400000006,0,89,1,0.330000013,,30
2016-11-10 19:00:00,0.156437859,6.900000095,0.951715946,0.200000003,100.0161209,0,0.209999993,0.600000024,24,,-70,0.137309894,7.800000191,0.944842756,0.300000012,100.1187134,0,0.189999998,0.600000024,317,,-35,0.146326452,6.099999905,0.958644927,0.100000001,100.1187134,0,0.150000006,0.899999976,20,,0,0.208119083,2.6,0.951715945,0.2,100.2212995,0,0.29,1,69,,15,3,0.155185118,100.1480179,0.9128142,0.300000012,0,40,1.899999976,0.660000026,,30
2016-11-10 20:00:00,0.156437859,6.900000095,0.960443914,-0.400000006,100.0600891,0,0.280000001,0.800000012,78,,-70,0.137309894,7.800000191,0.953473151,-0.300000012,100.1480179,0,0.209999993,0.600000024,38,,-35,0.146326452,6.099999905,0.960443914,-0.400000006,100.1480179,0,0.170000002,0.5,59,,0,0.208119083,2.6,0.960443893,-0.4,100.2506106,0,0.33,0.9,93,,15,2.900000095,0.155603051,100.1919861,0.926744103,-0.400000006,0,69,1.700000048,0.600000024,,30
2016-11-10 21:00:00,0.156437859,6.900000095,0.960443914,-0.400000006,100.1040573,0,0.340000004,1,91,,-70,0.136876568,7.800000191,0.970200777,-0.300000012,100.17733,0,0.239999995,0.800000012,43,,-35,0.146326452,6.099999905,0.984444618,-0.5,100.1919861,0,0.349999994,1.700000048,14,,0,0.208119083,2.5,0.960443893,-0.4,100.2799218,0,0.63,1.8,32,,15,2.799999952,0.155185118,100.2212982,0.936745584,-0.300000012,0,25,2.5,1.080000043,,30
2016-11-10 22:00:00,0.156020626,6.900000095,0.970200777,-0.300000012,100.1333694,0,0.230000004,0.899999976,38,,-70,0.136876568,7.800000191,0.963165045,-0.200000003,100.2066422,0,0.239999995,0.699999988,323,,-35,0.145900697,6.099999905,0.986928344,-0.300000012,100.2066422,0,0.699999988,1.799999952,356,,0,0.208491486,2.4,0.97020076,-0.3,100.309233,0,0.8,1.8,16,,15,2.799999952,0.155603051,100.2506104,0.929952443,-0.200000003,0,14,2.200000048,1.00999999,,30
2016-11-10 23:00:00,0.156020626,6.900000095,0.956186116,-0.100000001,100.162674,0,0.239999995,0.699999988,95,,-70,0.136876568,7.800000191,0.965630114,0,100.2359543,0,0.189999998,0.5,17,,-35,0.145900697,6,0.972672105,-0.100000001,100.2506104,0,0.330000013,1.399999976,4,,0,0.208863562,2.4,0.949263502,0,100.3531998,0,0.61,1.8,19,,15,2.700000048,0.155603051,100.2945786,0.932896912,0,0,17,2.200000048,0.930000007,,30
2016-11-11 00:00:00,0.156020626,6.900000095,0.958644927,0.100000001,100.1919861,0,0.270000011,0.800000012,171,,-70,0.13644287,7.800000191,0.967846751,0.200000003,100.2652664,0,0.270000011,0.800000012,290,,-35,0.145474568,5.900000095,0.974893093,0.100000001,100.2652664,0,0.349999994,1.299999952,329,,0,0.208863562,2.4,0.9586449,0.1,100.382511,0,0.46,1.7,348,,15,2.700000048,0.155603051,100.3092346,0.9423967,0.100000001,0,17,2.299999952,0.479999989,,30
2016-11-11 01:00:00,0.156020626,6.800000191,0.951715946,0.200000003,100.2212982,0,0.200000003,0.699999988,67,,-70,0.13644287,7.800000191,0.960857034,0.300000012,100.3092346,0,0.230000004,0.699999988,334,,-35,0.145474568,5.900000095,0.967846751,0.200000003,100.3092346,0,0.449999988,1.299999952,357,,0,0.208863562,2.4,0.951715945,0.2,100.4118222,0,0.6,1.6,13,,15,2.799999952,0.155603051,100.3532028,0.935585141,0.200000003,0,16,2.400000095,0.930000007,,30
2016-11-11 02:00:00,0.155603051,6.800000191,0.967846751,0.200000003,100.2652664,0,0.230000004,0.699999988,71,,-70,0.13644287,7.800000191,0.976871312,0.300000012,100.3385468,0,0.200000003,0.5,332,,-35,0.145474568,5.900000095,0.976871312,0.300000012,100.3532028,0,0.400000006,1.5,357,,0,0.208863562,2.5,0.967846724,0.2,100.455789,0,0.64,1.5,19,,15,2.799999952,0.155185118,100.3971634,0.944842756,0.300000012,0,20,1.899999976,0.860000014,,30
2016-11-11 03:00:00,0.155603051,6.800000191,0.967846751,0.200000003,100.2945786,0,0.25,0.899999976,143,,-70,0.136008814,7.800000191,0.976871312,0.300000012,100.3678589,0,0.25,0.699999988,304,,-35,0.145474568,5.900000095,0.983977497,0.200000003,100.3825073,0,0.5,1.5,346,,0,0.208863562,2.5,0.967846724,0.2,100.4851001,0,0.71,2.2,12,,15,2.799999952,0.155185118,100.4118195,0.935585141,0.200000003,0,21,3.599999905,0.850000024,,30
2016-11-11 04:00:00,0.155603051,6.800000191,0.965630114,0,100.2799225,0,0.319999993,1.299999952,75,,-70,0.136008814,7.699999809,0.974893093,0.100000001,100.3678589,0,0.239999995,0.899999976,21,,-35,0.145048082,5.900000095,0.981996715,0,100.3971634,0,0.660000026,2.799999952,5,,0,0.208863562,2.5,0.965630115,0,100.4997557,0,1.26,3.2,21,,15,2.799999952,0.155185118,100.4118195,0.949263513,0,0,19,4.5,1.669999957,,30
2016-11-11 05:00:00,0.155603051,6.800000191,0.963165045,-0.200000003,100.3385468,0,0.439999998,1.600000024,68,,-70,0.136008814,7.699999809,0.972672105,-0.100000001,100.4118195,0,0.360000014,1.399999976,22,,-35,0.145048082,5.900000095,0.979771316,-0.200000003,100.4264755,0,0.699999988,2.700000048,5,,0,0.208863562,2.5,0.97020076,-0.3,100.5437225,0,1.31,3.6,24,,15,2.799999952,0.155185118,100.4704437,0.953473151,-0.300000012,0,22,4.800000191,1.860000014,,30
2016-11-11 06:00:00,0.155603051,6.800000191,0.960443914,-0.400000006,100.4118195,0,0.639999986,1.700000048,34,,-70,0.136008814,7.699999809,0.986928344,-0.300000012,100.4704437,0,0.409999996,1.299999952,24,,-35,0.145048082,5.900000095,0.986928344,-0.300000012,100.4850998,0,0.939999998,3.400000095,11,,0,0.208863562,2.5,0.97020076,-0.3,100.6023449,0,1.73,4.5,30,,15,2.799999952,0.155185118,100.529068,0.953473151,-0.300000012,0,22,4.800000191,2.369999886,,30
2016-11-11 07:00:00,0.155185118,6.800000191,0.960443914,-0.400000006,100.4997559,0,0.439999998,1.399999976,36,,-70,0.136008814,7.699999809,0.986928344,-0.300000012,100.5876923,0,0.280000001,1,347,,-35,0.145048082,5.900000095,0.986928344,-0.300000012,100.5876923,0,1.100000024,3.5,6,,0,0.208863562,2.5,0.95347316,-0.3,100.6902785,0,1.83,4.6,26,,15,2.799999952,0.155185118,100.6023483,0.936745584,-0.300000012,0,21,5.5,2.230000019,,30
2016-11-11 08:00:00,0.15434818,6.800000191,0.953473151,-0.300000012,100.5876923,0,0.49000001,2,27,,-70,0.136008814,7.699999809,0.963165045,-0.200000003,100.675621,0,0.349999994,0.800000012,0,,-35,0.145048082,5.800000191,0.970200777,-0.300000012,100.660965,0,1.179999948,3.400000095,8,,0,0.208491486,2.4,0.95347316,-0.3,100.778212,0,1.76,3.5,33,,15,2.799999952,0.155185118,100.7049332,0.920017958,-0.300000012,1.831054688,23,3.900000095,2.230000019,,30
2016-11-11 09:00:00,0.155185118,6.800000191,0.957458854,-0.600000024,100.660965,7.32421875,0.600000024,1.5,12,,-70,0.136008814,7.699999809,0.967471421,-0.5,100.7489014,7.32421875,0.5,1.399999976,344,,-35,0.145048082,5.800000191,0.967471421,-0.5,100.7489014,20.14160156,1.549999952,6.300000191,6,,0,0.208491486,2.4,0.950498266,-0.5,100.85149,42.11425781,1.93,5.4,34,,15,2.700000048,0.155185118,100.7928696,0.933525085,-0.5,49.43847656,22,6,2.470000029,,30
2016-11-11 10:00:00,0.15350984,6.699999809,0.946558774,-0.200000003,100.7342453,14.6484375,0.460000008,1.600000024,23,,-70,0.136008814,7.699999809,0.956186116,-0.100000001,100.8221817,14.6484375,0.449999988,1.399999976,346,,-35,0.145048082,5.800000191,0.963165045,-0.200000003,100.8368378,38.45214844,1.700000048,4.900000095,5,,0,0.208863562,2.3,0.946558747,-0.2,100.9394235,69.58007813,1.98,4.7,29,,15,2.700000048,0.155185118,100.8661423,0.913346171,-0.200000003,76.90429688,18,4.900000095,2.5,,30
2016-11-11 11:00:00,0.153929189,6.699999809,0.919454396,0.200000003,100.8221817,36.62109375,0.649999976,2.400000095,27,,-70,0.136008814,7.599999905,0.928828478,0.300000012,100.9101105,34.79003906,0.540000021,2,2,,-35,0.144621253,5.800000191,0.944842756,0.300000012,100.8954544,76.90429688,1.5,5.099999905,6,,0,0.208863562,2.5,0.912814186,0.3,101.0127015,146.484375,1.98,4.7,25,,15,2.799999952,0.154766828,100.9540787,0.896799922,0.300000012,208.7402344,17,5.300000191,2.460000038,,30
2016-11-11 12:00:00,0.153929189,6.699999809,0.90622741,0.400000006,100.8807983,36.62109375,0.75999999,2.400000095,27,,-70,0.136008814,7.599999905,0.915477574,0.5,100.9833908,34.79003906,0.600000024,1.799999952,1,,-35,0.144621253,5.800000191,0.922126114,0.400000006,100.9833908,80.56640625,1.580000043,5.5,5,,0,0.208863562,2.7,0.906227382,0.4,101.0859795,150.1464844,2.15,5.9,27,,15,3.099999905,0.154766828,101.027359,0.883909404,0.5,210.5712891,18,6.699999809,2.720000029,,30
2016-11-11 13:00:00,0.153929189,6.699999809,0.89585048,0.800000012,100.9540787,31.12792969,0.550000012,2.200000048,10,,-70,0.135574386,7.599999905,0.898251057,1,101.0713272,29.296875,0.49000001,1.899999976,338,,-35,0.144621253,5.800000191,0.913475633,1,101.0420151,80.56640625,1.49000001,4.400000095,0,,0,0.208863562,3,0.883026439,1,101.1592574,135.4980469,1.82,4.9,22,,15,3.5,0.154766828,101.1152878,0.867801845,1,148.3154297,18,6,2.24000001,,30
2016-11-11 14:00:00,0.15350984,6.699999809,0.89591372,1.5,101.0420151,23.80371094,0.699999988,1.5,340,0.05,-70,0.135574386,7.599999905,0.89591372,1.5,101.1445999,23.80371094,0.730000019,1.700000048,327,,-35,0.144194052,5.800000191,0.910600781,1.5,101.1152878,71.41113281,2.079999924,4.199999809,3,,0,0.208863562,3.3,0.881226588,1.5,101.247191,111.6943359,2.11,3.9,26,,15,3.700000048,0.15434818,101.2032242,0.866539478,1.5,120.8496094,14,3.799999952,2.430000067,,30
2016-11-11 15:00:00,0.15350984,6.800000191,0.897640169,1.700000048,101.1006317,10.98632813,0.319999993,1,39,,-70,0.135574386,7.599999905,0.884884953,1.899999976,101.2032242,12.81738281,0.300000012,1.200000048,352,,-35,0.144194052,5.900000095,0.868963003,2.599999905,101.1885681,120.8496094,0.75999999,3.5,8,,0,0.208863562,3.5,0.853872034,2.4,101.3058134,113.5253906,0.93,3.7,26,,15,3.900000095,0.15434818,101.2618484,0.832235157,2.299999952,130.0048828,24,3.599999905,1.320000052,,30
[truncated: 2,427,337 more chars]
